# Supplementary material for: The Effects of Fermented Chinese Herbal Medicine on Growth Performance, Immunity, Intestinal Microbiota, and Intestinal Metabolite Profile of Broiler Chicks
Source: Research Square preprint supplement (doi:10.21203/rs.3.rs-7238260/v1), 2025-08-12
Supplement: Supplementary file 1 [file 7c7cbb7ac7a76c46641b4953.docx]

A B


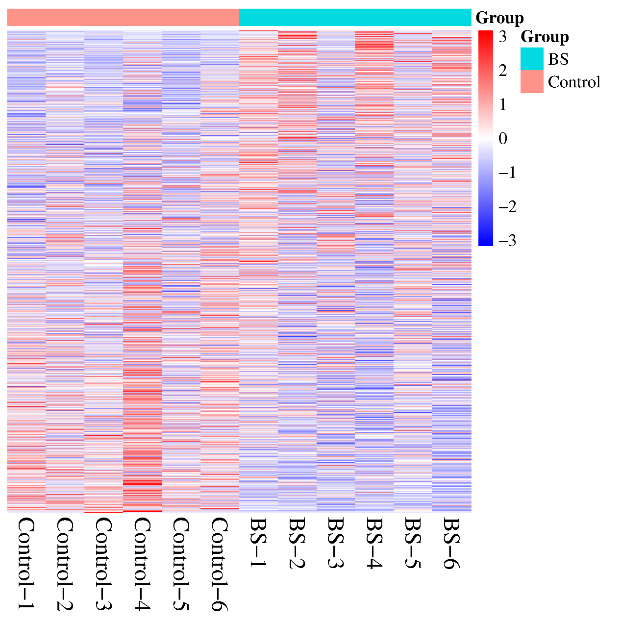

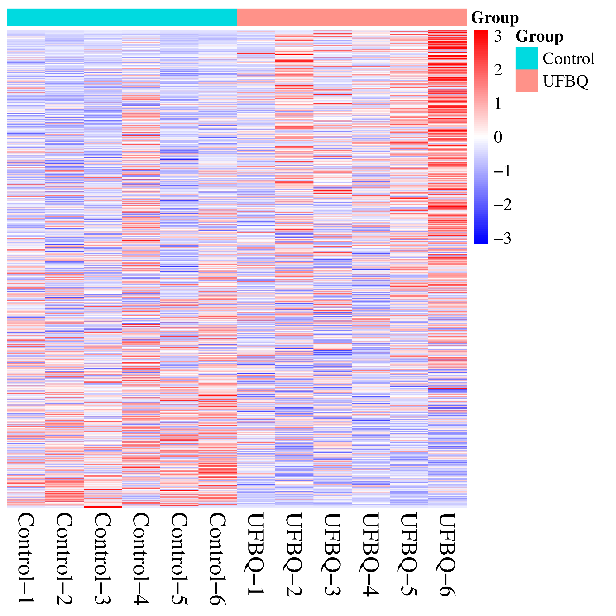


C D


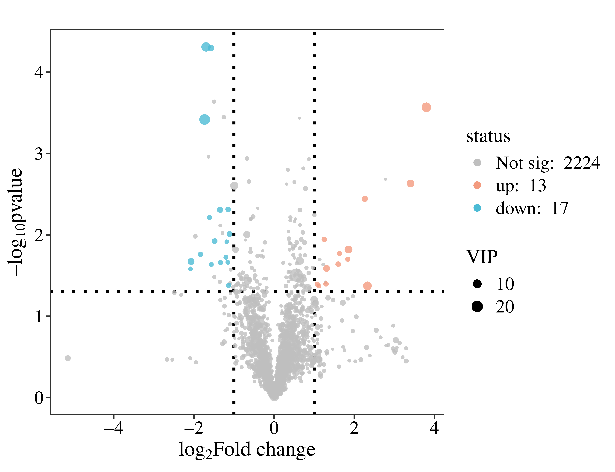

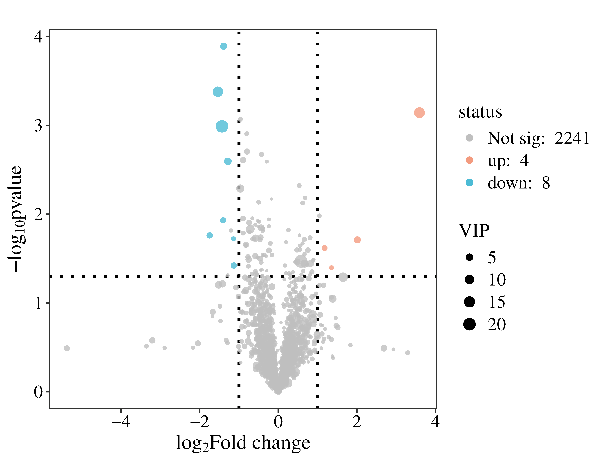


Supplementary Fig. 1. Heatmaps and volcano plots of differential metabolites.(A) Metabolite heatmap (BS vs. Control); (B) Metabolite heatmap (UFBQ vs. Control); (C) Metabolite volcano plot (BS vs. Control); (D) Metabolite volcano plot (UFBQ vs. Control).
