# Supplementary material for: The Effects of Fermented Chinese Herbal Medicine on Growth Performance, Immunity, Intestinal Microbiota, and Intestinal Metabolite Profile of Broiler Chicks
Source: Research Square preprint supplement (doi:10.21203/rs.3.rs-7238260/v1), 2025-08-12
Supplement: Supplementary file 2 [file c51d9704a05951f7a5f7bbdc.xlsx]

## Sheet: Sheet1
ID	m/z	rt(s)	Name	adduct	HMDB	KEGG	SuperClass	Class	SubClass	Control1	Control2	Control3	Control4	Control5	Control6	BS1	BS2	BS3	BS4	BS5	BS6	UFBQ1	UFBQ2	UFBQ3	UFBQ4	UFBQ5	UFBQ6	FBQ1	FBQ2	FBQ3	FBQ4	FBQ5	FBQ6	QC-1	QC-2	QC-3	QC-4
M558T185	558.314	185.327	alpha.-ergocryptine	[M+H-H2O]+		C07545	Alkaloids and derivatives	Ergoline and derivatives	Lysergic acids and derivatives	45794.2	55265.6	43808	79847.3	63974.3	50319.1	40674	29581.3	68317.4	28936	74469.9	62317.1	36536.8	42270.4	55028.9	32266.7	44600	30971.8	46719.1	39342.7	28273.3	32376.1	51103.8	47650.8	45634.8	50490	43939.3	43869.7
M196T54	196.096	53.616	alpha.-methyl-l-tyrosine	[M+H]+		C07921				267563	241947	205365	130963	231940	260155	164834	352649	113900	327698	246227	70982.6	240800	135811	140931	218218	194440	123713	87354.1	226496	155260	153001	103847	275655	286756	276836	262402	280505
M473T33	473.396	33.2065	alpha.-tocopheryl acetate	[M+H]+			Lipids and lipid-like molecules	Prenol lipids	Quinone and hydroquinone lipids	108074	100307	211301	102285	122268	36440.7	100560	86926	73197	62739.9	133169	68879	150753	83224	44670.8	85010.6	96090.7	31030.3	80639.7	58574.4	114666	65151.1	81903.4	59960.3	74236.2	79662.2	77912.3	79614.2
M469T179	469.409	179.018	beta.-amyrin acetate	[M+H]+			Lipids and lipid-like molecules	Prenol lipids	Triterpenoids	84823.8	61210	89652.5	124723	9447.83	59363.9	76234.1	104428	80738.6	59462.2	81036.7	66865.3	80443.1	136221	95938.2	11817.9	12515.5	104227	121312	71487.9	85125.3	80673.4	104505	76433.5	91375.8	92129.2	95686.4	88294.1
M137T48	137.095	48.165	beta.-damascone	[M+H-C4H8]+	HMDB0032541		Organic oxygen compounds	Organooxygen compounds	Carbonyl compounds	201352	129994	148171	175703	135879	208978	174642	393606	148128	170682	310071	123129	166866	143670	99571	245349	141316	138209	167768	205732	180561	142906	265191	145420	210424	212826	242910	233017
M463T270	463.312	270.295	beta.-ecdysone	[M+H-H2O]+	HMDB0030180	C02633	Lipids and lipid-like molecules	Steroids and steroid derivatives	Bile acids, alcohols and derivatives	11248.6	15596.3	24678	19366.7	18537.2	22102.3	37957.1	20729.1	22392.9	19356.2	24626.2	26612.8	24913.6	30315.2	13006.6	22953.6	25770.6	28806.5	29299.8	29078.6	20044.7	20073.3	26668.2	21026.6	32462.5	33286.4	32400.5	35053.8
M359T426	359.179	426.458	beta.-estradiol 3-benzoate	[M+H-H2O]+		C13444	Lipids and lipid-like molecules	Steroids and steroid derivatives	Estrane steroids	135054	186277	187009	215295	205693	171334	195574	145688	194862	95373.1	227969	239285	230494	64253.1	180377	228377	185516	101918	130375	139523	189359	77515.4	165029	158585	204298	242687	242890	242863
M402T527	402.279	527.289	beta.-estradiol 3,17-dipropionate	[M+NH4]+		C13077	Lipids and lipid-like molecules	Steroids and steroid derivatives	Steroid esters	11005.7	8954.36	5526.8	13631.9	15224.9	12111	10649	18221.4	2241.18	15409.8	8347.8	6268.49	3671.15	13669.1	6026.22	5373.84	13478.1	50810.4	10869	26702.9	10540.7	14314.7	17367.6	32110.6	24896.9	24900	25841.8	25240.7
M130T38	130.064	38.222	beta.-homoproline	[M+H]+						68281	57376	41683.5	59611.6	52975.8	61915.9	48472.3	31486.6	88253.5	54313.4	58217	33705.2	41863.2	58399.4	37316.7	45945.4	50844.7	33057.3	47915	35910.1	55767.5	53545	61466.1	45115.8	51477.2	56651.9	56679.5	55140
M411T218	411.319	218.268	beta.-tocotrienol	[M+H]+		C14154	Lipids and lipid-like molecules	Prenol lipids	Quinone and hydroquinone lipids	25674.7	23269.9	16294.4	30827.2	15678.2	18261.9	20305.9	11267.7	15456.7	13520.2	25282.5	21199	21999.6	19581.9	19631.2	20043.6	19343.2	18405.1	17502.8	18920.9	15263.8	35357.3	18748.7	17654.6	33754.2	28627.8	25878.6	25957.8
M104T364_2	104.07	364.384	gamma.-aminobutyric acid	[M+H]+	HMDB0000112	C00334	Organic acids and derivatives	Carboxylic acids and derivatives	Amino acids, peptides, and analogues	182856	230142	114682	163421	91146.2	140611	176526	115115	78712	111318	110290	80644.4	136768	107795	100207	87197.7	91933.8	77632.8	92930.2	248458	99325.3	166126	277694	153039	150688	153637	152604	158128
M129T351	129.101	351.375	gamma.-heptalactone	[M+H]+	HMDB0031681		Organoheterocyclic compounds	Lactones	Gamma butyrolactones	21404	12850.1	19482.1	9651.77	14725.7	19379.4	16808.9	16854.9	16620.6	34062.4	18690.5	16599.8	14339.4	14091.8	12376.4	17567.1	27158.8	32169.7	29050.1	23386.4	14986.4	8910.78	21101.6	15970.6	18534.5	18399.1	21098.9	18176.4
M293T323	293.184	322.943	gamma.-L-Glu-.epsilon.-L-Lys	(M+NH4)+						58984.2	43961.5	43428.7	83795.9	57977.9	49707.9	52006.9	55759.7	51125.8	49590.6	62096.9	46808.6	50089	47083.2	55348	46301.9	44154.3	51860	60021.5	54160.9	49798.9	65472	51384.1	48938	59310.1	59351.9	57768.2	53552.6
M391T258	391.268	258.442	gamma.-muricholic acid	[M+H-H2O]+		C17649	Lipids and lipid-like molecules	Steroids and steroid derivatives	Bile acids, alcohols and derivatives	98178.5	90822.3	88502.5	111912	103711	96935.3	86587.3	48961.1	99981.7	89528	89938.5	93344.9	11698.7	104698	109919	16530.6	102022	94843.9	77947.6	99454.5	16387.9	84131.9	97678.6	82614.9	80925	78180.8	81534.6	81529.2
M196T172	196.11	172.346	(-)-.alpha.-kainic acid	[M+H-H2O]+	HMDB0001431	C12819	Organic acids and derivatives	Carboxylic acids and derivatives	Amino acids, peptides, and analogues	36421.6	53148.2	49375	44642	18319.8	36796.4	38968.7	27813.1	27047	46085.5	22218.1	38868.2	25017.6	31427.4	59332.7	25424.2	21437.2	39935.3	46035.2	15652	54446.7	50922.1	38920.8	26839.9	50743.7	41882.5	41711	41670.9
M253T234	253.081	233.707	(-)-Medicarpin	(M+H-H2O)+						19363	21185.2	16378	20043.6	17639.2	20614.9	21741.4	24423.6	14883.5	21666.5	19699.3	21652.8	18316.9	20527.3	19352.6	15715	2789	3038.1	29494.8	22081.2	17569.7	19949.7	18988.3	25832.9	17892	11998.2	18034.9	13899.4
M135T223_2	135.116	222.834	(-)-myrtenol	[M+H-H2O]+	HMDB0035100		Lipids and lipid-like molecules	Prenol lipids	Monoterpenoids	138433	77794.6	102690	172655	127850	130996	101579	115450	102878	111735	109182	110946	131754	115940	123557	120127	140911	129548	140694	115718	124631	123868	132196	86134.5	147048	151187	147035	148287
M254T179	254.128	179.239	(-)-n6-(2-phenylisopropyl)adenosine	[M+H-C5H8O4]+						180516	217354	142381	76545.6	202342	242496	138933	55900.3	94101.1	74738.4	93881.4	144717	93624.3	90983.2	101568	33719	58159.3	102154	68856.9	161794	136677	101587	179112	46265.7	144048	143605	143605	166503
M377T201	377.144	201.144	(-)-riboflavin	[M+H]+	HMDB0000244	C00255	Organoheterocyclic compounds	Pteridines and derivatives	Alloxazines and isoalloxazines	160542	168712	153608	144711	109745	175809	129482	127290	152233	170211	109784	160601	79286.2	137846	107001	149147	169587	187868	185914	221763	121873	200268	152888	150126	218174	221259	218174	218938
M332T359_2	332.179	358.91	(-)-trans-4-[4-(4'-fluorophenyl)-3-piperidinylmethoxy]-2-methoxyphenol	[M+H]+			Organoheterocyclic compounds	Piperidines	Phenylpiperidines	20573.4	18743	20822.6	13640.3	40715.6	24019.2	19929.8	20357.8	24926.9	17276.5	10345.2	26580.7	18029.2	16046	18818.3	15712.1	27048.9	44493.1	23709.9	37934.3	27447.6	29571.7	26254.9	24706.5	21200.4	21146.3	21144.4	23233.5
M454T397	454.219	396.812	(-)-Tylocrebrine	(M+CH3COO+2H)+						9310.09	9874.68	38396.2	34411.6	19738.7	13170	26655.2	18802.7	25360	27253	10854.3	25888	25692.3	31286.5	27416.1	25874.2	28522.8	27345.1	34375.3	28085.4	15447.5	30292.4	22609.7	11743	30591	31268.6	30595	30594.3
M248T286	248.147	286.075	(.+/-.)-ethylphenidate	[M+H]+			Organic nitrogen compounds	Organonitrogen compounds	Amines	26386.5	14820.3	21621.1	33216.7	21078.9	12423.9	29173.9	15062.7	17070.3	69920.5	19762.3	60901	25100.6	17390	23352.3	28850.7	25065.4	114369	39998.4	20477.5	22236.5	27534.6	25265.1	29902.6	27646	31378.5	30124.1	36429.5
M585T406	585.245	405.523	(1r,3ar,3bs,4ar,6s,7s,7ar,8r,8ar,9ar)-1,4a,8-tris(acetyloxy)-2,2,3b,6,8a-pentamethyl-4,9-dioxo-tetradecahydro-1h-cyclopenta[a]s-indacen-7-yl butanoate	[M+Na]+			Lipids and lipid-like molecules	Prenol lipids	Diterpenoids	11507.5	6869.87	13664.9	15052.3	12106.4	12584.6	9128.07	11722.2	7184.57	11673.7	8303.23	14523.3	12098.6	13713.5	10290.6	12335.7	12526	10364.1	14472	13245.7	9609.19	11387.4	14177.4	10044.6	10992.9	11584.2	8701.42	11560.7
M169T38	169.122	38.026	(1r)-chrysanthemolactone	[M+H]+						1.36601e+06	1.21204e+06	789062	1.8424e+06	1.53295e+06	1.49502e+06	1.42569e+06	1.48605e+06	1.13857e+06	1.29975e+06	1.0995e+06	746599	1.15664e+06	954935	1.47971e+06	645267	876327	1.12522e+06	1.15246e+06	1.51567e+06	1.5512e+06	1.43489e+06	1.26804e+06	1.69705e+06	1.36484e+06	1.37357e+06	1.36224e+06	1.37359e+06
M190T143	190.158	143.066	(1s,2r)-2-(diethylamino)-1-phenyl-1-propanol	[M+H-H2O]+			Benzenoids	Benzene and substituted derivatives	Phenylpropanes	42644.3	43338	13941.2	39539.6	10739.5	31621.5	36425.3	35544.4	32955.4	30863.2	33783.7	23393.9	29906.1	40940.9	49579.5	15889.3	11208.9	38001.1	45773	18093.3	41107	38184.4	34705	21473.6	26440.6	34158.9	33379.7	34192.6
M113T122	113.07	121.719	(2e,4e)-hexa-2,4-dienoic acid	[M+H]+	HMDB0029581		Lipids and lipid-like molecules	Fatty Acyls	Fatty acids and conjugates	325958	390772	258697	342859	305621	362412	276790	311438	415758	379045	340540	286010	234961	396659	244950	274003	250730	250600	196485	274020	271107	226601	219409	328923	315229	315373	322550	338479
M512T439	512.243	439.232	(2e,6e,11e,13e)-18-(2,6-dioxopiperidin-4-yl)-9-hydroxy-8-methoxy-10,12,14-trimethyl-15-oxooctadeca-2,6,11,13-tetraenoic acid	[M+Na]+			Lipids and lipid-like molecules	Fatty Acyls	Lineolic acids and derivatives	102158	39735.1	149028	112746	101955	41211.1	47444.5	48497.7	44849.4	28078.4	44158.4	35360	117648	43867.4	26459.8	40558.7	45247.4	36102.6	47900.4	31035.7	24961	25408.7	28005.6	29844.4	49567.2	49843.6	63617.9	49795.7
M631T513	631.289	513.18	(2r,3r,4r,5r,6s)-2-[[(2r,3s,4s,5r,6r)-6-[1,7-bis(4-hydroxyphenyl)heptan-3-yloxy]-3,4,5-trihydroxyoxan-2-yl]methoxy]-6-methyloxane-3,4,5-triol	[M+Na]+			Phenylpropanoids and polyketides	Diarylheptanoids	Linear diarylheptanoids	17686.2	9116.02	13457.5	34872.8	11540.8	11861.2	13901.4	6602.85	19352.4	17199	12321.9	16077.3	12736.4	33372.4	12774.9	8934.9	24709.8	30830.3	36695.5	29057.4	20455.2	29877.7	20908.9	32181	22054.7	22057.1	22444.5	22056.3
M262T299	262.179	299.168	(2r)-3-hydroxyisovaleroylcarnitine	[M+H]+			Lipids and lipid-like molecules	Fatty Acyls	Fatty acid esters	29163.8	45153	29101.8	27537.9	31686.6	33513.7	19457.6	33539.9	34889.5	22991.8	28420.4	27312.3	27885.1	34152.7	42040.2	27139.9	55657.3	46336.9	32812.1	27330	40927.4	31908.7	32184.4	26027.9	39225.5	38893.5	45751.9	38757.9
M517T484	517.33	484.466	(2s,3r,5r,10r,13r,14s,17s)-2,3,14-trihydroxy-10,13-dimethyl-17-[(2r,3r,5r)-2,3,6-trihydroxy-5,6-dimethylheptan-2-yl]-2,3,4,5,9,11,12,15,16,17-decahydro-1h-cyclopenta[a]phenanthren-6-one	[M+Na]+			Lipids and lipid-like molecules	Steroids and steroid derivatives	Bile acids, alcohols and derivatives	10418.8	9027.48	11448.6	5865.5	10663.1	13246.2	3591.01	14487.9	1067.33	10050.7	2342.87	3191.37	8462.17	3213.09	3689.61	9334.91	1860.15	16804.6	1480.34	6293.54	4282.36	2529.46	6635.45	6721.07	8768.36	10302.1	9246.88	12599.9
M1142T476	1141.53	476.455	(2s,3s,4s,5r,6r)-6-[[(3s,6ar,6bs,8as,14br)-4,4,6a,6b,11,11,14b-heptamethyl-8a-[(2s,3r,4s,5s,6r)-3,4,5-trihydroxy-6-(hydroxymethyl)oxan-2-yl]oxycarbonyl-1,2,3,4a,5,6,7,8,9,10,12,12a,14,14a-tetradecahydropicen-3-yl]oxy]-4-hydroxy-3,5-bis[[(2s,3r,4s,5s,6r)-3,4,5-trihydroxy-6-(hydroxymethyl)oxan-2-yl]oxy]oxane-2-carboxylic acid	[M+Na]+			Lipids and lipid-like molecules	Prenol lipids	Terpene glycosides	3967.86	3161.21	3231.53	6224.53	3153	4522.75	5605.78	4717.07	3140.12	4034.22	3405.56	3465	3726.08	5563.28	3608.32	3626.14	4851.1	7508.59	6661.57	5007.71	3833.61	6959.74	4984.6	11437.6	6418.86	6541.16	6452.9	6418.26
M133T155	133.064	154.597	(2s,3s)-(-)-3-phenylglycidol	[M+H-H2O]+						10651.6	9558.78	11902.8	10181.5	10775.9	9220.88	9945.8	9757.19	6510.57	9892.46	11739.2	11443	11953.7	13878.6	8440.36	7772.08	8756.08	12714.5	13082.4	10590.3	10802.3	10639.4	12807.5	8715.56	13556.4	13174.8	12811.9	12798.3
M357T361	357.248	361.259	(2s)-nicotine 1-oxide	[2M+H]+			Organoheterocyclic compounds	Pyridines and derivatives	Pyrrolidinylpyridines	20595.7	27431.8	58423.6	57731	57457.8	46179.5	14417	20790.4	62849.2	9921.98	65400.6	12043.7	53253.1	68716.4	6806.37	13440.3	17406.4	50690.8	18783.7	24809.9	18710	50606.6	22761	23957.7	44580.9	33353.8	44603.6	31932.9
M419T392	419.287	392.195	(2z)-2-[(e)-6-(hydroxymethyl)-2,4,8,10-tetramethyldodec-2-enylidene]-4-methylpentanedioic acid	[M+Na]+			Lipids and lipid-like molecules	Prenol lipids	Diterpenoids	42341.4	52293.6	34381.5	43439.2	28179	29617	30708.2	10640.8	11846.7	31988.3	33389.2	34133.4	23056.8	49987.7	13842.4	39052.7	41893.7	52685.4	45259.1	41640.6	33598.7	23845.4	29045.5	19159.3	50631.6	42318.4	50620.7	50617.6
M146T297	146.117	297.279	(3-Carboxypropyl)trimethylammonium cation	M+						61340.8	18404.7	23360.5	47082.3	26776.9	22426.5	13964	47558.8	14642.3	42367.2	21591.1	16860.3	16799.2	10588.9	22794.1	21623.5	70469.4	8389.88	52905.2	1332.7	35878.5	52281.2	15358.4	44889.5	27786.8	17424.8	27765.9	23613
M571T274	571.307	274.221	(3r,5r,6r,7s,9s,10r,13r,17r)-17-((r)-5-methoxy-5-oxopentan-2-yl)-10,13-dimethylhexadecahydro-1h-cyclopenta[a]phenanthrene-3,6,7-triyl triacetate	[M+Na]+			Lipids and lipid-like molecules	Steroids and steroid derivatives	Bile acids, alcohols and derivatives	9638.74	10117.8	12085	11849.6	7338.67	11155.6	11691.1	14353.7	12345.2	13983.7	7716.88	12825.5	8028	14778.9	13760.9	12505	13860.1	24559.5	20610.9	10524.1	11426.2	18228.7	16480.8	14224.6	25186	25190.1	25178.3	26828.1
M601T455	601.194	454.613	(3s,4s)-5-[(3s,4s)-4,10-dihydroxy-7,9-dimethoxy-3-methyl-3,4-dihydro-1h-benzo[g]isochromen-5-yl]-7,9-dimethoxy-3-methyl-3,4-dihydro-1h-benzo[g]isochromene-4,10-diol	[M+Na]+						9695.73	22071.7	18747.5	9049.79	11285.6	17646.8	11757.7	8213.48	11418.6	15155.4	13138	25940.6	7177.91	5616.08	14806.6	18672.7	7321.89	11075.7	14469.8	10948.3	6399.01	11854.2	11663.7	11648.6	9035.99	8671.3	8126.72	8318.94
M641T460	641.189	459.796	(3z)-5-[(2,6-dichlorobenzyl)sulfonyl]-3-[(3,5-dimethyl-4-{[(2r)-2-(1-pyrrolidinylmethyl)-1-pyrrolidinyl]carbonyl}-1h-pyrrol-2-yl)methylene]-1,3-dihydro-2h-indol-2-one	[M+H]+			Organoheterocyclic compounds	Indoles and derivatives	Indolines	5074.49	5923.86	1.17946e+06	28371.1	9776.61	11225.8	3499.22	5090.33	4588.17	5198.68	4886.84	6543.99	7024.73	5512.39	5661.62	7228.88	3051.87	6659.89	3048.1	5786.54	5573.42	6988.93	1976.08	7035.06	18617.4	20561.7	19035.6	18616.8
M317T226	317.184	225.681	(5r)-5-hydroxy-1-(4-hydroxy-3-methoxyphenyl)decan-3-one	[M+Na]+			Benzenoids	Phenols	Methoxyphenols	58954.6	58862.1	59820.8	39300.5	44366.7	67960.9	87122.8	50714.7	61871.9	42641.5	74074.5	49743.9	50369.6	59847.8	87666.2	36471.1	41257.6	46932.4	34839.2	48443	53092.6	33770	41377.9	40558.4	59716.6	64893.1	57954.2	57770.5
M419T68	419.188	68.024	(e)-3-(4-methoxyphenyl)-1-[2,4,6-trimethoxy-3-(3-methylbut-2-enyl)phenyl]prop-2-en-1-one	[M+Na]+			Phenylpropanoids and polyketides	Linear 1,3-diarylpropanoids	Chalcones and dihydrochalcones	71974.9	87770.6	95080	113031	59970.5	74722	33540	68962.9	75917.2	73848.6	58774.2	172683	74899.9	77811.3	82786.8	29509.1	71019	27306.1	83167.9	165581	17107.6	73542.8	75391.4	75733.8	56938.5	21733.7	56308.6	47031.6
M385T209	385.186	208.968	(e)-8-(4-hydroxy-6-methoxy-7-methyl-3-oxo-1h-2-benzofuran-5-yl)-2,6-dimethyloct-6-enoic acid	[M+Na]+			Organoheterocyclic compounds	Isocoumarans	Isobenzofuranones	28391.6	40138.6	31952.6	36257.3	17053.3	48908.2	54395.9	38103.2	31058.8	62257.3	24919.4	52148.6	36928.8	35722.2	31106.1	44177.4	21048.9	43413.5	43813.1	31949.6	24877.1	32542.1	49000.4	29749.1	55535.8	54058.4	53802.5	55512.4
M362T58	362.325	58.182	(r)-(+)-arachidonyl-1'-hydroxy-2'-propylamide	[M+H]+			Lipids and lipid-like molecules	Fatty Acyls	Fatty amides	453322	474892	494140	446419	602100	488136	569562	494194	470326	473990	449260	296745	438995	550590	311566	435990	452923	383512	419549	404707	504076	419763	495140	618207	502601	501515	504794	509400
M481T281	481.361	280.594	(r)-aminocarnitine	[3M+H]+			Organic acids and derivatives	Carboxylic acids and derivatives	Amino acids, peptides, and analogues	28220.2	28992.2	27636.9	40252.8	25662.3	26861.1	33775.9	24714.5	28260.1	18500.4	32202.1	27507.9	27312.7	29646.2	31623	22903.6	28917.8	40759.6	33635.1	28636.4	27668.1	19580.2	29274	26293.3	43847.5	43847	43847.2	42918.6
M281T332_1	281.184	331.975	(r)-lisofylline	[M+H]+			Organoheterocyclic compounds	Imidazopyrimidines	Purines and purine derivatives	52746	50857.1	37663.7	71689.1	49044.1	44540.9	43287.2	45078.7	74483.9	63018.8	93554.3	59066.8	75654.8	14510.9	78582.4	64875.6	75804.3	53063.6	61073.3	54877.6	65484.7	42394.6	71777.2	59037.9	56350.8	53347.2	54035.2	53347.1
M193T290	193.096	289.69	(s)-cotinine n-oxide	[M+H]+	HMDB0001411		Organoheterocyclic compounds	Pyridines and derivatives	Pyrrolidinylpyridines	53720.9	51197.7	55223.2	67541.3	44512.6	51596.4	66534.6	54614.6	45066.7	50183.4	54483.1	54923.8	47630.8	55552.6	52783.8	47241.1	48156.9	65500.2	62025.9	45216.3	60816.8	47961.6	63833.2	42222.3	64064.7	64545.4	63107.2	63805.5
M393T520	393.213	519.909	(s)-n-(1-amino-3-methyl-1-oxobutan-2-yl)-1-(5-fluoropentyl)-3-(4-fluorophenyl)-1h-pyrazole-5-carboxamide	[M+H]+			Organoheterocyclic compounds	Azoles	Pyrazoles	19617.4	31622.9	15290.4	9491.47	22716	20603.9	18371.4	14930	28296.2	19677.4	33824.4	22253.4	16029.5	14546.4	18365	24770.3	9493.34	29109.7	20454.5	28999.9	19626.1	19230.4	18329.7	16631.7	30078.1	30939.3	32263.6	32299.5
M162T181_2	162.111	181.136	(s)-n-nitrosoanabasine	[M+H-ON]+						128098	147494	119557	121794	121552	130488	96246.4	114378	96490.8	87540.2	119369	144713	108298	96190.2	152351	119039	102003	86779	89179.7	67631.2	94661	77495.3	137693	66095.8	105088	107480	108445	108435
M347T429	347.144	428.522	[(1r,5s,6s)-5-acetyloxy-3-(hydroxymethyl)-2-oxo-6-propan-2-ylcyclohex-3-en-1-yl] (e)-2-methylbut-2-enoate	[M+Na]+			Lipids and lipid-like molecules	Prenol lipids	Monoterpenoids	32708	28007.8	23077.1	29772.6	24810.3	32738	27248.9	48884.7	30537.4	55395.3	30208.6	34785.1	26996	31726.1	25121.7	25155.2	34893	26465.1	37325.4	40165.1	23174.4	41911.6	33679.8	21383.7	38350.4	38595.8	38350	40918.2
M449T282	449.297	282.084	[(2e,6z,10z)-7,11-bis(acetyloxymethyl)-3,15-dimethylhexadeca-2,6,10,14-tetraenyl] acetate	[M+H]+			Lipids and lipid-like molecules	Prenol lipids	Diterpenoids	16603	12274.9	19753.4	33945	25054.8	18730.2	25219.7	19254.5	14164.7	18367.4	22662.8	20026.9	26660.4	21306	22498.7	17805.8	25536.4	34521.2	29829.6	21778.2	19880.1	12631.4	23810.7	19803.1	36864.2	40675.3	42054.7	41968.2
M906T82	906.328	82.0265	[(2r,3r,4r,5r,6r)-2-[[(2r,3r,4r)-3,4-dihydroxy-4-(hydroxymethyl)oxolan-2-yl]oxymethyl]-4-[(2s,3r,4r,5r,6s)-4,5-dihydroxy-6-methyl-3-[(2s,3r,4s,5s)-3,4,5-trihydroxyoxan-2-yl]oxyoxan-2-yl]oxy-6-[2-(3,4-dihydroxyphenyl)ethoxy]-5-hydroxyoxan-3-yl] (e)-3-(3,4-dihydroxyphenyl)prop-2-enoate	[M+NH4]+			Organic oxygen compounds	Organooxygen compounds	Carbohydrates and carbohydrate conjugates	7804.19	7066.96	8787.04	17834.8	7175.9	8102.39	6306.79	9083.63	6671.06	7192.26	7508.89	9773.13	7100.64	13767.7	9423	7267.08	9756.58	11535.8	34915.2	10298.8	7507.85	19413	11652	15454.9	11182	11180.5	11539.8	11277.3
M687T361	687.334	361.253	[(2r,3r,4s,5s,6r)-3-acetyloxy-2-(acetyloxymethyl)-5-butanoyloxy-6-[(2s,3r)-2,3,4-trihydroxybutoxy]oxan-4-yl] 14-hydroxytetradecanoate	[M+Na]+						23529.4	27053.8	20179	28209.8	38094.6	25937.5	26667.5	29912.3	28805.8	15073.2	21724.3	37374.4	18898.4	26249.7	22649.9	29536.3	27914.5	34669.6	29274.6	32091.8	14347.9	10349.8	27907.2	29018.9	30507.8	30504.2	31357.6	30775.7
M689T338	689.242	337.812	[(2r,3s,4s,5r,6r)-6-[1,7-bis(4-hydroxyphenyl)-5-oxoheptan-3-yl]oxy-3,4,5-trihydroxyoxan-2-yl]methyl (e)-3-(3,4-dimethoxyphenyl)prop-2-enoate	[M+Na]+			Phenylpropanoids and polyketides	Diarylheptanoids	Linear diarylheptanoids	5007.56	4254.99	5068.73	5901.71	3992.69	4329.16	4635.68	3886.28	3781.32	5251.39	8953.55	3532.14	3593.73	5951.74	2890.54	6775.29	4584.89	8338.59	7063.8	3259.94	2832.08	4523.27	5926.33	5929.99	6437.99	5667.58	5687.63	5652
M935T175	935.498	175.405	[17-acetyl-3-[5-[5-(3,5-dihydroxy-4-methoxy-6-methyloxan-2-yl)oxy-4-methoxy-6-methyloxan-2-yl]oxy-4-methoxy-6-methyloxan-2-yl]oxy-8,14,17-trihydroxy-10,13-dimethyl-1,2,3,4,5,6,7,9,11,12,15,16-dodecahydrocyclopenta[a]phenanthren-12-yl] benzoate	[M+H]+			Lipids and lipid-like molecules	Steroids and steroid derivatives	Steroidal glycosides	18947.5	10462	29521.6	42084.6	20440.3	14513.9	12549.4	16714.5	11363.7	9629.26	28542.2	20903.2	18460.1	13505.4	29380.3	11278.9	29270.5	14830.9	12738	24637.8	8574.38	14461	17349.8	27933.2	14159.8	11537.7	11993.5	12202.3
M1120T478	1119.55	477.702	[17-acetyl-8,14,17-trihydroxy-3-[5-[5-[3-hydroxy-4-methoxy-6-methyl-5-[3,4,5-trihydroxy-6-(hydroxymethyl)oxan-2-yl]oxyoxan-2-yl]oxy-4-methoxy-6-methyloxan-2-yl]oxy-4-methoxy-6-methyloxan-2-yl]oxy-10,13-dimethyl-1,2,3,4,5,6,7,9,11,12,15,16-dodecahydrocyclopenta[a]phenanthren-12-yl] benzoate	[M+Na]+			Lipids and lipid-like molecules	Steroids and steroid derivatives	Steroidal glycosides	2703.31	2403.05	2178.47	2435.13	2204.18	3696.46	5597.93	4153.5	2025.46	3565.76	2257.6	2798.33	2882.65	1420.59	3127.76	3083.06	1797.75	5584.82	5393.11	2316	3132.79	4368.32	3303.57	2720.58	2605.61	3524.27	2599.78	2655.23
M277T183	277.19	182.965	[6]-gingerol	[M+H-H2O]+		C10462	Benzenoids	Phenols	Methoxyphenols	36027	39737.6	29092.1	41068.6	30716.4	34672.7	33096	39188.7	42745.3	29832.8	34157.3	24622.2	42190.2	42453.2	38737.6	24143.4	37717.8	36582.7	40031.5	32878.6	27392.5	34608.6	34406.8	28169.9	54270.2	48221.1	48214.7	48274.2
M519T246	519.26	246.147	1-(10z-heptadecenoyl)-sn-glycero-3-phospho-(1'-rac-glycerol)	[M+Na]+						17977.8	20153.9	11190.4	18857.2	16563.7	8005.07	11905.8	16156.4	16629	23359.9	16153.3	23328.3	13895.3	18946.3	15973.3	15252.4	17241.6	16484	20027	22163.9	14507.7	19598	17962.3	16451.5	18309.6	18485.1	18310.7	18483.9
M480T175	480.342	175.383	1-(1z-hexadecenyl)-sn-glycero-3-phosphocholine	[M+H]+	HMDB0010407		Lipids and lipid-like molecules	Glycerophospholipids	Glycerophosphocholines	27620.1	20014.1	26352.2	28165.8	26966.3	20794.4	18740.9	17410.5	21311.4	15832.4	31842.9	30665.5	21923.1	48163.4	23390.4	50100.7	26088.2	100585	79192.8	57988	19873.5	37334.8	39970	29014.6	45219.7	45747.9	45746.6	45584.1
M819T599	818.619	599.401	1-(1z-octadecenyl)-2-(4z,7z,10z,13z,16z,19z-docosahexaenoyl)-sn-glycero-3-phosphocholine	[M+H]+	HMDB0011262		Lipids and lipid-like molecules	Glycerophospholipids	Glycerophosphocholines	1811.61	2157.54	2220.34	2076.13	1976.65	2180.13	1617.05	2172.81	1922.7	2121.89	2237.05	1888.44	2108.38	1982.65	2368.03	1724.26	2161.6	1958.83	2115.65	2529.09	1230.62	1672.16	2390.4	2373.01	1865.86	2226.04	2144.23	2264.69
M795T78	794.601	78.469	1-(1z-octadecenyl)-2-(5z,8z,11z,14z-eicosatetraenoyl)-sn-glycero-3-phosphocholine	[M+H]+	HMDB0011253		Lipids and lipid-like molecules	Glycerophospholipids	Glycerophosphocholines	12436	37425.5	119822	119929	15398.2	12253.3	11458.1	9195.37	17280.9	21194.7	27078.8	13881.1	10208.8	42176.6	11218.4	185462	32381.5	1.14129e+06	15941	35305.1	39992.9	14448.8	225262	49700.9	90069.3	99617.7	96932.6	104779
M753T90	752.554	89.587	1-(1z-octadecenyl)-2-(5z,8z,11z,14z-eicosatetraenoyl)-sn-glycero-3-phosphoethanolamine	[M+H]+	HMDB0005779		Lipids and lipid-like molecules	Glycerophospholipids	Glycerophosphoethanolamines	29932.9	130559	183807	35526.5	28289.6	39685.2	31589.8	17742.1	23839.7	40852	23374.8	22767.8	32621.6	115232	41472.5	190630	31380.8	254445	17725.3	24296	23543.5	19779.9	203054	106502	60029.7	67189.7	50749.9	56395.6
M773T93	772.615	92.929	1-(1z-octadecenyl)-2-(9z-octadecenoyl)-sn-glycero-3-phosphocholine	[M+H]+	HMDB0011243		Lipids and lipid-like molecules	Glycerophospholipids	Glycerophosphocholines	18284.9	30928.5	91151.3	47243.5	26193.9	28735.2	26918.4	18237.2	33970.3	60893.3	40342.8	45393.1	25102.9	114005	40586.7	229772	69085.5	1.20146e+06	17253.8	449227	59040.3	28708.3	403278	74605.6	148723	153442	156204	158063
M508T172	508.372	171.823	1-(1z-octadecenyl)-sn-glycero-3-phosphocholine	[M+H]+	HMDB0013122		Lipids and lipid-like molecules	Glycerophospholipids	Glycerophosphocholines	33592.5	91615	82060	41452.7	27912	21153.5	36966.9	53085.6	72261.4	23055	39256.5	97769	16103.5	127969	63496	69188.8	62088.5	291115	86716.6	105528	33980	64224.6	107868	45496.8	132499	146376	132757	142409
M193T237	193.133	237.22	1-(4-isopropylphenyl)-3-methylurea	[M+H]+			Benzenoids	Benzene and substituted derivatives	N-phenylureas	943522	1.33132e+06	1.05716e+06	1.06591e+06	579902	798763	1.13159e+06	808653	634460	896248	929315	1.21494e+06	744032	915877	1.5652e+06	1.00104e+06	813815	1.06567e+06	1.0058e+06	487294	1.10126e+06	646464	825041	432293	1.19679e+06	1.17162e+06	1.18125e+06	1.10264e+06
M217T328	217.154	328.125	1-(4-piperidinyl)-1,3-dihydro-2h-indol-2-one	[M+H]+			Organoheterocyclic compounds	Indoles and derivatives	N-alkylindoles	172029	165824	127320	70285.5	146412	150799	159810	94559.6	228964	125349	159212	174293	135141	84499.7	165952	129819	100353	56415.6	48178.3	135111	149639	38392.8	88037.5	41156.9	120907	120403	120635	119859
M178T190	178.134	189.587	1-(4-pyridinyl)-4-piperidinamine	[M+H]+			Organic nitrogen compounds	Organonitrogen compounds	Amines	5479.83	9211.13	8461.06	5871.48	6106.24	6104.79	5001.16	6241.31	8469.13	10770.4	7670.03	5707.98	6028.54	9594.33	8324.51	4239.86	15705.9	7709.57	11513.3	5862.57	5624.88	10899.4	27165.7	3092.65	8277.53	9899.56	9900.56	9723.39
M285T513	285.227	513.336	1-[1-(1-methylcyclooctyl)-4-piperidinyl]-2-[(3r)-3-piperidinyl]-1h-benzimidazole	[M+H-C9H16]+						6177.06	5294.24	3114.03	3403.98	19167.7	15975.6	5607.81	6687.73	14820.1	16263.4	6337.32	7881.79	16423.4	33935.3	6896.15	16580.8	4913.9	6571.3	7215.93	7181.01	15283.6	2145.24	25135.2	12964	10430	13176.5	8139.33	23483.6
M143T278	143.117	278.102	1-acetyl-3-piperidinamine	[M+H]+			Organoheterocyclic compounds	Piperidines	N-acylpiperidines	16038.4	51248.7	15970.9	14493.2	18921.8	23457.5	31599.7	37290	12883.4	27226.8	15134.6	25477.4	10334.7	28832.8	16189.4	11668	25495.6	55418.6	28863.9	48375.8	26516.9	58022.1	30869.3	48347.7	35945.9	35676.3	35711.2	48579.7
M161T524	161.127	524.423	1-Aminocyclohexanecarboxylic acid	(M+NH4)+						82973.6	71799.3	67973.1	99060.4	68356.7	71993.8	74838	95644.1	68643.6	94126.5	84455.9	77791.1	72827.1	133877	85155.9	80095.9	93307.7	197564	115543	123201	88415.8	104022	105191	101516	206202	206213	213212	206619
M84T388_2	84.0441	387.691	1-Aminocyclopropanecarboxylic acid	(M+H-H2O)+	HMDB0036458	C01234	Organic acids and derivatives	Carboxylic acids and derivatives	"Amino acids, peptides, and analogues"	624806	631548	728875	487993	559651	731473	683436	525524	677710	809493	669904	639630	538489	702154	653302	706660	837604	909894	792011	820101	571520	700653	772199	513891	835472	839898	830129	830049
M552T179	552.397	178.753	1-arachidoyl-2-hydroxy-sn-glycero-3-phosphocholine	[M+H]+	HMDB0010390		Lipids and lipid-like molecules	Glycerophospholipids	Glycerophosphocholines	9535.17	8867.05	6454.79	9255.17	8095.29	9060.91	10962.4	6795.69	7914.35	5137.44	10163.1	8608.4	9187.64	7465.44	9314.95	7948.1	12578	25637.5	13809.8	16127.7	9226.37	5615.4	16906.7	3050.86	11730.4	12933.5	12251.8	11734.2
M580T83	580.446	83.377	1-behenoyl-2-hydroxy-sn-glycero-3-phosphocholine	[M+H]+	HMDB0010398		Lipids and lipid-like molecules	Glycerophospholipids	Glycerophosphocholines	13999.8	12160.5	14481.1	14908.2	22368.2	16887.8	19522.8	14402.4	17908	16625.4	16603.7	12964.7	14301.2	17402	13095.7	15951	18784.2	8030.63	19487.4	16036.3	19417	14889.4	13949.9	10230.6	12943	14334.9	13144.7	14364.1
M454T272	454.231	271.777	1-butanol, 2-[[9-(1-methylethyl)-6-[[[4-(2-pyridinyl)phenyl]methyl]amino]-9h-purin-2-yl]amino]-, (2r)-	[M+Na]+			Organoheterocyclic compounds	Pyridines and derivatives	Phenylpyridines	70920.6	50535.9	50282.8	55625.6	49235.6	49882.2	53098	51297.3	54296.2	48940.4	52409.6	48458.5	47686.2	54774.3	52345.2	221358	56440.8	61608.3	65896.3	59591.5	51017	41574.1	56388.7	51211.9	64621.6	65233.5	64620.8	68518
M450T329	450.213	328.707	1-decanoyl-2-hydroxy-sn-glycero-3-phosphocholine	[M+K]+			Lipids and lipid-like molecules	Glycerophospholipids	Glycerophosphocholines	24289.4	18376.8	28939.2	34452.2	32741.9	28338	23894.1	28954.9	32962.1	24653.1	31940.2	28752.2	29244.6	27061.8	22734.9	25109.2	23294.6	29095	14174.9	28970.9	26653.3	28697.7	29006.6	25181.2	20003.4	23005.1	21359.2	20049.6
M112T353	112.111	352.772	1-ethyl-3-piperidinamine	[M+H-NH3]+			Organoheterocyclic compounds	Piperidines	Aminopiperidines	7440.04	44556	15904.7	8618.7	26777.4	37682.6	23830.3	7510.25	27851.3	11778.2	19143.4	36733.8	22905.5	4746.83	18232.1	14266.2	9296.21	4091.23	7363.97	9735.26	24130.5	3388.49	10016.7	9272.93	16631.4	16552.2	16188.1	16589.2
M532T371	532.323	371.212	1-heptadecanoyl-sn-glycero-3-phosphocholine	[M+Na]+	HMDB0012108		Lipids and lipid-like molecules	Glycerophospholipids	Glycerophosphocholines	19620.7	16960.6	15980.3	20842.3	22564.9	16849.7	16930.7	18046.9	10304.7	16755.2	19968.8	20774.2	29264.4	23779.9	19487.3	17234.3	19559.9	22989.6	24876.5	18298	20859.1	25885.4	21696.7	21569.6	21266.1	20127.7	21439.8	21003.5
M290T249	290.21	249.126	1-heptanone, 1-(4-methoxyphenyl)-2-(1-pyrrolidinyl)-	[M+H]+			Organic oxygen compounds	Organooxygen compounds	Carbonyl compounds	96473	109342	110985	156865	90858.3	101622	155752	94861.1	94302.8	72974.1	113352	119653	98849.9	126983	113424	101690	114421	121901	144845	93384.3	100326	103372	139166	60466.2	141518	148957	148030	149014
M759T117	758.566	117.158	1-hexadecanoyl-2-octadecadienoyl-sn-glycero-3-phosphocholine	[M+H]+			Lipids and lipid-like molecules	Glycerophospholipids	Glycerophosphocholines	73347.5	131841	385749	334836	64760.5	117402	77008.9	35394.6	84792.3	253293	185601	266806	40704	344035	164590	1.40305e+06	236782	6.48972e+06	85964.3	780016	115356	78025.6	2.09864e+06	580394	804082	784632	784728	836149
M769T91	768.585	91.227	1-hexadecyl-2-(5z,8z,11z,14z-eicosatetraenoyl)-sn-glycero-3-phosphocholine	[M+H]+			Lipids and lipid-like molecules	Glycerophospholipids	Glycerophosphocholines	16615.5	32851.3	79727.5	603423	17452.4	12606.5	10640.2	9598.41	19370.4	9037.51	24276.6	9773.82	11034.1	44743.3	12121	286808	40688.3	1.29743e+06	7042.83	100483	23368	17402.8	244779	71875.6	72316	107136	117714	113175
M771T98	770.601	97.6225	1-hexadecyl-2-(8z,11z,14z-eicosatrienoyl)-sn-glycero-3-phosphocholine	[M+H]+			Lipids and lipid-like molecules	Glycerophospholipids	Glycerophosphocholines	25737.3	25126.7	248624	160627	60761.2	25941.4	52530.2	30063.9	25167.3	142010	35685.6	86983.5	48376.8	115620	60264.9	743764	58820.6	3.48134e+06	43078.2	97836.3	126531	69581.4	772675	209118	398299	397989	204918	394283
M482T189	482.357	189.239	1-hexadecyl-sn-glycero-3-phosphocholine	[M+H]+			Lipids and lipid-like molecules	Glycerophospholipids	Glycerophosphocholines	20143.7	23403	39309.1	189362	37725.7	13091.3	39486.1	51797.1	31126.5	25603.6	32153.3	108910	16390.9	182483	65644.8	92739.8	93272.1	195892	198020	164876	45005.1	98016.7	93553.6	81094.6	137722	141944	141932	141220
M620T595	619.524	594.76	1-linoleoyl-2-oleoyl-rac-glycerol	[M+H]+			Lipids and lipid-like molecules	Fatty Acyls	Lineolic acids and derivatives	1347.38	1279.38	949.815	966.098	1265.14	1056.62	1397.03	1020.98	1209.49	1414.19	1271.7	1050.83	1065.61	1086.73	1263.24	1058.4	1241.17	1249.41	1043.15	1030.72	972.278	979.814	789.925	1248.43	1093.72	1203.53	1203.47	1203.49
M223T385	223.107	385.032	1-methyl-3-isobutylxanthine	[M+H]+		C13708	Organoheterocyclic compounds	Imidazopyrimidines	Purines and purine derivatives	254248	199344	199245	157274	198422	281803	178734	177578	163140	141954	207385	249839	187015	72603	197761	178995	185876	71746.1	75702	165380	217538	92341.7	158236	126153	179698	185486	179709	179716
M124T385	124.086	384.677	1-methyl-l-histidine	[M+H-CH2O2]+	HMDB0000001	C01152	Organic acids and derivatives	Carboxylic acids and derivatives	Amino acids, peptides, and analogues	50398.5	53178.8	64027.8	46575.8	27332.6	46274.9	48300.2	56925	54887.5	46260.4	45880.7	53552.3	41909.5	56646.4	44354.8	26176.6	30160.2	35798.5	47619.5	39309.2	60752	45027	41958.3	30555.5	54237.8	51694	54088.5	41006.3
M110T96	110.059	96.441	1-methylxanthine	[M+H-C2H3ON]+	HMDB0010738	C16358	Organoheterocyclic compounds	Imidazopyrimidines	Purines and purine derivatives	27542.5	43721.4	47484.2	24754.9	46740.9	28326.2	41377.4	40060.6	40180.6	42354	57246.4	34973.6	63861	52750.9	24981.1	65861.4	33305.5	69032.6	42251.4	29081.7	22887	73421.2	35975.5	55163	53498	62143.3	53355.8	53363
M355T36	355.282	35.5	1-monolinoleoyl-rac-glycerol	[M+H]+			Lipids and lipid-like molecules	Fatty Acyls	Lineolic acids and derivatives	127950	97192.8	104523	75830.6	112517	114277	92966.6	87956.1	100009	113466	79361	82799	105483	93095.8	93413.8	102654	96003.2	108689	87349.9	122361	207935	108333	116630	144590	121577	121627	112285	121621
M426T195	426.259	194.667	1-myristoyl-2-hydroxy-sn-glycero-3-phosphoethanolamine	[M+H]+	HMDB0011500		Lipids and lipid-like molecules	Glycerophospholipids	Glycerophosphoethanolamines	176458	166407	104395	118605	191413	75162.9	123682	73785.7	273666	74308.9	218059	91492.7	131604	174318	69694.5	70443.8	92825.5	105104	127913	82833.2	45825.9	100579	122933	61149.9	155712	160139	153752	153730
M540T40_3	540.325	39.723	1-o-hexadecyl-2-deoxy-2-thio-s-acetyl-sn-glyceryl-3-phosphorylcholine	[M+H]+			Organic nitrogen compounds	Organonitrogen compounds	Quaternary ammonium salts	69353.1	94600.8	71185.2	42434	66692.8	157144	67838.4	186368	59591.8	56460	53923.8	44705	74620.5	84441.5	48703.7	70961.1	84943.5	95769.6	93690.8	57891.4	74112.1	71143.9	143215	111410	103901	90785.6	90863.9	90564.7
M574T347	574.37	347.175	1-o-hexadecyl-2-o-butanoyl-sn-glyceryl-3-phosphocholine	[M+Na]+			Lipids and lipid-like molecules	Glycerophospholipids	Glycerophosphocholines	12944.5	17754	15314.7	24387.9	16120.4	13361.5	13950.5	17461.3	19961	14222.2	17597.6	14729.5	17516.5	17982.9	19611.5	12491.8	18768.3	22237.9	19258.9	15555.4	13334.8	17765.9	20944.3	17975.3	16998.8	18891.2	17004.6	17267.5
M510T185	510.388	185.159	1-o-octadecyl-sn-glyceryl-3-phosphorylcholine	[M+H]+	HMDB0011149		Lipids and lipid-like molecules	Glycerophospholipids	Glycerophosphocholines	30961.5	35401.3	57888.5	84814.4	34443.9	20387.6	49598	33173.7	62063.7	36421.7	41384.8	114510	23664.3	214666	92042.4	139819	124120	434295	93839.9	193036	48602.5	80519.9	195609	51721.4	150673	150675	148595	150664
M304T234_2	304.225	234.102	1-octanone, 1-(4-methoxyphenyl)-2-(1-pyrrolidinyl)-	[M+H]+			Organic oxygen compounds	Organooxygen compounds	Carbonyl compounds	63044.6	93687.1	61069.9	73989.4	80308	55264.6	82237.7	53671.6	62824.9	53432.6	64851.7	64446.3	93729.5	73428.4	77283.6	52053.9	62587.8	85555.7	120744	77252.7	57933.5	47674.4	66832.6	39749.9	91974.2	89843.4	91404	92132.8
M421T361	421.304	361.291	1-oleoyl-2-acetyl-sn-glycerol	[M+Na]+			Lipids and lipid-like molecules	Glycerolipids	Diradylglycerols	220984	195698	203861	292825	181464	256796	198751	192934	242876	162321	184372	185994	207411	271159	246907	220340	383582	270438	309064	223397	198428	223462	371827	189345	316423	362059	364238	364150
M733T611	732.548	611.149	1-oleoyl-2-myristoyl-sn-glycero-3-phosphocholine	[M+H]+	HMDB0008097		Lipids and lipid-like molecules	Glycerophospholipids	Glycerophosphocholines	1695.79	2072.64	2149.76	2274.62	2015.46	2967.85	4423.93	2515.65	1953.5	2489.68	2308.99	4657.68	3138.79	2096.15	1398.6	3038.5	2725.1	3980.7	3447.26	1890.96	2793.36	2569.51	2465.83	2520.99	6750.24	6451.63	6767.09	4984.76
M522T182	522.352	182.355	1-oleoyl-sn-glycero-3-phosphocholine	[M+H]+	HMDB0002815		Lipids and lipid-like molecules	Glycerophospholipids	Glycerophosphocholines	16173.3	44010.5	31846.8	82540.2	35630	44385.5	43338.7	50709.6	45853.4	63820.9	45761.8	76920.1	46893	97522.7	48656.9	200254	58477.5	541542	99577.3	207859	60292.1	63731.6	225039	59367.7	142558	145829	145263	136574
M480T187	480.306	187.44	1-oleoyl-sn-glycero-3-phosphoethanolamine	[M+H]+	HMDB0011506		Lipids and lipid-like molecules	Glycerophospholipids	Glycerophosphoethanolamines	214708	224006	239353	121290	165065	81812	161449	47585.8	249452	208065	219983	204718	179597	139829	207836	141155	95796	171116	122352	223277	110443	104275	125575	78568.7	211277	217077	211278	211286
M454T190_2	454.291	189.903	1-palmitoyl-2-hydroxy-sn-glycero-3-phosphoethanolamine	[M+H]+	HMDB0011503		Lipids and lipid-like molecules	Glycerophospholipids	Glycerophosphoethanolamines	1.35087e+06	1.00761e+06	779756	956256	1.28488e+06	528893	945188	385041	2.103e+06	595233	1.56138e+06	575196	1.01196e+06	1.63887e+06	428451	488103	805778	911291	923040	726522	364248	962031	766160	450407	1.14526e+06	1.15596e+06	1.14172e+06	1.14173e+06
M719T123	718.532	122.546	1-palmitoyl-2-oleoyl-sn-glycero-3-phosphoethanolamine	[M+H]+	HMDB0008927		Lipids and lipid-like molecules	Glycerophospholipids	Glycerophosphoethanolamines	72596.6	57540.1	52811.1	68221.7	6554.71	66617.5	77923	56542.7	68820.2	49437.2	50899.7	93284	57057.4	47947.6	30112.1	67092.7	68574.4	63122.9	69504.6	38282.1	56714.3	67554.5	87454.8	55023.6	39469	45757.2	45599.9	39684.6
M785T111	784.582	110.984	1-palmitoyl-2-stearoyl-sn-glycero-3-phosphocholine	[M+Na]+	HMDB0007970		Lipids and lipid-like molecules	Glycerophospholipids	Glycerophosphocholines	29972.9	66594.1	130232	126116	36968.3	63484.7	40297.3	21207.3	45289.9	165089	72206.7	30121.3	11817.7	143967	41408.3	493147	114931	2.76457e+06	30005.1	171941	51796	76995.7	1.20214e+06	276619	281122	283344	283549	348313
M496T185	496.337	185.089	1-palmitoyl-sn-glycero-3-phosphocholine	[M+H]+	HMDB0010382		Lipids and lipid-like molecules	Glycerophospholipids	Glycerophosphocholines	29006.1	72464.4	115536	140691	48991.7	49644.2	122583	106090	80287.6	134565	90988.7	188287	28013.4	286003	160269	468889	145753	1.5767e+06	332524	355924	93005.2	166330	547976	187612	330406	331645	332629	330405
M313T53	313.272	52.712	1-palmitoylglycerol	[M+H-H2O]+			Lipids and lipid-like molecules	Glycerolipids	Monoradylglycerols	61161.6	65904.3	110234	31015.7	71074.9	73264.7	79543.2	71102.7	78334.4	82315.4	77289.4	54237.4	92246.2	42489.3	39022	64499.2	62114	49440.6	62379	55870.6	73689.2	69318.4	54447.9	51285.7	74930.7	75016.6	76741.5	81882.2
M372T409	372.22	409.196	1-pentyl-3-(4-methoxynaphthoyl)indole	[M+H]+			Organoheterocyclic compounds	Indoles and derivatives	Naphthoylindoles	28344.9	10596.6	15660.6	28781.1	13626.7	26400	9360.78	24003.8	28512.7	21622.8	33425.2	27296.2	14262.4	25530.4	24960.4	14524.1	13162.4	12289.2	33390.7	9790.49	11631.5	15362	28640.1	12533.2	23804.5	20689.2	18258.5	18708.8
M356T227	356.217	227.042	1-pentyl-3-(4-methylnaphthoyl)indole	[M+H]+			Organoheterocyclic compounds	Indoles and derivatives	Naphthoylindoles	43264.5	30157.2	45272.4	73218.5	42883.4	19395.2	54990	29874.7	27033.6	43696.1	47417.3	40103.4	42098.9	54837.9	68751.8	48540.8	56264.9	59058.6	79652.4	49909.3	47186.4	96798.9	57281.9	72741.3	64734.5	53561.1	62412.5	67553.4
M105T167_2	105.069	166.762	1-phenylethanol	[M+H-H2O]+	HMDB0032619	C07112				244852	2.46859e+06	1.45727e+06	1.30341e+06	382548	174188	1.57712e+06	96298.3	556719	163967	1.07964e+06	1.90611e+06	419240	84958.5	225083	146896	124631	73147.6	99658.2	2.98327e+06	755771	117309	455136	79472.9	845162	840628	845643	843623
M463T398	463.152	397.981	1-piperazinecarboxylic acid, 4-[(3-phenoxyphenyl)methyl]-, 2,2,2-trifluoro-1-(trifluoromethyl)ethyl ester	[M+H]+			Benzenoids	Benzene and substituted derivatives	Diphenylethers	6761.07	23096	23243.5	29430.1	25758.8	8672.38	25814.5	24188.2	8322.88	23994.7	22174.4	26934.5	8127.05	31158.7	29001.3	26583.4	11439.2	28897.6	29422.5	25358.9	13093.3	24883.4	24769.8	28740.3	17660.6	21300.4	20354.3	17881.8
M514T239	514.289	239.359	1-piperazinecarboxylic acid, 4-[1-[[4-[(1,1-dimethylethoxy)carbonyl]phenyl]methyl]-1h-indol-4-yl]-, 1,1-dimethylethyl ester	[M+Na]+			Organoheterocyclic compounds	Diazinanes	Piperazines	24155.1	28301.3	28017.4	32633.9	25529.9	36983.9	28150.5	23230.4	29543.5	30494.8	27791.2	26330.7	22802.1	32465.3	42955.3	54040.6	32476.6	31162.3	35583.2	33630.1	29023.5	29306.8	62463.2	24810.1	40585.1	39206.2	38577.9	38562.9
M691T334	691.379	333.665	1-piperidinecarboxamide, n-phenyl-4-(3-quinolinylmethyl)-	[2M+H]+						9990.23	9802.9	10112.2	11599	11929.7	11051.8	10108.8	15100.1	9864.35	9780.51	9403.46	10503.2	9621.71	13617.6	6085.88	2807.12	13007.9	14839.5	14444.1	13864.5	10296.7	9689.74	12543.2	4363.29	13375.3	12233.8	12233.6	12229.2
M306T222	306.241	221.542	1-pyrrolidineheptanoic acid, 2-(3-hydroxyoctyl)-5-oxo-	[M+H-2H2O]+			Lipids and lipid-like molecules	Fatty Acyls	Fatty acids and conjugates	126005	132215	133473	167779	99637.5	119688	152255	110212	120465	185234	135896	165004	108734	166127	156023	111842	121017	257193	174967	96095.1	164858	120354	133083	82840.9	185109	190349	183015	183043
M346T221	346.247	221.315	1-pyrrolidineheptanoic acid, 2-[(1e,3s,4s)-3-hydroxy-4-methyl-1-nonen-6-yn-1-yl]-5-oxo-, (2r)-	[M+H-H2O]+			Lipids and lipid-like molecules	Fatty Acyls	Fatty acids and conjugates	96966.1	115367	99496	57377.6	80489.2	114826	129731	85137.7	149622	92140.4	94434.9	97088.7	101591	44629.8	98510.6	95338.8	88330.7	102609	51596	77198.6	88930.7	42310.8	74154.9	68523	120391	118910	111739	116948
M546T364	546.339	363.644	1-stearoyl-2-hydroxy-sn-glycero-3-phosphocholine	[M+Na]+	HMDB0010384	C04230	Lipids and lipid-like molecules	Glycerophospholipids	Glycerophosphocholines	26938.2	28127.1	27226.3	37959.8	30170.6	26490.5	24886.4	32580.3	30333.6	24948	32803	28566.3	31459.1	30347.5	35134.9	30867.6	38593	36178.4	42880.2	31338.6	27816.6	31832.1	37386.1	30193.8	37601.1	37613.2	36974	34029.9
M811T57	810.54	57.385	1-stearoyl-2-linoleoyl-sn-glycero-3-phospho-l-serine	[M+Na]+	HMDB0012380		Lipids and lipid-like molecules	Glycerophospholipids	Glycerophosphoserines	39573.1	28048.3	35527.6	40310	17575	39638	32190	38383.3	25794.7	28019.9	36791.2	21557.1	34106.7	68593	28296.8	25100	23503.7	30243.2	39325.2	26043.3	19338.6	90257.3	37081.5	38178.5	31763.7	37426.4	37449.5	36577.1
M811T35_1	810.595	35.2465	1-Stearoyl-2-oleoyl-sn-glycerol 3-phosphocholine (SOPC)	(M+Na)+	HMDB0000564/HMDB0007878/HMDB0007879/HMDB0007880/HMDB0007882/HMDB0007884/HMDB0007886/HMDB0007887/HMDB0007897/HMDB0007898/HMDB0007911/HMDB0007912/HMDB0007913/HMDB0007914/HMDB0007936/HMDB0007937/HMDB0007938/HMDB0007939/HMDB0007940/HMDB0007958/HMDB0007959/HMDB0007960/HMDB0007961/HMDB0007964/HMDB0007966/HMDB0007967/HMDB0007981/HMDB0007982/HMDB0007983/HMDB0007984/HMDB0007985/HMDB0008002/HMDB0008003/HMD…	C00157	Lipids and lipid-like molecules	Glycerophospholipids	Glycerophosphocholines	109714	94402.1	87887.5	84168.8	76760.6	116746	53894.7	66370.6	80281.9	81037.5	79835.1	45019	88383	83916.9	100761	107255	45340.4	168551	76919.5	67980.9	80312.9	80608.8	136462	91956.3	99179.3	101749	101809	90802.9
M191T166	191.153	165.817	1,1-dimethyl-4-phenylpiperazinium	[M+H]+			Organoheterocyclic compounds	Diazinanes	Piperazines	107483	54135.8	50270.7	56843.7	54301.3	43368.9	41763.7	36200.8	44698.7	44786.8	63087.9	36642.3	64920	66666.7	76963.3	29889.6	38553	34831.5	58893.1	28340	49542.4	62472.9	62389.1	34840.2	61586	63574.5	61602.9	68677.1
M241T136	241.169	135.99	1,2-benzenediamine, 4-methyl-n1-(3-phenylpropyl)-	[M+H]+			Benzenoids	Benzene and substituted derivatives	Phenylpropylamines	48113.6	76502.8	52847.4	80075.7	9243.84	61125.7	66371.7	69274.5	54125.1	53356.8	67530	55068.6	61405.5	99435.5	63047.7	41024.5	15830	78361.1	116378	18120.6	70844.3	89467.4	137505	41504.1	77675.9	77531.9	72060.6	74500.1
M72T292_2	72.0806	291.807	1,2-diamino-2-methylpropane	[M+H-NH3]+			Organic nitrogen compounds	Organonitrogen compounds	Amines	555895	574738	330484	177809	298915	435240	810278	586916	469661	449105	425656	411863	511265	393743	347829	245080	255475	308562	216034	468137	332938	249920	293980	225483	474326	570474	473113	474212
M552T33	551.5	32.954	1,2-dihexadecanoyl-sn-glycerol	[M+H-H2O]+			Lipids and lipid-like molecules	Glycerolipids	Diradylglycerols	77415.8	70766.7	63553.6	53936.5	82834.3	136694	70569.1	53925.1	132997	118331	53878.8	52705.7	48586.6	61224.4	115421	43805.5	26167.3	42913.9	48000.3	54605.9	36950.3	48446.1	40290.9	39175.8	68098.7	63483.8	67895.5	49010.2
M179T226	179.117	225.789	1,2-dimethoxy-4-(2-propenyl)benzene	[M+H]+	HMDB0031864	C10454	Benzenoids	Benzene and substituted derivatives	Methoxybenzenes	60932.8	81241.6	74434.3	57420.8	51295.6	71598.7	74122.9	62833.7	58101.2	69158.6	75010.1	65997.3	52460.7	65996.5	70363.6	57627.8	46283.7	53118.7	59159.3	53282.1	64664.8	60774.3	59396.1	37107.7	76578.3	71805.2	77443.2	77449.9
M636T135	636.455	135.277	1,2-dimyristoyl-sn-glycero-3-phosphoethanolamine	[M+H]+			Lipids and lipid-like molecules	Glycerophospholipids	Glycerophosphoethanolamines	23927.2	47456.4	28340.4	17840.5	29064.6	25817.3	21793.2	21223.2	37543.4	14705.5	32062.6	17277.4	29147.9	29428.6	13769	20333.8	15112.4	24727.8	32260.5	22020.4	8839.54	27317.4	31362.6	20443.8	28414.3	29853	29486.1	29853.5
M787T109	786.596	108.807	1,2-dioleoyl-sn-glycero-3-phosphatidylcholine	[M+H]+	HMDB0062690		Lipids and lipid-like molecules	Glycerophospholipids	Glycerophosphocholines	25925.6	73121	259559	169176	54423.8	86473	59726.3	23550.7	70575.1	141542	59004.6	151579	46388.8	286250	104956	1.17079e+06	150935	4.09442e+06	15084	266648	178170	154896	2.32686e+06	537536	467744	514602	470919	521327
M795T41_2	794.546	41.113	1,2-dioleoyl-sn-glycero-3-phosphoethanolamine-n,n-dimethyl	[M+Na]+	HMDB0010564		Lipids and lipid-like molecules	Glycerophospholipids	Glycerophosphoethanolamines	80652.9	69858.9	51986.1	63812	71829.9	54761.5	41967.6	32814.6	49118.1	40318.6	18229.2	19421.8	19274.9	22906.4	27155.7	51596.9	21121.8	199484	29182	65974.6	15867.3	40801.3	30895.7	77030.9	39948.7	40338.5	21670.3	39949.9
M731T123	730.536	122.871	1,2-dipalmitoleoyl-sn-glycero-3-phosphocholine	[M+H]+	HMDB0008002		Lipids and lipid-like molecules	Glycerophospholipids	Glycerophosphocholines	25081.2	16687.2	36252.7	30216.6	16386.7	18274.5	19391.1	15233.3	20583.7	20217.8	22948	5213.5	17404.4	31402.8	8461.1	66716.8	21295.2	209957	25616.9	23238.3	30453.4	40791.4	98030.7	59811.8	37395.8	36575.8	38904.8	36557.7
M743T122	742.533	121.895	1,2-dipalmitoyl-sn-glycero-3-phosphoethanolamine-n,n-dimethyl	[M+Na]+	HMDB0010566		Lipids and lipid-like molecules	Glycerophospholipids	Glycerophosphoethanolamines	15923.5	17236.4	31098.7	7825.58	12061.5	14637.4	25914.2	14870.9	7778.9	18213.5	25787.6	7946.26	19686.1	13635.3	12023.8	14401.9	14933.4	22529.4	19078.8	18273.5	15377.5	17111.2	24327	8963	23274.3	19460.1	23170.8	23222
M664T133	664.488	133.081	1,2-dipentadecanoyl-sn-glycero-3-phosphoethanolamine	[M+H]+	HMDB0008889		Lipids and lipid-like molecules	Glycerophospholipids	Glycerophosphoethanolamines	527333	179432	372258	443470	443164	359589	432521	579984	509529	166137	567147	131579	531449	653820	131955	194896	326317	625752	672828	248814	246330	740561	535015	422531	450368	451004	448211	421744
M700T627	700.481	626.923	1,2-ditetradecanoyl-sn-glycero-3-phosphocholine	[M+Na]+	HMDB0007866		Lipids and lipid-like molecules	Glycerophospholipids	Glycerophosphocholines	17379.7	19750.8	20318.4	23822.6	33211.4	15790.7	3317.07	16922.6	26648.4	20986.6	21453.2	21892.9	2083.19	5429.54	13620.9	2501.59	5934.26	12390.5	18231.2	8277.33	19583.9	21364.9	3451.54	21975.4	14244.4	13908.6	14214.1	6317.02
M473T311	473.122	310.661	1,2-dithiolane-3-pentanamide, n,n'-1,3-propanediylbis-	[M+Na]+			Organoheterocyclic compounds	Dithiolanes	Lipoamides	5045.3	5594.49	4959.83	5525.42	6033.18	4938.1	4066.72	4157.62	3942.88	4316.81	2266.45	5812.71	4143.12	6193.68	3240.53	5074.07	6614.1	6344.28	8733.44	6042.6	6099.37	7697.18	6069.63	4852.58	5669.82	5848.83	5669.54	5669.49
M416T387	416.169	387.353	1,2,4-triazin-5-amine, n-([1,1'-biphenyl]-4-ylmethyl)-6-phenyl-3-(2-pyridinyl)-	[M+H]+			Benzenoids	Benzene and substituted derivatives	Biphenyls and derivatives	18703	16046.8	17692.1	21505.6	9640.93	17542.2	17800.3	16470.4	14822.5	14862.4	15845.5	18011.6	17504.4	21545.3	12183.9	10271.9	19331	19623.8	13658.5	18456.6	19192.6	17630.3	15057.2	18758.6	20424.5	18738.2	18534.8	19166
M440T338_1	440.173	337.969	1,3-cyclobutanedicarboxylic acid, 2,4-diphenyl-, 1-(1-naphthalenyl) ester, (1.beta.,2r,3.alpha.,4r)-	[M+NH4]+						37273.4	69559.6	50441.7	72660.9	81233.8	83282.8	70924.4	34419.3	63673.6	56616.1	88547.7	75307.5	36434	42459.6	53709.5	31962.7	30865.1	46163.8	43484.1	22927.4	40849.6	15147.2	34107.2	28619.2	53863.2	51142.8	49450.5	49553.2
M404T330_1	404.173	329.77	1,3,4-oxadiazol-2(3h)-one, 3-[1-[[1-(4-methylphenyl)cyclopropyl]carbonyl]-4-piperidinyl]-5-phenyl-	[M+H]+			Benzenoids	Benzene and substituted derivatives	Phenylacetamides	228113	200945	81960.5	336228	167141	206580	165366	91321.3	108253	247558	184719	67377.9	178208	223499	100038	150932	375020	305063	277409	28282.9	196616	199649	309532	78874.6	221244	221869	221747	64696.5
M419T40_1	419.191	39.5235	1,4-bis(p-tolylamino)anthraquinone	[M+H]+			Benzenoids	Anthracenes	Anthraquinones	50526.5	42394.3	52221.8	36180.4	28005.8	39017.1	18032.5	44226.8	23959.9	42170.9	43603.1	27692	48462.3	49905.9	31961	17889.3	45759.1	8707.83	52739.9	26099.1	41905.4	49466.6	47891.2	40501	44065.7	43715.5	25223.2	40938.4
M152T544_2	152.127	543.894	1,4-cyclohexadiene-1-ethanamine, n,.alpha.-dimethyl-	[M+H]+			Organic nitrogen compounds	Organonitrogen compounds	Amines	1658.21	8025.33	5655.2	14932.8	4052.9	7299.57	4407.81	9452.47	1961.24	8751.94	2510.82	12737	3932.97	8703.25	8174.33	3722.1	5219.52	8216.15	19562.8	10127.8	5332.3	18026.1	15172.1	24082.1	8219.39	10116.6	10105.5	9803.96
M605T134	605.139	133.798	1,4-piperazinediethanesulfonic acid	[2M+H]+			Organoheterocyclic compounds	Diazinanes	Piperazines	70538.3	69012.7	69344	46719.6	91783.4	78566.9	71128	57704	81252.5	47746.4	50105.7	61450.8	70725.1	71276.3	45426	100486	40777.2	54717.7	61171.2	43270.7	37910	74025.5	81257.5	101283	109702	75437.9	82621.2	75514
M125T242	125.106	242.081	1,5-diazabicyclo[4.3.0]-non-5-ene	[M+H]+						72874.9	90066.8	76279.5	78897.3	44108.7	57713.9	84712.5	82853.7	58208.5	90227.5	87059.7	80765.8	53431	97445.8	81082.5	78216.8	65799.4	84390.2	74542.1	44438.3	98695.7	73392.5	74374.5	46472.5	85457.4	86430	84832.6	84828.1
M86T255	86.0964	255.327	1,5-pentanediamine	[M+H-NH3]+	HMDB0002322	C01672	Organic nitrogen compounds	Organonitrogen compounds	Amines	658296	1.27769e+06	742755	528275	602802	1.06626e+06	1.12891e+06	933262	992573	1.00016e+06	969018	1.00561e+06	589324	1.02978e+06	879384	550354	667229	1.19419e+06	593611	1.34381e+06	945594	834397	886006	722091	1.11518e+06	1.12549e+06	1.15439e+06	1.115e+06
M499T319	499.17	319.251	1,7-bis(4-hydroxyphenyl)-5-[(2r,3r,4s,5s,6r)-3,4,5-trihydroxy-6-(hydroxymethyl)oxan-2-yl]oxyheptan-3-one	[M+Na]+			Phenylpropanoids and polyketides	Diarylheptanoids	Linear diarylheptanoids	20815.6	11056.1	11839.6	21666.9	28472.9	35499.3	34336.7	40392.9	16011.9	37936.6	29740.3	19625.8	24366.8	32166	33841.8	37958.3	37070.6	22937.2	56852	26091.1	26834.5	49995.5	36891.1	10398.2	30690.5	32044.1	30745.6	34916.5
M653T191	653.368	190.674	1',4-sophorolactone 6',6-diacetate	[M+H-2H2O]+						21895.6	19006.5	20743	27662.3	22247.2	19087.5	62322.7	20337.9	38732.4	36172.9	34640.9	25732.7	16326.2	26922.3	21020.1	25573.4	25300.6	51232	30293.8	32855.6	14788.6	21151.4	28343.7	19484.2	61905.6	41137.5	41063.2	41245.1
M643T197	643.328	196.922	1(2h)-pyrimidineacetamide, n-[(1s,3s,4s)-4-[[2-(2,6-dimethylphenoxy)acetyl]amino]-3-hydroxy-5-phenyl-1-(phenylmethyl)pentyl]tetrahydro-.alpha.-(1-methylethyl)-2,4-dioxo-, (.alpha.s)-	[M+H]+			Organic acids and derivatives	Carboxylic acids and derivatives	Amino acids, peptides, and analogues	7214.64	22306.8	13244.2	28354.8	17216.2	13720.9	18394.6	29938.9	24015.3	6745.1	22999.1	16415	21872.4	28937	31341.4	24435.8	23672	30274.8	10316.6	29964.8	22303.3	15013.2	25550.3	30399.3	23106.4	30969.6	30925.7	30994.1
M627T277	627.335	277.336	1(2h)-pyrimidineacetamide, n-[(1s,3s,4s)-4-[[2-(2,6-dimethylphenoxy)acetyl]amino]-3-hydroxy-5-phenyl-1-(phenylmethyl)pentyl]tetrahydro-4-hydroxy-.alpha.-(1-methylethyl)-2-oxo-, (.alpha.s)-	[M+H-H2O]+			Organic acids and derivatives	Carboxylic acids and derivatives	Amino acids, peptides, and analogues	35919.9	42557	37505.5	41178.2	33550.4	34107.8	40640.8	36335.2	50878	29965.7	35157.3	37197.9	36195.5	44363.2	32276.5	40993.8	46626.4	40932.9	58975.4	38975.8	27001.4	36663	35988.5	29560.4	49019.8	50016.4	53254.8	51602.7
M509T341	509.219	341.193	10-deacetylbaccatin iii	[M+H-2H2O]+		C11700	Lipids and lipid-like molecules	Prenol lipids	Diterpenoids	18323.3	20931.1	15181.5	13804.4	19832.9	14689.3	17708.8	11791.9	15919.4	23798.8	18827.2	17045.3	14369.7	18384.2	20309.2	15131.6	24137.2	20563.2	25630.1	18217.6	20304.6	21296.2	8152.55	13434.6	19512.3	19636.6	18443.6	19925.6
M350T244	350.237	244.351	10-nitrooleic acid	[M+Na]+	HMDB0062737		Lipids and lipid-like molecules	Fatty Acyls	Fatty acids and conjugates	48758.3	101755	56587.1	43527.9	98059	86684.8	40527.3	58980.9	46744	47832.7	62817.4	37488.9	55235	23378.7	66768.4	43468.7	28006.4	23638.9	27658.9	36284	30492.9	38715	111684	29874.6	125265	112311	113179	129500
M483T274	483.201	274.019	11-(6-{[2-(3,4-dimethoxyphenyl)ethyl]amino}-4-chloro-1,3,5-triazin-2-yl)-7,11- diazatricyclo[7.3.1.0<2,7>]trideca-2,4-dien-6-one	[M+H]+			Alkaloids and derivatives	Lupin alkaloids	Cytisine and derivatives	21490.1	30263.1	25597.6	29509.7	16871.2	12637.2	25087	25400.3	35193.4	21560.4	32063.3	25114.4	22182.8	44612	31628.2	20530.8	40545.9	27787.1	32137.7	33500.7	30074.9	23996.9	34009.5	53126.8	27010.5	25920.3	27036.7	28722.8
M399T412	399.196	412.321	11,12-methylenedioxykopsinaline	[M+H]+						51070.4	60074.4	55676.8	98402.3	59836	47457.9	58593.8	121881	74799.1	77875.4	63967.7	61985.8	86391	36108.1	56178.9	70241.7	194941	48500	54344.8	55463.1	57970	65929.9	76908.8	47680.6	94006.3	73586.6	73941	78543.7
M942T225	941.518	225.066	12-deoxywithastramonolide	[2M+H]+			Lipids and lipid-like molecules	Steroids and steroid derivatives	Steroid lactones	7204.84	5921.7	6680.1	10780.6	6474.01	6073.86	10555.7	6993.08	5388.85	6172.36	9001.14	5999.6	6179.2	6278.17	7909.1	7011.04	8565.74	12731.9	11775.2	8283.64	4275.71	6723.7	9781.43	6792.24	13445.6	12699.2	10670	14680.1
M239T355	239.138	355.161	12-hydroxydodecanoic acid	[M+Na]+	HMDB0002059	C08317	Organic acids and derivatives	Hydroxy acids and derivatives	Medium-chain hydroxy acids and derivatives	147444	146482	146213	158696	152003	169855	169392	146986	145766	120005	171785	154395	156629	106796	154267	151872	147811	103638	152174	171705	140463	101791	152870	108111	154776	152318	151613	151616
M499T231	499.249	230.755	13,14-epoxyfluprostenol isopropyl ester	[M+H-H2O]+						79873.9	47685.3	59053	60841.5	44951.8	75086.5	102480	186053	54490.4	80330.1	43803.3	42534.1	80442.7	34829.1	38351.6	69985.8	22347.9	91678.4	86201.2	97840.5	56815.7	37650.5	96452.7	121514	63444.3	82531.8	82434.8	82489.8
M517T335	517.265	334.935	13(r),14(r)-epoxyfluprostenol isopropyl ester	[M+H]+			Lipids and lipid-like molecules	Fatty Acyls	Eicosanoids	31560.9	40095	21871.6	8914.51	49950.3	21113	12239.4	46538.4	28480.3	32963.9	46985.9	25940.1	13832.4	54819.3	30131.3	57869.6	43955.2	37607.9	31914	47777.4	49947.7	34018.4	45861.9	34397.9	41569.6	36268.9	43056.9	43039.4
M649T235	649.38	234.966	15-deoxy-.delta.12,14-prostaglandin j2 biotinamide	[M+Na]+			Lipids and lipid-like molecules	Fatty Acyls	Eicosanoids	12293.7	10304.1	14276.9	16251.9	16369.8	9944.59	17447.8	13563.6	11191.4	10594.6	12363.6	17781.7	6317.54	4323.94	3553.41	21042.7	26518.9	20392.9	13331.6	15692.8	10885.1	11299.5	14487.5	13614.9	18600.7	17709.7	18617.3	18401.5
M624T438	624.282	437.938	15-deoxy-.delta.12,14-prostaglandin j2 glutathione	[M+H]+			Lipids and lipid-like molecules	Fatty Acyls	Eicosanoids	26549.2	18157.8	37543.4	48031.6	40378	40267	21191.7	38309.4	21969.8	30672.5	35566	34020.3	37271.9	45759.5	13369.5	34913.7	47691.9	16433.3	15111.6	44446.6	36201.3	37283.3	41749.3	38370.7	46142.5	45724.9	46144.2	43558.3
M284T591	284.33	591.047	15-deoxy-goyazensolide	[M+K]+			Organoheterocyclic compounds	Lactones	Gamma butyrolactones	3682.87	2768.79	4170.74	2084.66	3519.55	2643.97	3533.97	2960.5	2312.19	17325.4	2062.57	3423.72	1972.54	18231.4	3336.34	3963.1	1822.31	4874.89	3264.88	2280.28	2098.52	3818.97	2036.9	4172.64	4907.73	5261.17	4654.01	5028.25
M396T377	396.236	376.997	15-ketobimatoprost	[M+H-H2O]+			Lipids and lipid-like molecules	Fatty Acyls	Eicosanoids	15247.4	19830.6	19864.7	25180.2	24569	30826.9	21034.7	25706.4	20311.2	25292	27472.5	23451	15226.3	25730.4	24286.3	22151.6	17629.5	6363.54	15900.5	15175.7	21902.2	30295.6	16287.2	17214.1	21197.2	27815.1	21979	23788.7
M353T326	353.241	326.055	15-ketoprostaglandin f2.alpha.	[M+H]+	HMDB0004240		Lipids and lipid-like molecules	Fatty Acyls	Eicosanoids	31977.7	59016.8	50160.8	50208	74732.6	65793.1	56102.9	44850.4	54252	32886.8	45049	32017.5	41884.7	28316.3	61085.2	33229	38649	32389.5	43133.9	37382.4	59182.9	36134.9	41837.8	29994.8	34125.4	32822.9	32838.9	36175.8
M413T248	413.248	247.54	15(r)-17-phenyltrinorprostaglandin f2.alpha. isopropyl ester	[M+H-H2O]+			Lipids and lipid-like molecules	Fatty Acyls	Eicosanoids	38750.5	48674.9	41142.1	86633.4	46707.8	58723.4	55525.3	58506.4	39200.3	52464	48420.4	42895	48042.2	59389.9	51470.9	48073.6	43098.7	81414.7	85702.6	80790.8	44120.4	67373.5	75455.4	51693.6	67492.9	71362.9	81284.6	67243.7
M333T211	333.256	211.499	16-Hydroxypalmitic acid	(M+CH3COO+2H)+	HMDB0006294	C18218	Lipids and lipid-like molecules	Fatty Acyls	Fatty acids and conjugates	11216.1	5165.69	13076.6	15066.1	9351.03	8962.3	9930.46	10381.1	14122.8	11135.6	18870.3	15429.3	12736.9	12760	13910.3	14938.8	12444.7	18197.9	19024.3	6875.38	14380.9	8410.62	17307.4	6850.23	13670.3	13672	12169.4	13660
M363T228_2	363.262	228.094	16,16-dimethylprostaglandin e2	[M+H-H2O]+			Lipids and lipid-like molecules	Fatty Acyls	Eicosanoids	35691.9	74497.4	49960.3	42919.3	38780.8	42669.5	52205.3	37416.8	107172	32513.6	42467.9	116128	21302.8	9202.33	27769.1	39879.4	13483.6	48396.4	33656.4	33619.6	27151.7	30821.1	45792.3	22966.7	55452.4	55596.5	47813.4	53215.8
M375T206	375.17	205.94	16.alpha.,17,21-trihydroxypregna-1,4-diene-3,11,20-trione	[M+H]+			Lipids and lipid-like molecules	Steroids and steroid derivatives	Hydroxysteroids	15279.4	22799.1	20898.9	18490.6	23532.8	21223.9	12894.7	23234.3	16687.6	22667	19294.6	23570.8	26893.1	31864.8	34158	30655.5	28118.9	38826.4	41826.8	29876.7	23149.5	23037.2	19646	16154.1	22600.8	23102.9	23078.4	21567
M263T35	263.236	35.2215	17-octadecynoic acid	[M+H-H2O]+			Lipids and lipid-like molecules	Fatty Acyls	Fatty acids and conjugates	770120	504627	528265	924334	547507	586707	1.1324e+06	1.04153e+06	625477	726859	995378	878250	956565	1.09888e+06	737318	842057	548497	908188	671611	522153	612542	1.40066e+06	571886	572664	868744	877368	874808	868749
M396T299	396.272	298.975	17-phenyltrinorprostaglandin e2 ethylamide	[M+H-H2O]+			Lipids and lipid-like molecules	Fatty Acyls	Eicosanoids	16963.4	11796.7	15753.8	10701.5	20250.8	24144	21157.2	18137.6	15119.7	22602.7	20533.6	14432.8	15429.2	13651.9	15781.2	23891.8	21431.1	26779.2	20267.6	20349.4	16592.3	15298.2	24608.7	10544.5	22886.6	30638.9	27739.9	26363.3
M366T378	366.225	377.649	17-phenyltrinorprostaglandin f2a methylamide	[M+H-2H2O]+			Lipids and lipid-like molecules	Fatty Acyls	Eicosanoids	27865.6	28092.5	22230.9	38082.9	16293.6	42880.1	26140.9	24309.8	34569.5	27348.2	29654.3	25717.9	18486.5	23866.5	25049.6	24520.8	28813.9	8975.76	18995.3	35473.3	35348.1	41937.5	39226.5	34201.6	31290.2	29039.7	32388.9	30361
M493T425	493.325	425.145	18.beta.-glycyrrhetinic acid	[M+Na]+			Lipids and lipid-like molecules	Prenol lipids	Triterpenoids	31215.1	7782.58	27946.7	39902	27872	14705.9	17078.4	13770.5	13990.3	19944.1	22326.4	9633.3	21053.3	45509	13240.5	10571	38579.2	23482.4	25494	25689.4	13893.3	28936.3	17862.6	11526	22700.3	32269.1	32323.9	32216.4
M285T387	285.179	387.303	19-hydroxyandrost-4-ene-3,17-dione	[M+H-H2O]+	HMDB0003955	C05290	Lipids and lipid-like molecules	Steroids and steroid derivatives	Androstane steroids	9998.35	47893.5	42516.8	47357.4	79443.3	63403.5	55941.1	39882.7	60333.1	28973.2	71849.9	56948.9	51743.3	12817.1	54504.3	46353.6	39510.4	16632.8	29483.2	32095.2	48973	15251.9	32893.1	38903.1	46186.5	46281.6	45138.5	46202.1
M365T223	365.278	223.44	1a,1b-dihomoprostaglandin e1	[M+H-H2O]+			Lipids and lipid-like molecules	Fatty Acyls	Eicosanoids	80171.2	86794.7	79136.1	151277	130701	123664	87396.7	100949	80401.3	65714.6	84434.1	82830	93628	112483	75247.6	137636	240661	98611.4	142283	87403.6	107967	89117.9	83576.9	106304	172130	171594	170953	172461
M463T190	463.249	190.315	1h-imidazole-1-acetamide, n-[2-(cyclohexylamino)-1-(2-methylphenyl)-2-oxoethyl]-n-(3-fluorophenyl)-2-methyl-	[M+H]+			Organic acids and derivatives	Carboxylic acids and derivatives	Amino acids, peptides, and analogues	113298	86195.6	85747.7	116374	86347.5	70067.6	124835	62761.4	84201.6	52810.8	92851.2	104880	73648.3	117789	89874.1	105507	138769	167190	127049	109546	68209.3	60707.3	103593	84638.5	157068	155195	154007	155640
M353T181	353.216	181.216	1h-indazole-3-carboxamide, n-[(1s)-1-(aminocarbonyl)-2-methylpropyl]-1-pentyl-	[M+Na]+			Organic acids and derivatives	Carboxylic acids and derivatives	Amino acids, peptides, and analogues	197657	157905	221338	234757	175511	149563	240817	130405	102218	186463	201293	199758	163636	295337	150792	297936	365631	369436	261065	205107	140483	148369	158906	155943	337902	337906	337884	330974
M383T476	383.215	476.33	1h-indazole-3-carboxamide, n-[1-(aminocarbonyl)-2,2-dimethylpropyl]-1-(5-hydroxypentyl)-	[M+Na]+			Organoheterocyclic compounds	Benzopyrazoles	Indazoles	67527.9	18553.8	41233.4	47299.9	10054.7	21022.3	10748.8	31605.1	8878.7	28562.9	14953.3	23195.7	20080	73914.7	26329.2	34423.2	42135.9	101319	58899.9	49151.3	17133.7	48516.9	53368	37479.7	57225.3	57217.1	63152.1	57252.8
M374T306	374.225	306.137	1h-indole-1-pentanoic acid, 3-[[[1-(aminocarbonyl)-2,2-dimethylpropyl]amino]carbonyl]-	[M+H]+			Organic acids and derivatives	Carboxylic acids and derivatives	Amino acids, peptides, and analogues	23039.1	65907.8	19642.3	11236	11411.9	12171.3	13256.8	28118.6	69971.8	19099	75528.9	17902.7	39427.9	25183.5	45910.6	36787.3	17495	75102.8	31898.5	38617.1	20266.5	40684	29856.5	43573.4	36418.6	38266.1	36963.7	36417.5
M440T292	440.309	292.329	1h-indole-3-carboxamide, 7-methoxy-1-[2-(4-morpholinyl)ethyl]-n-[(1s,2s,4r)-1,3,3-trimethylbicyclo[2.2.1]hept-2-yl]-	[M+H]+			Organoheterocyclic compounds	Indoles and derivatives	Indolecarboxylic acids and derivatives	55110.7	46446.9	51854.1	62023.3	49907.3	94130.2	53078.5	47342.7	42100.6	45272.4	48359.3	86145.9	63592.2	98748	62545.8	87500.2	54553.6	56641.6	103712	101990	49458.8	40530	89681.9	48125.4	59012.6	55636.7	56455	66797.7
M379T386_1	379.162	386.27	1h-indole-3-carboxamide, n-1-naphthalenyl-1-pentyl-	[M+Na]+			Organoheterocyclic compounds	Indoles and derivatives	Indolecarboxylic acids and derivatives	43426.7	69705.4	54388.5	57526.9	58879.7	52463.2	31588.4	46550.6	36572.8	37449.4	26206.9	78617.5	45505.5	66084.8	44639.6	61642.5	61805.1	110388	45059.8	47494.5	42380.4	79681.3	35969.9	56231.2	51774	46363.2	47154.9	50485
M247T359	247.164	359.067	1h-indole-3-ethanamine, 5-methoxy-n-methyl-n-(1-methylethyl)-	[M+H]+			Organoheterocyclic compounds	Indoles and derivatives	Tryptamines and derivatives	53961	59168.4	40826.2	53270	45914.6	42089.9	48455.3	29226.3	40196.1	37595.2	32321.9	43536.7	33079.1	40720.6	36735	42635.4	55082.6	40303.3	56018.1	56043.8	47297.5	61058.9	45902.3	50447.9	46213.5	50407.7	50240.4	50401.6
M568T424	568.183	424.462	1h-indole-5-sulfonamide, n-(3-chlorophenyl)-3-[[3,5-dimethyl-4-[(4-methyl-1-piperazinyl)carbonyl]-1h-pyrrol-2-yl]methylene]-2,3-dihydro-n-methyl-2-oxo-, (3z)-	[M+H]+			Benzenoids	Benzene and substituted derivatives	Sulfanilides	26233.8	49018.9	30212.9	59815.7	23922.8	48357.5	16203.4	33284.7	95895.9	49444.1	15524.4	101417	26956.6	22847.7	18303.8	34214.5	25583.5	42640.5	30884.2	38487	45817	76306.1	55660.6	60231.7	29007.9	40568.8	29027.3	29481.4
M616T389	616.36	389.268	2-(5-oxovaleryl)phosphatidylcholine	[M+Na]+			Lipids and lipid-like molecules	Glycerophospholipids	Glycerophosphocholines	6686.34	8031.81	6921.71	6517.17	5719.69	5314.09	9188.49	13356.5	6294.74	13513	7444.01	10326.5	11004.8	11747.6	7405.96	9627.62	11052.6	14167.7	24077.7	15059.3	9635.3	10053.4	10313.7	4807.02	9089.26	8084.73	8334.7	9084.28
M120T250_2	120.08	250.302	2-amino-1-phenylethanol	[M+H-H2O]+	HMDB0001065	C02735	Organic nitrogen compounds	Organonitrogen compounds	Amines	1.27798e+06	2.4829e+06	1.3475e+06	654653	1.22096e+06	2.16633e+06	2.13704e+06	1.75395e+06	1.78373e+06	2.38823e+06	1.81649e+06	1.91492e+06	1.08261e+06	2.28244e+06	1.84938e+06	1.09477e+06	1.45606e+06	2.82354e+06	1.3849e+06	2.7595e+06	1.75011e+06	1.82523e+06	1.78324e+06	1.67096e+06	2.27519e+06	2.26639e+06	2.30024e+06	2.26629e+06
M368T247	368.226	247.47	2-amino-n-cyclopentyl-1-(3-methoxypropyl)-1h-pyrrolo[2,3-b]quinoxaline-3-carboxamide	[M+H]+			Organoheterocyclic compounds	Diazanaphthalenes	Benzodiazines	13355.4	10335.8	29932.8	32038.9	22754.6	24906.8	27688.1	26874.3	14948.2	14305.1	23957.3	25273.9	29751	15425.1	31546.6	31006.9	34732.3	40695	33809.4	36761.8	22190	35119.1	46154.9	27124.9	34010.5	33343	32258.3	34605.9
M116T76	116.07	76.302	2-aminoadipic acid	[M+H-CH2O2]+	HMDB0000510	C00956	Organic acids and derivatives	Carboxylic acids and derivatives	Amino acids, peptides, and analogues	229430	450550	232751	160826	220122	215040	222979	446383	213942	223379	186200	87183.8	166767	189949	99387	172391	174043	170104	178443	163184	196498	173339	180467	195365	199604	195877	198630	199602
M126T242_1	126.054	241.686	2-aminoethylphosphonic acid	[M+H]+	HMDB0011747	C03557	Organic acids and derivatives	Organic phosphonic acids and derivatives	Organic phosphonic acids	77260.6	116532	138910	65642.1	67125.8	159945	88197.8	78909.3	83104.7	175083	130398	247136	61826.9	104378	92976	164842	98990.2	140392	131763	231947	82008	123959	183770	126472	156823	156499	157109	190383
M95T51	95.0596	51.0125	2-aminopyridine	[M+H]+			Organoheterocyclic compounds	Pyridines and derivatives	Aminopyridines and derivatives	28648.9	41099.4	19806.1	41071.6	34604.1	24890.7	52608.7	47301.6	49133.2	10093.2	29721.4	27441.3	28128.1	33583.2	31596.7	24148.9	29451.9	44153	38665.9	31785.6	77084.9	36449.5	44343.5	35444.6	26647.3	26632.7	23050.6	23341.2
M161T60	161.07	59.522	2-aminoquinolin-8-ol	[M+H]+			Organoheterocyclic compounds	Quinolines and derivatives	Aminoquinolines and derivatives	42207.3	23729.6	13962	9871.95	12727.3	31072.4	15076.6	7231.34	22192.8	29975.3	25758	11270.8	18211.9	13409.3	24654.2	9060.41	17515.2	20961.6	19290.6	15264.9	33110.9	9650.63	21627.6	16249.3	18739.6	19357.5	24932.3	21375.6
M136T340	136.039	340.262	2-benzothiazole	[M+H]+	HMDB0032930					19274.2	15804.4	16051.8	18127.8	18097.2	19203.1	21933.8	21937.1	18829	57649.7	19953.1	19235.8	17588.9	14780.9	14427.6	20101.4	16135.3	19643.7	18509.5	17226.7	15472.4	24216.6	17845.5	11760.6	17984.8	17994.5	17986.5	19631.4
M247T247	247.143	246.807	2-cis-4-trans-abscisic acid	[M+H-H2O]+		C06082	Lipids and lipid-like molecules	Prenol lipids	Sesquiterpenoids	55663.4	39892.8	48933	66161.1	25332.3	61368.9	50956.8	38797.7	47237.1	46268.4	40410.1	33124.1	45725.1	52575.3	62504.8	37375.4	54748	42886.9	67292.7	43856.4	64513.1	43496	52380.1	72905.3	47105.5	48835.2	51387.8	47060.6
M194T366_2	194.117	366.159	2-despiperidyl-2-(5-carboxypentylamine)repaglinide	[M+H-C16H21NO4]+			Organic acids and derivatives	Carboxylic acids and derivatives	Amino acids, peptides, and analogues	232111	427859	224148	378797	395109	447742	334107	206308	364604	288523	465523	470446	261264	127726	417235	268003	249140	171531	194289	308993	266294	117884	320037	148628	373832	304936	373855	373959
M837T161	836.554	161.493	2-docosahexaenoyl-1-stearoyl-sn-glycero-3-phosphoserine	[M+H]+	HMDB0010167		Lipids and lipid-like molecules	Glycerophospholipids	Glycerophosphoserines	49067.6	36634.5	45460.1	67751.9	50855.4	40170.4	48803.9	43976.7	39802	39531.7	47582.5	40184.6	38852.6	65637.1	44466.1	56268.1	74556.4	93996.7	65127	50196.4	36818.5	43372.1	43207.1	44512.7	76643	75264.9	74254.8	74263
M333T347	333.115	346.606	2-furancarboxylic acid, 5-[3-[4-[2-(4-fluorophenyl)ethoxy]phenyl]propyl]-	[M+H-2H2O]+			Organoheterocyclic compounds	Furans	Furoic acid and derivatives	30409.6	18268.2	16083.9	27759.7	23438.6	34094.3	14629	19401	23969	17240.5	20940.4	25074.6	20045.7	28465.2	29040.7	19745.4	19038.9	25847.1	24170.3	16709.7	20272.5	28283	20212	30450.6	19077.7	20266.4	19550.6	19063.3
M520T213	520.278	212.916	2-hexadecanoylthio-1-ethylphosphorylcholine	[M+K]+			Organic nitrogen compounds	Organonitrogen compounds	Quaternary ammonium salts	414453	452438	451627	368875	423519	416994	423755	380331	503305	476775	415050	428622	382358	318217	429400	447025	415843	431408	501539	380011	312984	405239	299163	257733	400877	400887	407379	401321
M177T94	177.065	93.7915	2-hydroxy-3-methoxybenzyl alcohol	[M+Na]+			Benzenoids	Phenols	Methoxyphenols	51702.2	56439.2	33513	58083.8	58938.6	64504.3	62134.9	43396.9	48537.2	89661.9	59309.3	45329.3	57218.4	41996.3	30900.7	65440.5	45608.4	29409.4	56615.1	46299	66384.7	49846.7	54738.4	44481.1	43704.9	46058.7	49900.2	43250.3
M152T277	152.054	276.772	2-Hydroxyadenine	(M+H)+	HMDB0000403		Organoheterocyclic compounds	Imidazopyrimidines	Purines and purine derivatives	33309.6	35327.7	27464.3	32622.4	13793.7	19024.3	17511.5	25691.2	30522	26237.3	12356.8	20404.2	30901.3	12818.3	20229.8	15731.1	33198	23811.9	18636.4	31200.4	30627.1	32339.2	16886.2	25330.5	25670	27227.2	28221.1	25742
M107T250	107.048	249.904	2-hydroxybenzyl alcohol	[M+H-H2O]+	HMDB0059709	C02323	Benzenoids	Benzene and substituted derivatives	Benzyl alcohols	13030.5	22577.8	8758.99	9957.94	12378.4	19664.7	15429.4	17725	25424.5	22588.4	14698.9	16740.6	5296.39	19397.2	17009	14245.2	16046.6	22546.1	11369.2	22646.5	24483.3	17143.1	14453.8	14489.3	18241.4	18235.2	18243.2	20545.5
M289T383	289.175	383.495	2-hydroxyestradiol	[M+H]+	HMDB0000338	C05301	Lipids and lipid-like molecules	Steroids and steroid derivatives	Estrane steroids	33044.9	72557.1	46556.8	34643.7	80914.5	63165.4	63493.8	24363	70125.6	39212	82038.7	65840.9	49438.8	19395.9	54309.6	17952.5	49420.3	28729.5	39149.5	40314.7	45026.6	12965.9	31597.8	35905.5	51628.4	50036.3	51066.1	51643.2
M287T358	287.159	358.379	2-hydroxyestrone	[M+H]+	HMDB0000343	C05298	Lipids and lipid-like molecules	Steroids and steroid derivatives	Estrane steroids	143999	171419	175303	199489	193622	173585	305426	145262	303080	138110	201231	181980	195135	119429	167446	239630	178686	126835	166248	163044	175319	132729	153433	149195	230972	221979	234123	200788
M100T245	100.111	245.044	2-hydroxytrimipramine	[M+H-C14H13NO]+			Organoheterocyclic compounds	Benzazepines	Dibenzazepines	24048.8	17875.8	17878.1	25147.3	13900.6	15649.4	20005.7	22116.3	15258.2	24956.9	13300.5	14834.9	11073.9	33856.6	20377.2	20022.4	18882.7	35772.2	27771.5	19091.7	21692.3	28588.9	19287.5	14494.6	24454.1	24497.6	27132	25090.8
M113T240	113.107	240.097	2-imino-4-methylpiperidine	[M+H]+			Organoheterocyclic compounds	Pyridines and derivatives	Hydropyridines	33057.1	80344.4	40556.5	26590.3	23058.8	32494.1	36659.3	48486.8	44382	37375.5	48062.2	32938.6	23966.1	53116.9	36948	24599.3	26154.2	27310.7	31183	17488.5	41127.8	24146	37269	19951.3	31689	31683.1	28940.1	31059.2
M398T367	398.173	367.329	2-methoxy-3,5-dimethyl-6-[(4z)-4-[(e)-2-methyl-3-(4-nitrophenyl)prop-2-enylidene]oxolan-2-yl]pyran-4-one	[M+H]+			Benzenoids	Benzene and substituted derivatives	Nitrobenzenes	33819.7	20283.2	36936.2	30135.6	41358.8	34695.9	36924.1	28819.7	27809.5	31739.4	34816.2	29046.3	31718.1	37874.7	28550.2	38024.1	32895.6	44055.7	41520.7	34211.2	20696.6	36751.9	36847.3	41468.9	37947.3	37473.4	34802.1	38203.1
M124T239	124.075	238.901	2-methoxy-5-nitrophenol	[M+H-O2N]+		C17385	Benzenoids	Benzene and substituted derivatives	Nitrobenzenes	82274.4	180467	96779.5	149353	78416.8	124074	134675	160341	81518.2	154427	204580	151198	115892	168676	171984	174730	145957	154072	107778	74504.9	166678	113367	129566	119751	279446	279316	172559	279471
M69T267	69.0695	266.61	2-methyl-3-buten-2-ol	[M+H-H2O]+	HMDB0033854	C21402	Organic oxygen compounds	Organooxygen compounds	Alcohols and polyols	22884.3	42758.2	14701.8	7936.88	25698.4	38944.6	48733.1	27638.5	39616.4	39284	37360.4	34021.2	17177.6	38570.8	25336.2	16574.2	20588.9	24442.5	21657.9	54816.9	29033.2	30026.6	25632.2	14545.7	39238.2	39238.9	39236.8	40060.1
M179T244	179.117	243.777	2-methyl-6(s)-(3-pyridyl)tetrahydro-1,2-oxazine	[M+H]+			Organoheterocyclic compounds	Oxazinanes	1,2-oxazinanes	35992.7	37968.7	137021	29654.5	26503.8	45282.4	45410.1	25842.1	34322.3	44290.6	167597	37855.9	91099.1	71287.9	174529	114273	37474.9	38944.8	63658.3	26218.6	40797.1	41752.9	39541.6	19029.7	56904.1	56767.4	56966.4	82892.3
M194T196	194.117	196.224	2-methyl-n-(4-methylphenyl)alanine	[M+H]+			Organic acids and derivatives	Carboxylic acids and derivatives	Amino acids, peptides, and analogues	51189.3	61710.3	44757.2	113445	39852.2	56307.3	97242.8	126798	46156.9	63008.5	44793.3	56106.8	81172.2	119183	63432.1	53931.7	51490.3	122905	117324	70298.4	76331.7	92763.9	114641	65986.3	110744	109764	110763	108273
M343T375	343.122	374.962	2-methylene-5-(2,5-dioxotetrahydrofuran-3-yl)-6-oxo--10,10-dimethylbicyclo[7: 2: 0]undecane	[M+K]+			Organic acids and derivatives	Carboxylic acids and derivatives	Dicarboxylic acids and derivatives	15860.8	28752.7	32061.1	29287.8	36763.8	50168.4	44936.3	51422.4	21846.4	52546.6	22772.9	40759.4	24574.5	32941.2	24493.8	24857.3	18414.8	32398.7	51967.6	40701.2	31890.9	41883	41060.5	38089.9	43732.3	43733	43736.9	41074.7
M463T399	463.191	399.381	2-naphthalenecarboxamide, n-[(1s)-2-[4-(5-chloro-2,3-dihydro-2-oxo-1h-benzimidazol-1-yl)-1-piperidinyl]-1-methylethyl]-	[M+H]+			Benzenoids	Naphthalenes	Naphthalenecarboxylic acids and derivatives	15367.7	24296.6	28924.3	25640.9	25373.7	25796	24558.1	23824.5	24047.4	23769.7	23915.3	26849.6	23748.3	20240.4	32246.8	23269.8	22365.6	25575.7	26928.3	25740	31831.5	31370.4	11061.4	25681.1	23905.7	14813.4	23857.4	23895.4
M282T194	282.119	194.272	2-o-methyladenosine	[M+H]+	HMDB0004326	C04779				192988	172102	113797	214876	181556	96757.9	197226	171559	75411.6	155661	181433	91041.6	80822.7	196514	125237	83118.5	89980.6	139230	173872	143206	92177.9	186470	118842	82997.4	167862	170262	166940	167313
M761T40_1	760.58	39.856	2-oleoyl-1-palmitoyl-sn-glycero-3-phosphocholine	[M+H]+	HMDB0007972		Lipids and lipid-like molecules	Glycerophospholipids	Glycerophosphocholines	261440	186761	190420	197694	192285	124562	152427	101885	31153	145400	131492	127508	228868	206097	133451	455931	94915.5	846625	139692	210009	77536.8	115231	470386	106293	233668	273381	269575	297060
M136T293	136.075	293.496	2-phenylacetamide	[M+H]+	HMDB0010715	C02505	Benzenoids	Benzene and substituted derivatives	Phenylacetamides	128103	263066	137771	106494	115100	220575	227477	183964	147157	130907	134884	201230	96199.7	158620	165875	114153	142555	263334	88515.8	276733	166470	142279	163628	164936	209906	196401	211832	212683
M165T90	165.09	89.8545	2-Phenylbutyric acid	(M+H)+	HMDB0000329		Benzenoids	Benzene and substituted derivatives	Phenylpropanes	322704	249120	389059	412668	116393	274039	289949	199978	126069	289241	310228	228043	296297	412282	303058	341144	223826	429778	522177	134814	373522	388442	389720	217336	443131	450614	438960	438980
M219T334	219.133	333.548	2-phenylpiperidine-2-acetamide	[M+H]+			Organic acids and derivatives	Carboxylic acids and derivatives	Amino acids, peptides, and analogues	166557	131718	116931	106267	92733.8	128764	170078	186979	103483	270254	94763.3	136956	148213	158136	117182	149956	137171	257140	234726	223916	155563	216560	142376	166137	192897	192890	194361	203114
M525T445	525.274	445.055	2-piperidinecarboxylic acid, 1-(3,3-dimethyl-1,2-dioxopentyl)-, (1r)-1-(3-aminophenyl)-3-(3,4-dimethoxyphenyl)propyl ester, (2s)-	[M+H]+						43876.9	33400.3	59343.7	51815.8	40303.7	52057.3	32926.1	36022.8	44559.1	28101.2	33164.1	37867.6	35545.6	78162.3	48396.5	40478.5	51041.8	59629	70997.8	38087.7	39788.8	36939.1	51852.9	34589.7	49650.5	47476.2	48257.1	47460.1
M100T54_2	100.075	53.873	2-piperidone	[M+H]+	HMDB0011749	C10482	Organoheterocyclic compounds	Piperidines	Piperidinones	4.16529e+06	7.79269e+06	3.97506e+06	3.53199e+06	4.56052e+06	6.2369e+06	2.33679e+06	1.7995e+06	7.78642e+06	4.34538e+06	4.01358e+06	1.43966e+06	4.02617e+06	4.08374e+06	3.35164e+06	2.07041e+06	3.56858e+06	2.08806e+06	1.7426e+06	4.07937e+06	1.81822e+06	2.91714e+06	4.36203e+06	3.98325e+06	4.24333e+06	4.24299e+06	4.34547e+06	4.24321e+06
M231T338	231.097	337.667	2-pivaloyl-1,3-indandione	[M+H]+		C19141	Benzenoids	Indanes	Indanones	90006.9	88040.9	96346	83002	83268.8	91919.5	93176.9	78811.9	105947	82438.5	101003	22046.7	76845.3	101501	79661.6	14859.9	18036.4	30843.9	35128.6	60386.3	88035.8	37703.9	24445.6	26468.2	82436	80578.9	77330.9	82488.7
M147T91	147.079	90.791	2-tert-butyl-p-quinone	[M+H-H2O]+			Organic oxygen compounds	Organooxygen compounds	Carbonyl compounds	224066	151553	235052	236807	153832	161360	242216	165206	123149	209632	210642	88835.6	208820	301018	79755.1	217711	342993	280116	267590	114885	233535	302855	251743	142808	271483	265063	266606	278801
M156T35	156.138	35.172	2,2,6,6-tetramethyl-4 piperidone	[M+H]+	HMDB0031179	C11037	Organoheterocyclic compounds	Piperidines	Piperidinones	75296	43770.1	34050.3	73424.6	35982.8	49882	102292	94446.4	65011.4	52552.6	58118.6	65481.5	80071.4	74682.5	61165.8	78010.4	85499.7	83369.3	29683.6	32823.7	40336.7	117839	48859.2	37883	70609.9	69194.2	66949.2	56872.7
M389T138	389.136	137.568	2,4-pyrimidinediamine, 5-[[3-methoxy-4-[(4-methoxyphenyl)methoxy]phenyl]methyl]-	[M+Na]+			Benzenoids	Phenol ethers	Anisoles	98935.1	203243	112181	93978.2	69874.9	97818.7	108677	95482.7	80649.7	80792.5	105009	161631	195657	114477	81637.4	90575.5	61187.2	125823	109463	53640.6	89328.2	94760.2	86382.5	63421.1	166330	139277	138771	139257
M307T340	307.093	339.771	2,4(1h,3h)-pyrimidinedione, 6-[4-(3-chlorophenyl)-1-piperazinyl]-3-cyclohexyl-	[M+H-C6H10]+			Organoheterocyclic compounds	Diazinanes	Piperazines	19933.4	20428.9	13156.6	28947.8	21443	14685.3	15297	14649	16623.2	21991.6	20212.9	19116.3	16031.2	23996.6	19278	13297.2	15505.8	37114.1	6094.39	31368.4	21842.5	25885.1	28114.1	19852.6	29921.2	34413.9	33425.4	34423.8
M200T199	200.106	199.036	2,5-dimethyl-1-phenyl-1h-pyrrole-3-carbaldehyde	[M+H]+			Organoheterocyclic compounds	Pyrroles	Substituted pyrroles	100296	88335.4	94960	59018	34160.5	63125.9	97200.3	68834.9	47011.4	108971	64092.3	61749.3	66853.5	81721.7	85034.4	51909.3	30746.9	61813.4	37643.4	35898.5	69863.8	69761.3	46305.6	20360	72665.3	71331.1	71012.4	71753.8
M219T95_2	219.173	95.366	2,6-di-tert-butyl-4-hydroxymethylphenol	[M+H-H2O]+	HMDB0032048		Benzenoids	Benzene and substituted derivatives	Phenylpropanes	91661.6	120461	88892.7	73772.1	115251	92040.7	95427.7	65741.1	114932	59790.8	98571.2	50888.4	135143	102227	49556	82875.5	54172.1	49634.9	76559.7	45126.2	113723	36227.1	55032.5	48847.8	72298.4	81291.8	72271.1	72273.8
M155T288	155.081	287.505	2,6-dimethoxyphenol	[M+H]+	HMDB0034158	C10787	Benzenoids	Phenols	Methoxyphenols	157563	99744	95906.4	73188.1	132367	176288	118562	103341	143712	152882	142244	111879	145864	73237.4	99048.6	174737	136170	85628.6	74105.7	151124	147522	71182.7	90320.9	71658.3	148523	154044	148547	148539
M228T196	228.098	196.262	2'-deoxycytidine	[M+H]+	HMDB0000014	C00881	Nucleosides, nucleotides, and analogues	Pyrimidine nucleosides	Pyrimidine 2'-deoxyribonucleosides	33362.4	45560.5	92268.3	73233.1	56567.1	87013.2	47779	52785.1	38533	60518.1	92300.9	74869.5	77743	88721.9	40471.7	50249.6	60676.3	100739	105464	87964.7	57068.8	87846.8	74833.4	63658.7	84756.7	82891.8	91583.9	82875.7
M253T167	253.092	166.858	2'-deoxyinosine	[M+H]+	HMDB0000071	C05512	Nucleosides, nucleotides, and analogues	Purine nucleosides	Purine 2'-deoxyribonucleosides	1.40171e+06	1.54649e+06	1.26832e+06	1.32798e+06	1.21272e+06	1.18046e+06	1.58767e+06	860959	1.13923e+06	833958	1.55718e+06	866192	1.38201e+06	1.09728e+06	1.40196e+06	706070	1.54568e+06	1.98151e+06	859281	1.72546e+06	828626	1.23895e+06	1.50086e+06	1.01468e+06	2.40313e+06	2.25781e+06	2.40377e+06	2.4033e+06
M212T411	212.092	411.366	2',3'-dideoxycytidine	[M+H]+	HMDB0015078	C07207	Nucleosides, nucleotides, and analogues	Pyrimidine nucleosides	Pyrimidine 2',3'-dideoxyribonucleosides	445940	781980	865902	948394	877122	896263	754276	555387	778495	542805	991482	785891	752718	433755	730905	610924	707340	349013	509383	507277	714106	418922	540234	549398	740758	740747	738851	735736
M309T337_1	309.143	336.515	2',3'-dihydrocephalomannine	[M+H-C25H35NO11]+			Lipids and lipid-like molecules	Prenol lipids	Diterpenoids	109764	231928	239487	243318	141430	264656	226492	306869	218166	179791	209971	287062	214362	195672	107356	211437	294024	16009.8	228486	218777	162403	186705	221049	196254	213900	112996	213808	213845
M329T421	329.154	421.277	2',4,4',6'-tetramethoxychalcone	[M+H]+						35083.2	43890.8	44003.5	39814.7	36935.6	40550.7	36267.5	32574.5	15499.6	42951.2	37569	24502.9	37535.1	39542.6	39090.9	47876.7	38054.4	43395.2	43335.6	38331.3	31519.3	42324.6	33259	36800.4	35503.9	36478.8	36489.4	34015.4
M96T53	96.0435	52.7225	2(1h)-pyridinone	[M+H]+	HMDB0013751	C02502	Organoheterocyclic compounds	Pyridines and derivatives	Hydropyridines	280099	224184	212688	202886	241100	232264	226465	217329	275499	207610	240708	97562.9	320398	269533	112244	196726	191637	177986	203866	130004	185862	194980	195526	182369	222707	216242	218195	216237
M364T209	364.282	209.356	20-hydroxy-n-(2-hydroxyethyl)-5z,8z,11z,14z-eicosatetraenamide	[M+H]+	HMDB0013630		Organic nitrogen compounds	Organonitrogen compounds	Amines	36114	42464.2	28956.1	48784.1	25985.7	28611	35038.6	33680.3	33373.7	22667.4	37574.2	41647.6	27963.6	39249.5	37865.5	28189.4	31315.3	35046.6	40400.8	35105	31128.6	25804.8	36480.5	23157.7	47073.4	47494.6	45795	47495.5
M373T424	373.194	424.041	20-trifluoroleukotriene b4	[M+H-H2O]+			Lipids and lipid-like molecules	Fatty Acyls	Eicosanoids	37066.9	51707	21769.6	26176.5	54453	53081.4	43613.9	37113.4	59317.3	34932.9	49738.3	38303.6	28887.4	39530.5	37916.4	45168.5	18602	41075.4	44916.4	24667.6	35316.2	36806.8	43031.1	39317.4	29381.9	41593	41575.6	41619.7
M479T192	479.222	191.64	21-deacetoxy-11-oxodeflazacort-3,20-hydrazinecarboxamide	[M+H-NH3]+			Lipids and lipid-like molecules	Steroids and steroid derivatives	Pregnane steroids	47560.7	37222.3	48012.7	84712.3	45066.2	43116.4	53665.9	28483.1	51163.9	24942	53670.2	52029	45270.5	66416	48078.3	37433.6	39281	51635.9	54430.8	47340.4	37097.7	41065.2	44182.4	40705.7	52949.8	42913.7	52892.7	53022.8
M809T218_2	809.441	218.066	3-(1h-indol-3-ylmethyl)-6,18-dimethyl-9-(2-methylpropyl)-12-(1-phenylethyl)-15-propan-2-yl-1,4,7,10,13,16,19-heptazacyclotricosane-2,5,8,11,14,17,20-heptone	[M+Na]+			Organic acids and derivatives	Peptidomimetics	Hybrid peptides	14738.3	8416.75	6925.09	9126.3	10423.8	9860.69	17406.8	11233.7	20208	9915.66	19900.3	10943.9	13023.3	10554.4	14036.7	13114	17211.5	19957.5	15955.3	11562.1	12089.5	12284.2	13283.3	11751.8	19046	19025.8	18187.4	13378.3
M144T629	144.08	628.567	3-(2-hydroxyethyl)indole	[M+H-H2O]+	HMDB0003447	C00955	Organoheterocyclic compounds	Indoles and derivatives	Indoles	22306.4	9000.11	9160.84	8960.03	22343.7	9110.77	8455.08	7655.72	9081.62	8378.19	3582.27	8985.67	9358.06	8125.8	4607.81	3047.9	7371.73	7402.88	8646.81	8896.63	8356.75	8534.31	8107.4	8992.03	9945.17	10123.7	10045	10787.2
M431T444	431.175	443.615	3-(2,4-dihydroxyphenyl)-7-hydroxy-6,8-bis(3-methylbut-2-enyl)-2,3-dihydrochromen-4-one	[M+Na]+			Phenylpropanoids and polyketides	Isoflavonoids	Isoflavans	26259.4	30608.5	33426.9	35796.2	30524	45170.3	55111.9	16403.7	28579.8	31352.5	28723.5	68815.9	1.6246e+06	63745.9	45751.3	33740	41514.3	50066.5	45479.1	36564.9	25911.5	30514.7	25521	22767.7	100701	98738.4	97777.5	97787.2
M311T203	311.045	203.389	3-(2,6-dihydroxyphenyl)-4-hydroxy-6-methyl-3h-2-benzofuran-1-one	[M+K]+			Organoheterocyclic compounds	Benzofurans	Benzofuranones	7523.69	10969.5	14640.8	5470.85	8202.29	11074.1	4044.6	8989.18	10061.2	4818.45	11565.5	8737.47	13196.6	899.375	6419.63	9028.02	7524.92	1791.71	2626.83	5866.03	10412.3	5393.66	5983.47	6017.14	1554.8	1584.71	1655.59	1546.12
M197T418	197.055	418.256	3-(4-fluorobenzoyl)propionic acid	[M+H]+			Organic oxygen compounds	Organooxygen compounds	Carbonyl compounds	15683.7	14467	14937.8	10959.8	11161.8	16578.3	16023.5	18619.7	19120.2	21886.8	15731.2	12151.8	15507.3	15240.4	8709.53	14722.2	19857	6328.91	10375.9	15505.3	11141	9934.02	9043.42	9949.73	8363.2	8373.44	8705.81	10081.1
M408T195	408.247	195.088	3-(4,6-dipyrrolidin-1-yl-1,3,5-triazin-2-yl)-1,2,3,4,5,6-hexahydro-8h-1,5-methanopyrido[1,2-a][1,5]diazocin-8-one, 11-(4,6-dipyrrolidinyl-1,3,5-triazin-2-yl)-7,11-diazatricyclo[7.3.1.0<2,7>]tri deca-2,4-dien-6-one	[M+H]+			Alkaloids and derivatives	Lupin alkaloids	Cytisine and derivatives	29894.5	26660.5	35242	26024.4	25458.3	29492	39547.5	27636.1	41764.3	29563.5	35108.3	49991.4	10919.8	29797.9	40637.8	34943.3	45103.7	58099	47217.6	36757.7	30410.8	38205.7	19385.6	32445.9	41097.1	45442.9	41453.8	43793.4
M939T487	939.252	486.963	3-[(2s,3r,4s,5s,6r)-4,5-dihydroxy-3-[(2s,3r,4r,5r,6s)-3,4,5-trihydroxy-6-methyloxan-2-yl]oxy-6-[[(2s,3r,4r,5r,6s)-3,4,5-trihydroxy-6-methyloxan-2-yl]oxymethyl]oxan-2-yl]oxy-5-hydroxy-2-(4-hydroxyphenyl)-6-methoxy-7-[(2s,3r,4r,5r,6s)-3,4,5-trihydroxy-6-methyloxan-2-yl]oxychromen-4-one	[M+Na]+			Phenylpropanoids and polyketides	Flavonoids	Flavonoid glycosides	5111.17	7095.26	5740.95	6361.46	4335.82	6220.55	5939.96	5793.43	767.759	6420.58	6620.76	4201.14	5648.56	6257.94	6213.27	1505.42	2174.95	6239.76	7584.57	4365.83	6051.51	5314.19	2062.83	7575.2	6441.41	6615.38	6298.3	6316.77
M260T171	260.11	171.238	3-acetyl-7-diethylaminocoumarin	[M+H]+						70143.4	41918.3	36132.1	46051.9	25391.5	33510.8	38204.6	38948.2	31631.4	39435.3	44758.3	38783.5	63731.1	40865.8	45277.4	36855.8	31105.4	39314.3	96548.5	47115.3	37177.1	46414.1	42939.5	21613.1	43829.1	41630.5	44240.7	43169.9
M104T51	104.07	51.189	3-aminobutanoic acid	[M+H]+	HMDB0031654		Organic acids and derivatives	Carboxylic acids and derivatives	Amino acids, peptides, and analogues	38380.6	27585.7	41461.3	95319.1	41022.8	35243.7	42408.6	64115.6	49373.7	87629.6	45601.8	20684.8	35210.9	112021	28715.2	32809.3	58189.6	46488.3	131065	42260.5	36593.2	421934	120971	94935.8	96999.8	89900	87075.5	87677.9
M95T142	95.0597	141.751	3-aminopyridine	[M+H]+			Organoheterocyclic compounds	Pyridines and derivatives	Aminopyridines and derivatives	178068	246499	148863	157917	292859	131042	192347	279918	156384	496865	142638	263829	140429	1.01368e+06	213261	122692	89008.7	311483	266592	365158	599776	501232	203226	532696	364332	316533	316566	317116
M214T347	214.07	346.624	3-Aminosalicylic acid	(M+CH3COO+2H)+	HMDB0001972		Benzenoids	Benzene and substituted derivatives	Benzoic acids and derivatives	42220.9	30374.9	39051.4	41558.9	46183.8	38722.2	28517.4	37179.6	38961.8	32349	28362.7	42969.1	38967.3	35247.3	40388.7	35803	45222.6	40667.3	37426.7	33148	33908.2	35189.1	44254.7	29569.6	53415.3	53339.4	47557	50621.2
M555T295	555.279	294.921	3-deacetylsalannin	[M+H]+			Lipids and lipid-like molecules	Prenol lipids	Triterpenoids	197549	176068	189682	177870	201774	266722	416535	407109	115950	228532	135558	180895	170843	152568	180939	170132	105793	553116	271954	243716	328825	150928	256147	324379	362973	382104	382182	373754
M116T219	116.106	218.89	3-dehydrocarnitine	[M+H-CO2]+	HMDB0012154	C02636	Organic acids and derivatives	Keto acids and derivatives	Short-chain keto acids and derivatives	44445.4	11263.6	7732.36	8291.04	7567.97	11961.8	17533.5	22794.2	7567.6	54092.5	8213.22	24661.5	9343.24	18664.1	15722.1	13937.2	8963.41	29530.9	16011.7	16117.1	6426.3	54583.8	31462	15971.5	21982.8	21237.7	21242.3	21613.6
M126T65	126.054	65.2455	3-hydroxyacetaminophen	[M+H-C2H2O]+			Benzenoids	Benzene and substituted derivatives	Anilides	401048	275232	245263	350479	302336	335942	365053	439661	286433	373303	321565	154886	326390	342474	167353	269145	306964	295190	416874	246576	401297	328128	299348	349779	359474	351291	342530	372167
M154T385	154.049	384.922	3-hydroxyanthranilic acid	[M+H]+	HMDB0001476	C00632	Benzenoids	Benzene and substituted derivatives	Benzoic acids and derivatives	45297.2	21922.1	21811.1	24538.2	34477.6	28893.4	29049.1	28257.3	19100.6	25536.9	29414	29124.4	29686.5	23827.9	10662.9	14782	65864.8	25784.9	20650	26750.5	24792.2	23941.8	24101.5	21861.4	21175	20431	20604.9	20430.2
M101T353	101.059	352.518	3-hydroxyisovaleric acid	[M+H-H2O]+	HMDB0000754		Lipids and lipid-like molecules	Fatty Acyls	Fatty acids and conjugates	15764.7	39361.3	19560.3	1176.91	27646.7	68933.8	21816.8	15236.1	30836.6	20726	41497.3	48917.7	26577.5	11755	21209.1	54663.3	60763.6	20578.2	642.168	18706.2	23561.4	13819.7	13200.9	17506.8	28214.5	33428	26185.8	26302.9
M185T203	185.127	203.393	3-Methoxytyramine	(M+NH4)+	HMDB0000022	C05587	Benzenoids	Phenols	Methoxyphenols	45199	52850.6	50296.9	55130.1	49761.5	58694	78645.6	155212	17585	34242	25207.4	109493	15251.5	43202.8	63236.2	42266.8	72657.4	258439	69755.5	117728	60245.1	100843	111615	95031	100914	100899	97861.4	99766.5
M339T368	339.154	368.429	3-methyl-l-histidine	[2M+H]+	HMDB0000479	C01152	Organic acids and derivatives	Carboxylic acids and derivatives	Amino acids, peptides, and analogues	64750.8	85260.1	73701.8	98220.1	90929.6	124777	108371	86804.6	95884.8	138474	68613.1	109737	80253	102245	120356	128329	165282	102818	103852	197904	78432.8	162023	98147.5	95576.2	122032	121462	122774	121526
M579T141	579.309	140.756	3-methylglutarylcarnitine	[2M+H]+	HMDB0000552		Lipids and lipid-like molecules	Fatty Acyls	Fatty acid esters	69255	75537.4	54866.6	43907.1	54223	30032.7	47949.5	86331.2	32488.1	41635.9	38488.1	49818.4	21571.7	40983.1	50604.7	29494.6	45450.9	43745.3	60392.5	57802.4	36049.2	47653.4	33783.6	47972.3	37181.5	43855.2	43880.5	43822.9
M119T161	119.034	160.81	3-methylhippuric acid	[M+H-C2H5O2N]+	HMDB0013245		Organic acids and derivatives	Carboxylic acids and derivatives	Amino acids, peptides, and analogues	480214	452516	410534	412665	270124	374998	346356	401919	293767	355891	447655	269920	444131	462162	493357	364940	492125	517773	393725	588620	383620	456515	515381	450639	389155	469437	455405	469274
M126T99	126.102	98.55	3-methylhistamine	[M+H]+	HMDB0001861		Organic nitrogen compounds	Organonitrogen compounds	Amines	69398.6	52187.2	62104.4	84365.9	56585.6	99876.8	34059.6	77747.7	62372.1	71106.9	63583.7	23882.1	25422.4	32724	13004.5	29390.7	17379.1	32783.4	37962.5	86738.6	28178.6	89925	19708.6	59100.5	68398.4	48037.9	48451.7	48293.2
M170T387	170.091	387.327	3-Methylhistidine	[M+H]+	HMDB0000479	C01152	Organic acids and derivatives	Carboxylic acids and derivatives	Amino acids, peptides, and analogues	60669.8	65721.9	42068.8	44837.1	48597.3	70803	76979.5	46122.4	75877.6	89212.5	71490.4	44943.1	57013.5	59838.8	48893.1	56678.9	50085.5	64083.3	63944.9	68411.6	63624.9	101565	37011.1	73820.9	77868.2	69890.5	71669.9	64901.9
M533T364	533.215	363.595	3-pyridineacetonitrile, .alpha.-[(3,4-dimethoxyphenyl)methylene]-, (.alpha.z)-	[2M+H]+			Benzenoids	Benzene and substituted derivatives	Methoxybenzenes	103858	21457.7	58109.6	38478.4	59913.9	53210.5	63425.1	105485	81178.9	13321	68796.3	32945.2	92169	60797.3	24365.1	25439.4	62527.5	131927	84912.3	58158.3	42445.6	77705.3	105306	73651.1	67652.4	67624	68802.1	68784.4
M138T263	138.054	262.917	3-pyridylacetic acid	[M+H]+	HMDB0001538					108447	146551	158166	89561.9	78007	136110	107760	120917	154950	181849	140872	318022	101993	152819	120249	134576	118620	151291	156175	273280	119553	164115	198874	173639	186008	190968	187902	197391
M435T243	435.294	242.868	3-quinolinecarboxamide, 1,4-dihydro-6-(1-methylethyl)-4-oxo-1-pentyl-n-tricyclo[3.3.1.1(3,7)]dec-1-yl-	[M+H]+			Organoheterocyclic compounds	Quinolines and derivatives	Quinoline carboxamides	251785	304500	272202	263837	250631	254549	241130	214402	313306	255464	280186	292874	61921	262451	283804	66240.5	267214	219316	257920	282503	67097.3	196719	261259	224283	234816	233194	237821	231686
M511T296	511.252	296.074	3-quinolinecarboxamide, 6-(2-furanyl)-1,4-dihydro-8-methoxy-4-oxo-1-pentyl-n-tricyclo[3.3.1.1(3,7)]dec-1-yl-	[M+Na]+			Organoheterocyclic compounds	Quinolines and derivatives	Quinoline carboxamides	27910.1	54451.5	21194.9	55163.2	48270.4	47521.9	31199.4	33232	44363.8	30055	48481.6	51843	45594.5	35684.5	33291	49793.6	20185.7	99502.8	89267.4	64921.8	47818.8	66949	64222.6	60220.7	50887.8	51083.1	54602.1	58598
M218T360	218.137	359.748	3,3-Dimethylacrylic acid	(2M+NH4)+						207518	195736	177942	206501	234882	362164	183294	152314	341738	176541	225559	300819	318998	106772	186933	175414	161912	106396	227638	175603	197782	83883.9	154123	229815	217225	233573	217147	233634
M195T135	195.086	135.124	3,4,2',4',6'-pentamethoxychalcone	[M+H-C10H12O2]+						84607.2	132926	116389	94425.2	106397	4394.82	110571	135953	52057.7	116871	93846.5	73082.6	101545	142671	64476.6	98259.4	106789	187583	140435	51417.2	101327	65110.7	107990	99820.9	123897	116610	124151	102891
M363T35	363.309	35.254	3,6,9,12-tetraoxatetracosan-1-ol	[M+H]+			Organic oxygen compounds	Organooxygen compounds	Ethers	819913	755798	748098	670412	790307	877323	746655	838760	1.01662e+06	902780	689480	541338	827811	715393	540392	662340	738619	697049	854442	686242	780651	791573	885133	831930	797181	849430	797540	797437
M466T352	466.288	352.064	3.beta.,5.beta.-tetrahydrocortisone 3,21-diacetate	[M+NH4]+			Lipids and lipid-like molecules	Steroids and steroid derivatives	Steroid esters	165302	34332.6	104086	196047	117254	68797.5	49692.3	95580.5	123678	152478	106075	53555.1	134343	154239	97771.1	97094.8	142434	188560	137065	118595	91973.4	159923	142630	120819	137546	135373	135368	135370
M675T437	675.245	437.209	3'-.alpha.-sialyl-n-acetyllactosamine	[M+H]+			Organic oxygen compounds	Organooxygen compounds	Carbohydrates and carbohydrate conjugates	11447.2	26572.8	14407.6	24117	19081.2	34069.6	18612.4	16918.4	12426.4	11595.6	16940.8	20291.1	26201.6	25409.7	4089.42	14135.1	20996.1	16596.8	12912.6	31672.8	9345.64	24022.8	15889.8	14686.7	20932.7	20921.3	20063.1	20492.2
M493T445	493.163	444.947	3'-fucosyllactose	[M+Na-H2O]+	HMDB0002094		Organic oxygen compounds	Organooxygen compounds	Carbohydrates and carbohydrate conjugates	15693.5	6034.3	19210.6	46920.2	21544	21340.8	9670.09	17823.4	10491.6	20792.7	6370.69	3878.44	10915.3	17245.9	13584	19087.9	19790.4	4686.69	23389	21907.5	21445.1	19958.8	6629.97	18138.4	9973.37	10389.3	10382	9056.89
M509T467	509.145	466.632	3'-galactosyllactose	[M+Na-H2O]+	HMDB0006599		Organic oxygen compounds	Organooxygen compounds	Carbohydrates and carbohydrate conjugates	7701.66	25677.4	14108.1	5732.42	12430.3	10935.2	6551.64	8147.82	32075.9	7392.93	12178.1	5843.28	22686.3	6713.72	15896.8	19398.2	18530	1941.01	7882.92	14697.4	22725.3	7403.61	10098.3	15513.2	5812.79	6233.67	8230.72	5823.13
M258T206	258.11	205.692	3'-O-methylcytidine	[M+H]+						45437.7	36382.4	68501.5	39809	33036.9	58429.1	60817.2	39162.7	22114.7	44500.9	45107.5	36706.7	64486.1	47256.4	47801.7	31034.8	35050.5	64398.1	52752.4	66147.2	33337.2	46660.6	48201.8	31867.1	75963.7	78724.3	78680.3	64375.4
M298T274	298.114	273.88	3'-o-methylguanosine	[M+H]+	HMDB0006038		Nucleosides, nucleotides, and analogues	Purine nucleosides		48984.6	39470.1	26617.7	58183.8	40991.5	28809.4	53986.3	38679.3	20071.6	35923.8	42934.1	62213.1	23206.2	44267.4	39253.7	24479.4	31216.5	31550.1	47527.2	38470.6	30089.7	61215.9	35279.2	25326.6	41984	41910.3	44526.5	54424
M194T376	194.08	376.064	3',4'-methylenedioxy-n-tert-butylcathinone	[M+H-C4H8]+						25444.5	9530.48	44156.7	22993.2	9344.49	17703.6	15376.8	20717.9	13400.3	21500.6	17830.4	17845.3	29303.1	12979.4	10055	13686.4	14951.5	23591.6	21729	15104.9	14337	22816.5	14961.1	12101.4	17529.5	16770.3	17225.7	18044.5
M513T403	513.119	403.081	3',4',6-trimethoxyisoflavone-7-o-.beta.-d-glucopyranoside	[M+Na]+			Phenylpropanoids and polyketides	Isoflavonoids	Isoflavonoid O-glycosides	5847.6	8269.19	5488.74	3942.05	3221.22	6234.2	4598.07	5952.07	3993.52	12216.1	10878	18786.3	6491.84	3049.16	3604.9	7540.95	5497.51	4552.82	6713.07	2206.39	6996.1	10430.2	10162.1	11215.1	5891.89	4687.87	5950.54	5514.35
M493T205	493.26	204.841	3beta-hydroxydeoxodihydrodeoxygedunin	[M+Na]+						47180.2	39448.3	33331.3	69210.6	43904.8	34736.2	52891.5	38600.7	36067.8	35602.7	37982.9	45045.3	30046.8	43663.7	49598.3	42696.6	42836.4	75261.1	62768.5	36390.3	39028.7	50355.4	52033.4	42547.4	65109.1	70394.2	66895.2	65100.7
M184T345	184.094	345.461	4-(4-aminophenoxy)aniline	[M+H-NH3]+		C14759	Benzenoids	Benzene and substituted derivatives	Diphenylethers	9517.33	14536.6	9257.34	98246.1	11415.1	11482.5	10567.9	86278.6	10046.7	76411.2	9369.08	11137.9	73486	77379.5	7559.54	9535.05	82247	76457.4	93969.3	11634.3	108908	70836.2	97421.8	70138	16767.7	18299.8	17976.2	32744.8
M212T141	212.142	140.542	4-(tert-butylamino)-6-ethylamino-5h-1,3,5-triazin-2-one	[M+H]+			Organoheterocyclic compounds	Triazines	Aminotriazines	108044	157938	108200	131730	38322	106039	110585	84879.8	80458.5	98830.5	124098	98564	94647.2	213481	185524	23998.8	38787.2	112739	131673	58792.1	183933	148210	123778	46231.1	125645	125901	131641	140867
M599T443	599.177	442.752	4-[3,4,5-trihydroxy-6-(hydroxymethyl)oxan-2-yl]oxy-9-(3,4,5-trimethoxyphenyl)-5a,6,8a,9-tetrahydro-5h-[2]benzofuro[6,5-f][1,3]benzodioxol-8-one	[M+Na]+						25596	9302.22	35330.5	15016.8	14462	7307.2	6509.47	11273.2	8496.4	13305.1	16310.5	19011.4	13880.8	10503.2	10704.4	18001.3	12624.9	8229.35	13238.6	3183.37	13927	8953.94	11719	10661.8	9976.29	10351.4	9138.37	10141.5
M478T189	478.289	188.661	4-[5-[[4-[5-[acetyl(hydroxy)amino]pentylamino]-4-oxobutanoyl]-hydroxyamino]pentylamino]-4-oxobutanoic acid	[M+NH4]+			Lipids and lipid-like molecules	Fatty Acyls	Fatty amides	58149.7	60162.5	47406.2	39583.3	31429.6	27516.9	67447.6	12625	51555.7	57742.6	58354.5	38983.8	58638.3	43302.1	54487.8	55621.8	23347	89242.6	38330.3	47286.3	15300.1	49919.4	58175.9	22345.3	62043	63671.9	62051.3	70598.2
M146T396	146.08	395.596	4-acetamidobutanoate	(M+H)+						170511	27203.6	195154	21225	27435	27817	8984.6	40399.9	20480.7	26656.9	38442.6	12639.6	124066	28721.5	133278	17223.6	55028.6	124594	130451	138693	16673.5	41695	46824.4	79652.9	40835.1	52939.6	58312.5	25631
M132T370	132.101	369.783	4-amino-4-methylpentanoic acid	[M+H]+			Organic acids and derivatives	Carboxylic acids and derivatives	Amino acids, peptides, and analogues	135657	292816	166070	118482	129359	220197	406600	568204	127865	426842	237235	162624	120282	377891	173383	226166	269876	588239	263465	390059	332140	399301	277034	291700	287004	281857	278742	278730
M137T142	137.093	141.746	4-aminobenzamide	[M+H]+			Benzenoids	Benzene and substituted derivatives	Benzoic acids and derivatives	49410.7	54270.6	34343.9	47627.5	49966.4	46492.7	32073.7	43830.9	35286.2	58938.1	34290.4	30848.8	30066.8	60311.6	7390.07	34894	34259.4	49877.1	51176.2	20281	10258.7	83465.7	53202.9	26189.8	53112.8	53124.1	49924.9	52198.7
M138T243_2	138.054	242.731	4-aminobenzoate	[M+H]+	HMDB0001392	C00568	Benzenoids	Benzene and substituted derivatives	Benzoic acids and derivatives	235766	368878	380005	176366	195723	457361	269435	230387	277714	469695	300918	714312	240991	334814	414005	329283	310556	567931	544837	717073	265729	591245	737992	382624	501839	470640	467918	467603
M110T53	110.059	52.68	4-aminophenol	[M+H]+	HMDB0001169	C02372	Benzenoids	Benzene and substituted derivatives	Aniline and substituted anilines	130460	96267.5	164756	130230	139356	118424	149187	115149	76256.5	99055.1	114431	57005.4	106650	101453	62409.1	84763.1	85653.6	100735	115282	87776.8	119073	95980.9	124204	142745	117672	117642	125055	119729
M267T174	267.158	173.852	4-androsten-11.beta.-ol-3,17-dione	[M+H-2H2O]+	HMDB0006773	C05284	Lipids and lipid-like molecules	Steroids and steroid derivatives	Androstane steroids	67457.6	62126.2	76090	75928.1	58035	63928.2	69556.2	79434.8	69408.1	80318.8	66291.4	64342.1	97297.8	85600.8	70148.7	61697.6	68670.7	61179.7	89693.3	76765.5	86257.4	43865.1	85137.9	40847.7	77869.2	82228.8	82217.9	81906
M487T307	487.253	307.356	4-androsten-17.beta.-ol-3-one glucosiduronate	[M+Na]+	HMDB0003193	C11134	Lipids and lipid-like molecules	Steroids and steroid derivatives	Steroidal glycosides	46614.8	15531.1	22548.3	60569.5	49257.2	35963.9	39317.5	45668	22058.5	35884.2	25495.1	17412.9	39523.2	57577	44509	49724.9	70105.4	42845.4	68605.1	19625.5	50569.7	46058.3	49983.9	26445	75159	88528	76149.7	75489.1
M251T180	251.174	180.436	4-androstene-11.beta.,17.beta.-diol-3-one	[M+H-3H2O]+	HMDB0060339	C18075	Lipids and lipid-like molecules	Steroids and steroid derivatives	Androstane steroids	200257	131993	99183.8	141600	69927.7	131224	209813	90291.9	153499	114667	128327	118145	142526	127818	143289	125890	77529.6	198511	148782	88001.4	86266.2	135944	163561	57328.5	251628	251708	280208	259950
M109T245	109.075	244.632	4-anisaldehyde	[M+H-CO]+	HMDB0029686	C10761	Benzenoids	Benzene and substituted derivatives	Benzoyl derivatives	33360.8	38637.6	27691.7	21087.9	27226.1	26877.7	31075	37983.6	18694.3	39245.7	31370.7	26602.7	23032.9	36212.7	26667.9	32845.2	23850.1	17698.5	19858.6	25318.4	43170.4	27738.4	32633.9	21177.4	29988.4	30492.2	30300	29508.5
M336T200	336.159	199.635	4-chloro-2,5-dimethoxy-n-[(2-methoxyphenyl)methyl]benzeneethanamine	[M+H]+			Benzenoids	Benzene and substituted derivatives	Methoxybenzenes	500809	549308	576778	547650	420675	523675	466841	421805	555199	442074	513220	543587	470029	543839	608592	494165	543003	470435	554484	457834	473456	476796	563330	394360	525403	531364	522638	522651
M385T34	385.344	33.913	4-cholestenone	[M+H]+	HMDB0000921	C00599	Lipids and lipid-like molecules	Steroids and steroid derivatives	Cholestane steroids	203057	136710	249311	141598	221794	236374	189681	155103	232698	323056	181535	189818	187588	266052	436234	260182	217376	140808	388791	198556	217171	350331	215184	306530	219605	227424	233982	223634
M154T85	154.085	84.757	4-deoxypyridoxine	[M+H]+			Organoheterocyclic compounds	Pyridines and derivatives	Methylpyridines	217788	103162	112022	78007.6	94066.4	146415	64974.1	82129.2	88902.2	78235.3	106864	50188.2	126021	81328.1	64549.3	93413.2	110190	105065	78345.2	58551.9	97474.4	87888.5	81475.8	65122.7	148568	147346	167244	162436
M155T112	155.106	112.197	4-hydroperoxy-2-nonenal	[M+H-H2O]+	HMDB0060287		Organic oxygen compounds	Organooxygen compounds	Carbonyl compounds	49389.6	40820.2	28510.7	26365.3	37501.7	43192.7	52314.6	47941.3	34318.5	37419	44490.5	33866.1	34390.2	27743.2	31420.4	41330.3	42506.1	41606.5	49179.8	31151.6	50068.5	27899.6	44965.4	43353.2	45109.8	45343	45347.6	42838.3
M202T96_2	202.18	95.533	4-hydroxy-1-(2-hydroxyethyl)-2,2,6,6-tetramethylpiperidine	[M+H]+						1.4671e+06	1.10078e+06	1.43177e+06	983389	1.02887e+06	1.19798e+06	1.54416e+06	1.38439e+06	924327	979942	1.20874e+06	1.47395e+06	1.22762e+06	1.21736e+06	950199	962177	1.22057e+06	1.477e+06	1.21729e+06	1.4714e+06	944394	1.01132e+06	901293	808884	1.27787e+06	1.28426e+06	1.28495e+06	1.24969e+06
M153T162	153.04	162.467	4-hydroxy-2-methoxybenzaldehyde	[M+H]+			Benzenoids	Phenols	Methoxyphenols	339304	229233	307993	144760	206174	253267	154266	58639.8	269038	155828	219984	202195	204616	123457	218060	143281	163070	2567.83	77360.7	168440	104736	95104.1	128504	67792.3	222209	215167	213095	213084
M168T381	168.076	380.609	4-hydroxy-l-phenylglycine	[M+H]+		C03493	Organic acids and derivatives	Carboxylic acids and derivatives	Amino acids, peptides, and analogues	59608.5	86964.3	71672.2	75643.6	52917.2	71961.5	81694.3	56974.7	82814.3	51004.8	110477	82354.4	61618.4	72851.2	108537	101727	85357.6	93809.2	71444.2	79553.8	100641	87652.3	63368.7	72380.3	120976	120900	121036	102593
M557T326	557.235	325.796	4-hydroxyatorvastatin lactone	[M+H]+			Organoheterocyclic compounds	Pyrroles	Substituted pyrroles	17757.2	24553.3	19760	19236.8	28094.5	16999.5	16319.2	30562.5	29832.9	27147.8	42171.1	17550.2	17115	21265.7	13814.1	29005	24795.8	16168	33632.6	23508	16218.7	19977.6	20898.3	26923.2	26713	23374.1	27027.2	27075.2
M530T359	530.325	359.082	4-hydroxyphenylmaraviroc	[M+H]+						8113.46	16985	8847.41	8498.93	9165.99	6854.5	23248.9	9201.09	8753.2	20641.4	8328.7	8825.09	9771.47	13117.6	7588.61	7595.7	8994.55	30091.7	19640.9	20136.4	1052.98	20436.6	14541	23475.7	10206.8	10099.5	10075.7	3875.83
M121T279	121.039	279.469	4-imidazoleacrylic acid	[M+H-H2O]+	HMDB0000301	C00785	Organoheterocyclic compounds	Azoles	Imidazoles	66078.8	164477	114316	106605	101989	169333	181021	116476	64905.8	147698	86761.6	127630	79165.7	167243	79107.1	71685.1	109200	179886	50476.1	181258	66217.5	52845.4	98423.9	124542	132666	132667	132510	131954
M460T295	460.302	295.108	4-imidazolidineheptanoic acid, 3-[(2-cyclohexyl-2-hydroxyethyl)amino]-2,5-dioxo-1-(phenylmethyl)-	[M+H]+			Organoheterocyclic compounds	Azolidines	Imidazolidines	43006.3	37042.8	39305.3	49693.1	42705.5	40051.4	36865	36529	37235.5	34832.1	39931.7	34072.8	49524.4	55940.6	60737.3	54512.8	48517	50196.9	64356.5	40137.4	33033.3	67139	50709.2	34737	58109	53013.4	54487.5	52319.2
M232T362	232.153	361.846	4-methyl-.alpha.-pyrrolidinobutiophenone	[M+H]+			Organic oxygen compounds	Organooxygen compounds	Carbonyl compounds	39277.1	55322	49961.6	74541.5	88814.1	37899.5	34715.2	37943.5	44997.9	41695	78450.9	55173.3	54896	38187.8	61750.5	51688.4	58782.4	50450.1	54110.7	32834.8	61002.6	45608.7	66971.8	40134.3	55432.8	53016	54916.1	50514.7
M199T77	199.106	76.51	4-nitrosodiphenylamine	[M+H]+		C19479	Benzenoids	Benzene and substituted derivatives	Aniline and substituted anilines	596364	462333	280388	479714	377131	461413	419762	549302	410650	531679	469077	118479	456484	584070	328999	442173	452240	491908	545964	265708	500292	551516	484343	321810	295845	434829	433077	433285
M109T42	109.1	41.904	4-oxo-2-nonenal	[M+H-CH2O2]+	HMDB0060285		Organic oxygen compounds	Organooxygen compounds	Carbonyl compounds	119323	137969	170466	99943.4	190015	241643	102223	116777	123666	135256	240461	88765.1	258866	151438	115173	109299	86170.7	239774	113062	72503.2	128143	224625	209553	131598	209506	209586	209656	159517
M242T254	242.099	254.469	4-penten-1-one, 3,3,4-trimethyl-1-[1-[(tetrahydro-2h-pyran-4-yl)methyl]-1h-indol-3-yl]-	[M+H-C7H14]+			Organoheterocyclic compounds	Indoles and derivatives	N-alkylindoles	189444	127828	155484	145635	131255	145500	151942	144519	95330	155370	126535	163511	138063	182342	156703	173161	166620	144434	171001	233778	131596	170278	168974	147694	126220	126418	125773	126086
M129T518	129.101	518.138	4-piperidinecarboxamide	[M+H]+	HMDB0000661	C00489	Organoheterocyclic compounds	Piperidines	Piperidinecarboxylic acids and derivatives	44137.8	45038.9	37965.4	34657	38523	46326.5	46102	44091.8	49605.7	49745.4	44170.9	49359	40984.7	49341.4	48956.4	40583.9	39103.8	53129.6	35327.2	52086	50407	34256.8	45786.9	38039.3	57247.2	62500.7	52942.8	53401
M379T407_2	379.202	406.759	4-pregnen-6.beta.,11.beta.,17,21-tetrol-3,20-dione	[M+H]+			Lipids and lipid-like molecules	Steroids and steroid derivatives	Hydroxysteroids	18315.8	15168.6	17218.3	22407.6	19558.3	22697.8	18555	16391.2	17904	16066.5	18966.3	14236.7	16776	17349.2	19663.3	14728.5	19147.9	18332.5	17573.1	16807.7	20162.9	17236.8	16681.8	16800.2	21057.1	18507.3	19850.9	19767.9
M491T416	491.291	415.552	4-quinazolinamine, 2-(hexahydro-4-methyl-1h-1,4-diazepin-1-yl)-6,7-dimethoxy-n-[1-(phenylmethyl)-4-piperidinyl]-	[M+H]+			Organoheterocyclic compounds	Piperidines	Benzylpiperidines	7042.03	4946.48	4717.23	6084.4	7207.5	6154.94	6909.95	4600.38	6227.16	5747.79	4329.55	6746.91	5301.12	7811.63	10317	10250	5949.21	5952.68	6628.71	9455.56	10148.1	8870.95	8464	7118.33	4554.78	4535.88	4316.28	4134.07
M486T286	486.335	286.121	4-quinazolinamine, 7-[3-(dimethylamino)propoxy]-2-(hexahydro-4-methyl-1h-1,4-diazepin-1-yl)-6-methoxy-n-(1-methyl-4-piperidinyl)-	[M+H]+			Organoheterocyclic compounds	Diazanaphthalenes	Benzodiazines	19068.1	2619.53	3033.87	6383.37	19170.6	14009.9	6906.24	7332.16	17071.5	16364.1	15572.9	12179.2	15492.1	17736.5	10181.2	20363.4	7596.04	27954	13474.1	15277.7	6896.93	16115.5	21870.1	31430.9	11714.2	13030.1	13025.1	12669.8
M341T326	341.241	325.565	4,5-epoxy-7z,10z,13z,16z,19z-docosapentaenoic acid, methyl ester	[M+H-H2O]+			Lipids and lipid-like molecules	Fatty Acyls	Fatty acids and conjugates	24149	16062.2	20067	10900.9	17703.9	14260.2	15286.6	9841.36	17194.6	4414.41	15782.8	14439.6	11097.5	26226.8	10850.9	8166.68	6704.04	24729.7	24152.9	24618.1	16467.3	21004.7	4842.07	6482.22	10734.8	14482.6	9249.59	9406.8
M225T72	225.061	72.1935	4,6-dihydroxypyrimidine	[2M+H]+			Organoheterocyclic compounds	Diazines	Pyrimidines and pyrimidine derivatives	35971.8	34475.5	24856.9	8555.84	29270	24080.1	22487.1	11196.2	37513.1	21025	26537.7	13602.8	20927.4	24097.4	19563.8	24183.2	23489.7	14015.5	11453.8	25105.1	23931.3	19246.2	17821.2	27355.3	24516.6	27061	23810.9	23880.6
M707T379	707.214	378.912	4.alpha.-mannobiose	[2M+Na]+			Organic oxygen compounds	Organooxygen compounds	Carbohydrates and carbohydrate conjugates	12103.3	8097.39	8182.22	8889.87	10620.6	16717.2	20473.4	20138.5	4167.87	9479.65	6980.36	9272.84	6015.89	9288.32	6194.82	6362.54	9720.12	7954.86	20246	9794.93	7689.33	3917.47	11277.8	13346.5	7178.36	6045.23	6404.76	8071.28
M453T68	453.153	67.6825	4'-o-.beta.-d-glucosyl-5-o-methylvisamminol	[M+H]+			Organoheterocyclic compounds	Benzopyrans	1-benzopyrans	239233	262898	245478	139964	241077	267875	384921	224229	195980	274939	253673	1.33029e+06	265119	176833	620568	236868	193291	287921	148661	444870	244238	143866	187470	158440	225255	225090	225092	267121
M408T293_2	408.212	292.624	4''-trans-hydroxycilostazol	[M+Na]+			Organoheterocyclic compounds	Quinolines and derivatives	Quinolones and derivatives	51426.2	42250.2	53102.4	71687.9	57121.6	48781.8	65130.4	52532.9	42240.8	46043.6	42972.9	51326.4	17581.1	42954.2	54631.3	54762.1	65713.8	137310	73118	55637.7	48982.5	59320.2	63942.8	94750.6	107850	111887	122856	108077
M151T256	151.085	256.154	4`-aminoacetanilide	[M+H]+			Benzenoids	Benzene and substituted derivatives	Anilides	25295.6	25974.1	29983.6	24988.9	21292.3	48524.1	23441.7	28821.2	42954.9	27211.6	24352.5	26315.3	23807.5	29216.4	29187.2	25788.6	33398.1	28231	25910.7	19618.8	28245.1	44097	41728.2	20246.5	34151.3	28457.4	30151.9	28868.6
M424T248	424.138	248.254	4h-[1,2,4]triazolo[4,3-a][1,4]benzodiazepine-4-acetamide, 6-(4-chlorophenyl)-n-ethyl-8-methoxy-1-methyl-, (4s)-	[M+H]+			Organoheterocyclic compounds	Benzodiazepines	1,4-benzodiazepines	14957	42012.4	14348.8	15948.3	45492.3	59882.8	39014	15478.7	83292.7	23618.5	55460.8	51098.8	16567.3	13299	8377.78	9152.57	17687.8	10439.7	15343.3	16921.4	26802.5	16708.6	2592.58	2724.16	17459.9	19334.6	17464.6	17862.2
M598T361	598.321	360.89	5-[[4-[5-[[4-[5-[acetyl(hydroxy)amino]pentylamino]-4-oxobutanoyl]-hydroxyamino]pentylamino]-4-oxobutanoyl]-hydroxyamino]pentanoic acid	[M+Na]+			Lipids and lipid-like molecules	Fatty Acyls	Fatty amides	13138.6	15016.7	18643.9	20994.2	22182.9	27534.8	21444.7	44044.8	16873.7	20290.3	17964.3	17148.9	20436.7	26802.9	23177.8	21502.2	21678.4	18360.6	18063	20763.7	27021.7	28347.1	23037.7	20643.6	13445	18856.9	16372.3	20159.6
M401T376	401.208	375.958	5-[5-(acetyloxymethyl)-1,2,4a-trimethyl-7-oxo-3,4,8,8a-tetrahydro-2h-naphthalen-1-yl]-3-methylpentanoic acid	[M+Na]+			Lipids and lipid-like molecules	Prenol lipids	Diterpenoids	269739	282650	410479	384180	196716	219080	81294	429065	157737	214747	260329	272514	112546	476513	313207	778126	287379	310149	458295	416191	135638	505614	466705	364467	273402	346085	317175	274273
M114T53	114.054	52.609	5-aminolevulinic acid	[M+H-H2O]+	HMDB0001149	C00430	Organic acids and derivatives	Carboxylic acids and derivatives	Amino acids, peptides, and analogues	103599	85201.5	75391.1	56932.6	99129.7	99044.1	60101.7	50285.6	96013.6	83277.5	112250	44326.5	67400	70061	51412.1	59039.2	54969	47193	38829.5	50256.6	51375	47377.7	76486.7	40557.8	64192.9	65425	67974	61986
M159T258	159.113	257.52	5-Aminopentanoic acid	(M+CH3CN+H)+	HMDB0003355	C00431	Organic acids and derivatives	Carboxylic acids and derivatives	"Amino acids, peptides, and analogues"	124737	17264.9	9626.02	15036.3	9478.63	64196.5	17091.5	63047.1	18296.6	61634.8	12691.6	74291.2	8100.85	16015.2	15231.4	11747.6	35754.2	38868.3	17861	10078.4	10795.4	58839.7	15192.2	120225	50132.9	40317.3	55923.2	28116.9
M118T377	118.085	377.015	5-aminovaleric acid	[M+H]+	HMDB0003355	C00431	Organic acids and derivatives	Carboxylic acids and derivatives	Amino acids, peptides, and analogues	210845	266614	182039	161662	158914	234838	220318	237847	146233	257257	164977	156628	99428.1	183044	121833	137561	164366	238208	341650	253419	163623	209111	183869	481218	227332	231150	225749	225730
M160T378_1	160.134	378.413	5-aminovaleric acid betaine	[M+H]+			Lipids and lipid-like molecules	Fatty Acyls	Fatty acids and conjugates	8.70744e+06	1.3701e+07	1.38402e+07	7.23938e+06	1.49176e+07	9.55365e+06	9.86838e+06	7.93776e+06	1.51965e+07	8.5816e+06	7.87752e+06	7.52796e+06	1.09487e+07	8.62011e+06	1.84579e+07	1.59398e+07	1.68599e+07	1.01972e+07	7.55456e+06	1.50844e+07	8.01432e+06	5.85333e+06	1.57711e+07	9.64939e+06	1.17418e+07	1.17198e+07	1.17197e+07	1.17419e+07
M425T40	425.206	39.893	5-heptenoic acid, 7-[(1r,2r,3s,5s)-2-[(1e,3r)-3-(2,3-dihydro-1h-inden-2-yl)-3-hydroxy-1-propen-1-yl]-3-fluoro-5-hydroxycyclopentyl]-, (5z)-	[M+Na]+			Lipids and lipid-like molecules	Fatty Acyls	Fatty acids and conjugates	39051.2	44319.5	47721.4	56552.4	42200.8	25662.4	40332.5	28982.5	51973.9	46074.3	36504.2	29403.6	24019.7	52408.3	32176.5	46025.1	52524.4	41283.4	28274.6	6821.34	33586.4	49644.5	47388.7	29649.2	47102.6	37972.2	47071.7	45035.2
M439T395	439.246	395.112	5-heptenoic acid, 7-[(1r,2r,3s,5s)-2-[(1e,3r)-3-(2,3-dihydro-1h-inden-2-yl)-3-hydroxy-1-propen-1-yl]-3-fluoro-5-hydroxycyclopentyl]-, methyl ester, (5z)-	[M+Na]+						43140.1	31957.8	29923.6	30741.7	43707.1	19896.8	39534.3	17152.2	37304.2	38516.7	36111.8	37505.5	45139.3	16126.5	39834.3	23215.7	17732.3	40110.3	16026.8	17743.7	16687.1	13938.9	14148.7	40674.9	38742.9	38731.7	36055.3	26514.5
M373T533	373.242	533.152	5-heptenoic acid, 7-[(1r,4s,5s,6r)-6-[(1e,3s)-3-hydroxy-1-octen-1-yl]-2-oxabicyclo[2.2.1]hept-5-yl]-, (5z)-	[M+Na]+			Lipids and lipid-like molecules	Fatty Acyls	Eicosanoids	6404.83	7357.05	4813.44	6178.23	5656.89	6689.95	12974.5	8469.51	8034.28	14506.2	5619.02	6846.16	4450.28	11727.9	7641.9	7958.42	6101	18986.9	15192.3	8833.98	6652.97	9264	5518.73	14814.7	10995	10387.5	11843	11855.7
M143T329	143.117	328.967	5-hydroxyvalproic acid	[M+H-H2O]+	HMDB0013898	C16650	Lipids and lipid-like molecules	Fatty Acyls	Fatty acids and conjugates	48835.7	57012.2	60160.5	6852.63	11874.6	18892.9	27719.3	44746.2	67134.1	26374.9	34462.4	28665.6	18627.9	29047.4	16636.5	54247.9	46727.2	45875.7	56444.2	29166.6	20745.5	29149.2	33198.2	23171.1	30717.8	29074.1	29077.4	29065.5
M219T406	219.097	405.783	5-L-Glutamyl-L-alanine	[M+H]+	HMDB0006248	C03740	Organic acids and derivatives	Carboxylic acids and derivatives	"Amino acids, peptides, and analogues"	126463	64590.9	152845	268591	110461	74289.1	174990	339053	44197.3	118842	69059.9	259775	93873.7	147348	93829	76108.9	120273	284987	611088	268098	265021	567376	188689	312650	246784	250639	248028	246793
M192T170	192.087	169.594	5-methoxytryptophol	[M+H]+	HMDB0001896		Organoheterocyclic compounds	Indoles and derivatives	Indoles	14112.2	4437.01	7563.15	12418.2	10706	14087.1	12259.8	11334	12874.8	14312.4	10517.4	10753.5	8779.36	12851.3	10679.3	5539.28	14922.6	8980.5	7388.37	12834.9	10611.2	6727.6	13611.1	12036	10203	10282.7	10329.9	12031.9
M126T180	126.065	179.841	5-methyl-2'-deoxycytidine	[M+H-C5H8O3]+		C03592	Nucleosides, nucleotides, and analogues	Pyrimidine nucleosides	Pyrimidine 2'-deoxyribonucleosides	41058.1	41761.6	37364.3	45086.1	35350.3	48269.2	34541.1	38729.7	27423.1	60039.4	28249.3	27440.7	31539.6	80072.7	47209.3	36914.2	30900.8	77714.6	54183.3	76756.4	32517.7	88792.9	63721.2	52272	51631.7	53223.2	52653.2	53234.6
M129T390	129.065	390.032	5-methyl-5,6-dihydrouracil	[M+H]+	HMDB0000079	C00906	Organoheterocyclic compounds	Diazines	Pyrimidines and pyrimidine derivatives	11083.7	11292.8	11286.8	6735.89	6326.64	10070.6	6803.33	9846.86	11698.9	5723.13	9323.15	7319.39	8831.43	8999.35	6227.43	8166.02	10197.7	11962.7	8279.29	5932.4	9136.27	3311.7	10161.5	10956.7	7360.46	8106.92	7340.14	7645.35
M258T272_2	258.108	272.236	5-methylcytidine	[M+H]+	HMDB0000982		Nucleosides, nucleotides, and analogues	Pyrimidine nucleosides		25792.7	22846.4	25758.1	31048.7	23205.8	22234.6	28374.9	31770.4	21585.1	19523.9	8684.05	21196.1	18217.6	17749.2	26252.4	26850.8	30985.2	31474.6	22441.3	23264.9	28960.8	21714.6	24515.9	24359.8	19390.9	19242.4	22623	19568.7
M126T217	126.065	217.2	5-Methylcytosine	(M+H)+	HMDB0002894	C02376	Organoheterocyclic compounds	Diazines	Pyrimidines and pyrimidine derivatives	27997.6	21835.2	29155.3	41771.6	20577.9	18599.8	22252.3	18775	23390.5	17045.2	37010.9	29052	19713.5	35628.1	32134	24618.9	23197.2	18649.8	15944.7	11559.6	25348	24406.9	25947.7	19139.3	20274.8	20557.4	20273.8	21639.3
M460T427	460.192	426.823	5-methyltetrahydrofolic acid	[M+H]+	HMDB0001396	C00440	Organoheterocyclic compounds	Pteridines and derivatives	Pterins and derivatives	29515.7	24491	26375.6	17832.1	25439.9	24709.5	23334.7	25873.7	26067	50981.3	26116.4	25833.7	21131.2	15057.2	28335.4	22361.9	47254.3	39615.6	35453.6	26797.6	28337.4	26344	20687.6	28010.7	28137.5	25458.9	25336.9	25475.6
M284T322_2	284.094	322.418	5-nitro-2-(3-phenylpropylamino)benzoic acid	[M+H-HO]+		C13705	Benzenoids	Benzene and substituted derivatives	Benzoic acids and derivatives	31580.5	65167.2	47586.1	46240.9	92609.9	96309.8	75585.1	56204.2	68813.4	39121.8	79865.6	97108.9	84108.5	44335.8	52549.7	58203.9	46295.8	20589.6	49571.5	42389.2	81592.1	29678.1	46498.2	46048.3	28664.1	26177.1	27109.9	26346.5
M276T256	276.216	256.135	5-norbornene-2,3-dicarboximide, n-(2-ethylhexyl)-	[M+H]+		C18795	Organoheterocyclic compounds	Isoindoles and derivatives	Isoindolines	7367.06	23568	17464.9	12917	16513.8	28334.7	25122.5	14915.2	15478.5	10760.4	19889	26045.8	18104.9	13916.6	24896.2	18221.2	12167.5	19224.1	8947.66	13095.7	19589.7	5911.43	15252.7	8279.77	19615.9	21560.7	21548.7	21921.1
M297T392	297.179	392.341	5,8,11,14-eicosatetraynoic acid	[M+H]+			Lipids and lipid-like molecules	Fatty Acyls	Fatty acids and conjugates	81235.3	362856	279283	372770	524389	439809	359105	173877	433484	204588	296126	401537	364607	65825.1	373870	319262	271139	90891.5	193428	152360	213788	77689	210362	262176	224723	219232	219588	254516
M305T254	305.113	253.724	5,9-dihydroxy-5,7,7-trimethyl-4,5a,6,8,8a,9-hexahydro-1h-azuleno[5,6-c]furan-3-one	[M+K]+			Lipids and lipid-like molecules	Prenol lipids	Terpene lactones	18961.8	19937.8	16889.4	17720.1	18854.8	16134.3	21231.3	16292.6	19138.4	14583.4	17474.4	20621.7	4498.49	19425.1	15349.9	16932.8	23255.4	17690.2	18268.8	18896.8	19032.8	22191	16507.9	18464.6	19521.8	21942	19533	20484.4
M369T31	369.349	31.326	5.alpha.-cholest-7-en-3.beta.-ol	[M+H-H2O]+	HMDB0001170	C01189	Lipids and lipid-like molecules	Steroids and steroid derivatives	Cholestane steroids	15200	21186	16084.5	8801.6	15450.8	12024.1	17278.1	10726.9	24735.5	24898.3	14782.5	15209.5	11028.4	10067.6	34450.2	25592.9	8844.33	16748.5	97300.3	26329.7	11926	26301.7	21291.8	19005.6	18625.1	19960.1	19901	19959.1
M329T301	329.205	301.018	5.beta.-pregnane-3.alpha.,17,21-triol-11,20-dione	[M+H-2H2O]+		C05470	Lipids and lipid-like molecules	Steroids and steroid derivatives	Hydroxysteroids	64960.4	70459.2	69762.5	101676	88078.3	71070.4	73031.4	61371.9	79529.4	52846.2	82976.9	73440.4	82179.3	69997	82485	71794.2	91832.7	79655.2	88694.1	68439.2	77775.6	89839.9	74408.5	70611.3	86452.7	87376.1	87381.1	86467.1
M283T236	283.237	236.452	5.beta.-pregnane-3.alpha.,17.alpha.,20.alpha.-triol	[M+H-3H2O]+		C14680	Lipids and lipid-like molecules	Steroids and steroid derivatives	Pregnane steroids	27408.5	23332.7	32259.5	29691.8	28675.7	22425.6	35662	22374.9	19033.4	21083.4	32387.9	28732.7	22861.7	27308.8	24536.5	30856.9	36833.1	35118.1	34463.2	22099.9	21812.1	12676.7	28852.2	18661.3	37360.2	36605.2	36860.9	36103.1
M510T295	510.316	295.039	6-(3-dimethylaminopropionyl)forskolin	[M+H]+			Lipids and lipid-like molecules	Prenol lipids	Triterpenoids	30787.5	29600.4	16510.1	45320	35153.4	32235.3	29137.7	21543	31437.4	9694.02	35169.3	30326.2	24140.9	39838.6	24627.5	39593.4	63438.6	57060.6	41713.7	51993.1	27232	28956	34685.5	36476.5	73249.3	61513.3	75002	66136.6
M684T484	684.253	483.634	6-acetylacteoside	[M+NH4]+			Phenylpropanoids and polyketides	Cinnamic acids and derivatives	Hydroxycinnamic acids and derivatives	39813.9	43672.6	31513.8	27762	27158.2	52528.1	49060.7	51477.6	30358.9	41860.6	26654	41978.5	33179.6	24447.5	39960.3	22495	28857.1	34754.4	45196.8	39558.5	34608.6	28823.4	43979.3	45752	51217.1	57246	51211.6	51193.9
M248T258	248.138	258.469	6-benzyloxycarbonylaminohexanoic acid	[M+H-H2O]+			Benzenoids	Benzene and substituted derivatives	Benzyloxycarbonyls	25618.1	26711	32901.1	27635.4	27688.5	55086.4	28159.6	18337.2	22058.4	47410.6	22881.9	53124.2	39867.8	43967.2	39780.6	22305	44709.8	42586.1	22206.4	33469.5	57718.3	34841.3	24081.3	24581.3	51293.7	49347.9	50076.5	47091.8
M164T48	164.07	48.0885	6-hydroxy-3,4-dihydro-1h-quinoline-2-one	[M+H]+			Organoheterocyclic compounds	Quinolines and derivatives	Quinolones and derivatives	929742	27301.5	97852.1	27262.7	881258	72805	95112.1	135694	1.07795e+06	292824	650017	405551	57445.5	237270	342480	1.06868e+06	602001	152206	114548	212714	663467	81279.6	473479	89274.4	394980	541518	396346	392292
M232T198	232.078	198.49	6-hydroxymelatonin	[M+H-NH3]+	HMDB0004081	C05643	Organoheterocyclic compounds	Indoles and derivatives	Hydroxyindoles	60854.5	93836.1	57932.7	44341.7	48351.5	62554.9	86068	44375.9	95284.2	58947.2	65740.4	53997.6	41008.5	55411.9	60974.2	65187.8	57092.6	53706.8	45072.8	65275.9	33516.2	58150	66087.5	33274.6	70404.9	94131.2	94150.5	94132.5
M140T242_2	140.052	242.081	6-Hydroxynicotinic acid	[M+H]+	HMDB0002658	C01020	Organoheterocyclic compounds	Pyridines and derivatives	Pyridinecarboxylic acids and derivatives	107147	101744	100981	121686	86464.9	133350	105720	96883.5	94157.7	100440	115372	98308.3	89724	156132	122409	93134.6	156669	105592	121964	155607	102321	142520	140379	100734	141590	142307	142311	140564
M303T413	303.154	412.883	6-ketoestriol	[M+H]+	HMDB0000530		Lipids and lipid-like molecules	Steroids and steroid derivatives	Estrane steroids	59854.4	90700.9	56627.6	97315.7	87112	114757	167923	94209.2	243742	64264.2	87451.6	99220.1	98934.3	85878.2	141863	128539	116853	90682.8	90585.6	71098.2	141097	84203.9	137747	88268.8	102836	107287	107366	99944.3
M351T226	351.207	225.932	6-ketoprostaglandin e1	[M+H-H2O]+	HMDB0004241	C05962	Lipids and lipid-like molecules	Fatty Acyls	Eicosanoids	11113.9	29613.1	62045	53070.3	65137.3	59881.6	69861.7	57873.3	65328.1	59475.8	41508.9	39034	57800.3	69352.5	75231.2	71201.9	73023.2	77928.2	75633.2	20382.8	58863	59259.8	66694.4	53146.9	81494.7	81445.7	81497.4	72170.4
M431T382	431.221	381.604	6.beta.-hydroxyeplerenone	[M+H]+			Lipids and lipid-like molecules	Steroids and steroid derivatives	Steroid lactones	40268.9	20783.6	34368.6	33804.8	32964.5	33273.7	40153.1	36354.2	34542.1	29917.1	37107.1	35603	39564.4	47908	37520.8	36377.2	45265.4	48448.4	45724.6	43402.6	38966.8	27490	25593.3	25687.2	46806.1	47155.8	46087.3	46438.6
M287T376	287.197	375.986	6.beta.-hydroxytestosterone	[M+H-H2O]+	HMDB0006259	C14497	Lipids and lipid-like molecules	Steroids and steroid derivatives	Androstane steroids	45335.9	13869.3	9941.53	13223.2	11898.2	13681.1	8113.41	5868.08	13119.8	8330.05	20402	17585.2	43414.5	8562.2	11936.4	30577.6	8883.5	51165.1	6751.62	6909	33008.1	35222.5	7212.49	5684.16	10824	10826.2	9337.18	10549.6
M417T202	417.307	201.988	6.beta.-testosterone enanthate	[M+H]+			Lipids and lipid-like molecules	Steroids and steroid derivatives	Steroid esters	14281	20427.4	23384.7	16052.8	17650	17622.1	15688.5	11900	9498.32	9199.25	15602.8	15106.4	11308.8	14766.4	18276.5	20890.4	15731.5	33175.9	25456.2	10778.3	9308.48	11848.2	14445.8	27251	28569.7	25407.4	27961	29101
M342T257_2	342.204	256.903	7-acetyllycopsamine	[M+H]+		C16751				158573	67637	65279.5	102019	78509.5	155038	91851.8	127576	71007.3	65572.4	71833.1	150639	149114	87899	177054	76048	107262	118608	99968.2	80830	141298	126137	77870.6	59964.4	134481	135704	135855	134487
M135T244_2	135.091	243.595	7-aminoflunitrazepam	[M+H-C8H4FON]+	HMDB0041818		Organoheterocyclic compounds	Benzodiazepines	1,4-benzodiazepines	209033	222999	249813	179355	147838	168329	188362	204110	168267	233000	216037	191923	166612	199930	191634	197634	166080	187990	185017	159370	205490	190707	173813	143108	194733	200485	197487	193643
M238T130_1	238.158	129.935	7-aminonimetazepam	[M+H-CO]+			Organoheterocyclic compounds	Benzodiazepines	1,4-benzodiazepines	231436	242313	120986	135992	29435	145598	108642	90519.8	177322	90261.5	139764	106689	119123	165392	185212	44266.2	41137.3	116936	150141	28545.2	142885	204490	144516	68056.1	124056	144368	124437	124367
M204T52_2	204.101	52.009	7-dimethylamino-4-methylcoumarin	[M+H]+						155789	89199	24028.5	108397	46360	135982	114015	111435	102530	80957.6	103739	47295.1	79602.2	144475	47268	72421.8	97415.9	106510	179669	55144.2	40575.4	146334	57491.8	39989.1	114965	114949	96882.4	114898
M619T403	619.256	402.796	7-ethyl-10-(4-n-aminopentanoic acid)-1-piperidino)carbonyloxycamptothecin	[M+H]+	HMDB0060661					45972.2	29986.9	34526.4	44534.3	32798.1	51529.3	64605.4	21109.1	12706.6	34424.2	13338.4	34463.3	38554.8	43069.2	26665.9	52841.6	56622.2	41682.3	39536.7	35728.2	40440.3	76008.5	94069.1	40034.6	47732.7	39635.7	40061.7	39408.4
M379T349	379.186	349.312	7-methoxy-2-methylquinolin-4-ol	[2M+H]+			Organoheterocyclic compounds	Quinolines and derivatives	Quinolones and derivatives	139753	177611	131086	172649	104892	112967	165286	119595	114579	113777	170753	131855	115917	178755	159599	133309	128572	167133	155813	94134.3	129223	107195	129426	95577.1	203415	212945	206724	203409
M271T55	271.059	54.833	7,3',4'-trihydroxyisoflavone	[M+H]+	HMDB0041655	C14313	Phenylpropanoids and polyketides	Isoflavonoids	Isoflav-2-enes	21310.7	12684.4	20757	24008.9	19070.9	105216	27065.4	33234.8	13707.4	23996	4434.54	58224.1	41013.2	116780	45839.1	24472.8	16937.5	99986	174164	62155.6	44492.5	112179	58919.8	123012	44451.3	42664.9	39210.8	45336.9
M299T178	299.102	178.303	7,4'-dimethoxy-3-hydroxyflavone	[M+H]+			Phenylpropanoids and polyketides	Flavonoids	Flavones	42925.5	45369.6	47055.7	72009.8	41891.3	34205.8	52231.8	28240.7	37151.4	37358.3	33165.5	47253.4	31585.4	51551.8	40948.5	39403.5	32589.9	61004.2	44914.8	40343	24703.8	38736.5	50450.4	26756.1	60553.3	60564.7	60547.5	55873.3
M297T246	297.215	245.981	7,8-dehydropregnenolone	[M+H-H2O]+			Lipids and lipid-like molecules	Steroids and steroid derivatives	Oxosteroids	45070.7	59337.7	54313.8	60130.2	54210.6	79217	56701.5	52788.5	54021.1	98622.3	57461.1	59499.5	54413.5	38305.2	57557.5	53396.6	57441.5	45803.5	61216.7	54662	57621.4	36951.9	52235.4	39952.1	63936.6	68308.2	65813.1	65707.3
M389T426	389.226	426.091	7.alpha.-(thiomethyl)spironolactone	[M+H]+			Lipids and lipid-like molecules	Steroids and steroid derivatives	Steroid lactones	19467.2	52378.4	55368	53701.9	54118.9	14629.9	50436.8	11834.2	49345.1	39298.5	53396.1	46315.9	48973.1	64294.1	52785.2	9151.7	40793	78033.4	56383.9	55620.8	44429.5	61766.4	24647.3	46411	44731.4	42996.4	41724.3	46343.8
M315T40_1	315.121	39.835	8-(2-hydroxy-3-methoxy-3-methylbutyl)-7-methoxychromen-2-one	[M+Na]+						300098	306396	208619	357602	280302	223520	200407	206944	308832	264199	349246	135780	319669	300588	258253	161220	169825	239868	177882	135847	173511	248421	241826	98739.5	219988	218413	230487	225007
M176T54	176.07	53.533	8-methoxyquinolin-4-ol	[M+H]+			Organoheterocyclic compounds	Quinolines and derivatives	Quinolones and derivatives	25891.3	51680.5	31694.4	22815.3	29836.2	14289.5	26304.9	23246.3	46227.3	35480.1	47154.4	20294.3	22455.5	32104.4	9074.4	27543.4	21723.1	26087.9	28227.1	12569.8	25515.2	23989.8	27735.3	15496.3	25612.6	23763.9	25360.4	24691.7
M223T298	223.107	297.937	9-Decen-1-ol	(M-2H+3Na)+						26290.1	72780.2	96025.5	60437.7	52861.8	109637	66426	101507	58152.7	112662	26350.8	26517.5	167873	30627.6	90809.8	29735.1	100280	32425.2	58575.1	98625.9	66574.8	145149	107372	100355	69076.8	37855.1	38767.8	37786.2
M229T335	229.117	334.57	9-methoxycarbonyldec-9-enoic acid	[M+H]+			Lipids and lipid-like molecules	Fatty Acyls	Fatty acids and conjugates	154069	184949	202724	144995	193358	181509	152538	137021	177186	109421	156058	192136	145181	190920	181765	197857	177424	154330	137629	195895	176105	121779	219694	173813	191724	179485	174749	174739
M335T208	335.269	208.112	9,11-methane-epoxyprostaglandin f1.alpha.	[M+H-H2O]+			Lipids and lipid-like molecules	Fatty Acyls	Eicosanoids	20694.5	42065.3	26259.1	36720.3	17160.1	15171	47423.5	17537.5	16541.6	24833.8	40510.5	20060.4	18942.8	35136.7	34438.2	14365.1	18173	37222	17231.6	27963	25577.1	14791.2	24283.4	25815.6	25988.6	26014.2	29140.7	26658.4
M935T498	935.284	498.21	9,12-epoxy-1h-diindolo[1,2,3-fg:3',2',1'-kl]pyrrolo[3,4-i][1,6]benzodiazocine-10-carboxylic acid, 2,3,9,10,11,12-hexahydro-10-hydroxy-9-methyl-1-oxo-, methyl ester, (9s,10r,12r)-	[2M+H]+			Organoheterocyclic compounds	Indoles and derivatives	Carbazoles	1772.64	4975.68	56286.2	4184.51	1829.5	2734.28	1995.86	2765.69	1965.2	3056.13	3022.31	3173.77	2324.26	3227.72	2591.05	2420.34	2513.37	3737.91	3776.46	3697.91	2440.92	3571.27	3532.03	3347.91	3551.72	3342.82	4231.62	3338.08
M355T140	355.244	139.766	9s,11,15s-trihydroxythrombox-13e-enoic acid	[M+H-H2O]+			Lipids and lipid-like molecules	Fatty Acyls	Eicosanoids	191048	113353	104958	113286	134979	142863	151558	229573	97512.8	159544	92568.9	99808.2	192903	101915	137544	112048	108171	100295	105920	238446	198617	80245.4	140495	137873	103118	106263	107539	107540
M293T32	293.247	31.874	9z,11e,13e-octadecatrienoic acid methyl ester	[M+H]+			Lipids and lipid-like molecules	Fatty Acyls	Lineolic acids and derivatives	206960	65970.4	156672	911291	143414	165811	189383	284728	112955	75222.3	258322	214822	293564	382483	293281	137108	353437	297755	556427	336473	213444	581082	386510	499445	307249	334930	320818	328103
M392T361	392.24	360.899	Abiraterone acetate	[M+H]+			Lipids and lipid-like molecules	Steroids and steroid derivatives	Steroid esters	54244	33447.3	42240.4	64112.7	50771.3	42806.5	33250.3	53766.8	37482.1	38540	53163.2	41341.2	42728.8	51026.9	47845.5	40086.6	52137.7	38501.3	54735.8	41384.9	47215.8	58760.1	57703.7	35959.5	47312.5	50516.7	49537.1	50564.4
M337T385	337.21	384.736	Acebutolol	[M+H]+	HMDB0015324	C06803	Organic oxygen compounds	Organooxygen compounds	Carbonyl compounds	20225.1	26074.3	19810.8	34317.5	20166.7	30176.3	15922.5	23670.4	33448.9	27544	31373.2	17318.1	25671.9	21136.3	15836.6	17344.4	27829.6	28848.7	21033.7	29759.9	30855.1	14690.9	21635.6	35786.1	26368	22513.5	23103.1	22758.3
M152T212	152.07	212.153	Acetaminophen	[M+H]+	HMDB0001859	C06804	Benzenoids	Phenols	1-hydroxy-2-unsubstituted benzenoids	104185	117638	100438	79729.2	81686.6	107044	154003	132940	95019.2	142589	99890.5	96074.4	81111.9	124333	90953.2	105436	72655	120752	105224	111897	112311	122995	104790	76158.6	131539	131540	131088	129241
M413T446	413.243	446.459	Acetic acid, 2-[[(2z)-4-[(1r,2r,3r,5r)-5-chloro-2-[(3r)-3-cyclohexyl-3-hydroxypropyl]-3-hydroxycyclopentyl]-2-buten-1-yl]oxy]-, 1-methylethyl ester	[M+H-H2O]+			Organic oxygen compounds	Organooxygen compounds	Alcohols and polyols	19340.4	20643.9	22891	21885.5	15568.8	23034.5	21801.4	9316.27	12088.3	12356.6	15715.1	6913.18	14088.8	25912.4	11322.3	20774.8	10227.5	23872.7	26840.6	28820.9	21846.9	11391.1	8612.64	22755	29930.9	26681.9	20730.7	25443.6
M347T289	347.093	288.559	Acetohexamide	[M+Na]+	HMDB0014558	C06806	Organic oxygen compounds	Organooxygen compounds	Carbonyl compounds	14222.1	30220.4	22782.8	11195.1	28709.1	27413.9	20106.8	17873.1	23467.4	25938.7	21880.3	26657.8	17044.3	14756.1	23098.2	16698.4	17318.6	15358.4	9869.46	15582	23633.3	28406.7	17761.5	24148.5	7413.93	7318.74	7682.56	11494.3
M688T361	688.339	360.935	Acetylaconitine	[M+H]+			Lipids and lipid-like molecules	Prenol lipids	Diterpenoids	16909.9	21313.8	22816.7	27566.6	26192.6	20214.5	19626.7	25191	22227.4	21874.7	21840	20654.2	24346.4	16551	22621.9	23036.3	21568.5	27591.7	23056	12037.8	12356.1	25981.3	23580.1	11653.9	20314.4	20318.1	20349.6	17629.8
M146T372	146.117	371.656	Acetylcholine	[M]+	HMDB0000895	C01996	Organic nitrogen compounds	Organonitrogen compounds	Quaternary ammonium salts	8.78499e+06	9.54523e+06	5.20308e+06	4.04497e+06	2.23447e+06	4.52148e+06	3.15323e+06	4.39417e+06	1.15226e+07	5.61674e+06	6.64197e+06	8.21296e+06	6.23212e+06	7.51898e+06	7.57154e+06	6.63675e+06	6.85764e+06	7.23814e+06	6.63879e+06	7.62353e+06	6.36843e+06	6.48139e+06	9.3933e+06	5.09889e+06	6.64878e+06	6.73549e+06	6.64843e+06	6.69235e+06
M218T307	218.113	307.498	Acetylcitrulline	[M+H]+			Organic acids and derivatives	Carboxylic acids and derivatives	Amino acids, peptides, and analogues	24179.9	33863.8	28706.5	18440.1	25962.1	26895.6	17687.9	14444.5	20289.2	12053.8	10795.1	15344.8	15412.7	13416.1	4496.75	10552	16416.6	6059.99	14140.8	12647.4	17701.4	13595.1	16902.5	13487.8	29485.9	33757.4	33825.7	32558.6
M219T365_2	219.17	364.8	Acetylnorfentanyl	[M+H]+			Benzenoids	Benzene and substituted derivatives	Anilides	8732.49	6375.11	7135	4959.25	11152.1	6583.96	4697.7	6646.68	6607.55	6862.63	9739.37	9553.84	8625.35	9052.64	6433.1	7552.49	7608.44	5151.92	5288.78	7464.74	5686.47	3211.38	4518.37	3953.65	7297.15	5654.06	5581.64	5790.59
M500T354	500.273	353.594	Aconine	[M+H]+		C19990	Lipids and lipid-like molecules	Prenol lipids	Diterpenoids	799193	55628.2	348211	799821	378253	279677	96202.4	354916	529423	658890	407765	104848	610090	628601	485671	319812	522393	1.07946e+06	383404	396269	334777	640463	409666	398342	529427	503974	523531	536750
M646T339	646.336	339.196	Aconitine	[M+H]+		C06091	Lipids and lipid-like molecules	Prenol lipids	Diterpenoids	16415.1	13389	15129.9	12836	12868.4	15683.3	15935.5	7876.47	13613.4	15136.4	14460.2	15337.5	6505.89	18066	14563.4	7021.66	14541.2	12070.8	21293.4	17450.4	18370.2	15147.6	17165.1	14788	21992.2	18010.8	19256.5	18033.8
M533T386	533.293	385.662	Acovenoside a	[M+H-H2O]+			Lipids and lipid-like molecules	Steroids and steroid derivatives	Steroid lactones	20467.4	15453.3	15017.1	18238.3	20416.7	15893.3	17015.1	17463.3	14914.8	18450	16803.8	17987.5	15427.3	23077.1	18695.2	18976.1	20581.4	55935.1	9018.38	16556.3	9468.38	21058.1	13188.4	17944.8	19375.2	20817.1	23633.9	21523.3
M266T323	266.174	323.231	Acridine orange	[M+H]+		C19315	Organoheterocyclic compounds	Quinolines and derivatives	Benzoquinolines	187460	193818	164515	204989	188932	187736	180284	193366	154052	155088	196222	204104	181087	197091	206554	153336	167022	158195	158266	136716	183668	139856	188121	233782	156624	150782	152737	155190
M226T215	226.07	215.225	Acyclovir	[M+H]+	HMDB0014925	C06810	Organoheterocyclic compounds	Imidazopyrimidines	Purines and purine derivatives	39297.8	38411.7	37618.7	34598.7	23396.3	35406.4	38817.3	36072.5	33577.4	35823.8	20015.3	34619.3	30894.8	18654.8	39635.3	32894.4	29004	38582.6	46854.2	39166.1	23076.1	15166.2	28970.1	23955.2	38321.9	41283.9	40059	41294.8
M136T148_2	136.061	148.099	Adenine	[M+H]+	HMDB0000034	C00147	Organoheterocyclic compounds	Imidazopyrimidines	Purines and purine derivatives	1.14433e+06	1.39431e+06	758647	857633	922154	1.46936e+06	659782	853039	883754	723328	675453	576476	550489	809558	679011	612992	594358	836934	1.17878e+06	1.67143e+06	459085	1.00335e+06	960365	1.27518e+06	952160	952239	952269	998528
M268T157	268.103	156.582	Adenosine	[M+H]+	HMDB0000050	C00212	Nucleosides, nucleotides, and analogues	Purine nucleosides		446759	306879	276278	230766	254319	385417	331500	311396	505334	389205	342454	285189	305072	287099	370629	321820	345607	320801	324275	449026	194705	360770	282338	408061	430890	422827	427036	444898
M334T423	334.124	422.737	Adrenaline bitartrate	[M+H]+			Benzenoids	Phenols	Benzenediols	32642.5	34079.4	31184.8	56426.5	32628	53908.9	48209.5	44675.4	23120.2	36728.6	44163.8	37578	26688.7	42258.4	29665.4	29044.1	41268.8	52269	57399	39986.6	30520.8	59847.5	57917.9	47985.2	53610.3	53725.3	53042.1	52512.2
M535T386_2	535.23	385.688	Aerucyclamide a	[M+H]+			Organic acids and derivatives	Carboxylic acids and derivatives	Amino acids, peptides, and analogues	435294	34436.7	178465	350470	106173	83428.5	92848.1	308616	145027	23269.4	121708	54700.9	320197	550425	32918.7	84136.8	451469	580985	360005	205064	87534.4	322064	360455	265020	257696	257693	256395	252818
M244T414	244.138	413.588	Agomelatine	(M+H)+	HMDB0015636		Organic acids and derivatives	Carboxylic acids and derivatives	Carboxylic acid derivatives	64292.8	75082.9	98886.3	96375.9	57416.6	58051.9	73966.3	92203.3	55230.3	80801.3	40629.3	69055.4	75810.7	95446.2	84868.6	80948.6	77140.2	77671.1	18425.1	68661.6	55786.7	83639.3	84891.5	68330.5	67539.8	63933.5	64190.3	71901
M327T287	327.189	286.896	Ajmaline	[M+H]+		C06542				17229.9	35058.6	42050.5	50641.8	36623.6	36836.8	33025.3	44454.5	34254.3	42580.1	19027	39785.9	15077.8	70995.2	43587.9	14383.4	38361	93025.1	69263.2	52199.2	21450.5	57186.3	60004.9	36297.5	46447.3	47199	51245.1	51172.2
M371T400	371.125	400.278	Ajugol	[M+Na]+			Lipids and lipid-like molecules	Prenol lipids	Terpene glycosides	4725.42	20049.6	14569.1	14233.2	24207.7	24455.1	18894.7	7987.95	25283.2	7898.82	23826.6	24735.6	14985.3	6556.96	12691.7	9509.86	8704.69	7948.48	9580.25	9308.56	10700.1	16466	9355.54	12444.8	8079.88	14731.3	14668.9	14753.9
M144T192	144.08	191.635	Ala-Ala	[M+H-NH3]+	HMDB0000303	C00398	Organoheterocyclic compounds	Indoles and derivatives	Tryptamines and derivatives	98217.9	147127	95041.6	101644	119276	184902	98189.3	138956	158293	121811	136007	94646.7	96408	91237.9	122679	113373	100037	74403	104794	123143	116458	103608	88175.9	93460.6	99524.9	96704	96191.7	91958.6
M317T414	317.189	414.004	Ala-Ala-Arg	[M+H]+			Organic acids and derivatives	Carboxylic acids and derivatives	Amino acids, peptides, and analogues	35859.5	12459.9	16406.5	23479.1	24882.9	18271.5	22488.2	19992.3	25573.6	19781.2	26409.4	24318	26205.1	30732.1	21398	14917.1	22302	44210.5	12759.5	26261	19133	18851.9	27083.3	38031.9	25730.7	23546.9	23551.7	23548.9
M289T430	289.185	430.276	Ala-Ala-Lys	[M+H]+			Organic acids and derivatives	Carboxylic acids and derivatives	Amino acids, peptides, and analogues	24035.6	19485.3	17684.9	52474.7	21604.4	18956.9	28373.2	38470	24429.6	16246	16605.4	25563.8	19737.3	37351.7	26721.8	13077.8	35918.3	81859.7	36642	49004.3	23842	68164.6	53196.2	93244	37980.2	39655.6	37540.1	37535.1
M247T452	247.139	452.259	Ala-Arg	[M+H+i]+			Organic acids and derivatives	Carboxylic acids and derivatives	Amino acids, peptides, and analogues	19534.9	39330.8	36508.9	56402	20820	42329.9	34503.4	40982.7	27631.5	41307	30078.3	49785.5	42423.3	42981.9	30625.8	33348.9	27046.9	63047.6	63645.8	48686.3	34352.6	37224.6	57061.8	59443.8	65750.7	68174.5	58982	64311.7
M218T344	218.112	344.161	Ala-Gln	[M+H]+			Organic acids and derivatives	Carboxylic acids and derivatives	Amino acids, peptides, and analogues	30981.5	28644.1	38004.4	38871.3	40479.1	33498.6	34750.2	27176	53526	22593.7	29743.9	32597.4	38284.7	21474.2	32243.8	36972.8	30511.8	22186.5	22153.8	7631.14	26023.6	28166	13459	20994.5	39943.9	37281.2	38749.8	39394.4
M359T225_2	359.227	224.515	Ala-Ile-Arg	[M+H]+			Organic acids and derivatives	Carboxylic acids and derivatives	Amino acids, peptides, and analogues	17072.1	54630.5	61849.2	80057.5	56627.8	65158.6	65721.1	72999.3	54560.4	59714	57007.9	36313.9	56226.7	74727.3	69230.7	58090	38436.2	131604	90582.7	77090.4	48808.7	57098.9	81549.6	94729.3	73394.2	73395.3	73134.5	72001.3
M331T362	331.232	361.923	Ala-Leu-Lys	[M+H]+			Organic acids and derivatives	Carboxylic acids and derivatives	Amino acids, peptides, and analogues	68297.4	59714.9	45138	96867.5	53996.7	72478.7	86011.3	177010	31375.9	104720	38708.1	76790.3	36688.4	125882	54504.3	40014.4	93338.5	249292	82200.8	188276	76996.2	141423	150278	219351	98905.3	99004.2	112974	99743.6
M218T431	218.149	430.923	Ala-Lys	[M+H]+			Organic acids and derivatives	Carboxylic acids and derivatives	Amino acids, peptides, and analogues	61624.8	70661.1	58820.1	102574	67549.9	63490.8	81892	138672	41312.2	90543.3	47015.5	89684.5	36739.1	95843.9	64679.7	47903.3	85682.3	265509	146084	123758	79382.8	178829	109415	230537	117794	123246	118939	120046
M374T406	374.237	405.801	Ala-Lys-Arg	[M+H]+			Organic acids and derivatives	Carboxylic acids and derivatives	Amino acids, peptides, and analogues	27581	38279.9	33490.3	23342.7	59033.3	29177.1	28659.9	63066.8	57524.8	43099	10924.5	49522.7	8863.18	39542.2	37480.5	13915.6	37124.8	103816	33981.7	81529.1	43146.3	54952	54852.1	90595.2	43899	45943.1	42396.7	41769.8
M237T242	237.159	242.321	Ala-Phe	[M+H]+	HMDB0014859	C07375	Benzenoids	Benzene and substituted derivatives	Benzoic acids and derivatives	269191	115023	127577	200625	107397	160068	150485	670863	121686	257470	177998	269785	130102	372008	188710	179312	144928	163501	164046	205318	224389	123390	269332	313182	261228	243189	242188	261565
M187T330	187.107	330.466	Ala-Pro	[M+H]+	HMDB0028695		Organic acids and derivatives	Carboxylic acids and derivatives	Amino acids, peptides, and analogues	66114.1	68169.8	62469.2	92137.5	63766.2	81389.3	79663.9	95231	61081.5	89916.3	68002	108691	71789.7	114422	94539.6	60674.2	84427.3	166058	118999	112358	120290	184861	114930	134415	118559	106011	118375	115288
M305T409	305.169	408.744	Ala-Ser-Lys	[M+H]+			Organic acids and derivatives	Carboxylic acids and derivatives	Amino acids, peptides, and analogues	203046	44905.2	98354.4	59077.5	52745.1	42779.2	61560.2	75866.8	80628.9	56329.8	53526.6	50528.8	43453.4	78950	52706.9	126603	66334.2	127723	66158.2	68115.3	38871.7	76952.6	66253.2	58034.6	111820	143191	97206.7	98283.9
M319T356	319.222	356.356	Ala-Thr-Lys	[M+H]+			Organic acids and derivatives	Carboxylic acids and derivatives	Amino acids, peptides, and analogues	17782.2	13742.2	16111.5	17575.2	11200.1	14056.8	16704.5	15277.2	11884.7	14343.2	13537.6	14011.7	15907.4	26707.7	24981.5	18526.5	23409.5	21321.1	27259	20985.8	19414.8	19464.8	21487.5	15310.9	22479.4	22875.7	23664	22475.1
M432T145	432.245	145.194	Ala-Trp-Arg	[M+H]+			Organic acids and derivatives	Carboxylic acids and derivatives	Amino acids, peptides, and analogues	54870.3	48853.8	86220.7	57307.4	18506.4	47262.4	49129.5	45963.8	45107.2	53994.8	48794.2	40505.1	31725	26077.4	47948	53102.3	54303.6	65829.7	20531.9	59809.1	51259	23861.3	38247.9	56045.2	47856.1	50775.6	50870.9	34408.9
M404T274	404.216	273.756	Ala-Trp-Lys	[M+H]+			Organic acids and derivatives	Carboxylic acids and derivatives	Amino acids, peptides, and analogues	109905	188127	71185.8	103991	95722.4	199839	113208	97927.5	69851.7	84470.5	77727	106903	185412	146291	188642	113785	126862	128479	114963	120621	123634	51449	104230	98444.1	192087	184516	195188	195223
M189T276	189.123	275.659	Ala-Val	[M+H]+	HMDB0028700		Organic acids and derivatives	Carboxylic acids and derivatives	Amino acids, peptides, and analogues	56051.6	71431.4	52606.5	48572.6	65460.2	62528.1	102449	120962	10636.4	85739.5	47162.5	94269.1	32302.2	99987.7	63045.1	49038.4	70146.1	180711	122295	145499	67312.8	105248	148268	150910	149791	145257	149738	149813
M345T371	345.222	371.199	Ala-Val-Arg	[M+H]+			Organic acids and derivatives	Carboxylic acids and derivatives	Amino acids, peptides, and analogues	32468.7	41075	34570.5	62202.4	78531.4	58689.7	37622.8	87033.8	21364.1	109641	28375.3	39725.2	12686.5	47053.2	36870.4	56994.6	60108.3	119154	47383.2	98806.8	75097	80996.5	143537	230848	48852.9	48867.3	46647.8	47923.6
M317T388_2	317.217	388.342	Ala-Val-Lys	[M+H]+			Organic acids and derivatives	Carboxylic acids and derivatives	Amino acids, peptides, and analogues	121908	80114.7	83040.2	111688	83927.3	80749.8	101635	241754	22439.1	146897	66062.5	143496	50430.6	123822	102181	50888.5	138566	266694	120116	230203	114073	180459	161386	324753	136257	137285	137250	131848
M90T337	90.0544	336.869	Alanine	[M+H]+	HMDB0000161	C00041	Organic acids and derivatives	Carboxylic acids and derivatives	Amino acids, peptides, and analogues	108890	245244	157490	76501.3	99375.9	190525	163618	114817	186574	227772	174427	205332	111509	176022	194688	173819	139658	211605	113010	223651	151595	119718	156742	132198	197764	189623	200195	200180
M132T198	132.101	198.293	Alanine betaine	[M+H]+			Organic acids and derivatives	Carboxylic acids and derivatives	Amino acids, peptides, and analogues	89094	87643.3	89420	72157.5	110910	100504	152306	94872.6	85888.6	51297	81992.1	74439.8	61167.2	139490	88617.2	76314.2	77527.2	90807.9	65179.9	135446	71319.4	90180.2	80711.8	83916.5	112041	151530	112162	112251
M319T141	319.135	140.778	Albiflorin	[M+H-C6H10O5]+		C17457	Lipids and lipid-like molecules	Prenol lipids	Terpene glycosides	196030	210745	223289	230877	246045	221693	154187	163043	192941	193115	180277	401865	204545	187940	464872	169648	350398	140542	208414	376950	191630	231661	262013	173505	178017	177744	177977	198425
M243T292_1	243.133	291.82	All-trans-4-hydroxyretinoic acid	[M+H-C4H10O]+	HMDB0006254	C16677	Lipids and lipid-like molecules	Prenol lipids	Retinoids	83093.7	122007	82636.5	114502	78831.8	118706	90506.2	76701.6	71534.7	105648	83718.1	84336.3	80716.1	88303.9	91093	166138	204984	116608	98495.1	72035.9	84154.3	84116.1	80602.2	79910.8	89082.6	93646.3	93651.8	93091.2
M137T18	137.045	17.801	Allopurinol	(M+H)+	HMDB0014581		Organoheterocyclic compounds	Pyrazolopyrimidines	"Pyrazolo[3,4-d]pyrimidines"	23095.8	43758.9	38373.8	42807.9	38211.9	48927.1	41347.5	52609.3	40565.2	38625	43350.1	7035.61	45123.6	44557.9	6031.77	44582.9	39126.9	39312.8	37113.9	6560.9	1858.6	45166.1	43356.8	36314.8	37395.2	16096.4	37673.8	37309.4
M607T348	607.265	348.204	Aloeemodin	[M+H]+		C09391				12496.3	8825.62	8432.94	15633.8	9284.24	10590	10217.8	15613	8702.09	15253.3	9268.4	10827.5	8573.67	10476.2	12444.2	13231.2	18853.2	23507.5	17918.2	13684.5	13070	18118.5	17742.6	13404	14971.5	13896	13897.6	13892.9
M296T36	296.257	35.953	alpha-Linolenic acid	(M+NH4)+	HMDB0001388	C06427	Lipids and lipid-like molecules	Fatty Acyls	Lineolic acids and derivatives	529192	213882	207819	356315	247035	247390	388687	403511	400579	297846	429057	299134	425565	433040	278130	381223	192786	338458	198492	177518	203555	493924	259159	222422	355302	356789	353181	352063
M490T34_2	490.421	33.616	Alpha-tochopheryl acetate	[M+NH4]+	HMDB0034227		Lipids and lipid-like molecules	Prenol lipids	Quinone and hydroquinone lipids	79657.2	63021.8	174674	121854	74119.9	138163	85982.7	65970	68836.5	54530.6	153218	71672.3	91480.4	95133.9	49962.3	45474.7	42874.8	24804.4	138083	76416.4	98270.7	97219.8	21195.3	85025.3	58894.2	64162.6	59920.9	81078.3
M568T299	568.273	298.94	Amikacin	[M+H-H2O]+	HMDB0014622	C06820	Organic oxygen compounds	Organooxygen compounds	Carbohydrates and carbohydrate conjugates	47769.5	21544.9	54359.6	42610.5	59495.7	54614.4	18010.8	29808.7	24225	29275.9	26866.1	41051.3	36363.6	30575.6	22344.6	24252.5	54883.6	40237.1	28033.7	21755.4	33133	40812.2	54388	43877	49012.8	54818.9	49457.7	48961.5
M254T257	254.116	256.807	Aminophenazone	[M+Na]+	HMDB0015493	C07539	Organoheterocyclic compounds	Azoles	Pyrazoles	18399.8	20962.4	39611.8	53403.7	34648	27756.9	45854.3	38015.4	36674.7	34386.2	46761.3	42591.8	13630.9	29921.9	42677.2	35527.6	40697.5	49538.9	51223.8	40251	38267.1	40221.7	33298.3	33449.6	52733.2	52734.7	49519.8	51733.5
M386T418	386.155	418.401	Amisulpride n-oxide	[M+H]+			Benzenoids	Benzene and substituted derivatives	Benzoic acids and derivatives	28370	25923.3	12157	21486.8	27234.9	12362.8	857070	30521.6	19593.1	20140.1	21402	24889.9	15250.5	38900.7	24883.2	34633.1	17151.9	33011.5	12427.5	32840.7	32369	31416.9	21868.3	13381.2	49007.5	48993.7	48010.1	48026.6
M278T329	278.174	328.967	Amitriptyline	[M+H]+	HMDB0014466	C06824				13812.8	30204.3	29036.6	26065.1	15702.8	32555.5	22036.2	43986.1	22836.3	21823.5	15595.5	19760.3	14706.6	10898.8	29411.8	23372.8	29562.7	23613	53657.1	27271.1	22976.5	12862.9	14879.2	15360.4	24458.1	23530.1	26292.5	23589.1
M147T41	147.079	41.298	Amylcinnamic aldehyde	[M+H-C4H8]+	HMDB0031313	C12288				132019	59577.3	32786.6	38388.8	126071	36486.1	37609.3	60813.3	123021	117384	115039	51376.6	40541.8	1050.51	55196.6	115857	111877	70797.7	70799.7	79171.9	109801	58485.3	94018.2	72203.5	88295.8	92064.6	86996.9	86950.2
M837T141	837.456	140.581	Anabaenopeptin b	[M+H]+			Organic acids and derivatives	Carboxylic acids and derivatives	Amino acids, peptides, and analogues	23592.9	27400.9	25829	43047.1	35713	18610.3	36571.2	30131.5	26389.6	14263.5	22919.4	35175	20553.5	17168.9	23441.4	41747.1	40916.7	22000.5	23711.5	35416.4	24258.8	21271.4	27353.2	23225.4	35040.8	29176.6	31365.6	28954.8
M484T328	484.299	328.401	Androstan-3-ol-17-one 3-glucuronide	[M+NH4]+	HMDB0004484	C11136	Lipids and lipid-like molecules	Steroids and steroid derivatives	Steroidal glycosides	300776	315637	238585	385169	253957	255568	221300	340241	364971	294087	184434	299800	204594	391321	246865	181527	288945	428804	427558	307584	204996	216661	289943	257976	328910	322567	324697	327213
M257T203	257.059	202.656	Anhydrobrazilic acid	[M+Na]+			Organoheterocyclic compounds	Benzopyrans	1-benzopyrans	5846.7	5716.03	3456.43	12241.7	34323.9	10028.5	3280.26	7575.5	5451.14	39479	43837.5	40284.9	10542	5616.79	6902.52	6523.9	49411.4	6458.92	49806.2	5844.66	7271.72	16834.4	50224.8	7869.4	5358.32	5460.25	4862.26	4996.08
M94T250	94.0644	249.857	Aniline	[M+H]+	HMDB0003012	C00292	Benzenoids	Benzene and substituted derivatives	Aniline and substituted anilines	43392.4	69904	39992.9	35343.2	40036.8	32325.5	50496.2	64786.4	27626.8	60281.1	61948.5	56713	30696.6	74084.7	44620.2	45126.1	22221.1	34564.1	26538.8	27440.8	103741	41981.6	59978.5	30041.2	55171.1	55165.9	55173.4	52574.9
M266T445	266.16	445.14	Anisomycin	[M+H]+		C11281	Benzenoids	Phenol ethers	Anisoles	8.44198e+06	1.42943e+06	8.19465e+06	1.774e+07	3.68958e+06	8.12794e+06	2.45373e+06	980963	1.03314e+07	2.08288e+07	2.28449e+06	2.69396e+07	1.20473e+06	7.20782e+06	8.09494e+06	2.90819e+06	7.20559e+06	7.77378e+06	2.94854e+07	1.08896e+07	3.29367e+06	2.79317e+07	4.34015e+06	3.20325e+07	1.29275e+07	1.3464e+07	1.29297e+07	1.29272e+07
M933T477	933.267	477.058	Anthocyanidin base + 5o, 1meo, o-hex, o-hex-coumaroylhex	[M]+	HMDB0038095		Phenylpropanoids and polyketides	Flavonoids	Flavonoid glycosides	4461	7379.92	7377.84	3748.86	5465.41	8353.33	6985.64	8489.9	4567.21	6156.26	3078.02	5418.75	7652.56	6909.72	8900.71	3509.58	3861.8	7695.51	4699.7	5109.24	7305.96	9623.87	7239.1	10869.7	8988.46	9246.26	9534.16	8989.59
M193T227	193.096	227.329	Apiole	[M+H-CH2O]+	HMDB0033776	C10429				756189	929339	781563	211659	497362	112865	364386	277887	10381.8	19413.9	534081	24035.6	208807	457106	22240.5	30665.8	19827.3	43873.9	48363.8	26558	11924.2	73424.4	81798.3	29234.6	213525	239770	208556	208436
M535T354	535.151	353.568	Aprepitant	[M+H]+	HMDB0014811	C21555	Organoheterocyclic compounds	Oxazinanes	Morpholines	10185.3	13306.7	8312.31	9229.62	16385.3	16135.5	16157.9	18672.9	16003.8	15629.6	3457.7	14718.6	16957.2	9665.31	3568.97	17286.4	12834.6	5747.37	38153.2	21327.6	14944.3	15335.2	4898.63	14285.4	9724.61	10154.7	10184.8	6894.4
M305T57	305.246	56.855	Arachidonic acid (peroxide free)	[M+H]+	HMDB0001043	C00219	Lipids and lipid-like molecules	Fatty Acyls	Fatty acids and conjugates	104100	84355.5	109430	108113	125527	117655	92885.1	102802	120688	86401.4	113041	52418.8	152703	102406	61593.7	92152	86521.4	103612	114023	70795.7	91571	103411	109940	120210	105805	105791	106633	109303
M348T189	348.287	189.208	Arachidonoyl ethanolamide	[M+H]+	HMDB0004080	C11695	Organic nitrogen compounds	Organonitrogen compounds	Amines	26549.3	16249.1	17510.5	64885.8	21143.7	19398.1	57218.3	23209.5	11982.6	9918.29	19191.7	15252.9	70354.2	41813.6	90253.9	16809.2	15892.3	63852.5	60846.3	73198.5	14861	42338.5	29956.3	51213.7	60704.1	60662.3	49615.7	60628
M360T196	360.288	195.906	Arachidonoylserinol	[M+H-H2O]+	HMDB0013650		Lipids and lipid-like molecules	Fatty Acyls	Fatty amides	40156.8	57273.7	20963	31770.7	31534.7	39851.8	55179.8	34483.7	28133.7	21011.3	31171.1	45581	23800.1	33522	33447.1	17779.5	38132.1	59938.1	43215.5	21582.1	20214.7	19534.6	22576.9	18716.8	39721.3	39770.4	54731	39724.9
M785T37_2	784.575	36.8595	Arachidonoylthiophosphorylcholine	[M+H]+			Organic nitrogen compounds	Organonitrogen compounds	Quaternary ammonium salts	317768	283724	290806	294509	275571	278793	181504	212245	241989	239416	266500	156384	292928	260056	174389	403202	252779	773193	214295	232446	249229	225147	471919	274232	314764	340203	340237	340174
M356T54	356.351	53.57	Arachidoyl ethanolamide	[M+H]+			Organic nitrogen compounds	Organonitrogen compounds	Amines	307798	298839	314665	277764	358429	297530	307337	270800	327866	272288	336593	229776	297118	279986	237658	270769	262221	231532	234493	263066	331345	255328	289353	326457	371996	373903	384972	371911
M173T242	173.164	242.334	Arcaine	[M+H]+		C03047	Organic nitrogen compounds	Organonitrogen compounds	Guanidines	106140	149330	36013.8	37721	33132.3	48796.4	34846.9	42692.8	30038.3	39418.8	31992.9	51746.8	35554.8	28755	32549	19605.1	35535.3	22524	17667	46530.2	114459	25774	29934.3	84920.7	52852.5	52321	52860	50286.4
M373T435	373.16	434.635	Arctigenin	[M+H]+	HMDB0030087	C10545	Lignans, neolignans and related compounds	Furanoid lignans	Tetrahydrofuran lignans	37230.8	53668.3	65112.1	45287.5	72451.7	74481.6	58430.9	47415.7	69144.2	47598	84542.5	60908.2	63757.6	44892.6	61511.6	47692.4	48474.1	44921.9	42205.2	47052.2	55063.3	25253.6	43681.8	52581.4	58689.2	55296.6	55251.2	56386.7
M219T365_1	219.105	365.47	Arecoline	(M+CH3CN+Na)+	HMDB0030353	C10129	Alkaloids and derivatives			97485	69077.8	87305.7	75315	73858.2	17047.7	92361.3	27352.8	54479.5	26178.2	12494.4	63132.4	17328.4	84821.4	95055.7	8621.93	109080	111341	126043	118594	95397.3	28995.2	93573.2	34718.1	40333.6	65167.6	65543.7	65291.2
M417T418	417.22	418.13	Arenobufagin	[M+H]+		C20035	Lipids and lipid-like molecules	Steroids and steroid derivatives	Steroid lactones	38893.2	18483.7	19034.8	29400	22638.4	12796.1	15549.8	34535.6	22456.6	16121.5	15121.6	21243.1	30789.7	62471.2	19716.7	20354.8	38317.4	59220.4	31740.3	23889.9	36373.5	35768.2	62375.5	46353.3	33832.9	28773.5	33859.8	32950.6
M374T197	374.266	197.494	Arg-Ala-Lys	[M+H]+			Organic acids and derivatives	Carboxylic acids and derivatives	Amino acids, peptides, and analogues	23698.4	9631.16	20738.5	12274.8	14000.9	20927.9	17017.2	13692.2	14387	16483.6	18153.2	29744.8	13763.2	6780.55	24370.6	14112.3	13239.7	23745	15775.3	17271.4	13061.9	14718.4	13725	8967.3	21354.8	20794.5	29136.7	23389.4
M487T343	487.346	342.974	Arg-Arg-Arg	[M+H]+			Organic acids and derivatives	Carboxylic acids and derivatives	Amino acids, peptides, and analogues	21611.6	22160.2	22828.2	22957.1	17151	20564	20480	16469.9	23187.3	17874.7	21060.6	19475.7	19361.6	23474.4	24557.7	22298.5	23761.2	32013.9	23043.9	20098.3	28868.2	25803.6	22393.8	25285	24808.7	24810.4	28481.6	24796.5
M289T513	289.149	513.194	Arg-Asn	[M+H]+			Organic acids and derivatives	Carboxylic acids and derivatives	Amino acids, peptides, and analogues	424284	259725	308569	446850	259980	288876	325527	363195	239224	98533.5	319496	268269	312505	515407	347560	345806	404374	413403	454653	500762	366874	443334	395041	280671	657995	657842	663804	677737
M209T516_2	209.152	516.216	Arg-Asn-Lys	[M+2H]2+			Organic acids and derivatives	Carboxylic acids and derivatives	Amino acids, peptides, and analogues	2119.34	4265.94	4182.83	1104.9	3752.3	4212.18	4490.48	5262.12	1407.64	3934.27	4076.99	4179.85	3493.35	4325.99	4398.34	3253.78	3756.95	7679.16	3223.62	4373.33	1734.94	4805.1	1009.09	8738.32	5116.05	5001.79	5116.22	5020.14
M272T345_2	272.134	344.668	Arg-Asp	(M+H-H2O)+						79123.1	40290.1	92835.6	93058.2	160677	77703.8	56013.6	300215	62043.2	61111.6	58825.1	78172.2	137754	99074.2	62462.2	79507.6	60188.1	86886.3	89786.7	82604.4	86712.8	68947.9	99746.3	72586.7	76961.6	76871.8	67377.7	76955.3
M304T445	304.16	444.978	Arg-glu	[M+H]+			Organic acids and derivatives	Carboxylic acids and derivatives	Amino acids, peptides, and analogues	50452.4	55086.1	50390	70653.3	65786.7	60296.1	69888.5	69062.2	46064.3	48336.3	49796.6	26399.4	43845	56585.1	40279.3	40214.3	64503.4	124040	97219.8	78931.2	58697.6	66669.5	59109.6	29569.2	84072.9	79940.1	76881.1	75829.6
M347T361	347.19	361.01	Arg-Gly-Asp	[M+H]+			Organic acids and derivatives	Carboxylic acids and derivatives	Amino acids, peptides, and analogues	21790.8	17209.9	27022.2	16328.5	29182.2	29432.9	15904.9	18866.4	32181.2	14717.6	35930.2	14450.6	26722	26482.2	30526.4	26871.8	28073.6	30475.3	25141.8	28914.6	12171	21954	24311.7	22928	28585.1	29922.4	28578.1	29020.3
M310T270	310.182	270.353	Arg-Ile	(M+Na)+						85391.9	53022.4	52750.1	95235.8	58406.5	69948.4	107703	59117.7	83282.9	70649.4	54018	67361	46735.9	91881.8	77478	64016.6	87028.4	127631	95687.9	72267	53814.7	65246.3	79699.2	51153.2	150525	152694	152711	143530
M230T293_1	230.184	292.568	Arg-Lys-Arg	[M+2H]2+			Organic acids and derivatives	Carboxylic acids and derivatives	Amino acids, peptides, and analogues	39943.7	38965.5	25790.4	37809.8	43908.2	6730.15	45389.8	36067.1	43717.7	39430.1	42088.3	75071.9	38382.5	65701.8	43769.5	37090.2	53516.8	74710.3	72797.8	76711.8	38450.3	66849.3	60164.9	2185.36	70031.5	72436.8	69069.9	70028.1
M322T334	322.184	334.426	Arg-phe	[M+H]+			Organic acids and derivatives	Carboxylic acids and derivatives	Amino acids, peptides, and analogues	43720.1	39171.6	47615.9	43854.6	47634.3	51393.9	23599.4	46738.7	44345.1	52590.9	39669.9	43340.9	22063	51505.9	42879.5	19255.4	42807.5	55836.1	42014.3	57126.9	40995.3	62639.7	63667	65795.1	42088	39754.9	48064	39939.5
M433T414	433.249	413.75	Arg-Phe-Lys	[M+H-NH3]+			Organic acids and derivatives	Carboxylic acids and derivatives	Amino acids, peptides, and analogues	40168.7	34715.3	34442.3	21789.3	37598.6	12131.1	39587.4	36447	11824.1	37835	8927.65	36769.2	16615.8	30289.9	37571	42212	15610.6	33540.4	17524.2	42623.2	41315.7	19685.4	37785.7	21268.8	30755.1	24028.1	23156.4	25863.9
M272T450	272.17	449.635	Arg-Pro	[M+H]+			Organic acids and derivatives	Carboxylic acids and derivatives	Amino acids, peptides, and analogues	127297	94960.3	119497	161332	89552.7	83172.4	118583	142890	58701.5	121644	92337.7	104036	55942.6	193772	126344	28209.7	113367	293497	127119	158785	130506	176717	154659	204283	189111	232400	172481	171206
M262T194	262.154	194.434	Arg-Ser	[M+H]+			Organic acids and derivatives	Carboxylic acids and derivatives	Amino acids, peptides, and analogues	36485.5	27859.6	31223.4	41020.2	37846.5	40125.6	33296.4	28405.8	47213	26056.1	33876.6	34109.5	32956.2	40840.7	40494.5	28829.5	34918.9	27185.4	36272.1	28876.3	33432.2	41434.3	39616.9	21773.6	27279.1	30309.3	29183.3	30372.1
M240T341_2	240.144	341.115	Arg-Thr	(M+H-2H2O)+						294696	455621	378976	415585	457788	458254	411854	340746	410526	248137	554918	464876	451543	142524	448989	410479	337859	130014	266565	262909	397431	141569	289693	242256	361236	386139	383776	386110
M432T322	432.271	321.593	Arg-Thr-Arg	[M+H]+			Organic acids and derivatives	Carboxylic acids and derivatives	Amino acids, peptides, and analogues	44266.1	48151.3	43350.3	50770.8	45725.7	49555.9	44908.1	45612.8	41602	42135.2	40611.5	53797.7	44284.2	38771.6	50664.5	37914.7	38462.6	38354.7	34230.2	41566.4	44968.9	33180.3	52936.6	30557.1	30937.7	30650.7	28267.8	29667.6
M404T330_2	404.276	329.736	Arg-Thr-Lys	[M+H]+			Organic acids and derivatives	Carboxylic acids and derivatives	Amino acids, peptides, and analogues	17875.8	14857	24531.6	36827.5	14445.9	23887.1	13483.2	19079.9	32899.8	9208.61	30761.3	25088.1	19830.1	38770.4	19954.5	32102.8	35905.4	34946	22893.4	20468.6	16098.1	14566.4	35037.7	28606.8	23694.4	24093.8	25008.1	23766
M494T402	494.282	401.906	Arg-Tyr-Arg	[M+H]+			Organic acids and derivatives	Carboxylic acids and derivatives	Amino acids, peptides, and analogues	42130.2	8791.33	20166.8	7571.83	10941.9	12952.1	7038.88	14249.5	13215.5	4540.72	12857.3	8921.1	17793.6	18875.2	9336.08	7679.58	16689.6	10268.2	9810.77	9191.83	6041.67	6034.72	12918.2	5485.39	21259.5	17657.6	17913.3	19523.8
M158T52	158.117	51.8115	Arginine	[M+H-NH3]+	HMDB0000517	C00062	Organic acids and derivatives	Carboxylic acids and derivatives	Amino acids, peptides, and analogues	118017	169545	75051	64633.4	101516	98310.3	82448.3	45278.5	221369	71214.5	87128.1	54048.5	71734.2	75685.7	73236	87738.5	96470.1	42005.6	86854.5	54235.4	87969.4	53586.8	101843	51871.4	80531	80441.8	93394.1	80307.8
M291T396	291.117	396.01	Argininosuccinic acid	[M+H]+	HMDB0000052	C03406	Organic acids and derivatives	Carboxylic acids and derivatives	Amino acids, peptides, and analogues	17732	67404	6009.09	20553.1	63923.5	17387.3	60646	37652.8	52719.7	82381.4	14072.8	65449.3	16833.5	53909.1	25869.9	57258.5	56903.3	40633.7	70502.2	60324.4	47131.5	98306	60798.2	78762.2	46573.7	50150.4	46572.2	53044.3
M247T76	247.117	76.0805	Arglabin	[M+H]+			Lipids and lipid-like molecules	Prenol lipids	Terpene lactones	576040	59446.5	376947	489821	432177	403646	470551	350774	193922	524256	147337	78616.5	477504	389705	173715	317108	457454	272356	414279	104736	442619	344012	473283	184351	397023	398105	401223	397516
M283T398	283.165	397.57	Artemisinin	[M+H]+		C09538	Lipids and lipid-like molecules	Prenol lipids	Terpene lactones	259796	676751	675764	755474	999178	815390	727135	566069	862429	439184	896617	830829	934737	175438	759556	678760	649010	202611	468754	502421	709154	195160	514155	532126	696135	701458	689730	701505
M489T39	489.354	39.1865	Asiatic acid	[M+H]+	HMDB0035782	C08617	Lipids and lipid-like molecules	Prenol lipids	Triterpenoids	92190	92317.5	77728.5	161356	144672	133012	100763	226954	84734.4	81225.8	126479	34112.2	139873	113350	50235.1	75195.3	111433	81059.6	110346	49943.8	95374.5	30094.1	143202	158075	141675	125198	187610	151751
M332T427	332.191	426.58	Asn-Ala-Lys	[M+H]+			Organic acids and derivatives	Carboxylic acids and derivatives	Amino acids, peptides, and analogues	36655.1	40235.9	35462.8	50836.2	32005.7	44990.1	63485.5	37474.2	28371.3	85844	27771.2	54390.9	30022.7	64079.4	17713.8	52473.9	46499.1	83583.8	53004.3	64251.7	62425.2	56716.7	46461.9	89384.8	20293.2	43172.8	43532.9	43284.1
M346T324	346.196	324.026	Asn-Gly-Arg	[M+H]+			Organic acids and derivatives	Carboxylic acids and derivatives	Amino acids, peptides, and analogues	33118.8	30173	25700.9	27130.4	18417.8	42499.7	34113.4	52609.3	28269.8	44771.3	7072.45	40207.3	12238.7	14939.3	23256.2	20539.4	32924.5	59365.2	34345.8	66575.7	29250.1	29969.6	45942.7	71224.9	26649.1	24414.4	32663.8	24364.7
M426T339	426.201	339.072	Asn-His-Arg	[M+H]+			Organic acids and derivatives	Carboxylic acids and derivatives	Amino acids, peptides, and analogues	31495.8	27877.7	21915.1	41371.8	22394.1	29705.2	33053.1	33011.9	23789.1	17661.5	21641.5	30036	33276.9	37545.1	19591.9	20941.6	30815.9	33337.3	22448.2	32675.3	38745.8	32823.6	26552.1	21843.8	38470.3	39308.3	38472	38676.4
M402T364	402.241	364.31	Asn-Leu-Arg	[M+H]+			Organic acids and derivatives	Carboxylic acids and derivatives	Amino acids, peptides, and analogues	58373.5	21207.6	45283.4	53932.7	72073.3	19568.3	21099	36529.1	42707	48931.1	49132.8	12701.3	49180.2	40626.1	63368.2	64901.4	51782.9	36017.7	15064.5	17720.8	17747.4	22754.1	60616.4	25251.4	33322.8	33312.4	27693.2	25930
M389T405	389.236	404.784	Asn-Lys-Lys	[M+H]+			Organic acids and derivatives	Carboxylic acids and derivatives	Amino acids, peptides, and analogues	20712.4	21120.7	16924.9	81512.8	29960.2	39504	28936.4	53006.3	67705	55393.8	6665.34	28180.2	9818.78	31122.5	18202.8	67899.1	35045.9	135020	47773.9	101128	42195	85089.9	58280.1	97073.1	43879.8	49736.4	48422	46696.7
M386T406	386.226	406.173	Asn-Pro-Arg	[M+H]+			Organic acids and derivatives	Carboxylic acids and derivatives	Amino acids, peptides, and analogues	88459.7	98761.4	34613.1	193988	18695.5	83711.9	204725	145170	92905.8	84873.3	103323	38331.7	21818.7	192360	117985	158579	156715	151499	185766	151460	92077.2	179769	85353.8	82829	138436	93502.9	138868	138402
M358T361	358.195	361.291	Asn-Pro-Lys	[M+H]+			Organic acids and derivatives	Carboxylic acids and derivatives	Amino acids, peptides, and analogues	89865.3	68836.8	39822.7	88704.8	76060.7	51674.6	80956.6	81091.7	15519.2	59511.7	72193.2	25860.9	74088	88325.2	17616	71662.7	83976.1	67306.7	89975.2	58219.2	37403.8	84052.7	66491	43693.3	86924.1	86416.7	86415.9	87868.7
M319T62	319.164	61.7435	Asp-Gly-Lys	[M+H]+			Organic acids and derivatives	Carboxylic acids and derivatives	Amino acids, peptides, and analogues	152868	142858	150531	147478	84692.9	184504	105682	107798	281231	126477	151489	91211.4	170535	171027	131011	55838.4	42714.7	148903	140918	78365.6	146990	134477	145049	77708	134176	134176	134174	137784
M375T399_2	375.221	399.101	Asp-Leu-Lys	[M+H]+			Organic acids and derivatives	Carboxylic acids and derivatives	Amino acids, peptides, and analogues	30807.3	17580.5	29299.5	10644.9	14685.9	26063.6	30130.8	40404.2	7860.98	28607.4	33339.7	24441.6	31950.4	43469.8	31952.9	6488.27	17165.2	153884	25584.3	68282.4	8132.81	38039.8	38461.2	46830	28496.2	30904.1	28524.9	28525.6
M567T310	567.326	309.616	Atglistatin	[2M+H]+			Benzenoids	Benzene and substituted derivatives	Biphenyls and derivatives	25789.8	23822.2	21676.4	31496.3	23619.2	25675.4	28000.6	23161.1	49621.9	20784.5	23143.1	16925.2	28834.1	29022.7	26750.6	24120.2	28050.1	31968.9	21621	14498.1	30695.3	20262.5	29278.7	23618	28929.4	28916.3	28175.2	27170.5
M299T172	299.17	172.155	Aurapten	[M+H]+	HMDB0034054		Lipids and lipid-like molecules	Prenol lipids	Terpene lactones	119380	23214.7	106657	82980.3	100180	116920	66681.6	101819	116688	87818.1	125763	116030	96152.2	77483.5	158662	92617.9	130954	50809.1	126435	70492.1	118693	109184	113458	71890.5	92820.4	113004	112977	112847
M291T212	291.169	212.369	Azatadine	[M+H]+	HMDB0014857	C07774				90582.3	84922	107966	207600	66556.3	113710	109340	82184.4	122676	97964.1	105201	99004.8	74670.1	88388.4	107899	88198.9	92249.8	141223	144750	85488.5	109397	97950.3	97015.9	86548.7	148686	141838	148675	146737
M382T381	382.167	381.276	Azelastine	[M+H]+	HMDB0015107	C07768	Organoheterocyclic compounds	Diazanaphthalenes	Benzodiazines	44740.5	48125	58095.5	52732.7	51295.9	95631.4	47978.9	51043.5	47469	58098.3	22697.9	50556.6	57638.7	61069.1	33278.5	59648.9	53297.1	60733.7	69548.1	53782.9	54459.8	90957.5	45967.1	52379.2	41819.2	53505.8	52019	53683.2
M462T168	462.129	168.274	Azlocillin	[M+H]+		C06839	Organic acids and derivatives	Carboxylic acids and derivatives	Amino acids, peptides, and analogues	9190.61	24714.4	11403.8	10178.1	6809.42	9460.62	6937.65	10226.6	7485.67	13597.6	6586.41	9811.04	7077.01	6869.12	4592.91	6593.64	7344.7	6841.93	6369.25	6161.74	6341.72	8698.11	8568.68	9425.01	5976.87	6863.65	6177.02	5983.8
M369T284	369.139	284.438	Azocyclotin	[M+H-C2H3N3]+		C11092	Organoheterocyclic compounds	Azoles	Triazoles	13541.2	11937.6	14689.9	20587.1	15816.2	16468.7	17118.3	21254.1	9437.46	15670.7	8466.26	8530.5	11308.5	17682.6	12204.4	10434.7	16104.1	28478.1	31536.9	16068.8	11770	23625.7	15718.8	13764.6	21114.6	25319.7	26084	26081.3
M387T384	387.197	383.782	Baccatin iii	[M+H-C9H12O5]+		C11900	Lipids and lipid-like molecules	Prenol lipids	Diterpenoids	30540.2	21115.3	20823	54990	18755.7	19085.1	30023.4	18142.5	24599.8	21031	28156.7	26942.8	17247.5	33969.9	24391.8	20039.3	29159	34673.1	33033	29574.4	21326.4	31359.6	17486	26210.6	25546.1	29284.4	29139.2	27392.7
M767T140	767.471	140.01	Bacoside a	[M+H]+						21018.4	23900.2	25970.8	39053.2	34825.9	21647.6	17239	31706.1	30404.3	30506.4	22076.1	59729.1	18344.3	37451.2	32546.2	26146.8	37706.5	38384.3	33396.2	34528.1	12869.1	25848.6	24141.1	21601.3	28277.4	36366.9	28370.5	28213.9
M313T360	313.104	359.714	Baicalein trimethyl ether	[M+H]+	HMDB0128592	C10024	Phenylpropanoids and polyketides	Flavonoids	O-methylated flavonoids	8406.94	17399.9	13644.9	27928.4	16730.3	19393.2	17985.7	21198.8	18339.8	36125.9	19820.1	31660.3	22388.8	35282.1	27631	21322.4	26129.9	48301.5	26197.6	36116.8	35202.6	8916.68	40782.3	26091.6	34108.1	22067	37904	36843.8
M471T285	471.246	285.301	Bazedoxifene	[M+H]+			Organoheterocyclic compounds	Indoles and derivatives	Indoles	35810.7	18866.5	20075.7	22771.7	15602	17971.4	21315.9	19806.4	22952.5	17956.3	11878.6	8343.04	22864.2	13504.6	21984.2	18471.7	23834.9	28687	24277.8	8692.81	19333.6	8546.54	21009.4	9059.04	30093.4	30113.4	40061.8	29028.7
M806T410	806.383	409.504	Beauvericin	[M+Na]+		C11590	Organic acids and derivatives	Peptidomimetics	Depsipeptides	13212.2	15834.5	11460.2	14016.8	15676.7	18219.3	14952	17260.5	4382.15	18881	14985.4	13458.6	12502.9	10071.5	19708.7	15232.7	14894.8	32590.2	16355	18234.7	18559.8	15954.6	12961.7	19515.3	14946.3	13249.5	13545	14898
M669T452	669.182	452.246	Becatecarin	[M+H]+			Organoheterocyclic compounds	Indoles and derivatives	Carbazoles	4210.51	8745.25	4951.36	3117.38	2864.53	8080.06	2340.06	5609.65	5514.89	5669.68	1753.74	5587.27	5010.08	4517.95	14633.4	4496.37	9302.6	5229.05	7194.37	6274.71	8172.14	8251.41	14004.2	15391.5	6985.77	8040.73	6971.83	6981.23
M409T37	409.16	36.74	Beclomethasone	[M+H]+	HMDB0013609	C06842	Lipids and lipid-like molecules	Steroids and steroid derivatives	Hydroxysteroids	61206.1	62410.8	22261.5	75900.2	37808.3	56053.7	54945.4	54582	47301.3	38104.2	64682.7	302824	26705.8	58864.6	202208	39673.6	25725.1	9621.01	61364.3	232547	56963	30328.3	52154.8	35623.1	54758.3	52064.5	57489.9	43234.5
M348T399	348.164	399.06	Benalaxyl	[M+Na]+		C10929	Organic acids and derivatives	Carboxylic acids and derivatives	Amino acids, peptides, and analogues	128866	232402	188339	244486	302295	278456	227383	196987	289998	132258	257211	244033	233824	68523.3	219897	173493	183678	72566.3	154334	146062	201699	96223.9	157959	194569	180960	183730	186277	195080
M228T211	228.113	211.249	Benz[a]anthracene	[M]+		C14317				106678	132761	100938	94148.6	69809.1	92029.6	88780.4	87595.2	130611	112507	97979.7	100883	67165.9	97758.2	125832	69270.9	63055.4	70337.1	109617	58617.3	82236	129972	122974	50318.8	89086.6	92750	90868.1	89139.5
M122T92	122.059	92.11	Benzamide	(M+H)+						76117.9	68740.2	65951.8	66176.3	41040.4	82969.9	70458.3	68939.7	80377.9	65857.2	77572.3	35876.3	11600.8	72417.6	27497.1	85378.1	61644.7	63851.7	68888.8	12101.7	70772	70578.2	62091.1	53682.9	77302.5	76198.8	74925.1	73833.2
M290T56_2	290.295	56.003	Benzamide, n-(5z,8z,11z,14z)-5,8,11,14-eicosatetraen-1-yl-4-hydroxy-	[M+H-C7H4O2]+			Benzenoids	Benzene and substituted derivatives	Benzoic acids and derivatives	73478.2	71101.3	81329.6	61773.6	73564	67969.3	74460.1	69140	75525.5	67955.2	72195.1	57130.2	84259.1	73060.1	53085.9	67470.3	66307.9	96370.4	69992	61941.1	69742.9	67336.9	67264.1	72960.1	85490.4	85521.9	79133.8	85484.4
M521T43	521.258	42.8515	Benzamide, n-[2-[[(3r)-1-[trans-4-hydroxy-4-(6-methoxy-3-pyridinyl)cyclohexyl]-3-pyrrolidinyl]amino]-2-oxoethyl]-3-(trifluoromethyl)-	[M+H]+			Benzenoids	Benzene and substituted derivatives	Benzoic acids and derivatives	100908	31671.4	83842.8	125056	78587.3	34049.5	13935.3	86437.8	43677.8	80206.8	92993.1	34073.7	12476.6	32639.6	72517.8	108231	23169.9	83421.2	111385	64201.3	82999.4	87276	39744.8	86621.8	84263.6	53346	84086.5	84227.7
M464T454	464.246	453.648	Benzamide, n-[5-[2-(3,5-dimethoxyphenyl)ethyl]-1h-pyrazol-3-yl]-4-[(3r,5s)-3,5-dimethyl-1-piperazinyl]-, rel-	[M+H]+			Organoheterocyclic compounds	Diazinanes	Piperazines	45127.8	35428.8	39141.9	47273.9	52681.1	49005.2	45825.3	41579.5	52235.5	31067.6	45423.7	51785.6	40620	34585.5	40794.2	44977.8	48554.4	4623.52	32239	36229.1	35568.8	32379.1	43527.7	45105.1	51288.9	52145.2	53037.1	52820.3
M405T216	405.168	215.984	Benzenebutanoic acid, 4-cyano-2-[[2-(4-fluoro-1-naphthalenyl)-1-oxopropyl]amino]-	[M+H]+						19389.9	11743	17759.1	20270.2	18108.5	23055.2	23838.7	15012.9	15411.7	17668.3	16314.7	21418.1	14581.2	15140.9	22425.8	21690.4	26050.7	25296	18127.7	21532.1	11660.9	23831.8	13270.7	10087.2	23056.8	22041	23039.2	18510.4
M302T204_2	302.174	204.333	Benzeneethanamine, 2,5-dimethoxy-n-[(2-methoxyphenyl)methyl]-	[M+H]+			Benzenoids	Benzene and substituted derivatives	Methoxybenzenes	89854.8	81525.9	85161	109737	86965.7	72537.2	80369.1	85522.1	90768.2	75459.3	89951.4	93600.2	78617.5	100859	98281.1	88296.3	93699.4	95215.5	109774	76245.3	81140.7	72364.3	90736.4	72300.4	115819	108374	108373	108384
M254T112	254.188	112.134	Benzeneethanamine, 3,5-dimethoxy-.alpha.-methyl-4-propoxy-	[M+H]+			Benzenoids	Benzene and substituted derivatives	Phenethylamines	89409.8	126197	85804.1	66158.4	37806.2	106911	61606.8	63705	176326	82935	133619	48617.8	125652	112737	57040.5	16121.2	9147.24	85967.5	123866	25635.9	67033.2	65864.2	118115	39175.8	105012	99511.4	98425.2	105081
M525T339	525.193	338.592	Benzenepropanoic acid, 5-(3-carboxybenzoyl)-2-[[(5e)-6-(4-methoxyphenyl)-5-hexen-1-yl]oxy]-	[M+Na]+			Benzenoids	Benzene and substituted derivatives	Benzophenones	8875.32	13089.1	15876.3	18040.3	7216.15	13315.8	12013	15761.7	8679.19	14495	15656.8	13456.6	13541.6	13996.5	15430.6	14910.4	18191.2	12053.9	23098	15640.1	16388.5	18579.2	7866.1	16235.7	14095.4	14304.7	14326.2	17886
M590T517	590.262	516.816	Benzoic acid, 3-[[(3-carboxycyclohexyl)amino]carbonyl]-4-[3-[4-(4-phenoxybutoxy)phenyl]propoxy]-	[M+H]+			Organic acids and derivatives	Carboxylic acids and derivatives	Amino acids, peptides, and analogues	29098.9	40841.8	43277.8	39868.1	21641	86549.9	39856	38273.9	19094.6	101938	30119.7	114645	27988.3	29590.7	34813.5	20561	32768.3	63058.5	255936	98300.8	29042.8	95516.9	74075.7	172995	79267.4	81706.3	81705.4	81709
M618T289_2	618.298	288.547	Benzoic acid, 3-[[(3-carboxycyclohexyl)amino]carbonyl]-4-[3-[4-[4-(cyclohexyloxy)butoxy]phenyl]propoxy]-	[M+Na]+			Organic acids and derivatives	Carboxylic acids and derivatives	Amino acids, peptides, and analogues	23801	6485.54	24897.7	66577.3	24239.4	22899.3	19485.7	18920.4	20755.6	23569.5	21071.4	23724.2	6972.41	29117.5	32846.1	27693.5	43247.4	65273.3	55576.9	36595.3	25750.5	34512.4	38930.2	33393.9	45236.3	45166	40048.9	44255.5
M574T397	574.315	396.632	Benzoylhypaconine	[M+H]+			Lipids and lipid-like molecules	Prenol lipids	Diterpenoids	14153.7	12364.7	14202.9	6433.63	15644.7	8619.6	14290.3	10032.7	12551.5	12218.1	12703	6076.07	14463.6	11316	14641.8	4640.32	17350.9	15363.4	14389.8	11830.5	7246.44	18295	9671.12	15870.2	11585.2	10485.4	10509.5	13010.8
M551T231	551.223	231.048	Benzoylnorecgonine	[2M+H]+			Benzenoids	Benzene and substituted derivatives	Benzoic acids and derivatives	10593.4	14520	22440.7	20623.5	10854.1	18199.3	19644.7	32663.9	21786.1	11455	25076.7	13715.8	19697.6	33272.3	12398.2	16351.7	21993.2	17611.3	41493.6	22026.7	14604	27445	17759.8	15916.3	21107.4	17321	17404.5	17409.1
M91T218	91.0534	218.195	Benzyl alcohol	[M+H-H2O]+	HMDB0003119	C00556	Benzenoids	Benzene and substituted derivatives	Benzyl alcohols	30586.4	36133.6	41358.1	44946.8	38592.4	46497.9	37510.6	50903.8	48376.9	129854	94137	36109.2	62380	110160	65848.2	47101.5	56250.4	43765.8	95923.3	51741.9	51859.9	112120	77291.9	40881.1	62678.1	62687.4	61894.9	59862
M235T272	235.117	272.309	Benzyl-2-naphthylether	[M+H]+						22532	32639.9	13492.1	13799.3	18699.5	31188.9	25407.5	19240.6	26905.8	16904.2	20556.6	31368.1	21120.8	19639.2	20421.7	20680.9	23894.5	25678.5	22310.5	21008.8	14107.5	17801.8	23355	16060.3	22522.2	24413.7	22582.8	24377
M149T128	149.106	127.674	Benzylazanium	(M+CH3CN+H)+						16177.7	4756.11	15014.7	15459.3	7152.01	15700.5	2010.95	17568.5	7673.92	18586.8	7999.35	14364	17985.6	17127.2	8320.18	15425.8	15206.1	17164.5	17313.2	13163.6	16493.7	17795.1	16956.8	15688.3	13292.3	15603.2	15626.7	15608
M609T83	609.306	82.597	Berbamine	[M+H]+		C09357				89829.8	94640.7	75388.9	114414	35883.5	59648	76565.8	66776	53308.6	43232.3	59295	104408	90821.4	83668.3	201320	40052.2	59767.3	8113.27	67982.7	176342	54754.3	79714.6	50845.1	76982.7	92433	79062.6	95330.7	92634.3
M449T397	449.194	396.618	Beta-estradiol 3-(beta-d-glucuronide)	[M+H]+			Lipids and lipid-like molecules	Steroids and steroid derivatives	Steroidal glycosides	93197.7	94172.2	91344.3	128089	82718.8	39793.6	201262	79836.4	109821	48185.3	70087.2	84861.4	228759	133525	43525.7	126120	311015	152536	107842	75608.1	66053.7	102698	195851	172400	137784	199149	198976	183729
M159T95	159.113	95.135	Betaine	(M+CH3CN+H)+	HMDB0000043/HMDB0059606	C00719	Organic acids and derivatives	Carboxylic acids and derivatives	"Amino acids, peptides, and analogues"	109696	70775	64779.1	82794.2	60730.4	74929.1	68750.2	72125.6	78352.5	73430.3	72849.7	45449.8	81409.9	62916.7	55071.8	41391	62267.2	24512.1	81995.6	46694.5	95400.4	36662.2	82522.3	55205.5	86409	86342.8	88864.8	86347.7
M411T306	411.232	306.447	Betamethasone 9,11-epoxide 21-propionate	[M+H-H2O]+			Lipids and lipid-like molecules	Prenol lipids	Monoterpenoids	40148.9	32475.6	45666.5	36245	23671.9	21603	24436.3	28473	37489.1	19789.3	40047.4	19478.5	35107.4	40756.7	28904.1	22500.5	40555.4	33272.2	42517.8	40857.2	26110.4	33062.2	33605.1	41457.5	41778.1	41946.7	40704.3	38051.6
M505T304	505.257	304.007	Betamethasone dipropionate	[M+H]+			Lipids and lipid-like molecules	Steroids and steroid derivatives	Pregnane steroids	49563.4	29463.3	20446.2	52853	26322.3	17756.3	26751.1	40215.5	18527.8	24546.3	33433.5	23837.1	20037.8	33852.2	18153.1	29600.6	35159.3	42050.8	42572.9	23893.6	37401.6	30927.4	16235	30276.6	38494.2	37238.7	38422.8	34038.1
M384T228	384.107	228.079	Bezafibrate	[M+Na]+	HMDB0015465		Benzenoids	Benzene and substituted derivatives	Phenoxyacetic acid derivatives	28725.6	11201	19120.6	21508.6	25782.8	12041.4	6181.04	19084.9	6736.48	19313.8	15686.1	11893.7	17959.5	15916.2	12206.4	15135.5	39067.2	41239	31540.3	23888.5	18038.1	37698.4	20303	24633.2	25279.4	27696.6	27711.9	27012.5
M323T386	323.158	386.033	Bifenazate	[M+Na]+		C18589	Benzenoids	Benzene and substituted derivatives	Biphenyls and derivatives	55125.1	115205	131761	162036	200492	191656	161389	122252	74854.7	56546.1	69898.3	182597	86082.3	34431.5	158699	54410.9	64908.5	55919.1	115894	88180.9	157694	66153.4	55477.6	100539	106271	80348	72528.8	73365.3
M583T227	583.253	226.794	Biliverdin	[M+H]+	HMDB0001008	C00500	Organoheterocyclic compounds	Tetrapyrroles and derivatives	Bilirubins	16597.8	12984.8	16705.9	19851.3	15234.1	7578.55	8903.89	15928.6	13493.7	14922.8	14072	15976.3	13236.9	18658	16121.3	16677.3	7072.01	21904.2	48104.3	17249.3	13309.6	25869.4	21414.6	23951.3	13836.7	12699.4	13384	11768.7
M370T207	370.234	206.669	Bimatoprost amide	[M+H-H2O]+			Lipids and lipid-like molecules	Fatty Acyls	Eicosanoids	38535.6	48156.8	34141.9	57428.3	40846.9	47267	42312	43097.3	42416.1	43622.3	57804.1	41702.5	29027.6	39882.4	86541.8	51681	47707.9	49260.3	60059.8	38682.8	44126.2	40819.8	38485.9	43256.6	62375.7	64706	64779.6	62805.7
M325T328	325.175	328.433	Bindarit	[M+H]+			Organoheterocyclic compounds	Benzopyrazoles	Indazoles	74589.5	182671	96871.2	110810	161491	166987	120048	97046.5	133056	94718.8	205432	149404	97959.3	90773.7	105244	88672.3	107441	120511	120096	99417.5	90056.6	118681	140708	99953.7	92796.9	84261.9	85286	84204.5
M321T400	321.184	400.213	Bioresmethrin	[M+H-H2O]+		C16810	Lipids and lipid-like molecules	Prenol lipids	Monoterpenoids	20153.7	38691.4	28369.8	40624.1	53594.1	19531.5	34013.3	18924.6	43735.4	16906.5	27220.9	30099.5	28386.7	18135.4	21194.2	41154.5	23903.8	16938.6	18610.6	23899.9	41142.9	14153.7	18118	31425.3	34536.9	33724.3	30355.3	32859.5
M507T514	507.281	513.974	Biotin-xx hydrazide	[M+Na]+						22885	31653.8	9020.63	10543.2	25183.7	17403.7	9893.93	17749.1	42839.7	15606.5	31061.1	17304.8	11788.3	18826.6	8993.53	17315.3	10421.9	13223.3	3595.6	18854.8	6764.07	8158.04	12068.3	3117.6	30524.8	30856.3	31502.7	30523.3
M393T219	393.308	218.697	Bis(2-ethylhexyl) adipate	[M+Na]+	HMDB0040270	C14240	Lipids and lipid-like molecules	Fatty Acyls	Fatty acid esters	26315.9	41847.2	37416.8	26031.4	18037.4	29881.1	42051.6	35370.6	33105.2	28379.8	34423.1	37448.3	38404.7	78995.4	42135.7	16709.5	39261	28417.2	42780.5	35928.9	21601.4	35414.3	23938.3	30979.8	31390	34737.1	31412	31362.2
M348T376	348.234	375.909	Bisoprolol	[M+Na]+	HMDB0014750	C06852	Benzenoids	Benzene and substituted derivatives	Benzylethers	20327.2	16421	18168.8	22502.4	22799.9	25205.4	20720.9	20278.3	18200.6	17579	24920.7	17393.2	7734.38	4715.98	21438.3	16820.4	24831.5	26563.4	19883.3	21695.1	24219.8	22160.4	18295.8	12195	9368.98	5932.56	9475.05	8927.18
M149T42_2	149.095	41.68	Bisphenol c	[M+H-C7H8O]+		C14339	Benzenoids	Benzene and substituted derivatives	Diphenylmethanes	200796	220667	369702	276883	188837	209595	220521	162277	178673	203674	178566	132454	211572	289105	252565	136832	194345	291907	212380	141113	385472	223631	274680	306980	262719	307614	238796	193033
M436T190	436.279	189.903	Borrelidin	[M+H-3H2O]+		C15687				93701.6	69104.2	55913.7	75825.3	76450.1	39650.5	68231.2	25739	118394	47043.5	91413.9	42829.4	83760.5	101142	38134.6	35100.5	60439.3	62927.5	69387.2	59636.4	40817.7	59771.6	63086.4	30682.6	85403.4	83239.3	82107.8	82121.3
M336T179	336.1	178.885	Bromobutide	[M+Na+2i]+		C14568	Benzenoids	Benzene and substituted derivatives	Phenylpropanes	100118	167219	104943	30281.3	163442	176935	122081	47384.3	84224.1	63983.4	67859.4	114445	73282.3	48095.6	71245.6	41414.6	15211	74131.4	17449.7	128276	39262	75281.3	133027	31379.1	111901	109517	111891	111883
M395T352_2	395.194	352.316	Brucine	[M+H]+	HMDB0060665	C09084				50910.1	129723	54304.6	15634.4	47053.8	56859.4	60442.7	49660.7	52577.3	51248.3	58158.7	61626.4	54082.3	54205.7	56990.3	56914.5	61948.8	57617.4	58393.1	52313.2	49912.5	52230.7	54138.6	52930.5	64054	64059.1	66073.1	64055
M387T307	387.269	307.052	Bufalin	[M+H]+		C16922	Lipids and lipid-like molecules	Steroids and steroid derivatives	Steroid lactones	20189.5	17538.9	7348.7	19801.8	8359.39	11894	17086.8	45634	3851.3	37651.1	7941.03	31287.5	4756.91	12195.1	6237.7	5156.73	11316.1	162467	21646.3	97361.1	36884.1	33043.5	84667	69075.2	33078	39447.7	33236.8	33156.8
M445T391	445.237	391.368	Bufotalin	[M+H]+		C16923	Lipids and lipid-like molecules	Steroids and steroid derivatives	Steroid lactones	23563.4	13505.3	13612.8	22858.7	19085.2	18531.2	19576.1	19516.5	10187.2	21725.3	9400.53	18490.6	22095.6	28854.6	25239.2	6868.23	22293.9	32017.5	30361	24986.3	21018.3	23660.6	23020.7	17220	25926.9	26122.3	25361.6	25471
M317T421	317.169	420.805	Bupirimate	[M+H]+		C18776	Organoheterocyclic compounds	Diazines	Pyrimidines and pyrimidine derivatives	160359	95225.8	113825	129205	113970	96437.3	117722	79473	114216	78482.6	130730	74422.1	128736	105231	117717	115530	81699.5	92543	106659	85387.3	94847.5	86905	121435	73654.8	117296	133287	130079	133128
M551T196	551.302	195.67	Butanamide, n-[(3s,5s)-1-(1,3-benzodioxol-5-ylmethyl)-5-(1-piperazinylcarbonyl)-3-pyrrolidinyl]-n-[(3-methoxyphenyl)methyl]-3,3-dimethyl-	[M+H]+			Organic acids and derivatives	Carboxylic acids and derivatives	Amino acids, peptides, and analogues	47653.1	21968.7	36219.4	65884.9	32968.4	51252.2	58979.7	32440.7	39502.3	32154	39406.8	43574.2	33851.4	46014.6	38430.4	31736.8	57751.3	69345.9	52592.7	43278.7	21922.9	36375.8	42973.2	41903.3	59422.5	59390.5	59428.4	66294.5
M356T515	356.216	515.165	Butanediamide, n4-hydroxy-n1-[(1s)-1-(1h-indol-3-ylmethyl)-2-(methylamino)-2-oxoethyl]-2-(2-methylpropyl)-, (2r)-	[M+H-H3NO]+			Organic acids and derivatives	Carboxylic acids and derivatives	Amino acids, peptides, and analogues	112429	74436	85903.2	248487	87404.3	83287.6	87283	94445.4	74824.4	64016.8	90394.8	60081.5	141736	127007	175299	85262.1	72658.6	236306	113905	98303	111048	100150	108268	83328.7	150913	170199	170901	162007
M310T287	310.2	286.974	Butorphanol	[M+H-H2O]+		C06863	Benzenoids	Phenanthrenes and derivatives		81944.3	73417.1	72712.5	92748.4	69538.9	84162.7	86854.7	66939.6	81374.4	54096.3	86525.4	89070.1	96949.6	41049.2	89794.3	69913.9	64117	43601	87897	72032.9	77738.7	38332.5	74138.6	52967.2	93162.8	94087.6	96718.7	90720.9
M240T146	240.122	145.571	Butralin	[M+H-C4H8]+		C18582	Benzenoids	Benzene and substituted derivatives	Aniline and substituted anilines	864542	936631	752383	337666	788535	742883	273172	442833	1.06052e+06	364067	887195	320741	447185	917581	321666	227373	432862	457004	452604	382028	272064	361799	425513	246395	757970	551489	551495	588129
M195T358	195.112	357.523	Butyl 4-hydroxybenzoate	[M+H]+	HMDB0032575		Benzenoids	Benzene and substituted derivatives	Benzoic acids and derivatives	82158.6	87154	26792.8	72367.9	35701.8	92542.9	80371.1	72321.1	79354.3	64123.6	76936.5	75379.3	79179.3	49261.6	78927.1	68708.3	69879.6	42570.5	59271.6	56324.3	90765.6	58989.6	72413.1	61412.6	82536.6	83478.1	82545.5	86229.5
M452T291	452.309	290.818	Cabergoline	[M+H]+	HMDB0014393	C08187	Alkaloids and derivatives	Ergoline and derivatives	Lysergic acids and derivatives	129199	160604	119288	188173	105810	178964	285677	128816	122526	57218.3	186284	154424	141553	191790	143597	186291	218474	354027	203730	195070	110740	50227.7	182077	138565	366852	363006	373095	368620
M299T296	299.195	296.477	Cafestol	[M+H-H2O]+	HMDB0035710	C09066				39447.4	94900	44111.8	60373.5	125114	73866.2	59445.1	46766.6	58512.8	33415.2	76328.9	75379.8	56014.7	78311.9	57031.7	91271.1	75011.4	77674.6	53877.6	87228.1	88570.5	36182.2	93191.7	43040.9	78023.2	92244.2	97654.1	97676.2
M424T281	424.242	281.261	Calpain inhibitor ii	[M+Na]+			Organic acids and derivatives	Carboxylic acids and derivatives	Amino acids, peptides, and analogues	36317.7	25363.4	43597.5	46889.3	31307.1	17872.6	49215.6	18429	39590.5	18267.2	29057.5	43242.6	32380.6	52673.2	35182.1	32117.6	51008	82817.8	41958.8	51550.2	25549.7	32956.7	41053.1	41790.7	87548.4	86147.2	82108.7	86707.9
M197T223	197.091	223.402	Cantharidin	[M+H]+		C16778				25076	23614.4	16952.6	24925.9	22750.9	26235.9	27438.4	24652.7	23792.3	18873.7	12128.6	20742.2	19755.1	25499.9	22272.2	20991.9	26190.5	19042	30095.3	19131.1	29853	41963.2	29368.8	20322.7	31505.6	33550.2	31497.7	31496.9
M600T335	600.399	334.845	Capsanthin-3,6-epoxide	[M]+			Lipids and lipid-like molecules	Prenol lipids	Tetraterpenoids	8315.62	5638.1	7778.28	13670.9	10620	8059.77	9594.35	7734.68	6823.76	5458.08	1866.96	7197.36	8292.41	7531.85	10559.5	6252.15	11929.5	4257.02	9345.18	10293.3	2457.73	9085.93	12800.9	9021.91	6180.99	8962.07	9007.55	8982.78
M116T324	116.07	323.594	Captopril	[M+H-C4H6SO]+	HMDB0015328	C06867	Organic acids and derivatives	Carboxylic acids and derivatives	Amino acids, peptides, and analogues	124040	175694	121365	105476	120509	177768	174864	131225	151708	155786	166771	152659	138430	128201	142477	147988	120469	162231	159950	157277	170131	180747	134079	157119	147451	134274	134077	139048
M214T204	214.047	204.276	Carbanolate	[M+H]+		C18950	Benzenoids	Benzene and substituted derivatives	Phenyl methylcarbamates	3773.63	14708.6	17587.4	18867.9	3417.31	16300.1	15549.6	11599.5	3493.77	18953.3	5787.23	9800.61	29092.8	6494.33	3777.34	10112.6	5577.47	7955.73	12465.2	13628.1	2816.11	29190.5	9803.82	23924	11273.1	10824.5	10807.4	12064.1
M227T404	227.102	403.815	Carbidopa	[M+H]+	HMDB0014336		Phenylpropanoids and polyketides	Phenylpropanoic acids		67320.4	83188	135227	132433	93528.8	91115.8	84982.2	86015.4	116353	80877	95273.1	112772	89344.4	111672	100845	111983	127514	94990.7	65668.4	77921.7	90550	86742	76178.4	83229.5	86942.8	89064.4	83624.1	90776.4
M217T244_1	217.096	243.826	Carboline base + 4h, carboxylic acid	[M+H]+	HMDB0035665		Organoheterocyclic compounds	Indoles and derivatives	Pyridoindoles	132081	143925	124256	199768	112665	168216	122923	150249	78843.2	117769	141064	125288	115312	143611	159595	132748	126628	174372	161326	126267	159068	148648	167062	97087.7	169335	165928	165929	165930
M500T278	500.303	278.376	Carebastine	[M+H]+			Benzenoids	Benzene and substituted derivatives	Diphenylmethanes	14035.1	22070.8	20781.8	18325.7	29859.7	22446.9	27897	23788	20651.2	20409.5	22311.1	21849.8	19202.8	23999.2	24605.7	33030.4	33091.8	49742.2	19041.8	25551	21773.7	23885.3	27865.1	16711.5	34464.2	34513.7	37657.7	35530.7
M158T353	158.116	352.758	Carisoprodol	[M+H-C4H9O2N]+	HMDB0014539	C07927	Organic acids and derivatives	Carboxylic acids and derivatives	Amino acids, peptides, and analogues	33013.5	169463	66200	60489.3	119150	161720	89506.4	49136.6	124152	51271.1	106554	151396	93924	26522.2	78311	65465.7	52915.8	28060.4	43418	44879.5	93597.4	25089.2	53309.9	47874.3	74648.5	74375.2	74897.9	74167.7
M313T391	313.175	390.79	Carnosol	[M+H-H2O]+	HMDB0002121	C09069	Lipids and lipid-like molecules	Prenol lipids	Terpene lactones	90626.3	327748	467210	137166	414255	401108	334146	256739	421392	241837	374759	372791	336762	65878.2	330199	304148	313993	72839	92874.9	111808	330760	73732.5	92925	238281	245217	191410	244668	209238
M407T357	407.192	357.267	Carvedilol	[M+H]+	HMDB0015267	C06875	Organoheterocyclic compounds	Indoles and derivatives	Carbazoles	76682.2	63599.2	75534.8	85680.4	79382.5	70716.1	74321.8	108883	69209.5	76634.7	82756.3	71870.5	83039.5	95622.8	81380.2	76479.4	95383.1	97499	88982.4	91016.3	74542.4	92586.6	95318	81737.8	79913.3	85101.3	76649.8	82042.8
M121T356	121.1	356.02	Cedrol	[M+H-C6H14O]+		C09631	Lipids and lipid-like molecules	Prenol lipids	Sesquiterpenoids	20502.5	17159.7	24828.8	30616.9	21114.4	23603	19851.4	27763.5	18637	14871.1	18480.4	18403.7	23937	15419.1	21785.8	22322.9	30408.6	25138.2	25579.2	22270.2	24039.1	22882.5	23696.5	15383	22020.1	22021.3	20570.3	21689.8
M467T285	467.272	284.539	Cephaeline	[M+H]+		C09390				19480.9	23814.5	22456.6	35053.7	28557.3	24014	33467.2	21777.7	26922.2	25120.5	26778	36112.4	24555.1	34928.1	32647.8	32338.6	30432.8	54993.4	50046.1	38786.9	25443.6	30430.3	27733	18405.4	47461.3	49845	47496.3	48502.1
M316T321	316.153	321.012	Cephalotaxine	[M+H]+		C10580				774773	897831	628908	723252	738434	931728	923580	917942	828618	663055	755076	1.20762e+06	1.04114e+06	277285	750897	585041	388135	233234	395433	492497	880760	250560	602360	443906	370158	359909	355576	370454
M460T415	460.273	414.661	Cerivastatin	[M+H]+		C07966	Organoheterocyclic compounds	Pyridines and derivatives	Phenylpyridines	7787.09	8790.95	8147.29	16580.9	8140.18	7524.76	15346.4	32423.5	5601.9	22970.1	8994.84	10265.6	7496.24	13664.6	13802.6	10016	18423.6	26521.1	13279	20609.2	16808.2	19482.6	29060.8	21476.1	17084.1	16923.9	18705.2	19076.8
M362T185	362.303	185.196	Cetaben	[M+H]+			Benzenoids	Benzene and substituted derivatives	Benzoic acids and derivatives	75244	116050	86682	119980	64325	83389.2	114159	72411.9	93009.4	70553.8	97951.9	99140.4	79288.7	109675	108607	66380.4	72151.6	118673	115181	87229.2	76233.4	70108	88698.2	59354.4	138454	141170	137093	137080
M492T441	492.278	440.99	Cevadine	[M+H-C5H8O2]+			Lipids and lipid-like molecules	Steroids and steroid derivatives	Steroidal alkaloids	31024.4	13853.5	25783.5	46189.2	25088.4	28777.9	20574.7	27332.4	23554.7	16074.7	11237.2	4063.05	22442.1	27593.4	28329	14166.4	33505.1	46846.8	28690.7	27636	9899.4	29280.6	31539.3	26147.8	37314.8	30542.9	36510.1	37353.6
M529T450	529.257	450.322	Chaetoglobosin c	[M+H]+			Alkaloids and derivatives	Cytochalasans	Chaetoglobosins	12958.7	6629.32	7796.12	34191.1	12789.5	11765.5	16315.9	30777.5	11326.8	21735.1	6852.26	11592.6	5921.28	24215.2	18148.4	9492.26	19074	22405.5	18676	28741.1	12241.2	18466.4	17187.8	35743.8	22202.6	34476.7	22587.5	22645.9
M257T326_2	257.148	326.222	Chanoclavine-i	[M+H]+		C09131	Alkaloids and derivatives	Ergoline and derivatives	Clavines and derivatives	106833	135457	110405	135389	107299	131581	105971	104080	127094	96159.6	154812	121657	122908	87464.5	116867	117222	116149	77395.9	98174.3	96843.5	110973	83454.7	105191	87490.4	89092.8	90037.9	92539.8	99329
M438T288	438.226	288.32	Chemotatic peptide	[M+H]+		C11596	Organic acids and derivatives	Carboxylic acids and derivatives	Amino acids, peptides, and analogues	47179.4	40862.3	42215.1	79373.9	44285.4	43694.7	64869.8	48194.7	41733.4	20779.1	38840.7	42064.3	43404.2	47226.9	56845.1	47761.9	58812.2	36356.6	25887	49554.8	42854.9	36385	54664.8	59574	30353.3	31786	31856.3	25747.2
M323T354	323.144	354.168	Chitobiose	[M+H-H2O]+	HMDB0003556	C01674	Organic oxygen compounds	Organooxygen compounds	Carbohydrates and carbohydrate conjugates	47798.9	26643.4	31886.6	46739.8	29698.1	32813.9	28643.3	36686.3	38380.2	53299.8	32631.7	34182.6	40270.7	38839.6	30411.7	32332.2	42581.7	41891	83027.8	45487.2	44487.1	53188.7	39208.6	40591.9	45558.7	45238.7	46920.5	44649.4
M345T423	345.164	422.654	Chlormadinone acetate	[M+H-C2H4O2]+		C12729	Lipids and lipid-like molecules	Steroids and steroid derivatives	Pregnane steroids	171165	202610	218265	212631	211721	216896	192957	175961	232527	151153	251038	204864	254189	140439	208605	216158	210973	156773	162394	175850	204092	98371.2	144977	184510	227209	210916	213703	210872
M320T400	320.183	399.721	Chloroquine	[M+H]+	HMDB0014746	C07625	Organoheterocyclic compounds	Quinolines and derivatives	Aminoquinolines and derivatives	47006.6	84213.7	76246.6	94182.1	115440	102306	84463.4	77990.1	107184	59236	112495	79244.9	108007	38682.7	97281.6	90645.5	89236.8	35364.8	78289.7	67031.6	99337.4	57601.1	80107.2	62224.2	85653.9	73490.3	89520.6	89610.9
M426T210	426.318	210.309	Cholic acid	[M+NH4]+	HMDB0000619	C00695	Lipids and lipid-like molecules	Steroids and steroid derivatives	Bile acids, alcohols and derivatives	5055.73	26503.5	13625.3	11073.6	5982.61	7303.72	15864.5	3440.59	17913.8	13024.3	16447.2	38166.5	8407.26	12824.6	281933	69733.7	38255.7	27285.9	17263.9	4808.95	14098.9	20277.7	12185.6	16131	39065.6	39057.2	38501.6	37165.4
M262T154	262.071	153.606	Cidofovir	[M+H-H2O]+	HMDB0014513	C06909	Organoheterocyclic compounds	Diazines	Pyrimidines and pyrimidine derivatives	24832.2	35330.2	58371.5	27385.2	50921.3	41876.4	26328	44665.5	35661.7	41368.6	34633.9	14761	18909	47871.7	52118.4	39307.9	38577.4	17255.3	17034.2	12042.6	26424.8	46106.6	17673.6	13218.9	28943.9	29122.4	39797	29437.9
M657T307	657.346	306.539	Cimicifugoside h 2	[M+Na]+			Lipids and lipid-like molecules	Steroids and steroid derivatives	Cycloartanols and derivatives	34977.7	44392.2	40386	50430.7	43408.8	38868.2	32377.4	38263.7	45240.6	33645.8	41454.8	40192.3	38035.1	46433.2	46781.1	42098.1	45747.1	42707.2	39804.5	36691.1	35492	42661.7	45981.2	33958.8	40895.5	38991	38978.5	38981.4
M295T401	295.165	401.274	Cinchonine	[M+H]+	HMDB0030282	C06528				620801	1.77567e+06	1.56605e+06	1.70115e+06	2.36804e+06	2.10777e+06	1.82264e+06	1.36314e+06	2.07117e+06	1.02676e+06	2.15337e+06	1.92625e+06	1.87712e+06	312905	1.78906e+06	1.70861e+06	1.37238e+06	378101	981238	1.2061e+06	1.69894e+06	413873	1.10117e+06	1.13422e+06	1.54382e+06	1.57311e+06	1.573e+06	1.564e+06
M117T203	117.054	202.593	Cinnamyl alcohol	[M+H-H2O]+	HMDB0029698	C02394				23537.6	14565.2	16630	22204.4	14006.7	18803	14798.7	17197.8	15530	32545.9	16138.1	15572.2	22527.4	17105.2	14665.3	20089.5	24567.3	14595.3	16194.9	18249.1	14189.8	25989.8	18818.3	9872.19	23821	25354.8	24228.1	23818.3
M183T266	183.062	266.275	Cinosulfuron	[M+H-C9H13NO4S]+		C18818	Benzenoids	Benzene and substituted derivatives	Benzenesulfonamides	53334.9	60841.2	45222.8	18056.7	40180	38682.4	39940.3	29171.5	72616.4	18413.3	58993.4	36068.5	32707.1	32198.1	38870.8	38610.6	31484.9	24451.4	27053.2	30655.3	33212.8	18650.8	25347.6	28379.4	23150.9	20290.5	23067.6	23161.1
M332T343	332.148	343.44	Ciprofloxacin	[M+H]+	HMDB0014677	C05349	Organoheterocyclic compounds	Quinolines and derivatives	Quinoline carboxylic acids	370264	444510	438718	590008	468985	448759	410540	375227	452325	347378	485412	418072	465382	163802	449068	442318	391058	169885	494313	345048	425180	320862	338566	327504	479911	419302	418755	419134
M280T408	280.153	408.368	Cis-2-tert-butoxycarbonylamino-2-methylcyclohexanecarboxylic acid	[M+Na]+			Organic acids and derivatives	Carboxylic acids and derivatives	Carboxylic acids	60143.2	114156	84119.9	135725	140743	118670	111527	100653	123819	63661.5	133198	122961	129087	45871	121030	112354	117503	40019.9	74369.6	86549.6	115455	41356.4	86218.7	70856.5	116887	117621	117031	116129
M333T139	333.262	139.095	Cis-4,10,13,16-docosatetraenoic acid	[M+H]+			Lipids and lipid-like molecules	Fatty Acyls	Fatty acids and conjugates	283522	141229	152310	202199	174815	205523	305461	449454	177710	242984	83374.3	57094.9	221030	205426	139269	228075	271897	228504	266871	192461	265358	155585	187047	198317	239494	258840	243265	239431
M342T441	342.138	441.367	Clethodim	[M+H-H2O]+		C18609	Organic oxygen compounds	Organooxygen compounds	Carbonyl compounds	132718	138980	75608.4	63184	78458.6	41721.2	54933.5	97260.1	33285.1	69521.7	59112.9	77109.4	115274	155199	43441.9	78664.3	196172	112998	119645	193504	105356	63885.9	122523	105241	110602	110004	104768	110901
M406T378	406.198	378.18	Clomiphene	[M+H]+		C06917				41159.2	13254.2	37715.7	25872.3	55850	48840.6	47056.7	51302.9	22866.7	28035.7	21449.6	37845.7	47250.3	45558.3	22391.5	44789.5	41721	34355.6	88721.8	35423	126471	30939.4	45700.3	35639.3	45703.2	49572	45697.2	45652.8
M270T64	270.078	63.938	Clozapine	[M+H-C3H7N]+	HMDB0014507	C06924	Organoheterocyclic compounds	Benzodiazepines	Dibenzodiazepines	153560	123975	129273	176955	107246	145294	134650	134221	132094	150436	150542	86967.9	134354	192532	79719.8	130124	148060	128876	168121	74909.6	166124	165610	147075	82876.3	143128	143132	150183	143093
M396T292	396.211	291.688	Cnicin	[M+NH4]+		C09362	Lipids and lipid-like molecules	Prenol lipids	Terpene lactones	34050.5	20194.7	48791	54809.7	43913.7	43657.1	53332.2	42449.3	39140	43118.9	40803.4	41217.6	40195	92554.3	48400.3	44459.4	82519.2	69496.3	52623.2	48451.1	39086.3	46059.3	52975.6	46663	100198	100653	107126	114672
M300T403	300.143	402.605	Codeine	[M+H]+	HMDB0004995	C06174				60268.2	118347	112785	133368	138989	126441	118571	87820.2	123726	73598.4	128274	106940	109153	66091.9	103547	98736.3	99387.7	52612	91694.1	65049.4	96048.8	66461.1	86754.8	68310.6	94864.6	94386.4	95307.3	94736.1
M400T296	400.182	295.534	Colchicine	[M+H]+	HMDB0015466	C07592	Hydrocarbon derivatives	Tropones		39438	25985.9	30137.1	37350.2	55719.6	43291.2	45424.3	38718.5	29378.9	22138.9	29007.5	30251.6	15481.7	57251.6	55203.6	40785.2	77383.2	72780.1	85391.1	37082.2	30603.5	37446.1	42554.2	27776.9	72731.9	93354.4	88222	79133.7
M317T199_2	317.157	199.496	Combrestatin a4	[M+H]+		C20268				117682	55411.4	83196.4	166505	72852.6	40977	219884	83893.8	84635.3	82641.1	85916.7	175335	111746	99432.8	100463	81686.5	130418	293980	131303	180316	52850.8	119324	171186	84392.5	240159	234954	222111	222405
M450T297	450.293	296.82	Condelphine	[M+H]+		C08671	Lipids and lipid-like molecules	Prenol lipids	Diterpenoids	55003.6	94057.4	45868.8	146636	37470.1	45034.9	76623.8	52860.3	50953.9	37443.7	85768.6	39871.8	83348.6	110065	63751.5	87447.9	101174	114875	89264.9	67661.1	44790.2	90636.7	65194.4	57004.1	169656	159054	174272	177481
M769T300	769.409	299.519	Coprogen	[M+H]+			Organic acids and derivatives	Carboxylic acids and derivatives	Amino acids, peptides, and analogues	13906.7	14758.6	15385.9	29295.9	17238.9	20615.4	16364	16186.2	11839.5	15517.1	11537.8	14216	13428.5	15500	10918.4	19166.3	17690	28265.9	19702.3	15634.1	14954.7	14125	22034.1	12054.9	24928.9	24909.4	24225.7	21373.2
M655T393	655.274	392.914	Coproporphyrin I	[M+H]+	HMDB0000643	C05769	Organoheterocyclic compounds	Tetrapyrroles and derivatives	Porphyrins	27368.3	44753.2	45574	50430.1	25619.3	42905.3	43969	43138.2	28036.7	40237.1	27574.7	31054.2	31632.8	52781.5	27817.8	40920.9	40802.8	65744.5	90803.1	25031.5	30330.7	43396.9	39073.3	35303.7	48675.8	42349	40477.8	40099.5
M328T142	328.138	142.457	Coproporphyrin iii	[M+2H]2+	HMDB0000570	C05770	Organoheterocyclic compounds	Tetrapyrroles and derivatives	Porphyrins	474099	324412	462300	439123	493305	366761	311154	289769	417903	249388	435865	335538	369313	481118	386669	348766	385620	368979	573345	318237	289994	455055	537133	295751	490650	477575	449564	490363
M269T341	269.113	341.094	Cordycepin	[M+NH4]+		C08431	Nucleosides, nucleotides, and analogues	Purine nucleosides	Purine 3'-deoxyribonucleosides	346842	263867	369997	397515	350747	316389	360926	357324	324566	332229	281834	271376	366158	364228	312366	351164	391104	368189	410241	288461	390730	323972	373177	309803	407488	423028	423592	417362
M251T199	251.147	198.7	Corey pg-lactone diol	[M+H-H2O]+	HMDB0240213		Lipids and lipid-like molecules	Fatty Acyls	Fatty alcohols	30361.3	49146.7	33848	47893.5	23840	23986.4	49703.6	40752.3	39727	27235	20290.9	47232.2	41484.8	44536.9	22022.9	44894.5	48459	83273.6	57150.7	34883.3	24968.6	53133.5	46193.1	21893.8	70935	65134.9	69947.6	70937.4
M361T198	361.182	197.599	Cortisone	[M+H]+	HMDB0002802	C00762	Lipids and lipid-like molecules	Steroids and steroid derivatives	Hydroxysteroids	105377	71179.2	129798	138425	81996.4	115069	134723	51124	67677.4	88362.7	41338.6	122552	34172.2	134453	102551	132380	216129	209177	150050	104574	54931.5	99313	98127.4	83082.5	203737	229272	222308	238266
M370T415	370.195	415.401	Corydaline	[M+H]+		C15530				40852.8	35295.8	26960.3	60284.5	60740.1	54338.9	26702.1	17562.5	53067.5	20938.3	30504.4	46142.6	28003.8	94531.5	66299.4	35747.4	56642.1	53916.1	62458.4	42850	48318	51994.8	81913.8	42393.8	37462	38539.4	37429.2	41815.6
M303T419	303.118	419.298	Corylin	[M+H-H2O]+			Phenylpropanoids and polyketides	Isoflavonoids	Pyranoisoflavonoids	17013.5	11224.9	3783.19	6520.84	12515.7	8156.27	14218	19911	5736.25	66132.8	10481.1	18918.4	19627.6	13985.3	8651.45	4450.7	4423.31	38067.1	18409.1	6610	15116.5	253616	6651.37	19003.8	19567.6	16047.1	17020.1	18196.6
M368T204	368.129	204.215	Corynoline	[M+H]+			Alkaloids and derivatives	Benzophenanthridine alkaloids	Hexahydrobenzophenanthridine alkaloids	13417.5	4292.42	13052.8	9927.76	6057.92	11647.8	10334.1	6455.98	6225.98	10296	14214.1	10192	9414.1	9421.04	11140.1	12062	12503.4	15415.1	9203.71	13892.8	14675.6	8148.06	10464.2	9119.78	16125.2	15140	12857.2	14656.6
M233T37_1	233.153	37.069	Costunolide	[M+H]+		C09382	Lipids and lipid-like molecules	Prenol lipids	Terpene lactones	154514	57183.8	100286	224164	169317	49451.1	38713.2	12526.4	61634.6	238276	103097	38738.2	97013.8	293400	64764.4	66769	62050.6	409156	167182	81639.7	37819.3	181088	215009	364293	161558	158124	158118	158126
M621T139	621.378	138.669	Crassostreaxanthin b	[M+Na]+			Lipids and lipid-like molecules	Prenol lipids	Sesterterpenoids	88612.9	69575.2	84485.4	92147.7	101492	61676.2	54645	69974.5	54055.5	58613.5	82105.5	117240	66835	74967.2	113631	76824.5	71107.6	87711.1	90539.5	90099.7	62024.1	73001.6	65395.6	82824.4	75672.4	75873.7	63761.9	75850.2
M132T338_2	132.076	338.397	Creatine	[M+H]+	HMDB0000064	C00300	Organic acids and derivatives	Carboxylic acids and derivatives	Amino acids, peptides, and analogues	46565	363431	186217	86733.3	55789.7	258840	160866	78046.2	102607	686633	133631	543955	48207.6	436941	292292	393331	172399	776374	232147	426848	73157.4	247819	348826	507375	314843	319396	317361	309293
M114T163	114.065	162.79	Creatinine	[M+H]+	HMDB0000562	C00791	Organic acids and derivatives	Carboxylic acids and derivatives	Amino acids, peptides, and analogues	137184	331155	171940	197431	196878	306629	327860	217447	127510	764775	202553	370196	122454	338242	244971	186578	183432	286296	539720	391717	208880	639308	277056	619788	323200	326393	326388	325401
M198T46	198.043	46.2515	Creatinol o-phosphate	[M+H]+			Organic acids and derivatives	Organic phosphoric acids and derivatives	Phosphate esters	1085.55	3418.36	1496.76	584.04	1701.18	2064.98	331.502	951.679	1717.23	1337.82	1838.21	21056.4	2746.97	1202.13	34369.8	447.49	1731.22	1636.9	1335.5	56844.5	2319.08	776.352	1022.51	1993.1	798.667	708.407	802.98	1329.88
M581T210	581.312	210.359	Cucurbitacin b	[M+Na]+		C08794	Lipids and lipid-like molecules	Steroids and steroid derivatives	Cucurbitacins	16881.8	16223	21710.8	56693.4	24371.6	22663.4	33916.5	26433.7	23512.4	23421.5	20555.4	28051.6	24388	30036.2	29407.2	27479.1	32290	39813.7	39101.5	30601.3	23218	26539.3	29122.6	27590.7	32656	34893.9	36300.7	36342.1
M481T275	481.27	275.335	Cucurbitacin d	[M+H-2H2O]+		C08796	Lipids and lipid-like molecules	Steroids and steroid derivatives	Cucurbitacins	18753.8	34050.5	12393.2	27112.4	37090.5	38345.4	50726.9	42425.1	40890.9	31691.1	39236.3	41397.4	30550.4	35853.5	42533.7	39652.8	52671.7	61958.7	18606.2	50203	37069.2	39619.2	58724.6	39593.4	48347.5	54393.7	51813.9	48610.9
M497T225_3	497.31	225.102	Cucurbitacin i	[M+H-H2O]+		C08800	Lipids and lipid-like molecules	Steroids and steroid derivatives	Cucurbitacins	597851	825121	623350	674364	625617	577244	463163	314408	770974	571785	686331	628323	33628.2	660777	773407	67444	574454	306021	460339	667718	65399.9	510385	651667	537414	325191	311167	325325	321446
M226T271	226.082	271.101	Cyclocytidine	[M+H]+			Organic oxygen compounds	Organooxygen compounds	Ethers	37777.9	27666.6	37689.3	48688.7	28058.6	39338.6	37004	37755.7	41572.2	34639	36613.3	39346	29819.2	41129.4	43746.3	40057.3	37656	41247.4	53977	41619.3	39600.5	34707.6	49931.8	36888.4	41499	43652.4	43678.7	43683.5
M264T352	264.158	351.99	Cycloheximide	[M+H-H2O]+		C06685	Organoheterocyclic compounds	Pyridines and derivatives	Hydropyridines	38931.8	34102	28508.2	35072.6	29763.3	28405	19460.9	16630.2	28665.1	14098.9	33042.6	31012.3	21227.3	44694.5	38549	28615.2	31905.6	32278.4	60332.2	27880.1	37667.5	27005.2	32088.8	16920.9	32560.6	33043.3	30924.4	33033.8
M160T419_2	160.132	419.055	Cyclohexylamine	(M+CH3COO+2H)+	HMDB0031404	C00571	Organic nitrogen compounds	Organonitrogen compounds	Cyclohexylamines	25236.9	45846.2	46223.8	21061.1	47921.7	27435.8	28706.7	19479.3	45353.4	24021.1	21038.8	21001.6	32084.9	22475.9	55198.4	47184.7	48517.1	23997.9	19587.5	39263.7	22488.6	16249.3	43022.5	28897.3	41216.3	36745.8	37874.2	36752.3
M412T278	412.302	278.092	Cyclopamine	[M+H]+		C10798	Lipids and lipid-like molecules	Steroids and steroid derivatives	Steroidal alkaloids	9091.29	14101.8	11528.2	16558.4	15553.7	15140.4	43169.3	10042.2	11167.1	2906.55	15762.4	15312	11515.4	6865.96	13346	10347.4	7921.26	8290.19	8201.12	3822.24	13628.9	10752.1	9587.56	12420.9	17588.8	18410.8	17384	18418.7
M425T281	425.226	280.561	Cyclopentaneheptanoic acid, 2-[(3r)-4-[(2-fluorophenyl)thio]-3-hydroxybutyl]-3,5-dihydroxy-, methyl ester, (1r,2r,3r,5s)-	[M+H-H2O]+			Lipids and lipid-like molecules	Fatty Acyls	Eicosanoids	27024.3	22558.6	40285.6	28239.9	49955.4	25764.8	52230.3	23339.6	26010.5	39178.5	32823	36897.3	41475.9	56076.9	31700.6	29749.2	42368	63046.1	46607.6	31448.9	35190.2	55077.1	47997	16183.9	62801.4	63311.5	63485.6	61226.8
M274T220	274.174	220.494	Cyclopentolate	[M+H-H2O]+	HMDB0015114	C06932				18640.8	28458.8	20801.3	21283	8860.4	27243.3	33494.1	15240.8	28553.9	20220.8	21298.6	30118.8	14807.1	23112.3	27622.1	21883.2	27820.2	41008.9	15839.3	43021.4	30335.7	30028.7	21319.2	19184.3	22695.3	21187.6	21742.5	20877.7
M549T159_2	549.321	159.449	Cymarin	[M+H]+		C08859	Lipids and lipid-like molecules	Steroids and steroid derivatives	Steroid lactones	57555	59713.3	55431.1	95169.7	55077.5	38611.5	71360.2	49001.7	46497.8	30480	76136.7	44208.2	49412.9	53638.9	96744	47366.5	145672	69641.5	75089.5	38743.1	50170.2	40900.7	103932	34897.9	69489.3	80516.5	64977.7	64677.8
M517T322	517.141	322.154	Cynarin	[M+H]+	HMDB0030093	C10445	Organic oxygen compounds	Organooxygen compounds	Alcohols and polyols	11195.3	6864.64	9705.39	25714.2	8122.44	5227.64	11273.9	7395.05	17071	6184.53	13512.9	6240.92	11689.6	68264.8	5830.57	6694.72	11990.3	6542.15	73967.4	18681	11244.2	13219.5	10793.8	31150	15934.5	13823.7	14200.2	13794.3
M376T333	376.194	332.678	Cyphenothrin	[M+H]+		C12962	Lipids and lipid-like molecules	Fatty Acyls	Fatty acid esters	26345	42557.3	39157.4	40439.7	16547	25375.5	30323.6	40228	34306.6	34311.1	38963.6	38966.9	31143.5	47381.3	27195.1	26788.7	49794.9	26200.7	24191.4	52698.7	25429.5	30721.7	18845.7	37666.9	39237.5	38425.7	38380.6	34655
M292T185_2	292.132	185.333	Cyproconazole	[M+H]+		C18456				63248.2	70630.9	53516.5	110807	67223.3	58185.4	48481.1	57424.1	76049.7	75889.8	67133.5	69431.2	64492.4	69920.6	84708.9	68080	69686.4	120200	149460	66607.3	58531.9	65385	117935	44685.2	65657	68609.4	65642.8	65619.8
M226T186	226.121	186.091	Cyprodinil	[M+H]+	HMDB0034853	C10914	Benzenoids	Benzene and substituted derivatives	Aniline and substituted anilines	93052	138984	105951	109081	83539.6	91242.2	98853.9	86821.5	90623.3	101445	95617.8	127750	80722.4	121956	127210	78700.9	79476.1	88073.6	121210	68370.5	79641.3	108459	115923	44329.5	121784	133571	125701	128880
M417T291	417.18	290.541	Cyproterone acetate	[M+H]+			Lipids and lipid-like molecules	Steroids and steroid derivatives	Pregnane steroids	31340.7	27174.7	13598.6	37169.5	30588.2	29016.6	34859.5	31377	26644.5	22168.7	28843.8	28215.3	28578.2	34517.1	10612.2	31273.4	25063.1	39316.2	36330.3	14547.3	30199.4	33546.8	13063.8	10749	32398.6	38689.4	35193.1	32281.7
M167T50	167.106	49.843	Cyromazine	[M+H]+	HMDB0029862	C14147	Organoheterocyclic compounds	Triazines	Aminotriazines	3.50555e+06	828568	2.90149e+06	4.13493e+06	2.24252e+06	3.13852e+06	3.99191e+06	4.41203e+06	728150	1.94587e+06	3.42197e+06	658108	3.74676e+06	3.48465e+06	834498	3.06063e+06	3.41733e+06	4.28876e+06	4.42233e+06	679459	3.9109e+06	2.95769e+06	2.98935e+06	3.45021e+06	3.74476e+06	3.82688e+06	3.72066e+06	3.72002e+06
M415T422	415.191	422.426	Cys-His-Arg	[M+H]+			Organic acids and derivatives	Carboxylic acids and derivatives	Amino acids, peptides, and analogues	39356.4	24024.7	37443.8	51789	37017.1	36516.2	31411.9	40635.5	35424.7	42027.9	37122.2	20189.2	34871.4	51070.1	18525.9	37211.6	48347.3	54039.3	53210.5	40988.3	30661.5	45264.3	45477.6	43751.3	46428	47520.8	46147.9	45362.5
M347T383	347.194	382.603	Cys-Pro-Lys	[M+H]+			Organic acids and derivatives	Carboxylic acids and derivatives	Amino acids, peptides, and analogues	36149.6	24356.8	28105.8	25981.6	31041.8	34981.8	29553.3	57550.3	48281	34165.1	45754.3	29413.3	25151.6	43770.6	24122.6	16643.4	36258.2	88095.5	38919.5	72612	20198.3	57343.3	58245.2	75054.4	16719.4	19114	19571.5	27715.4
M518T378	518.307	378.499	Cysteine conjugated chenodeoxycholic acid	[M+Na]+			Lipids and lipid-like molecules	Steroids and steroid derivatives	Bile acids, alcohols and derivatives	18170.1	15790.2	15409.9	13600.2	15692	14322.4	19549.8	12311.9	13338	9301.85	16351.6	10194.9	12666.6	24456.1	17064.3	3572.25	6542.1	12127.7	7854.32	16015.2	14673.6	14357.3	13009.8	14057.2	13690.4	11933.9	13837.7	13179.7
M112T184_2	112.05	184.204	Cytidine	[M+H-C5H8O4]+	HMDB0000089	C00475	Nucleosides, nucleotides, and analogues	Pyrimidine nucleosides		270163	151180	147427	511283	164972	179571	203006	252260	39386.2	112745	117272	125112	219988	358488	95813.8	98359.6	163073	344329	443386	613585	159970	268911	402836	666788	282543	285374	282637	302517
M500T411	500.239	410.613	Cytochalasin a	[M+Na]+		C19953	Alkaloids and derivatives	Cytochalasans	Cytochalasins	23216.5	43077	18826.1	50214	40595.9	28840.7	48540.9	47782.5	42309.2	36700.7	46193.5	41074.2	28233.9	44083.1	25025.4	44608.3	47929.8	54812.7	63607.3	38273.4	45345.7	60688.3	55541.6	29658.9	58110.2	58759.2	58772.9	56032.8
M462T292	462.284	291.568	Cytochalasin b	[M+H-H2O]+		C19954	Alkaloids and derivatives	Cytochalasans	Cytochalasins	25070.5	12156.7	26038.1	34064.1	28434.3	30595	22163.8	26514.1	20736.6	20382.6	32777.8	24643.1	25086.6	34886.2	32810.7	28439.7	33620.2	36434.9	30395.7	32468.1	30084.5	23959.8	32153.3	27347.3	40166.4	40207.8	40338.8	42815.9
M434T365	434.25	365.482	Cytochalasin e	[M+H-CH2O3]+						52438.5	40778.2	42947.9	47783.7	44293.1	31490.5	33518.5	35641.7	31033	32529.1	42247.3	34574.5	40712.2	40732.2	41174.3	38473.6	43204.5	40288	46390.2	33051.9	34486.4	37772.7	41096.1	49250.9	44993	47060.6	45375.1	44990.6
M516T365	516.266	365.165	Cytochalasin h	[M+Na]+						15713.4	13814	25666.8	26442.6	53492.4	22952.6	12481.8	10242.7	18001.1	22244.1	18003.9	17036.5	15929.3	19382.2	21870.3	18101.8	26288.8	48300.6	23554.3	16822.3	17544.6	24674.1	11015.3	23121.2	32411.2	28530	24028.3	30638.4
M434T242	434.251	241.534	Cytochalasin j	[M+H-H2O]+			Organoheterocyclic compounds	Isoindoles and derivatives	Isoindoles	26852.2	27986.7	19465.6	24279.3	18391	20319.9	23305.3	10861	25577.8	24944	5175.96	15530.1	30940.3	25069	17460.6	22648.8	42807.1	39307.3	26541.1	23304.4	24385.1	42094.9	20862.9	14886.5	33574.6	36194.4	37771.3	37343.7
M112T64	112.05	64.325	Cytosine	(M+H)+	HMDB0000630	C00380	Organoheterocyclic compounds	Diazines	Pyrimidines and pyrimidine derivatives	166074	217704	139565	68105.9	28766.4	109252	132160	74450.8	119796	147752	26877.5	32423.6	23528.6	26905.7	26045.6	66709.3	27363.8	16657.7	31212.5	28103.2	31033.4	24651.2	40858	37389.8	57433.4	57989.7	74440	57494
M111T71	111.055	70.5975	D-erythro-imidazolylglycerol phosphate	[M+H-CH5O5P]+		C04666	Organic acids and derivatives	Organic phosphoric acids and derivatives	Phosphate esters	450375	363690	439154	758207	377461	444255	459819	627829	426109	503363	445712	322468	451049	764378	296384	431647	475619	592402	725037	425354	494329	685566	492538	627604	559667	555607	544795	560827
M362T251_2	362.24	250.51	D-erythro-sphingosine-1-phosphate	[M+H-H2O]+	HMDB0000277	C06124	Lipids and lipid-like molecules	Sphingolipids	Phosphosphingolipids	57231.4	61081.8	77458.6	13705.7	51052.3	72660.6	76516.9	51303.8	75386.5	42688.3	54887.7	61613.3	71151.5	16495.7	63305.5	54838.2	41107	72359.9	31494.8	58981.3	45744.7	38136	53113.5	22324.3	66264.8	67898.8	70223.9	66191.1
M196T97	196.06	96.546	D-glucosaminic acid	[M+H]+		C03752	Organic acids and derivatives	Carboxylic acids and derivatives	Amino acids, peptides, and analogues	208008	206450	206186	218643	181367	69515.2	37158.2	72404.8	108472	116346	136227	168536	70033.8	9829.8	158453	163146	101031	195423	219615	138186	106346	152382	77846.3	55869.8	105325	111494	102444	102550
M147T366	147.076	365.978	D-glutamine	[M+H]+	HMDB0003423	C00064	Organic acids and derivatives	Carboxylic acids and derivatives	Amino acids, peptides, and analogues	44274.3	73579.2	46574.4	27370.9	64667.7	77941.4	54900.9	49833.1	33386.8	71511	47508.7	74452.6	31604.9	78702.6	49636.2	42496	41212.5	97521.3	43728.4	75422.3	57487.2	67626.9	58451.4	43411.5	74190.7	87239.3	74255.9	74260.5
M606T177	606.4	177.317	D-lactosyl-.beta.1-1'-d-erythro-sphingosine	[M+H-H2O]+			Lipids and lipid-like molecules	Sphingolipids	Glycosphingolipids	16142.9	12548.3	14663.4	16548.4	16641.6	12505.6	10790.6	14903.4	19710.8	15045.7	18884.5	26746.3	18000.9	34933	18793	17872.9	27204.7	16046.3	22615.5	28875.3	22843.4	25368.2	17655.9	18939.6	13365.4	14272	13817.5	13084.4
M498T235	498.277	235.212	D-leucinamide, n-[(phenylmethoxy)carbonyl]-l-leucyl-n-[(1s)-1-formyl-3-methylbutyl]-	[M+Na]+			Organic acids and derivatives	Carboxylic acids and derivatives	Amino acids, peptides, and analogues	20405.4	25749.9	21817.4	32294.9	9242.43	25427.6	20996	8951.53	22555.6	21616.7	25038.3	21583.5	9603.42	24641.9	26405.1	11341.2	16987.4	13486.1	28822.5	31208	11507	16910.1	26087.7	25800.2	19364.1	19132.6	19136.3	20306
M341T235	340.987	234.891	D-myo-inositol-1,4-diphosphate	[M+H]+	HMDB0000968	C01220	Organic oxygen compounds	Organooxygen compounds	Alcohols and polyols	15275.4	10860.1	11393.6	5345.17	16615.4	9211.16	1096.16	14323	20072.5	9183.85	11163.3	5001.8	13185.4	7557.03	5258.53	6799.07	8313.8	887.907	4100.83	4256.62	13322.1	13001.8	5895	8317.81	936.319	966.218	899.77	877.514
M174T112	174.122	111.656	D-Ornithine	(M+CH3CN+H)+	HMDB0003374	C00515	Organic acids and derivatives	Carboxylic acids and derivatives	"Amino acids, peptides, and analogues"	36779.5	30008.3	20274.5	24269.7	26567.6	203519	27515.9	25049.6	16248.1	31968.9	23348.1	15236.5	39961.8	30798.9	1394.1	37656.9	33135.9	32750.5	41387	25731.2	75178.2	54938.5	25909.7	59679.1	28382.2	28423.4	21441.3	28338.7
M147T545	147.112	545.376	D-Pipecolinic acid	(M+NH4)+						121147	140699	108633	108291	116439	149393	152429	126887	147987	152466	153926	156499	133008	119517	137130	120635	105948	298851	109991	155390	143470	97457.1	126340	102263	338131	337969	317643	333072
M195T73	195.024	72.671	D-Ribose	(M-H+2Na)+	HMDB0000283	C00121/C21057	Organic oxygen compounds	Organooxygen compounds	Carbohydrates and carbohydrate conjugates	2184.59	5508.29	7059.58	1604.73	9674.56	4282.69	754.563	4039.26	4528.94	2823.68	1660.3	283354	5911.87	3711.59	278516	4950.41	3608.55	410.526	1531.8	288770	6857.82	2437.56	4526.93	6004.29	664.047	709.857	402.771	607.849
M255T360	255.061	359.586	Daidzein	[M+H]+	HMDB0003312	C10208	Phenylpropanoids and polyketides	Isoflavonoids	Isoflav-2-enes	5465.95	3168.48	10422.4	13047	188847	8906.25	10908.6	7574.64	164851	11621	4505.94	7440.62	12980.2	7614.18	9107.15	9022.27	9924.21	10784.1	11428.5	5076.53	7479.78	11886.1	7737.69	5348.64	11242.4	11215.9	11928.1	10582.2
M338T255	338.231	255.467	Danazol	[M+H]+	HMDB0002835	C06938	Lipids and lipid-like molecules	Steroids and steroid derivatives	Estrane steroids	54962.4	59688.5	47401.9	69461.2	44918.8	60114.6	83671.3	48090.2	53719.3	43521.6	61095.8	70507.8	60065.2	27538.9	68286.3	56401.4	57086.8	35292.6	63612.3	63928.9	55609.3	31613.4	59009.3	49188.5	93605.1	99555	96132.3	93507.1
M497T403	497.145	402.926	Dapsone	[2M+H]+	HMDB0014395	C07666	Benzenoids	Benzene and substituted derivatives	Benzenesulfonyl compounds	23629.3	43832.2	53742.5	24885.2	38900.6	59558.9	36386.8	37058.1	34455.3	99131.9	30955.1	151052	40837.8	22212.7	34967.2	42902.6	32501.6	22851.9	45444	18200.2	55163.2	54014.8	81438.6	64950.1	28817	30176.1	29711.1	30081.3
M625T226	625.32	226.128	Dauricine	[M+H]+		C09419	Organoheterocyclic compounds	Isoquinolines and derivatives	Benzylisoquinolines	27984.4	33219	23617.8	52502.5	35472.1	34649.2	30490.1	35213.8	42485.5	30959.5	39460.8	42170.7	32696.4	44055.8	41604.1	41958.9	45222.5	38897.9	50724.7	38778.4	35007.5	40199.4	38202.1	66351.9	43717	40156.4	40167.1	41318
M176T157	176.143	156.618	Debrisoquin	[M+H]+	HMDB0006543	C13650				81977.5	80096.6	54223.4	84359.9	25506.1	27368.5	72552.7	47205.9	50117.6	64820.5	75598.8	74132.4	50470.7	92240.5	25880.9	29372.2	18619.8	77865.5	93419.9	30854.3	48078.5	90867.2	50063.4	35421.5	56679.2	67501.6	71254.5	71097.1
M661T414	661.357	413.825	Decahydrogambogic acid	[M+Na]+			Organoheterocyclic compounds	Benzopyrans	1-benzopyrans	16308.7	16174.4	16216.8	6391.62	16089.1	16694.4	11097.6	33423.8	12140.5	19888.5	14131.5	14220.4	15255.2	18008.8	17032.8	14327	18143.6	29540.3	11157.8	29557.1	17554.7	26329.3	21334.8	48227.9	13254.2	17117.6	13211.1	14173.6
M366T222	366.171	222.393	Dehydrocorydaline	[M]+		C17790				56177.1	45296.6	40768.1	55157.7	45305	59219.5	43444.5	34104.7	59120	41810.3	64931.2	50694.2	54691.5	49400.7	47768	51830.9	57756.2	58033.8	57685.6	51110.5	66916.1	57639.5	61436.2	42419.2	70856.2	64322.6	64316.7	80070.9
M468T297	468.304	297.385	Delsoline	[M+H]+		C08678	Lipids and lipid-like molecules	Prenol lipids	Diterpenoids	96734.3	174955	143398	148812	91993.2	85249.8	93771.3	163029	156740	83067.5	58332.9	106335	123963	126772	95824.1	166964	107631	185081	186932	122655	66352.1	97390.4	103034	82014.1	213738	221255	221262	220923
M400T54_2	400.376	54.1435	Demissidine	[M+H]+						107380	98142.9	96792	94663.7	110215	97319.6	104363	95018.3	115066	101730	112645	74036.2	96086.3	105463	81184.9	88950.6	91691.2	88931.5	90888.4	91389.2	114622	100333	110590	119415	121749	125841	125876	125897
M252T128	252.109	128.023	Deoxyadenosine	[M+H]+	HMDB0000101	C00559	Nucleosides, nucleotides, and analogues	Purine nucleosides	Purine 2'-deoxyribonucleosides	1.96083e+06	2.51843e+06	1.26795e+06	2.29441e+06	2.34246e+06	2.5165e+06	560779	1.17364e+06	1.36739e+06	1.9397e+06	1.80076e+06	1.02165e+06	943364	1.50276e+06	766746	664564	1.7661e+06	831473	1.13906e+06	1.82829e+06	562654	3.00452e+06	2.48508e+06	2.39752e+06	1.86278e+06	1.94365e+06	1.77031e+06	1.95817e+06
M228T111	228.1	111.149	Deoxycytidine	(M+H)+	HMDB0000014	C00881	Nucleosides, nucleotides, and analogues	Pyrimidine nucleosides	Pyrimidine 2'-deoxyribonucleosides	140790	109872	204483	211371	115743	429480	201474	176705	98754.1	253673	159025	169270	142888	219437	160109	177124	99492.3	121410	188736	189222	190689	326837	130564	201387	188799	199173	176952	196717
M497T272	497.19	272.436	Deoxypumiloside	[M+H]+		C16725	Organic oxygen compounds	Organooxygen compounds	Carbohydrates and carbohydrate conjugates	20817	12326.1	6885.83	22994.2	24084.5	22780.7	18951	11030.9	22048.5	5629.07	21432.4	23273.2	22692.2	22377.1	22836.5	20525.8	26716.6	18785.9	24115.6	17155.8	22899.4	18814.4	20778.4	18480.4	29010.7	29916.5	29629.6	29861.5
M374T167	374.181	166.807	Deoxysappanone b 7,3'-dimethyl ether acetate	[M+NH4]+			Phenylpropanoids and polyketides	Homoisoflavonoids	Homoisoflavans	44842.9	146693	99349.8	79945.4	42950.6	15410.8	79424.3	28518.2	55357.5	17900.7	89126.7	79448.7	49426.7	32206.1	30275.1	30641.6	33327.2	42007.8	41420.5	145296	37237.4	37402	55752.9	26856.1	62484.2	62480.1	62514.9	51890.7
M583T294	583.366	294.044	Desferrioxamine	[M+Na]+	HMDB0014884	C06940	Organic acids and derivatives	Carboxylic acids and derivatives	Carboxylic acid derivatives	34033.8	29225.8	19258.3	35163.6	30229.3	26656.1	34878.4	39157.5	27733.2	27962.5	20833	23952.4	11335.1	32118.5	17529.4	40064.3	33433.5	82111.1	50063.7	51488.4	21119.9	31860.1	24921.2	36776.1	50245.3	49629.9	49647.3	52009.4
M609T188	609.343	188.201	Desferrioxamine d2	[M+Na]+						51024.8	25733.9	39166.8	62682.1	26833.8	39435	35175.4	35343.5	31269.5	23693.9	34295.3	37995.8	32775.3	36695.4	33403.9	24387	55634.1	67828.5	42649.2	43062.2	24044.1	46065.8	42356.4	29599.1	48732	51636.4	48723.7	48728.1
M231T163	231.16	162.805	Desipramine	(M+H-2H2O)+	HMDB0015282	C06943	Organoheterocyclic compounds	Benzazepines	Dibenzazepines	4506.06	5715.29	1741.65	2365.23	3146.74	4755.97	4441.06	3648.68	2963.53	2957.38	3831.45	2184.79	4164.27	4186.63	3424.7	3923.76	4291.14	9386.13	4815.55	4525.8	3685.22	4646.7	4594.22	4915.3	5841.02	6392.23	5837.86	5913.71
M428T280	428.206	279.869	Desmethylcerivastatin	[M+H-H2O]+			Organoheterocyclic compounds	Pyridines and derivatives	Phenylpyridines	38628.8	38164.1	40537.5	49795	19020.1	37555.9	43773.8	17635.5	35185.2	36741.3	18692	38113.8	26751.8	49150.4	52915.4	49084.5	43564.8	44480.1	57604.4	42610.4	10441.2	38373.9	19749	24774.9	30400.6	33916.2	30645	40832.2
M311T344	311.146	344.257	Desmethylcitalopram	[M+H]+	HMDB0014021	C16608	Benzenoids	Benzene and substituted derivatives	Phenylbutylamines	27177.4	8783.18	24184.6	25854.6	6726.91	11372.1	13939	26034.3	14833.8	23935.2	11705.1	14912.7	16516.2	36359.6	14944.3	21008.4	37173.1	38551.6	32919.8	19753	12787	29692.6	32743.8	22780.1	25033.3	24650.6	22655.7	22699.3
M293T236	293.222	235.764	Desogestrel	[M+H-H2O]+	HMDB0014449	C07629	Lipids and lipid-like molecules	Steroids and steroid derivatives	Estrane steroids	57459.1	75585.4	72139.6	88830	70922.1	86091	81624.6	86306.3	48194.1	33897.2	80293.8	113022	79243.1	73095.4	67869.4	68714	87391.6	66034.6	120113	31389.5	75063.4	79500.8	48884.6	71552.9	82291.4	79155.3	87905.1	75521.2
M206T85	206.116	84.906	Dexpanthenol	[M+H]+	HMDB0004231	C05944	Lipids and lipid-like molecules	Fatty Acyls	Fatty amides	88223.6	79893.1	60270.5	55797.5	62396.2	97901.9	111482	134469	221745	44420.7	113724	48074.6	89184.6	110567	39435	65341.1	60005	128617	144038	66005.7	73058.2	137778	78501.8	93311.5	105881	107017	105872	109214
M147T155	147.079	155.171	Dextromethorphan	[M+H-C8H15N]+		C06947				25313.7	33211	37028.3	23024.2	26976.9	5990.38	33805.9	21970.6	41340	29026.6	26816.7	25376.3	33256.6	26257.7	24771.3	29404.2	33141.9	48168.9	33059.8	16564.1	21997.3	20869.1	27472.7	17075.8	47844.9	46259.9	45615.2	55007.4
M373T403	373.205	402.758	Dfplnnh	[M+H-HF]+	HMDB0015364	C15643	Lipids and lipid-like molecules	Steroids and steroid derivatives	Hydroxysteroids	102984	67758.8	80156.9	106321	109580	81351.1	86277.1	83552.3	100628	47855	116519	122169	98342	96433.1	85000.5	74768.3	97555.1	80781.9	89587.7	53722.8	78708.1	58002.8	107546	81940.8	98776.8	99017.8	103134	103244
M449T349	449.171	348.785	Dg-c8-aac	[M+H]+			Nucleosides, nucleotides, and analogues	Purine nucleosides	Purine 2'-deoxyribonucleosides	32965.4	44073.3	31871.4	28742.4	13739.9	46212.7	30858.6	21908.3	27779.6	24219.4	17462.8	141909	23974.5	36184.9	36151.7	18326	35165.2	29535.7	6041.14	25237.2	21194.6	31300	32427.5	21407.9	33571.2	33689	33515.2	38534.2
M419T199	419.324	198.84	Di(2-nonyl) phthalate	[M+H]+			Benzenoids	Benzene and substituted derivatives	Benzoic acids and derivatives	32661.6	32138	20480.6	31663.6	20978.9	25453.9	30242	21564.3	26001.3	24491.2	27748.5	29225	21511.1	30833.6	29070.3	22306.5	22783.2	31158.6	29318.9	26997.7	19640.1	17832.6	28359.4	19977.2	38442.4	38475.8	39791.7	40995.6
M289T272	289.138	272.347	Diacetoxyscirpenol	[M+H-C2H6O3]+		C09662	Lipids and lipid-like molecules	Prenol lipids	Sesquiterpenoids	149379	108382	124547	162020	120725	124728	116530	171374	151872	136264	142502	125972	138806	142655	151707	134257	137751	107956	221852	121839	128437	133063	141954	139561	129423	131769	133040	133043
M280T263	280.103	262.945	Dibenz(a,h)acridine	[M+H]+		C19219	Organoheterocyclic compounds	Quinolines and derivatives	Benzoquinolines	26435.8	30805.6	17560.1	23054.6	19572.2	23749.5	27491.8	35149.3	31205.6	36962.3	34140	18015.5	23540.8	26774.3	25935.8	30490.5	22243.8	9342.51	11181.3	8143.73	33350.5	17800.4	32888.2	11048.6	35825.9	35899.8	22202	36265.3
M344T66	344.226	65.8845	Dibucaine	[M+H]+	HMDB0014668	C07879	Organoheterocyclic compounds	Quinolines and derivatives	Quinolones and derivatives	220984	210805	191484	194310	199390	242518	216254	173703	214716	199688	198950	142529	211797	206997	166884	200084	202302	175052	228849	249251	230060	217771	216383	212998	236252	232995	237566	237562
M555T363	555.197	363.237	Didansyl-1,4-diaminobutane	[M+H]+			Benzenoids	Naphthalenes	Naphthalene sulfonic acids and derivatives	16887.9	13285.2	12439	12382.1	17521	15494.4	18369.9	16141.3	13218.6	13298.4	16342.9	5751.56	19489.4	19562.3	11838	11857	8770.78	16583.3	13264.4	19351.8	14984.3	14777.8	10179.4	14379.4	22624.1	16661.9	16688.9	16615.6
M402T203	402.242	203.056	Didemethylmifepristone	[M+H]+			Lipids and lipid-like molecules	Steroids and steroid derivatives	Oxosteroids	29908	32175.9	49691.2	75092.2	44037.4	30220.9	55115.5	48511.5	53222.3	23982	50526.4	47877.4	49415.8	34718	66781.3	46007.7	60637.6	73344.8	75149.1	34307.3	42508	57528.4	58133.1	24512.7	76336	77888.2	74869.8	75754.1
M228T305_2	228.195	304.62	Diethanolamine	(2M+NH4)+	HMDB0004437	C06772	Organic nitrogen compounds	Organonitrogen compounds	Amines	2406.77	3124.32	3693.5	9935.86	8747.64	11194.8	7890.23	11671.2	14100.9	11907.7	2936.07	8601.28	13476.7	1882.6	2376.51	4535.74	10842.7	3099.79	10873.1	12994.7	3005.64	3049.81	9867.72	9645.28	3643.63	3110.82	3657.95	6025.3
M204T304	204.122	303.841	Diethyl l-glutamate	[M+H]+			Organic acids and derivatives	Carboxylic acids and derivatives	Amino acids, peptides, and analogues	34326.4	39603	61422.4	50065.5	89833.7	55708.9	162171	214461	86159.1	19154.5	26066.9	51692.1	29151.7	37485.1	205997	197622	25598	45297.3	49069.8	34617.7	30828.6	38245.6	38228.1	32117.7	41056.1	38010	43181.1	42196.2
M407T332	407.226	332.255	Difenoxin	[M+H-H2O]+		C07871	Benzenoids	Benzene and substituted derivatives	Diphenylacetonitriles	11691.6	61279	13638.2	35039.6	15397.7	36766.9	29821.4	67772.6	33427.9	16765.6	22223.6	27857.5	14985.4	23059.8	44754.3	21241.4	14036	26721.3	33235.7	30036.3	101728	68689.7	37276.5	16169.3	26640.7	24365.7	24393.6	24390.8
M441T53_2	441.2	53.329	Diferuloyl putrescine	[M+H]+			Phenylpropanoids and polyketides	Cinnamic acids and derivatives	Hydroxycinnamic acids and derivatives	49966.1	55604	67883.3	38239.9	45735.9	112819	38794.8	37440.3	48298	53517	46032.5	41568.5	48212.5	59836.7	38478.2	60689.5	55455.6	55323.9	114217	26724.5	28343.1	85102.7	84446.1	132962	50556.2	52779.5	50493.5	57963.8
M787T375	787.418	374.664	Digitoxin	[M+Na]+	HMDB0015468	C06955	Lipids and lipid-like molecules	Steroids and steroid derivatives	Steroid lactones	10188.7	7277.82	6690.62	13099.1	9400.61	6775.38	6216.07	13140.5	1874.83	10681.4	5948.95	11322.7	5061.05	13413.5	10657	9340.76	13920.3	16453.4	8180.13	31874.1	12842.5	14579.9	30752.9	12548.2	14684.9	14697	10401.7	14277.5
M308T81	308.22	80.628	Dihydrocapsaicin	[M+H]+	HMDB0038457	C16952	Benzenoids	Phenols	Methoxyphenols	264383	223893	205395	295580	372441	397119	253324	181667	279084	239187	227774	146510	259681	168544	286461	150166	80866.6	145539	333266	150194	197033	239869	250862	131163	199733	220906	186955	185140
M277T361	277.118	360.981	Dihydromethysticin	[M+H]+	HMDB0030791	C09926				49665.9	65303	44158.8	69654.1	106381	66343.7	52776.9	31992.5	71809.5	57171.7	56181	69185.2	58325	73613.7	64797.9	51750.4	66041.8	67163	74972.7	19519.1	59419.4	24876.2	57568.3	56838.4	63300.4	59628	62657.1	63294.6
M339T330	339.226	329.502	Dihydrovindolinine	[M+H]+						27139	45156.2	32681.6	44343.8	91121	46139.8	70692.7	35205.2	41401.4	22556.7	44388.8	70862.1	48353.7	42544.8	37634.7	36754.6	71285.5	40056.9	27744.3	27622.3	37021.3	12827.6	25028.3	30196.5	38791.6	35997.1	34804.7	34846.3
M292T183	292.164	183.126	Dikegulac acid	[M+NH4]+		C18825	Organic oxygen compounds	Organooxygen compounds	Ethers	93614.4	82971.5	90071.8	76925.5	93680.8	94554.2	62317.7	67118.6	71988.4	70114.4	83208.9	120573	70409.2	115558	70899.3	100388	75723.5	86157.1	77795.8	87469.1	85169.6	79203.8	95436.8	59574.9	90533.4	90969.9	90748.4	90469.7
M415T401	415.144	400.603	Diltiazem	[M+H]+	HMDB0014487	C06958	Organoheterocyclic compounds	Benzothiazepines		12463	15103.4	10444.6	12055.5	7818.77	15100.1	11532.1	12711.2	14236.6	15174.1	14694.6	10739	14638.6	11784.1	9401.09	16225.3	10738	17119.6	9562.7	7426.85	21807.8	12948.5	11009.4	7596.78	14436	14808.9	16368.8	20025.9
M256T147	256.168	147.467	Dimethametryn	[M+H]+		C18537	Organoheterocyclic compounds	Triazines	1,3,5-triazines	403417	323562	379010	208493	277205	160773	186306	164605	260335	174894	164198	231085	170044	433009	171187	146090	143727	134032	128502	184478	129871	141157	178080	74738.6	262977	260842	296552	295621
M147T214	147.091	214.346	Dimethylbenzimidazole	[M+H]+	HMDB0003701	C03114	Organoheterocyclic compounds	Benzimidazoles		23553.7	31080.2	25730.1	25708.6	16890	21644.9	27130.4	31995.5	14113.7	32637.3	27509.2	30835.2	14178.4	29411.3	25816.5	20002.5	16179	18344.1	23766.2	9207.47	32176.3	30203.8	22959.1	12744.4	26035.2	26043.2	28953.8	26040.1
M529T288_2	529.344	287.697	Dinor-12-oxophytodienoic acid	[2M+H]+			Lipids and lipid-like molecules	Fatty Acyls	Eicosanoids	28690	4103.32	24753.3	23583	34363.8	25602.4	37764.6	15440.2	25877.7	25164.2	2935.97	24417.7	7247.49	42588.7	10357.6	28340.1	17450.3	28780.7	28484.1	25308.2	13805.4	22833.4	20741.3	31116.8	31412.3	33501.6	35584.2	35546.1
M891T173	891.474	173.105	Dioscin	[M+Na]+		C08897	Lipids and lipid-like molecules	Steroids and steroid derivatives	Steroidal glycosides	24983.2	9089.85	18173	23160.2	29128.4	14755.9	11112.4	21722.8	9413.25	21874.9	10672.9	19844.7	17154.9	19758	15170.5	8454.39	16419.1	16081.4	15841.8	18203.9	16394.5	26166.6	37964.6	13202.5	13856.5	14272.4	14270.2	12698.4
M224T289	224.102	289.07	Dioxacarb	[M+H]+		C18953	Benzenoids	Benzene and substituted derivatives	Phenoxy compounds	55011.4	53214.8	37001.7	49704.3	62483.9	59527.1	60199	50988.6	54627.2	27357.8	41080.4	49804.7	40710.5	84359.7	50380.5	24356.2	74123.2	49092.5	47150.8	33601.6	67712.3	93312.5	49968.7	38654.5	78398.7	81507	88477	78409
M453T492_2	453.237	492.007	Diphenoxylate	[M+H]+	HMDB0015213	C07872	Benzenoids	Benzene and substituted derivatives	Diphenylacetonitriles	11238	15327.7	9634.48	28850.5	13447.4	13374.6	14326	17849.3	18969.8	19548.7	16283.6	6616.4	12601.9	16617	19807.2	9818.59	17690.6	11511.4	12888	20885.7	22809.2	21291.1	25660.8	17457.4	19165.8	18302.2	17736.6	17847.6
M170T244	170.117	243.668	Diphenylamine	[M+H]+	HMDB0032562	C11016	Benzenoids	Benzene and substituted derivatives	Aniline and substituted anilines	42393.8	39782	40435.7	47451.4	29727	31473.7	34697.2	34873.8	22075.4	25717.5	39208.1	32791.2	26462.2	40758.4	36897.1	30285.2	24219.5	34256.8	33441.6	22322.2	35275.6	33885.4	41891.6	19036.2	36441.8	36409.2	36427.8	34096.8
M168T442	168.028	442.188	Dipicolinic acid	[M+H]+	HMDB0033161		Organoheterocyclic compounds	Pyridines and derivatives	Pyridinecarboxylic acids and derivatives	53265.6	35248.7	78474.2	4379.87	28846.6	24918.5	41220.6	18598.5	33046.5	18072.5	83842.6	39785.7	66138	33944.1	28871.9	44087.4	41277.7	152113	24908.2	30545.4	57852.4	6812.04	11145.6	29010.8	75333	74364.2	73277.6	74800.6
M352T376	352.211	376.476	Dipivefrine	[M+H]+	HMDB0014592	C06963				35776.9	68011.4	48861.1	77233.7	100648	110787	63024.8	43937.1	68798	32697	132816	78053.6	61834.7	44518	54309.1	37629.2	40606.7	27562.5	52408.3	45701.2	65830.8	62609.9	39483.4	46607.1	57978.3	58867.7	56883.8	58873.6
M505T40_2	505.348	39.8045	Dipyridamole	[M+H]+	HMDB0015110		Organic nitrogen compounds	Organonitrogen compounds	Amines	74635	120222	124706	269992	87827.4	145312	58444.9	111800	63752.4	106618	109435	97090.3	76592.4	115210	161954	67790.1	118807	116059	124135	116787	125082	107330	124772	78644	136650	136369	112406	136703
M341T389	341.205	389.336	Dipyridamole mono-o-.beta.-d-glucuronide	[M+2H]2+			Organic oxygen compounds	Organooxygen compounds	Carbohydrates and carbohydrate conjugates	47413.4	22145.8	16791.5	42367.8	25314.5	58026.7	16964.6	12611.2	19016.4	35057	56034.3	47622.5	23907.3	33037.3	48932.3	52428.3	42806.7	48323.2	32296.5	40898.5	18808	42111.8	17401.6	10358.2	23876.6	22318.1	28318.2	31827.8
M418T323	418.292	322.899	Dirithromycin	[M+2H]2+			Organic oxygen compounds	Organooxygen compounds	Carbohydrates and carbohydrate conjugates	5795.67	7560.87	12624.7	17280.2	14110.2	11065.5	13885.6	7477.07	7287.22	11842.9	10277.3	7998.88	8932.43	10798.1	10894.2	6990.29	9238.1	8706.55	10789.2	8578.33	10997.1	12584.8	10290.5	12344.4	11085.9	12816.9	13148.9	11423.6
M421T205	421.069	204.534	Dithiothreitol, mono(carbamidomethyl), oxidized	[M+H]+			Organic acids and derivatives	Carboxylic acids and derivatives	Carboxylic acid derivatives	7296.49	6836.05	7500.64	15400.9	6410.74	8787.7	2782.98	5395.26	7331.89	11359.9	8429.29	2519.24	15786.4	2757	10346.3	7428.19	2124.48	1483.1	5511.1	1898.07	5151.84	16936.5	7854.69	9148.54	5465.17	2440.72	5955.53	6025.91
M162T380	162.075	379.606	Dl-2-methylglutamic acid	[M+H]+			Organic acids and derivatives	Carboxylic acids and derivatives	Amino acids, peptides, and analogues	34794.5	30942	28904.3	23253.3	13600.6	26875.8	30839.3	44614.9	25508.9	67380.5	22105.3	54314.2	17638.4	47238.9	75689.8	57073.8	37398	53432	73450.8	81579.4	25362.6	43241.9	46722.9	46791.3	46416.9	40729.9	46408.8	45449.2
M146T270	146.08	269.666	DL-3-Hydroxybutyric acid	(M+CH3CN+H)+	HMDB0000011/HMDB0000357	C01089	Organic acids and derivatives	Hydroxy acids and derivatives	Beta hydroxy acids and derivatives	12196	11721.6	13708.5	17072	7417.85	15148.5	6179.38	13215.1	7800.59	14242.6	14869.1	11774.5	12442	13885.8	13056.8	12867	15690.1	12628.6	15767	16968.5	13877	16103.5	15507.1	12215	14706.4	12656.9	14263.8	14675.8
M105T37	105.069	36.731	Dl-a-hydroxybutyric acid	[M+H]+	HMDB0000008	C05984	Organic acids and derivatives	Hydroxy acids and derivatives	Alpha hydroxy acids and derivatives	197226	175711	130298	163114	163176	152734	204578	188405	188658	185018	180063	141557	167248	206271	133006	151074	146925	157031	185730	126337	189002	217173	169788	179825	182962	180696	187801	180689
M130T66	130.085	65.561	DL-arginine	[M+H-CH3ON]+	HMDB0000517/HMDB0003416	C00792	Organic acids and derivatives	Carboxylic acids and derivatives	Amino acids, peptides, and analogues	591467	618009	762946	480477	1.07579e+06	1.20408e+06	252244	258579	973254	406729	949522	218237	517387	715119	398459	457769	930155	345057	325332	631239	343963	461005	795429	560261	761602	736568	747667	776045
M148T388_2	148.06	387.645	DL-Glutamic acid	[M+H]+	HMDB0060475	C00025	Organic acids and derivatives	Carboxylic acids and derivatives	Amino acids, peptides, and analogues	1.86665e+06	1.83603e+06	2.13418e+06	1.36456e+06	1.55289e+06	2.05657e+06	1.79479e+06	1.38627e+06	1.94965e+06	2.3934e+06	1.89638e+06	1.76947e+06	1.62875e+06	1.86807e+06	1.75399e+06	2.13544e+06	2.40249e+06	2.36424e+06	2.15519e+06	2.34158e+06	1.59275e+06	1.94705e+06	2.14906e+06	1.44673e+06	2.31987e+06	2.31024e+06	2.32002e+06	2.27659e+06
M188T299	188.073	299.049	DL-Indole-3-lactic acid	(M+H-H2O)+						19365.2	27072.8	23464.6	14849.9	35830.3	33718.9	44695.9	40766.9	33884.6	53640.5	33116.5	41264.1	17871.9	38024.7	43124.6	34177.3	46281.5	41447	53677.4	54198.6	29867.5	69428.5	51448.2	33420.3	34358.5	32783.5	39294.8	39358.8
M147T519	147.112	519.171	DL-Lysine	[M+H]+	HMDB0142894	C16440	Organic acids and derivatives	Carboxylic acids and derivatives	Amino acids, peptides, and analogues	395239	535993	345181	335376	387970	510173	519737	353495	535135	565673	523182	574653	396038	494150	564742	428533	360710	754911	313462	697435	448097	363134	468174	378240	914685	1.02079e+06	915332	915005
M146T38	146.117	38.249	Dl-norleucine methyl ester	[M+H]+			Organic acids and derivatives	Carboxylic acids and derivatives	Amino acids, peptides, and analogues	34455.8	28971.3	20056.4	57403.2	26386	41414.8	48366.9	85645.6	1.13482e+06	37705.9	13975	25083	493628	35565.1	15514.8	15148.2	1.10538e+06	47792.3	89817.4	49149.9	31191.1	86045.5	42517.4	163023	42752.1	40898.6	40309.5	39950
M136T51	136.075	50.928	Dl-octopamine	[M+H-H2O]+		C04227	Benzenoids	Phenols	1-hydroxy-2-unsubstituted benzenoids	66478.1	48273.9	35848.9	69357.2	43024.1	42758.2	49537.5	50196.9	43815.6	56699.9	40081.9	37376.8	39251.7	51908.7	27806.3	46287.2	38474.8	39770.3	35280.7	30623.9	49112.7	48010.5	50712.4	53174.8	47623.4	47309.4	47619.5	46860.4
M166T250	166.086	250.157	DL-phenylalanine	[M+H]+		C02057	Organic acids and derivatives	Carboxylic acids and derivatives	Amino acids, peptides, and analogues	812126	1.46746e+06	826479	455214	738945	1.37428e+06	1.31841e+06	1.06388e+06	1.09818e+06	1.47857e+06	1.06097e+06	1.18474e+06	700929	1.43533e+06	1.13627e+06	706153	910396	1.76098e+06	860181	1.73349e+06	1.0854e+06	1.20003e+06	1.16588e+06	1.03009e+06	1.40817e+06	1.44384e+06	1.41349e+06	1.40809e+06
M116T302_2	116.07	301.731	DL-proline	[M+H]+	HMDB0000162	C00148	Organic acids and derivatives	Carboxylic acids and derivatives	Amino acids, peptides, and analogues	2.35136e+06	4.20799e+06	3.07759e+06	1.34203e+06	2.43747e+06	3.61078e+06	2.92626e+06	1.83249e+06	3.41889e+06	2.65013e+06	3.08358e+06	2.71906e+06	1.88173e+06	2.17473e+06	2.75687e+06	2.59028e+06	2.34718e+06	2.51043e+06	1.55506e+06	3.2771e+06	2.65055e+06	1.44082e+06	2.39004e+06	1.77439e+06	3.06688e+06	3.14567e+06	3.14572e+06	3.13168e+06
M134T75	134.08	74.848	Dl-threonine methyl ester	[M+H]+			Organic acids and derivatives	Carboxylic acids and derivatives	Amino acids, peptides, and analogues	182656	335218	156320	56759.5	151900	176140	137032	108688	149930	106438	183401	68370.8	146461	131967	86161.9	126055	115304	89458	81361.8	110526	99039.4	92608.3	108707	75839.6	131136	131916	128396	131915
M205T258	205.096	258.434	DL-tryptophan	[M+H]+	HMDB0030396	C00078	Organoheterocyclic compounds	Indoles and derivatives	Indolyl carboxylic acids and derivatives	1.43783e+06	1.26621e+06	571889	675291	1.43166e+06	546691	570846	538082	604260	495933	802688	517357	555449	747963	579374	543327	630414	622686	727131	574429	502915	498548	1.61411e+06	437450	800819	776407	776370	782248
M363T370	363.154	369.783	DL-tyrosine	[2M+H]+	HMDB0000158	C00082	Organic acids and derivatives	Carboxylic acids and derivatives	Amino acids, peptides, and analogues	609205	423011	485332	777613	585314	626097	724732	560848	394227	466361	576456	586039	551350	331004	476658	443939	463912	584294	692733	598467	525504	347827	433576	339408	734917	724877	716583	737837
M118T335	118.085	335.307	DL-valine	[M+H]+	HMDB0000883	C00183	Organic acids and derivatives	Carboxylic acids and derivatives	Amino acids, peptides, and analogues	367643	292804	335204	270342	250880	384257	344443	348813	172009	236802	148739	245739	269891	353957	312311	267040	280170	282486	210375	393503	172321	384033	223334	163960	284030	286533	285790	289238
M487T360	487.319	359.603	Docosahexaenoylserotonin	[M+H]+			Organoheterocyclic compounds	Indoles and derivatives	Tryptamines and derivatives	79250	75761	118316	40204.9	83658.2	57014.3	65859.3	19966.7	37041	97895.6	33910.7	95332	114556	69895.5	70823	81844.5	69361.9	110017	53976.2	135966	117210	10190.7	49846.6	128345	37773.5	23989.8	37880.9	25695.5
M136T35	136.079	34.8615	Dopamine	(M+H-H2O)+	HMDB0000073	C03758	Benzenoids	Phenols	Benzenediols	17902	14049.9	16882.9	64285.9	13982.5	14929.5	21423.6	18588.2	17957.6	20372.4	26775.5	13098.1	28748.4	10006.8	25849.8	16913.1	30054.4	9946.51	1286.66	12575	7966.72	16968.4	13378.1	11506.7	22950.9	22942.2	22616.5	18545.4
M452T487	452.198	486.583	Doxazosin	[M+H]+	HMDB0014728	C06970	Organoheterocyclic compounds	Diazinanes	Piperazines	16429.3	30102.2	13388.5	16472	31708	16920.8	20478.2	23139.8	21677.9	22916.4	29807.9	25918.5	20591.6	21090.7	20128.6	39461.3	20443.7	18999.6	21257.4	37024.4	15958	18081.2	28854.6	21227.5	34411.5	33417	30441.2	35272
M280T370	280.174	370.037	Doxepin	[M+H]+		C06971	Organoheterocyclic compounds	Benzoxepines	Dibenzoxepines	64692.5	93717.2	82737.3	36973.1	12961	27515.5	49899.1	66715.7	17080	153949	36812.1	26040.9	45940.1	98885.1	35703.5	84413.2	31619.4	68587	81821.4	50188.6	29361.5	84312.8	78650	48297.1	62800.1	70334.3	62998.6	64017.3
M557T339	557.315	339.204	Dronedarone	[M+H]+			Organic oxygen compounds	Organooxygen compounds	Carbonyl compounds	34441.3	27077	28877.1	10495.5	29258.5	30106.4	39304.9	10489.7	25287.3	33297.8	16643.4	24056.1	28928.9	39136.3	116898	45882.7	37921.6	39401.2	35946.9	30918.6	40642.4	12480.1	48691.8	34959.9	34302.2	27177.2	24562.3	29088.7
M244T181	244.011	181.256	E-64	[M+H]+		C01341	Organic acids and derivatives	Carboxylic acids and derivatives	Amino acids, peptides, and analogues	29710.4	28085.3	29619.7	31508.8	38716.6	33105	2833.84	32285.5	28423.2	28507.8	31959	17968.2	43276.7	30411.3	23306.8	33487.8	30889.6	4213.82	31575.1	14946.3	31929.9	25184.4	32194.2	22185.1	1718.83	1525.37	1286.4	2037.14
M271T181	271.143	181.344	E-resveratrol trimethyl ether	[M+H]+						44019.5	61030.6	18411	85845.4	54433	56056.7	78984.2	55332.9	62237.9	37063.3	62256	55999.7	51123.7	77240.7	68099.7	43435.6	57240.4	90987.4	45972.9	57210.5	55506.8	76420.1	70729	54077.4	79529.2	77280.3	79531.3	77285.1
M470T307	470.285	306.799	Ebastine	[M+H]+	HMDB0060159		Benzenoids	Benzene and substituted derivatives	Diphenylmethanes	13108.2	15788.7	14488.5	21253.4	17325.3	10352.5	16272.4	6889.86	9850.85	9599.99	16759.5	12913.6	7084.53	19695.4	17139.8	16924	19424.9	19894.9	18017.1	15113.2	11794.7	13934.3	9641.77	11259.2	19113.1	20345.6	20306.4	12748.8
M398T485	398.201	484.793	Echimidine	[M+H]+		C10299				27168.8	33995.4	68539.6	46767.3	28924.4	47265.9	32397.5	27319.3	27925.4	103106	28802.9	166045	28195.9	43168.9	32306.1	51801.3	45113.8	80084.6	87222.6	61072.9	31865.6	90465.3	63926	117816	68359.6	66083.4	66064.5	66846.8
M414T285	414.198	285.318	Echimidine n-oxide	[M+H]+						34353	33730.6	29115.6	56647	37406.8	24985.3	41514.4	29735.7	15735.5	26163.8	57263	20679.6	18040.8	76990.9	38218.1	53004.9	41091.2	93596	50160	36206.2	23172.2	40962.8	40259.4	37811.7	59868.2	57701.7	51034	60006.1
M427T246	427.35	246.253	Echinocystic acid	[M+H-CH2O2]+		C08942	Lipids and lipid-like molecules	Prenol lipids	Triterpenoids	10303.2	6509.54	12072.9	7968.31	11182.3	6773.08	7381.12	7450.56	9298.32	6869.21	11488.4	8600.83	12413.2	8302.22	9790.01	11739.6	11261.7	10166.4	7404.61	8965.91	7369.3	5787.72	8890.66	8098.51	10261.4	10253.6	9992.1	9595.25
M143T327	143.081	326.646	Ectoine	[M+H]+		C06231	Organic acids and derivatives	Carboxylic acids and derivatives	Amino acids, peptides, and analogues	37634.6	41314.3	28290.8	29269.2	26785	36106.7	53650.6	66224.1	40209.2	57918.7	31716.7	42459.6	52913.6	25188.2	36496.8	38149.9	38110.3	46832.5	35234	49395	87829.5	46908.6	32650.7	41618.2	37877.2	37088.3	36947.4	37553.2
M303T304	303.181	304.234	Enalapril	[M+H-C3H6O2]+	HMDB0014722	C06977	Organic acids and derivatives	Carboxylic acids and derivatives	Amino acids, peptides, and analogues	28326.5	12667.8	25294.5	25119.7	23355.6	12564.9	18304.3	22644.8	18684.4	16132.8	26777.6	11567.7	13956.1	23164	21696	16568.9	12986.4	27632.2	18389	27058	20818.8	22018.3	22509.9	20553.9	22076.1	21326.2	21119.7	25725.8
M349T402_2	349.171	402.318	Enalaprilat	[M+H]+	HMDB0041886	C11720	Organic acids and derivatives	Carboxylic acids and derivatives	Amino acids, peptides, and analogues	61904.6	166871	108346	206807	226030	272708	159100	109122	208414	97452	202513	150522	159811	87143.8	164351	96227.6	129891	89898.4	114278	111934	141774	91590.1	75641.7	108787	148141	148200	148162	99856
M321T389	321.156	388.51	Enoxacin	[M+H]+	HMDB0014610	C06979	Organoheterocyclic compounds	Diazanaphthalenes	Naphthyridines	16716.4	137712	24370.6	41775.7	147056	164944	101580	29534.3	153539	25877.5	124152	122570	29401.1	36525.1	82657	45350.7	32525.6	40289.9	33542.2	42489.5	63290.3	27801.2	26231.2	39411.1	68914	68845.5	67352.4	63212.6
M299T37	299.127	36.7315	Enterolactone	[M+H]+	HMDB0006101	C18165	Lignans, neolignans and related compounds	Furanoid lignans	Tetrahydrofuran lignans	123346	92249.5	76895.1	115305	105767	124371	103119	120764	191461	148356	109506	91767.5	127054	99523.1	79663.2	64411.3	106732	79516	88377.6	90390.5	139185	80209.2	157241	75108.9	120010	119930	118385	110682
M148T209	148.111	208.684	Ephedrine	[M+H-H2O]+	HMDB0015451	C01575	Benzenoids	Benzene and substituted derivatives	Phenylpropanes	14354.2	23948	16930.8	16570.6	23241.8	14650.4	29830.5	18449.8	30418.5	19977.2	46126.6	17040.9	12671.9	27646.1	21535.6	14322.2	13511.7	18305.2	14734.6	24757.6	19040.2	19314.2	34545.9	11537.5	27732.4	27111.6	26958.9	26955.5
M433T332_2	433.2	332.152	Eplerenone hydroxy acid	[M+H]+						1.28568e+06	1.05277e+06	1.10993e+06	2.81528e+06	1.50426e+06	1.37769e+06	1.54865e+06	1.64023e+06	1.5674e+06	999862	1.70754e+06	1.2149e+06	2.07199e+06	2.32569e+06	1.33603e+06	1.76011e+06	2.89581e+06	2.58177e+06	2.56693e+06	1.61906e+06	1.65757e+06	2.21315e+06	1.80112e+06	1.61235e+06	2.15929e+06	2.12534e+06	2.1593e+06	2.15007e+06
M420T335	420.272	335.319	Epothilone b	[M+H-C3H4O3]+		C12154	Phenylpropanoids and polyketides	Macrolides and analogues	Epothilones and analogues	58384.8	79159.2	55026.6	79567.1	61846.1	52932.7	53868.3	50426.6	58323.2	41884.4	64161.1	56167.9	63817.6	66586.1	63534	70369.3	69867	83970.7	71663.7	61575.9	59542.4	58628.2	68627.5	58679.1	70580.5	73156.3	88580.8	70566.3
M594T266	594.286	266.177	Ergocristam	[M+H]+			Alkaloids and derivatives	Ergoline and derivatives	Lysergic acids and derivatives	49898.8	29085.7	35978.4	46786.6	25732.4	43245.5	60102.3	13012.1	45829.9	48898.6	26970.1	64008.9	14564.1	40050.2	35354.6	45334.8	61843.5	36569.5	39834.7	57833.9	64857	28804.9	23071.9	45815.9	72507.5	91232.5	91384.9	64178.4
M326T329	326.177	328.856	Ergonovine	[M+H]+	HMDB0015383	C07543	Alkaloids and derivatives	Ergoline and derivatives	Lysergic acids and derivatives	46610.5	40260	52206.1	35270.8	26655.4	72511.8	40743.2	60829.8	46666.3	38167.9	43051	36414.5	40746.6	51016.2	29604.7	43541.9	55908.4	61613.9	48534	63255.5	24216.2	43946.8	58835.2	45075.8	39987.7	38002.5	34858.8	34158.3
M582T450	582.289	449.569	Ergotamine	[M+H]+	HMDB0014834	C07544	Alkaloids and derivatives	Ergoline and derivatives	Lysergic acids and derivatives	19715.8	18871.8	22750.7	27235.7	23135.7	22084.3	22380.4	21859.4	22268.8	25358.7	18732	24023.8	9012.8	24908.9	21897.2	21980.2	19448.2	9050.72	27273.8	22865.5	24277.3	19469.2	20449.4	22468.8	26625.9	22957.7	26675.7	25609.6
M534T439	534.284	438.868	Ergovaline	[M+H]+			Alkaloids and derivatives	Ergoline and derivatives	Lysergic acids and derivatives	13784.1	13647.2	12189	14042.2	17569.1	9430.65	13595.1	15396	9073.18	26857.4	12798	11543	10193.9	25379.8	8860.53	9514.16	12193.9	30402.5	18445.2	22893.1	10687.9	34190.7	24971.9	31534.4	20837.2	22435.8	21497.6	20029.2
M338T35_2	338.34	34.614	Erucamide	[M+H]+			Lipids and lipid-like molecules	Fatty Acyls	Fatty amides	262018	240928	325540	742635	427985	279346	630936	728260	569304	618735	407386	399410	703223	374926	292516	834807	427769	406454	289490	323593	604011	661271	711492	343007	589989	617385	606513	617168
M420T448	420.15	447.67	Esfenvalerate	[M+H]+	HMDB0031791	C10988	Lipids and lipid-like molecules	Fatty Acyls	Fatty acid esters	8655.67	17068.6	16951.6	15441.5	8803.95	20146.6	18035.9	6582.95	6826.89	23617.6	15014.1	11722.8	13187.2	33931.9	5256.42	8986.22	15833.7	22798.6	35611.5	11214.5	25954.5	22564.8	14024.4	16777.6	20068.4	14434	24537.5	16117.5
M271T397	271.165	396.839	Estra-1,3,5(10),7-tetraene-3,17.beta.-diol	[M+H]+		C14485	Lipids and lipid-like molecules	Steroids and steroid derivatives	Hydroxysteroids	264376	1.61748e+06	1.07421e+06	1.39124e+06	2.12204e+06	1.82061e+06	1.5945e+06	996328	1.86521e+06	774104	1.88302e+06	1.73112e+06	1.45992e+06	207692	1.45991e+06	1.14959e+06	973016	280414	691956	799718	1.45928e+06	249428	772836	941182	1.21655e+06	1.21908e+06	1.1937e+06	1.22463e+06
M271T342	271.164	342.074	Estriol	[M+H-H2O]+	HMDB0000153	C05141	Lipids and lipid-like molecules	Steroids and steroid derivatives	Estrane steroids	103769	107830	129370	137711	136733	118170	111512	104759	133397	95072.7	135287	314063	125565	63876.3	133143	119438	119506	73414.9	112609	100986	128852	77499.2	106243	91494.1	122413	127343	127367	125794
M271T156	271.179	155.708	Estrone	[M+H]+	HMDB0000145	C00468	Lipids and lipid-like molecules	Steroids and steroid derivatives	Estrane steroids	66057.8	195709	108333	93086.5	85736.1	89812.6	45469.2	76315	84066.7	37181.9	69492.2	92362.8	50109	91550.2	69974.8	64023	75564.6	76916.3	91420.3	18606.1	59148.3	93058.6	66096.3	40327.5	93612	89065.2	93271	69826.7
M205T152	205.169	152.186	Ethambutol	[M+H]+	HMDB0014474	C06984	Organic nitrogen compounds	Organonitrogen compounds	Amines	128941	150324	152512	195705	53743.8	183706	148624	136922	105475	123274	170715	142722	78516.5	164960	177048	75333.6	64492.7	201748	219703	69318.4	104213	175163	195742	45947.6	132988	186020	186004	185186
M102T301	102.091	300.597	Ethanol, 2-[[3-(2,3-dichlorophenoxy)propyl]amino]-	[M+H-C6H4Cl2O]+			Benzenoids	Benzene and substituted derivatives	Halobenzenes	36277.1	28938.7	26425.6	37795.5	36183.3	28857	34031	38089.1	65112.6	42922.3	40485.4	37974.9	30716.4	36863.9	57371.8	42880.4	48147.2	35883.2	42117.7	45385.9	37260	40153.8	51665.8	30225.1	38713.9	41740	38743.6	39643.3
M301T453	301.185	452.571	Ethanone, 1-[1-(4-fluorophenyl)-2,5-dimethyl-1h-pyrrol-3-yl]-2-(1-pyrrolidinyl)-	[M+H]+			Organoheterocyclic compounds	Pyrroles	Substituted pyrroles	33958.1	24396.9	29108	32445.4	33718.9	34215.4	30430.5	23553.2	25496.7	36724.7	32347.3	39776.6	11365.8	22153.5	35853.4	27199.8	52513.7	50412.5	17259.6	54610.5	33920.4	38720.2	34435	48402.4	35459.6	24875.3	33128.3	35424.4
M336T206_2	336.19	205.766	Ethanone, 2-(2-methoxyphenyl)-1-(1-pentyl-1h-indol-3-yl)-	[M+H]+			Organoheterocyclic compounds	Indoles and derivatives	Phenylacetylindoles	48055.4	15407.1	49157.1	96945.5	40911.3	103798	72582.5	90488.5	52508.2	39292.2	57058.3	26967.7	65892.9	55089.5	53451.6	80665	23758	65672.5	200961	63615.6	19504.8	53245.5	100261	81762.6	79136.3	72980.4	58544.6	78964.6
M188T262	188.164	261.566	Ethanone, 2-(3-methoxyphenyl)-1-(1-pentyl-1h-indol-3-yl)-	[M+H-C9H8O2]+			Organoheterocyclic compounds	Indoles and derivatives	Phenylacetylindoles	13163	32133.2	12331.1	13619	30754.6	32205.6	24117.8	16965.5	14138.5	14209.7	22791.9	29512.3	16758.9	8669.56	26751.9	16927.4	8214.48	14632.2	4032.17	6912.28	22173.6	9072.22	5545.61	8001.66	23790.9	24370.2	24364.5	22003.3
M142T114	142.097	114.106	Ethosuximide	[M+H]+	HMDB0014731	C07505	Organoheterocyclic compounds	Pyrrolidines	Pyrrolidones	53508.3	139292	101572	109218	81070.6	68864.3	112576	167813	41587	168034	147102	87913.3	86308.2	111925	12248.2	117155	105108	72430.8	61315.7	23952.9	204091	159706	182169	70207.8	109274	108580	116071	116031
M398T398	398.192	398.276	Ethyl (1-(4-fluorobenzyl)-1h-indazole-3-carbonyl)-l-valinate	[M+H]+			Organic acids and derivatives	Carboxylic acids and derivatives	Amino acids, peptides, and analogues	63672.4	30957.3	44482.7	75445.4	59662.9	45626.3	70101.7	70689.4	68953.9	66314.1	42437.6	24170.7	65071.6	69677.8	69520.2	64601.9	71620.4	91220	90092.8	76026.3	64501.8	61306.3	71492.9	70781.4	84563.8	84337.2	80456.3	61808.3
M173T325_2	173.128	325.432	Ethyl 4-amino-1-piperidinecarboxylate	[M+H]+			Organoheterocyclic compounds	Piperidines	Piperidinecarboxylic acids and derivatives	16480.5	19404.6	15939.7	14985.3	16883.1	17078.8	14859	15464.8	18606.9	13129.3	19158.6	16895.3	13659.9	12333.2	15615.7	12648.3	13278.1	8423.76	10940.5	12105.6	18768.2	8807.18	29108.6	11460.9	14567.7	13543.1	13203.2	13203.9
M134T284	134.117	284.497	Ethyldiethanolamine	[M+H]+			Organic nitrogen compounds	Organonitrogen compounds	Amines	18655.1	27773.2	22067.5	35681.6	15837.4	39488.1	37662.2	40801.1	22752.7	9823.72	11511.6	26544.4	24347.2	24164.9	26798	26051.4	11924	11569.1	15603	22289.1	33777.4	38999.8	44092.9	22612.2	26870.3	27760	27560.7	27170.9
M394T230	394.224	230.441	Etofenprox	[M+NH4]+		C18410	Benzenoids	Benzene and substituted derivatives	Diphenylethers	77547.6	64719	74246.7	111113	79940.7	79089.1	82062.8	74098.9	71846.4	58644.3	103299	80582.8	73544.2	97729.6	93034.9	83743.3	109830	107117	104484	132139	84172.6	89833.5	99431.1	87927.8	117656	118451	118452	114463
M793T244	793.353	243.615	Euphodendroidin m	[M+Na]+			Lipids and lipid-like molecules	Prenol lipids	Diterpenoids	24164.7	12869.3	21377.7	24155	20296.4	21088.1	21482.4	13867	11980.6	16660.1	12780.3	16335.1	14570	12384.4	23499.2	24073.2	24256.3	27049.5	17778.8	23087.9	20029.4	11051	21873.7	18913.2	24748.3	25124.5	21409.6	23521.3
M331T417	331.149	416.929	Eurycomalactone	[M+H-H2O]+		C08759	Lipids and lipid-like molecules	Steroids and steroid derivatives	Steroid lactones	219993	100180	98917.6	81045.9	98476.1	98690.9	93872.4	100309	111224	98408.8	103857	86889.3	95876.2	116567	93995.1	137208	208557	93221.2	98050.9	181450	170649	86951.6	89683.6	97213.9	99555	102806	97873.3	97842.3
M171T54	171.091	53.7045	Evodiamine	[M+H-C8H7ON]+		C09187	Organoheterocyclic compounds	Indoles and derivatives	Pyridoindoles	143930	150989	117933	94747.9	122458	117814	125945	119918	87878.3	82061.6	123312	88494.9	77614.2	100275	61213.5	76418.1	62353.8	90136.7	95155.5	41760.8	115467	85557	106071	70122.7	98306.6	103838	104503	104516
M370T446	370.132	445.629	Evoxine	[M+Na]+		C10670	Organoheterocyclic compounds	Quinolines and derivatives	Furanoquinolines	44349.5	8961.9	44451	64414	24237.4	35822.3	8072.59	9352.14	53979.3	80026.8	9586.17	121395	8675.51	30526.5	47698.1	28165.6	28526.1	33293.3	86524.2	53056.9	22536.3	89554.6	22137.9	133853	56900	57432.1	56899.2	57811.2
M322T358	322.14	357.523	Famciclovir	[M+H]+	HMDB0014570		Organoheterocyclic compounds	Imidazopyrimidines	Purines and purine derivatives	81361.9	75759.2	86184	101441	83275.9	77847.9	85802.8	84628.8	90653.2	86189.5	88968.6	10064.6	85453.4	116714	88900	82477.2	96211.4	95316.4	94756.6	85145.7	84036.8	97463.8	88986.9	87372.3	83601.9	83574.8	85143.9	88595.6
M384T251	384.095	250.709	Felodipine	[M+H]+	HMDB0015158		Organoheterocyclic compounds	Pyridines and derivatives	Hydropyridines	8905.5	14700.6	9813.87	9884.13	17011.5	20955.6	8384.86	10099	16179.9	12459.3	15181.6	10631.2	12492.6	10400.4	11124.5	6226.93	6279.61	15091	11066.9	6389.02	8721.05	16110.7	12434.3	6048.84	15066.4	15064.5	14778.6	14055.9
M268T50	268.063	50.1	Fenbendazole	[M+H-CH4O]+	HMDB0029745	C21876	Organoheterocyclic compounds	Benzimidazoles	2-benzimidazolylcarbamic acid esters	42679.1	65928.4	74223.5	36801.1	85554.7	85245.3	73658.4	87708.9	47300.1	96431.5	51478	45524.9	60785.9	70626.4	16692.9	49510.2	32108.3	57953.5	56496.2	32890.6	33111.7	91330.9	119273	64785.3	70147.3	70148.8	71740.6	70682.1
M274T57	274.274	57.397	Fenpropidin	[M+H]+		C18726	Benzenoids	Benzene and substituted derivatives	Phenylpropanes	9.8591e+06	9.04529e+06	1.05607e+07	6.74812e+06	1.05901e+07	1.03371e+07	8.95444e+06	7.95942e+06	9.91182e+06	9.66776e+06	8.68805e+06	6.81366e+06	8.46397e+06	8.0879e+06	5.2843e+06	8.12468e+06	9.86282e+06	7.22759e+06	7.50458e+06	7.80304e+06	9.79997e+06	7.04223e+06	9.87066e+06	1.00097e+07	1.10861e+07	1.00804e+07	1.08762e+07	1.10869e+07
M255T179	255.149	178.626	Ferimzone	[M+H]+		C18579	Benzenoids	Benzene and substituted derivatives	Toluenes	32048.2	79057.8	31477.3	83783.1	88308.9	55704.8	55801.1	86146.3	78393.2	98221.8	47028.3	67392.9	63729.4	152005	133076	56138.5	59714.9	70269.9	92430.7	53973.1	58495.7	98334.5	88746.3	39811.2	109182	109364	109363	96582.7
M688T282	688.323	282.097	Ferrichrome	[M+H]+		C06228	Organic acids and derivatives	Carboxylic acids and derivatives	Amino acids, peptides, and analogues	24923	28700.5	24701.3	22260.4	25479.6	20068.1	19223.6	43901.2	23748.3	22322	19036.5	20756.8	32398.4	31881.9	27768.9	30748.2	31560.5	27616	28490.8	5226.11	18108.7	17079.3	26112.7	29935.8	28570.7	28581.1	27647.1	23047.7
M502T366	502.32	366.19	Fexofenadine	[M+H]+	HMDB0005030	C06999	Benzenoids	Benzene and substituted derivatives	Diphenylmethanes	3487.89	13571.2	9765.47	28625.7	21721.4	8272.62	9947.06	20807.2	16940.3	19267.5	5339.41	16774.9	6338.52	17632.6	9309.33	7256.38	14766.2	21286	13277	23095.6	6551.17	20383.3	18323.5	19149.9	14093.4	15109	14030.7	16566.7
M786T391	786.162	391.212	Flavin adenine dinucleotide (FAD)	(M+H)+	HMDB0001248	C00016	Organic oxygen compounds	Organooxygen compounds	Carbohydrates and carbohydrate conjugates	2701.42	2637.54	3462.64	5406.46	2854.3	3197.11	1467.63	2185.82	1828.85	4199.28	2971.03	1808.03	2945.08	5912.45	3855.29	2669.07	5509.14	6396.64	8549.25	3494.78	3420.66	7529.01	6411.19	5522.16	5666.87	5131.38	5658.03	5603.68
M439T283	439.099	282.586	Flavine mononucleotide	[M+H-H2O]+	HMDB0001520	C00061				21385.4	19849.5	15761	3814.85	12692.4	17559.6	16956.8	10264.1	25976.4	16627.4	18315.5	17281	12957.6	6603.47	14193.3	13005.5	5649.02	5970.19	7842.47	12870.7	10798.8	6978.21	9832.53	3069.07	15924.7	15578.4	14389.9	15907.2
M423T508	423.196	507.779	Fludrocortisone	[M+H]+		C07004	Lipids and lipid-like molecules	Steroids and steroid derivatives	Pregnane steroids	32901.9	21898.7	26203.6	51496.5	25836.5	25241.4	23399.5	24655.8	21126.6	22270	23425.2	31485.9	23598.4	32527	27559.9	31062.3	33698.1	44849.4	38429	31488.6	29863.3	35866.4	32129.3	24406.2	36885.6	35112.9	36882	36643.9
M194T73	194.102	73.131	Flufenacet	[M+H-C3HF3N2OS]+		C18731	Benzenoids	Benzene and substituted derivatives	Anilides	56202.3	150243	102786	84688.1	104911	120547	83923.9	93264.8	125551	254391	115233	82300.5	192865	63068.4	39257.5	118319	179037	173766	181692	66466.7	119894	65862.8	86557.3	139446	125627	123777	123465	123467
M276T191	276.068	190.709	Flumazenil	[M+H-C2H4]+	HMDB0015336	C07825	Organoheterocyclic compounds	Benzodiazepines	1,4-benzodiazepines	150691	261557	181251	75262	128274	215456	155640	82871.4	269908	120256	180305	133570	108403	90012.4	195990	159555	97247.6	124787	98339.1	124662	65945	81635.3	104561	40000.1	262244	272638	262369	262264
M477T176	477.265	175.76	Flumethasone pivalate	[M+H-H2O]+	HMDB0014801		Lipids and lipid-like molecules	Steroids and steroid derivatives	Pregnane steroids	260112	186519	320036	290115	248040	207323	471895	260089	172187	189450	183388	240253	209252	295606	252586	305263	372010	465309	392574	331623	235457	191186	298266	189932	310221	315302	341044	309083
M435T448	435.214	448.288	Flunisolide	[M+H]+	HMDB0014326	C07005	Lipids and lipid-like molecules	Steroids and steroid derivatives	Hydroxysteroids	170298	57818.8	186940	416874	64169	39445	167150	84224.1	74649	100448	138886	25175.6	178206	232570	155969	249802	278944	124003	283167	164185	86755.2	151814	128735	117458	144892	139267	125946	145411
M314T216	314.117	215.56	Flunitrazepam	[M+H]+	HMDB0015510		Organoheterocyclic compounds	Benzodiazepines	1,4-benzodiazepines	23424.3	12976.5	23619.7	47939.8	22178.8	18778.5	13100	10500	22159.9	25572.8	16718.7	20049.3	25102.9	25251.8	30229.8	28542.5	38867.5	36712.1	39148.7	30671.3	23642.4	27749.4	18717.6	25644.7	31341.6	34437.2	33002.3	34423.2
M311T368	311.105	367.707	Fluotrimazole	[M+H-C2H3N3]+		C18939				27872.2	126855	76166.9	115716	174482	147806	143963	81326.2	135911	71027	156806	130731	104678	21640.1	110058	89968	83519.8	48023.8	81265	69584.1	113068	38655.2	66670.8	92589.8	111310	110684	111930	109715
M434T376	434.187	376.476	Fluvastatin	[M+Na]+		C07014	Organoheterocyclic compounds	Pyrroles	Substituted pyrroles	1.56393e+06	861741	797276	1.12165e+06	1.31706e+06	766618	271326	779873	860975	896849	1.21646e+06	930249	778118	1.46116e+06	264810	1.2166e+06	999297	852882	600408	1.60337e+06	762842	442947	1.2802e+06	853223	1.06458e+06	1.11821e+06	1.071e+06	1.09301e+06
M269T294	269.095	294.216	Formononetin	[M+H]+	HMDB0005808	C00858	Phenylpropanoids and polyketides	Isoflavonoids	O-methylated isoflavonoids	41147.7	46783.1	43260.8	40869.2	39546.4	50588	42557.6	45411.2	46463.9	46155.5	51304.3	34139.8	43323.8	52475.3	48000.5	42903.5	52982	56361.5	62632.4	73361.2	41608.4	39760.3	43779.1	40854.1	54730.9	54737.6	56906.2	55217.6
M433T171	433.238	170.94	Forskolin	[M+Na]+		C09076	Lipids and lipid-like molecules	Prenol lipids	Triterpenoids	214265	146716	203260	255328	140196	150867	257301	138746	88985	127084	137180	185587	144897	224666	144426	266378	264897	330362	264489	183336	109300	103183	175876	101462	230766	282271	282441	282200
M380T278	380.216	278.149	Fumitremorgin c	[M+H]+	HMDB0038642	C20604	Organoheterocyclic compounds	Indoles and derivatives	Pyridoindoles	55113.7	39119.3	46188.4	68453.2	56641.4	63295.5	82539	55666	35423.6	58434.3	37557.8	88785.3	51108.4	67892.2	65186.8	73629.3	86456.8	121586	96549.6	81343.2	61954.6	59643.9	61199	41068.4	115980	113771	112652	112662
M722T401	722.392	401.203	Fumonisin b1	[M+H]+	HMDB0034702	C19241	Organic acids and derivatives	Carboxylic acids and derivatives	Fumonisins	48337.4	50516.1	68471.8	74540.4	46139.9	86021.5	69477	94403.9	33032.7	77888.3	33783.4	73412.3	56364.5	64813.9	34926.8	42277.8	91776.5	149522	787794	103350	89318.2	748180	64785.9	144711	153517	157144	156154	154676
M706T364	706.396	364.13	Fumonisin b2	[M+H]+	HMDB0034703	C19242	Organic acids and derivatives	Carboxylic acids and derivatives	Fumonisins	7734.35	5889.39	11387.4	9311.78	9523.7	10088	9468.24	9863.22	6368.41	7905.41	8933.93	8452.89	9376.65	8188.03	7884.89	9183.25	2685.06	12863.3	43475.8	11585.6	10625.3	38699.8	9901.86	8262.03	9145.74	9058.55	10895.5	9088.79
M316T283_2	316.138	282.671	Furametpyr	[M+H-H2O]+		C18503				120152	130566	65430.2	69982.3	63063.6	55245.7	151805	90386.9	168180	46773.3	117582	100897	55298	92223	112655	88444.3	64931.2	61220.8	76399.2	100727	74978.8	90279.3	80113	89094.3	89551.8	94665.8	94685.7	93146.1
M539T293	539.339	293.084	Fusidic acid	[M+Na]+	HMDB0015570	C06694	Lipids and lipid-like molecules	Steroids and steroid derivatives	Steroid esters	8780.09	13130.3	18590.2	28309.9	8128.16	7587.34	19504	19188.8	4586	17430	18984.4	19574.7	16324.6	26667.7	21608.2	19676.5	25183.5	54065.8	29126.2	18351.7	21153.1	22207.6	27099.7	28971.2	29587.7	33583.3	32378.8	35794.8
M146T349_2	146.092	349.312	G-guanidinobutyrate	[M+H]+	HMDB0003464	C01035	Organic acids and derivatives	Carboxylic acids and derivatives	Amino acids, peptides, and analogues	185122	642113	275931	119247	289718	598587	260957	236310	601573	529512	288153	221405	196792	166723	245921	171233	156816	214064	147809	355899	221695	214571	142262	241371	238726	242852	238721	239960
M681T66	681.209	65.995	G0	[M+2Na]2+			Organic oxygen compounds	Organooxygen compounds	Carbohydrates and carbohydrate conjugates	1.34348e+06	564664	796991	463572	465475	454914	618968	352072	616193	536238	853782	481004	1.35303e+06	432574	287693	518679	806346	617993	517327	217776	376332	408686	386523	989507	495994	442666	429727	407549
M172T583	172.115	583.475	Gabapentin	[M+H]+	HMDB0005015	C07018	Organic acids and derivatives	Carboxylic acids and derivatives	Amino acids, peptides, and analogues	36500.8	38538.7	34856.7	36058.6	33928.9	33899.4	32206.7	35647.8	37168.2	44454.1	40075.1	31978.1	33156.6	35075.8	34899.9	35805.6	33652.5	34327.8	31312.7	46313.3	35378.3	33597	34646.9	33258.2	36919	38065.6	36935.1	37423
M403T142	403.228	141.623	Gamabufotalin	[M+H]+		C16962	Lipids and lipid-like molecules	Steroids and steroid derivatives	Steroid lactones	352942	172240	183306	227567	124557	349681	127635	143047	245999	323654	302866	271728	158024	369841	252714	190439	174484	197772	203520	365378	251663	187848	141913	155945	193748	212556	212464	208823
M260T146_1	260.073	146.433	Gamma-l-glutamyl-l-glutamic acid	[M+H-NH3]+	HMDB0011737	C05282	Organic acids and derivatives	Carboxylic acids and derivatives	Amino acids, peptides, and analogues	308891	627268	513178	62893.8	389302	520380	139642	87306.2	600442	168792	603198	147882	193260	112900	247594	574849	340262	176964	65593.9	233812	143507	79458.4	187427	78869.1	397178	404128	394978	394987
M410T584	410.316	584.351	gamma-Tocotrienol	M+						27641.4	27383.4	29496.1	29255	23974.5	30136.8	26861.8	26190.8	25627.8	28015.9	27310.7	26692.8	27351.6	31185.9	29334.8	28139.2	28550.3	27541.1	31221.4	26812.9	28531.7	31171.8	29047.6	30916	29904.7	29902.9	30094.6	30555.9
M595T172	595.305	172.475	Ganoderic acid h	[M+Na]+			Lipids and lipid-like molecules	Prenol lipids	Triterpenoids	25192.6	22350.8	36955.3	68258.3	34957.2	33394.4	43589.2	34705	29984.9	19487.3	16222	22695.3	27449.1	40378.1	36061.7	38486.7	43436.6	63232.7	47866	25477.2	37017.1	32742.7	36410.2	29787.5	43294.7	35445.1	45586.2	45636.7
M647T507	647.328	507.443	Garcinolic acid	[M+H]+			Organoheterocyclic compounds	Benzopyrans	1-benzopyrans	5097.13	4183.62	4282.37	7050.88	4766.24	4795.83	10178.1	8622.95	4113.44	5761.71	6056.22	6716.63	4499.11	5421.71	5412.38	5392.41	5209.5	9477.7	8525.21	9105.55	4554.48	6288.2	5447.88	9663.55	8486.22	7956.2	7523.12	8150.26
M397T413	397.168	413.238	Gartanin	[M+H]+	HMDB0030700	C10063	Organoheterocyclic compounds	Benzopyrans	1-benzopyrans	38365.3	36601.3	37135.7	41447.4	40979.8	39258.7	34922	34902.9	41995.8	32591.7	38168.8	35782.9	40491.3	22404.1	30874.5	48449.1	47724.4	37130.5	44131.2	28610.5	31073.3	36779.5	42115.3	35496.5	40012	38495.9	38539.7	38496.6
M583T450	583.279	450.43	Geldanamycin	[M+Na]+		C11222				22347.8	14454.5	20178.3	26827	21531.6	22841	17540.5	19413.4	18285.6	17667.2	15628.4	8253.89	16792.2	24516.3	23996.6	19196.5	24224.8	23846.6	22648	21754.3	23617.9	22186.1	22660.1	12533.5	27302.4	26909.4	29413.5	26900.3
M228T266	228.053	265.702	Gemcitabine	(M+H-2H2O)+						19507.9	28269.1	51010	24682.9	15629.6	17068.9	48622.7	51323	7442.3	7303.65	17170.7	7052.24	34146.1	46320	48633.7	27644	21174.4	62438.1	8361.72	7989.31	5414.97	33157.5	44165.2	35381.1	5280.27	8371.74	7801.91	8383
M219T137	219.184	136.807	Germacrone	[M+H]+		C16966	Lipids and lipid-like molecules	Prenol lipids	Sesquiterpenoids	76537.5	86849.7	46055.2	87291.2	45877.3	42457.6	27882.9	35434.1	24929	17735.3	75307.5	59562.9	25937.7	70565.7	64594.7	47533.3	14259.3	37899.1	62143	34682.4	47332.7	84963.4	60167.5	52346.2	67339.9	67190.1	51971.8	67327.2
M309T393	309.18	392.904	Gestrinone	[M+H]+	HMDB0002720		Lipids and lipid-like molecules	Steroids and steroid derivatives	Estrane steroids	104112	444719	276969	359992	552203	489249	414832	258522	539659	204224	514803	462782	348656	98443	380095	300421	275518	104536	216850	227537	369087	103673	225667	247435	340902	343326	343321	341777
M283T202	283.143	202.207	Gibberellic acid	[M+H-CH4O3]+	HMDB0003559	C01699	Lipids and lipid-like molecules	Prenol lipids	Diterpenoids	47944.5	54676.3	48939.8	53571.2	36886.1	48361.4	68650.9	51019.1	67247.5	109133	46197.7	50452	68524.1	49882.2	62634.2	71740.5	49285.9	54073.9	42866.1	44538.3	47896.7	56118.9	59439.1	94091	82727.9	124875	80543.6	84228.7
M333T397	333.179	396.709	Gibberellin a4	[M+H]+		C11864	Lipids and lipid-like molecules	Prenol lipids	Diterpenoids	31454.3	143342	102338	124175	177946	158299	140694	101574	191477	89098.7	208354	159166	127421	30101.2	136950	113789	87518.9	23816.5	83646.7	79681.6	129892	32766.5	78347.5	100289	124366	129359	124345	126198
M303T431	303.175	430.745	Gln-arg	[M+H]+	HMDB0028791		Organic acids and derivatives	Carboxylic acids and derivatives	Amino acids, peptides, and analogues	18123.6	33002.9	15218.2	56996.8	37125.8	34967.3	37574	35350.3	32155.6	25472.2	30057.7	21512	30060.1	31726.1	30899.3	31108.8	27939.9	138724	38090.2	34457.2	29742.5	44467.1	39049	44026.9	41104.9	42361	40710.4	40762.7
M389T424	389.2	424.48	Gln-Asn-Lys	[M+H]+			Organic acids and derivatives	Carboxylic acids and derivatives	Amino acids, peptides, and analogues	42295	36205.3	30276.5	50355.3	54894.1	18674.4	37417	25363.9	43489.4	14048.9	43919.8	28974.1	28579	51606	28248.1	23418	43839.5	61482.2	54363.9	24205	19138.2	53245.5	48717	40535.2	46585.4	46782.1	46138.3	46783.2
M275T421	275.123	420.877	Gln-gln	[M+H]+			Organic acids and derivatives	Carboxylic acids and derivatives	Amino acids, peptides, and analogues	125346	128516	203297	231012	154427	122720	170328	268977	132193	242765	107112	135304	190972	232767	145597	230507	305354	277848	321217	237546	153042	274970	241232	184731	281270	352411	265949	265885
M332T383	332.159	382.887	Gln-Gly-Gln	[M+H]+			Organic acids and derivatives	Carboxylic acids and derivatives	Amino acids, peptides, and analogues	29495.2	23661.1	52463.8	48229.8	45932.7	37825.6	37408.6	36633.5	40410.8	26717.6	37922	35289.2	31692.2	33558.8	27815.6	32355	19352.4	21281.2	26100	31586.7	36328.8	27086	37111.6	24013.2	32005.6	27696.5	33286.7	33343.7
M275T449	275.169	448.64	Gln-lys	[M+H]+	HMDB0028802		Organic acids and derivatives	Carboxylic acids and derivatives	Amino acids, peptides, and analogues	32768.3	43641.4	32972.5	44082	27608.9	43855.6	47114.7	35826.4	23645.7	53024.7	23044.7	57600.5	10179.8	53469.2	22784.8	24562.7	37081.3	86239.5	56318.5	63782.6	36857.6	63751.1	73281.7	73481.9	56404.6	67973.1	56448.9	56717.2
M347T407	347.179	407.253	Glu-Ala-Lys	[M+H]+			Organic acids and derivatives	Carboxylic acids and derivatives	Amino acids, peptides, and analogues	76197.2	22773.1	26231.8	33587.3	29449.3	27198	26364	14682	29745.9	21342.5	27674.2	27064.1	30373.4	40400.9	25705.3	22749.7	31712.9	45020.9	30041.9	30697.6	25841.4	16807.1	53776	33763.6	32959.2	30965.8	22159.6	32650.6
M418T413	418.191	413.255	Glu-Asn-Arg	[M+H]+			Organic acids and derivatives	Carboxylic acids and derivatives	Amino acids, peptides, and analogues	48364.5	44890.5	40135.2	109698	40697.1	45139.1	70681.2	60690.7	40232.6	97630.7	28317.5	61396.8	40824.7	69862.9	53295.9	67566.2	75458.3	100684	134781	73921	73902.8	119254	64413.2	69936.2	83106.5	85410.2	87987.7	82902.5
M203T390	203.102	390.022	Glu-Glu-Lys	[M+2H]2+			Organic acids and derivatives	Carboxylic acids and derivatives	Amino acids, peptides, and analogues	35787.6	39748.1	31612.3	38668.9	46666	43545	42983	36643.9	33915.4	34104.3	44557.3	42712	33340	30962.9	29397	31867.7	36660.7	31661.3	24084.9	28728.6	31680.1	32026.7	32816.9	15607.7	39797.4	45284.5	38448.9	38378.1
M245T405	245.112	405.024	Glu-Pro	[M+H]+	HMDB0028827		Organic acids and derivatives	Carboxylic acids and derivatives	Amino acids, peptides, and analogues	151283	52770.4	64142.7	531053	44403.7	71470.8	67725.6	56175.5	41249.1	83193.1	56873.1	60028.5	39307.5	191508	68715.2	588496	47522.5	80744.1	199692	164552	76916.3	58445.8	49218.6	59970	86202.9	69787.1	71033.9	76619.6
M363T456	363.209	456.293	Glu-Ser-Lys	[M+H]+			Organic acids and derivatives	Carboxylic acids and derivatives	Amino acids, peptides, and analogues	52995.2	28618	22131.6	74470.6	38242	20454.5	20840.2	56373.9	23029.3	12097.9	28073	32313.1	31420.9	46380.4	52889.1	71366.8	27886.1	52154.8	118659	87399.8	57775	18958.9	61550.6	58617.4	73553.1	73549.2	81120.4	86993.9
M203T307_2	203.102	306.851	Glu-Thr-Arg	[M+2H]2+			Organic acids and derivatives	Carboxylic acids and derivatives	Amino acids, peptides, and analogues	1430.39	27571.8	77024.6	23468.1	15081.7	14567.7	12635.9	6406.82	10552.9	54634.8	10735.1	22297.2	14535.8	48653.6	24533.3	102306	104216	15115.2	83820.6	50096.3	19193.3	13809.1	29764.5	11927.8	29790.1	18592.5	19301.1	19011.2
M467T387	467.247	386.691	Glu-Tyr-Arg	[M+H]+			Organic acids and derivatives	Carboxylic acids and derivatives	Amino acids, peptides, and analogues	48992.1	8143.11	45255.1	61173.2	44167	49158.4	57576.9	52436.3	41941	43501.3	43691	39520.7	48689	57203.1	61500.1	67814.5	52127.8	54195.4	57195.1	48910.1	47564.8	55775	50471.5	62528.8	32301	35674.2	39367.2	39314.5
M83T128	83.0486	128.454	Glutaraldehyde	[M+H-H2O]+	HMDB0029599	C12518	Organic oxygen compounds	Organooxygen compounds	Carbonyl compounds	23233.7	17959.8	19973.4	21840.3	23750	21402.5	20927.1	23612.1	18968.6	23897.9	23875.1	10358.7	19207.6	25715.1	10851.9	16690.3	16064.2	20724.7	28667.6	241934	58921.1	25479.5	16502.9	59479.4	24203.5	23817.4	24217.3	22102
M191T414	191.066	414.25	Gly-Asp	[M+H]+			Organic acids and derivatives	Carboxylic acids and derivatives	Amino acids, peptides, and analogues	4240.13	5969.4	5551.02	4009.5	7283.22	5561.79	6943.67	4359.35	6048.43	8451.98	5879.43	5416.37	6620.63	6260.37	6722.07	6985.32	5784.54	9066.81	10312.9	5207.24	2504.12	14044.5	13573.7	18297.7	4693.82	5900.83	5939	5907.46
M186T59	186.09	58.962	Gly-Gln	(M+H-H2O)+						25739.7	271792	171107	273246	151491	194645	3711.19	211932	7090.55	202128	204390	135164	326437	274985	116130	186239	190180	221242	21799.1	122824	208112	27100.3	3783.49	181865	48865.2	163681	163758	163938
M205T415	205.083	414.627	Gly-Glu	[M+H]+			Organic acids and derivatives	Carboxylic acids and derivatives	Amino acids, peptides, and analogues	46690.1	48318.9	47759.2	46104.9	49675	56792	57572.7	58815.7	48883.7	59440.1	48398	55930.2	47303.4	55867.9	49302.5	51269.2	55216.4	25611.3	72440.5	64349.2	71471.2	69978.5	65060.9	68791	66429.2	67042.2	66595.1	67318
M261T406	261.143	405.857	Gly-Gly-Lys	[M+H]+			Organic acids and derivatives	Carboxylic acids and derivatives	Amino acids, peptides, and analogues	89651.8	117364	86592.7	98916	213215	206659	182247	90569.5	125150	85765.9	224648	67138.8	80951.6	90025.9	102522	49284.8	52654.6	80900.3	82401.2	76194.6	93895.6	69811.1	82909.1	81688.1	137065	110525	117248	107840
M173T255_2	173.138	254.659	Gly-Leu-Arg	[M+2H]2+			Organic acids and derivatives	Carboxylic acids and derivatives	Amino acids, peptides, and analogues	10835.4	7855.79	9569.25	11815.3	7618.84	7704.5	13454.7	8205.64	8546.65	10753.6	10176.5	11295.2	8301.59	11461.4	10858.1	11699.9	9208.7	17925.6	12387.2	9169.47	11735.2	11435.8	12502.7	9998.99	16153.9	16153.5	16738.7	16334.9
M204T454	204.133	454.333	Gly-Lys	[M+H]+			Organic acids and derivatives	Carboxylic acids and derivatives	Amino acids, peptides, and analogues	23630.4	34815	21932.2	12637.3	17759.4	37154.7	30251.4	36807.8	10179.7	27648.6	15991.3	36235.4	14025.6	30763	19283.3	10506.5	12960.2	71290.7	15313.7	61238.1	32823.8	26004.8	36709.3	41892.5	40343.7	38617.4	40342.9	38683.1
M190T82	190.097	82.1875	Gly-Phe-Arg	[M+2H]2+			Organic acids and derivatives	Carboxylic acids and derivatives	Amino acids, peptides, and analogues	174062	115610	131155	182780	152816	218042	151298	223459	61082.4	273242	169025	133330	253616	255897	83027.7	122268	69859.4	101888	181076	77921.2	192218	216713	272146	116921	135465	152436	204082	144166
M291T414	291.154	413.705	Gly-Ser-Lys	[M+H]+			Organic acids and derivatives	Carboxylic acids and derivatives	Amino acids, peptides, and analogues	78778	83885.4	67395.7	64070.2	42434.2	43588	39279.7	113881	39056	42076.1	41612.6	36639.4	52288.3	83102.2	53668.9	66937.5	84769.4	115118	137206	75731.1	53454.8	82074.2	66646.5	58031.2	80007.1	79970.3	80426.2	101297
M390T423	390.229	422.709	Gly-Trp-Lys	[M+H]+			Organic acids and derivatives	Carboxylic acids and derivatives	Amino acids, peptides, and analogues	5995.66	29642.8	12267.3	10972.2	32744.8	31625.7	31319.1	29180.5	31031.3	32179.9	32752.5	31462.3	27999.3	41266.1	34399.3	30244.4	29496.7	42367.9	38490.9	35465.9	26826.7	21708.8	10335.3	9590.89	38797	39013.5	38788.1	37951.4
M175T205	175.107	204.979	Gly-Val	(M+H)+						14923.8	15155.1	19875.2	6133.68	11700.8	18266.3	8919	4915	11516.5	17367.5	2508.22	14339.8	8865.95	8050.83	12679.5	5664.74	7744.23	16073.3	21115.3	13915.9	6719.11	29520.2	17172.1	4258.78	17145.6	22007.4	22091.2	22032.1
M303T407	303.2	406.754	Gly-Val-Lys	[M+H]+			Organic acids and derivatives	Carboxylic acids and derivatives	Amino acids, peptides, and analogues	15385.3	21838.8	21344.7	42140.7	29436.4	28069	27759.8	28702.8	51701	52354.7	52465.6	32731	51581	36394.7	27162.5	28403.2	33611.3	37973.5	21715.2	50298.9	33727.3	26869	24499.6	43473.6	25181.6	28142.3	26755.1	25112.1
M488T584	488.392	584.342	Glycerol tricaprylate	[M+NH4]+	HMDB0011187	C13044	Lipids and lipid-like molecules	Glycerolipids	Triradylcglycerols	2150.33	2139.81	2413.89	2234.44	1927.77	2351.81	2239.9	2136.34	2293.49	2457.2	2211.36	2134.51	1747.73	2065.12	2158.41	2152.28	2322.1	2024.71	2258.9	2255.26	2317.62	2365.39	1977.05	2156.32	2172.53	2188.1	2236.39	2254.09
M104T264_2	104.107	263.793	Glycerophosphocholine	[M+H-C3H7O5P]+	HMDB0000086	C00670	Lipids and lipid-like molecules	Glycerophospholipids	Glycerophosphocholines	2.96676e+06	3.34828e+06	4.63508e+06	4.84337e+06	3.27152e+06	3.78091e+06	2.8015e+06	2.15405e+06	842227	2.20683e+06	1.54663e+06	2.74541e+06	3.15808e+06	3.77356e+06	3.88023e+06	2.98382e+06	3.65144e+06	5.07935e+06	3.14851e+06	4.95619e+06	1.85548e+06	3.97292e+06	4.89348e+06	5.80858e+06	3.62741e+06	3.75037e+06	3.62735e+06	3.64531e+06
M472T308	472.322	307.765	Glycochenodeoxycholate	[M+Na]+	HMDB0000637	C05466	Lipids and lipid-like molecules	Steroids and steroid derivatives	Bile acids, alcohols and derivatives	11053.7	4867.7	13274.4	9965.29	11399.1	5338.6	12958	13691.8	10911	5287.29	12801.1	10192.6	7812.17	11420	19460	13372.3	11456.9	20527.2	14596.1	11976	9027.46	12540.9	10357.6	11507	10241.3	11013.1	10255.7	11541.3
M488T383	488.304	382.712	Glycocholate	[M+Na]+	HMDB0000138	C01921	Lipids and lipid-like molecules	Steroids and steroid derivatives	Bile acids, alcohols and derivatives	18001.4	15077.3	8684.66	19121.2	17943.1	14626.5	16993.8	31662	13474.6	22463.4	17093.6	10604.8	16271.3	20198.1	18999.5	22916.3	15414.4	35344	20570.3	24855	15475.4	78399.1	70006.5	91993.5	24031.5	24101.2	22920.3	19733.1
M519T354	519.177	353.529	Gomisin c	[M+H-H2O]+		C10881	Phenylpropanoids and polyketides	Tannins	Hydrolyzable tannins	30187.5	12516.8	40918	63752.5	20724.6	25164	20585.6	23672.6	21663.8	22536.9	24278.3	25370.2	31808.2	83141	23983.5	6077.39	29838.2	38426.1	166809	43843.6	12913.8	65590.3	20661.5	76204.6	54156.4	50344.8	49170	44374.2
M481T439	481.113	439.029	Gossypin	[M+H]+		C10051	Phenylpropanoids and polyketides	Flavonoids	Flavonoid glycosides	4519.95	6346.8	8675.22	4439.1	3234.1	8330.08	4548.78	3325.1	3189.27	13639.3	5138.65	19895.6	4308.68	4798.19	5475.18	4301.38	2829.72	8919.79	4921.4	4712.99	4533.72	13823.4	11955.8	16004	9659.27	9781.99	9310.18	9779.43
M130T630	130.064	630.209	Gramine	[M+H-C2H7N]+	HMDB0035762	C08304	Organoheterocyclic compounds	Indoles and derivatives	Indoles	51388.1	44614.2	55036.5	45681.6	12505.4	48798.5	46319.7	38887.5	50616.8	41441.2	49315.4	45249.3	45232.1	45687.3	45022.2	37524	7813.89	45736.8	49658.9	50601.8	40492.1	41666.5	39250.8	46069.8	50673.1	50689.3	51457.2	53204.6
M625T344	625.231	344.226	Grossamide or its isomer (not validated)	[M+H]+						38867.5	15507	18055.4	14942.9	13092.5	17352.7	17953.3	12226	32274.9	11572.4	13537.9	13403.2	13604.9	13363.5	12880.9	13385.4	13017.8	11889.3	13317.6	21969.7	16689	14096.3	15781.7	19752.8	15065.8	15080.7	11289.5	15000.8
M388T286	388.209	286.067	Guan-fu base y	[M+H]+			Lipids and lipid-like molecules	Prenol lipids	Diterpenoids	49840.6	38561.6	57497.5	59342.4	63977.2	58213.5	48853.7	46694.3	45315.2	34248.2	43276.5	48958.3	46209.1	56686.9	58412	45309.9	65592.4	63689	57777	47883	49723.3	42677	52357.9	38229.4	63500.2	63502.9	63483.1	68643.2
M60T628	60.0442	628.275	Guanidine	[M+H]+	HMDB0001842	C17349	Organic nitrogen compounds	Organonitrogen compounds	Guanidines	64062.9	62289.4	141182	57023.5	89782.9	24710.3	58594.9	58099.1	61054.2	58232.3	63046.5	60706.4	61336.1	58212.7	13804.9	54473.3	57141.5	60079.1	15272	82917.2	56285.2	58103.5	12737.8	59272.9	66133.6	65903.8	65941.7	91383.1
M152T218_2	152.056	218.34	Guanine	[M+H]+	HMDB0000132	C00242	Organoheterocyclic compounds	Imidazopyrimidines	Purines and purine derivatives	315013	453089	267739	279194	486052	415392	279266	315422	278878	226621	276242	228668	251034	353199	268217	192429	258948	336400	256606	418334	164537	457113	412071	413281	376431	382781	378386	376423
M266T232	266.087	232.204	Guanosine	(M+H-H2O)+	HMDB0000133	C00387	Nucleosides, nucleotides, and analogues	Purine nucleosides		66034.2	87772.1	60868.9	68989.8	49678.7	62465.1	60823	61873.1	46097.5	64203.9	49638.5	57096.9	49959.1	73642.2	79073.2	58816.2	65092.4	79360	87497.9	78589.1	59411.5	80423.7	71777.6	70143.6	80658.2	91251.1	80639.6	80714.2
M183T43	183.1	43.3045	Harmane	[M+H]+	HMDB0035196	C09209				706369	931589	954421	1.64316e+06	461132	796504	666152	748100	1.00509e+06	782099	482324	212820	607619	635876	380483	864282	459804	849359	669018	975819	627044	589819	647360	1.635e+06	910724	715830	1.01738e+06	1.20767e+06
M213T246	213.123	245.746	Harmine	[M+H]+	HMDB0030311	C06538	Alkaloids and derivatives	Harmala alkaloids		125473	114138	127677	266454	111443	203411	203461	211842	192094	115916	118158	125152	192867	304294	244985	226568	122040	134514	337361	112753	235642	140614	140239	109904	270845	190397	270842	270615
M532T323	532.266	322.943	Harringtonine	[M+H]+		C10597				48127.6	46933	90735.2	73787.3	71710.5	66090.5	54582.7	62825	44368.2	58167.4	59310.3	40810.3	67593.4	78117.7	85121.9	51712.7	118899	82215.5	69838.3	55657.8	49838.5	50175	49262.6	51692.5	52214	51474.2	50004.9	48850
M419T186	419.223	186.018	Hc toxin	[M+H-H2O]+		C15676	Organic acids and derivatives	Carboxylic acids and derivatives	Amino acids, peptides, and analogues	152242	116190	221852	181996	131194	141450	201868	117901	103965	161245	132952	184118	103101	181444	150162	173093	236396	312831	168986	198930	128620	109246	230592	167986	258369	233862	233690	233790
M314T283	314.178	282.553	Heliotrine	[M+H]+		C10324				93781.9	110744	78137.6	119471	78390.1	79157.7	70327.5	82386.2	91133.6	73489	88861.1	72891.2	90599.3	67550.4	83470.5	111787	84311.4	109779	98483	76799.2	68316.9	71795.1	79178.8	67575	104328	81143.4	101358	101282
M599T243	599.284	243.124	Hematoporphyrin	[M+H]+						14477.2	22302.7	26007.6	22812.8	17361.7	18839.4	22964.4	23666.1	29147.6	28245.2	21728.2	23853.3	13295.5	23579.2	26667	28658.8	11373.7	24002.7	22583	24939.5	11747.8	26060.5	17302.2	16751.2	18128.1	20613.6	19740.8	20563.6
M288T39	288.289	39.16	Heptadecasphinganine	[M+H]+			Organic nitrogen compounds	Organonitrogen compounds	Amines	2.12737e+06	3.83888e+06	2.0325e+06	1.83476e+06	3.71386e+06	3.27351e+06	3.625e+06	3.13779e+06	2.76052e+06	3.72681e+06	2.21489e+06	3.45705e+06	3.29036e+06	2.11835e+06	3.29133e+06	2.93738e+06	3.22169e+06	2.90461e+06	2.04728e+06	3.91657e+06	3.70604e+06	2.09012e+06	3.35241e+06	2.95499e+06	4.00324e+06	3.91719e+06	3.89718e+06	3.89701e+06
M627T326	627.15	325.666	Herbacetin-3,8-diglucopyranoside	[M+H]+			Phenylpropanoids and polyketides	Flavonoids	Flavonoid glycosides	6243.96	10220.9	21544.9	7550.23	15994.6	15261.1	7801.31	19948.2	3526.19	52210.3	6536.36	17488.7	1764.3	18201.3	15211	5538.66	14384	26790.5	31916	12333	10432.9	48044.4	12926.4	48603.6	19931.5	20214	22373.1	19941.7
M370T240_2	370.169	240.325	Heroin	[M+H]+		C06534				43217.1	34924.5	44166	55595.2	34688.7	50823.9	47738.6	38821.9	54201.3	17486.6	51763.9	64346.3	52609	46767.8	17188	50685	51623.9	45665.2	55798.2	49890.1	90189	44094.2	44344.1	44367	52480.4	52482.2	52441.7	48086.7
M598T348	598.368	348.169	Hexanamide, n-[(1s,2r,3e)-2-hydroxy-1-(hydroxymethyl)-3-heptadecen-1-yl]-6-[(7-nitro-2,1,3-benzoxadiazol-4-yl)amino]-	[M+Na]+			Lipids and lipid-like molecules	Sphingolipids	Ceramides	7869.59	10459.6	9210.72	8524.87	7942.36	8278.23	7755.46	8260.86	5960.46	5049.36	7472.88	8986.8	7693.25	7297.93	8206.91	6092.97	8303.47	9378.53	8727.7	9439.29	7066.63	5250.89	9284.74	6106.2	8917.22	8463.71	8287.08	8298.1
M237T296	237.122	295.871	Hexobarbital	[M+H]+	HMDB0015444	C11723	Organoheterocyclic compounds	Diazines	Pyrimidines and pyrimidine derivatives	70209.1	96894.1	70957.9	72556.8	67904.2	79324.6	92286.2	63754.9	55639.6	63973.3	72540.2	68413.4	59616.3	65874.2	117938	184362	63986.4	72059.1	71251.5	65743.3	101370	66489.6	69525	65022.4	88281.4	90316.2	91844.8	90798.2
M640T216	640.335	216.032	Hexosyl lpe 18:2	[M+H]+			Organic oxygen compounds	Organooxygen compounds	Carbohydrates and carbohydrate conjugates	18107.9	20330	38054.1	17581.9	18059.5	10724.2	13037.8	11677.2	22020.5	16249.4	19684.4	14197.3	12848.2	15832.1	10411.7	24113.5	9478.11	21484.6	21981.4	15104.9	16363.3	15105.6	13153.8	24746.7	17746.8	20826.9	20868.7	20860.3
M392T448	392.176	447.943	Hexylglutathione	[M+H]+		C02886	Organic acids and derivatives	Carboxylic acids and derivatives	Amino acids, peptides, and analogues	70721.5	27525.4	160008	36356.8	36044.4	42824.8	21297.9	39326.8	58022.1	79156.7	143393	27627.8	103154	110203	48755.4	103188	149952	83990.7	50278.4	50509	56959.4	41804.9	47845.8	99043.4	71481.5	73822.1	74796.4	60246.2
M346T203	346.271	202.593	Himbacine	[M+H]+		C10598				41136.6	43235.5	38957.4	49410.6	26646.5	36429.6	46608.7	22758.6	31788.4	20247	45719.9	44037	27336	36878.7	45071.6	32840.4	34436	48154.4	39604.5	23998.3	28624.8	29699.6	38138.3	26342.5	59359.2	59289.7	57589.6	51588.1
M369T412	369.2	412.275	Hirsutine	[M+H]+		C16972				37749.7	103293	43409.5	56840.8	124082	89155.3	80653.4	35551.6	95476.3	39162	103330	93300.8	53928.1	36620.5	64131.4	46400.4	39354.4	37375.5	20373.7	31167.6	62226.3	38557.9	24832.5	38888.5	62641	64101.3	58364.5	64101
M209T181	209.102	181.209	His-Ala	(M+H-H2O)+						57714.6	47954.5	43887.6	31383.4	35734.3	31052.9	59998	66397.5	46570.2	32717.7	26615.1	45324.2	48837.6	45849.8	40608.8	41242.9	63271.8	138987	80238	71811.7	50332	45966.8	67530	29862.8	77798.3	52593.2	77591.8	75783.3
M284T300	284.148	300.342	His-Gln	[M+H]+			Organic acids and derivatives	Carboxylic acids and derivatives	Amino acids, peptides, and analogues	38592.3	45678.9	41750.2	85190.5	46248.8	33889.2	68648.4	43895.7	41439.1	26331.8	53172.9	44495.1	56228.2	27071.6	44718.1	47877.9	47465	39799.1	50112.9	32072.7	88093.8	47213.2	58601.7	43998.1	102094	99074.3	105047	99076.4
M185T176	185.128	175.564	His-Gly-Arg	[M+2H]2+			Organic acids and derivatives	Carboxylic acids and derivatives	Amino acids, peptides, and analogues	49433.6	56573.5	51818.3	56644.1	40861.9	56418.9	52902.8	54300.7	38418.1	56318.6	47099.5	44692.8	32231.2	68019.5	51064.6	42041.4	43183.9	57800.2	54860.6	45058.6	54263.2	68466	55358.9	25720.4	57880.8	56951.7	56236.4	57883.9
M257T293	257.112	293.099	His-His	(M+H-2H2O)+						81012.5	45646.6	84879.3	14575.8	21288.7	72611.9	75391.3	19589	401.7	49631.2	90535.1	12256.3	65284.4	56341.4	16769.1	85263.3	81861.8	73142.2	29164.2	67372.7	15458.1	82573	59977.2	43767.4	50002.1	56238.6	56182.1	48476.4
M269T346	269.148	346.231	His-Leu	[M+H]+		C05010	Organic acids and derivatives	Carboxylic acids and derivatives	Amino acids, peptides, and analogues	157999	106076	68792.5	155219	162494	179247	69861.3	277274	132190	56276.2	89177.8	71438.4	73448.7	231934	154609	110242	189426	119820	172715	142389	292485	142855	270995	139741	105561	101225	94168.1	106272
M284T356	284.098	356.114	His-Lys	[M+H]+	HMDB0000133	C00387				32163.7	37229.2	41675.3	53010.2	44991.9	11912.9	44469.6	24942.5	15131.6	54806.1	45215.4	32359.8	1774.26	24488.3	43538.5	50967.9	41617.9	47660.2	71825.8	40579.9	12291.6	47556.2	27534.5	36396.4	33640.8	36664.6	40874.4	35341.1
M303T216_1	303.142	215.6	His-Phe	[M+H]+			Organic acids and derivatives	Carboxylic acids and derivatives	Amino acids, peptides, and analogues	58159.8	50654.6	55517.7	73579.3	62272.3	54641.7	63972.5	63995.9	55430.4	61282.6	51079.2	66256.5	64554.4	62393.8	63508.4	63124.1	50856.5	56571.7	20937.5	59572.8	58328.9	53252.3	43412.5	56805.6	43074.9	55312.8	51922.6	55976.6
M235T135_2	235.118	134.941	His-Pro	(M+H-H2O)+						464143	589376	563215	528583	415143	601646	197119	304865	183908	462620	283739	392408	218074	495870	324923	205326	526828	526158	1.30111e+06	429999	351039	991784	709435	903429	473123	472171	473081	385156
M257T245	257.125	245.13	His-Thr	(M+H)+						9173.47	30095	31829.6	39904.6	27524.7	32459.8	32175.6	26732.9	27924.9	27242.1	30196.9	34414.2	23039.8	24758.9	31022.8	30815.7	31712.9	10786.8	26583.4	35204.6	30096.9	23306.6	30746.4	23958.6	34457.9	36714.3	37286.3	37293.5
M255T389	255.133	388.732	His-Val	[M+H]+			Organic acids and derivatives	Carboxylic acids and derivatives	Amino acids, peptides, and analogues	131391	206602	225154	130654	181518	229214	188280	169688	205878	152483	221469	179997	154695	108339	170593	153170	132535	111381	194420	160075	189325	110716	116646	146037	173813	180072	175858	173773
M112T434	112.086	433.605	Histamine	[M+H]+	HMDB0060263	C00388	Organic nitrogen compounds	Organonitrogen compounds	Amines	883975	522371	344277	260490	293493	193685	714829	1.07191e+06	516848	766179	544189	816811	517009	1.51418e+06	1.1587e+06	760966	236292	873646	712381	995865	2.69416e+06	1.09758e+06	983690	733355	901975	932357	968659	1.03095e+06
M156T449	156.076	449.463	Histidine	[M+H]+	HMDB0000177	C00135	Organic acids and derivatives	Carboxylic acids and derivatives	Amino acids, peptides, and analogues	133515	67362.7	51615.6	114138	115615	150759	162600	281658	118208	269045	134432	43283.4	111618	333025	131509	112892	145373	292890	140750	179507	113703	145164	135028	92473.9	222754	214589	219960	222728
M771T488	771.384	487.882	Hoiamide c	[M+H]+			Organic acids and derivatives	Carboxylic acids and derivatives	Amino acids, peptides, and analogues	7007.06	5580.36	6034.83	16504.3	7571.69	11616.4	11191.8	19760.6	5838.64	9938.91	6436.44	13990	6449.46	9498.26	6670.97	5763.24	9051.71	13746.7	8445.82	8248.62	10053.9	12113.1	14242.3	16307.8	19059.9	16666.8	17001.3	19040.3
M546T354	546.288	354.098	Homoharringtonine	[M+H]+						19405.7	23059.2	23181.3	39082.5	28300.2	29340.4	30273.7	40500.1	13459.8	27549.7	22837	24532.2	16402.4	24920.9	29458.3	25031.6	14407.7	40118.1	30024.2	42650.5	26851.6	46491.1	35745.8	38330.2	28888.5	27237.9	28957.7	21913.9
M257T398	257.148	398.198	Huperzine b	[M+H]+		C09866				53319	106658	83554.4	109199	140591	131432	118903	83976.9	130541	67020.3	137378	122925	106263	57227.3	109158	96303.2	87089.8	50757.1	79617	72234	106704	53103.6	75636.9	78381.3	101046	100761	100586	102286
M309T337_2	309.179	336.8	Hydrocortisone	[M+H-3H2O]+	HMDB0000063	C00735	Lipids and lipid-like molecules	Steroids and steroid derivatives	Hydroxysteroids	89627	95016.6	91806.9	109277	116471	302279	85727.4	120936	99281.2	83315.4	124358	169646	100792	135101	96172.2	222323	238299	101768	96207.1	90919.5	121702	111636	130163	74308.5	215526	113330	110555	113119
M405T200_1	405.208	199.625	hydrocortisone 21-acetate	[M+H]+		C02821	Lipids and lipid-like molecules	Steroids and steroid derivatives	Pregnane steroids	79923.8	68450.8	80105.5	122396	85658.4	78623.2	111068	59184.9	72276.1	56491.9	68941.6	89813.6	86357.8	93319.1	141443	107860	110680	155650	116902	93084.5	62488	66056.1	87616.8	75436	158138	153953	158163	143225
M222T334	222.112	334.355	Hydrocotarnine	[M+H]+	HMDB0033701	C00353				79530.8	71061.4	76336	93098	86281.9	94675.1	78390.4	56363.6	85112.3	64017.2	77128.5	83802.7	78052.4	57156.1	81288.6	66461.1	63481.8	53470.2	65969.2	67862.4	72917.6	63857.2	78624.6	59576.3	82780.2	83946	83945.8	83946.2
M571T296	571.271	296.228	Hydromorphone	[2M+H]+	HMDB0014472	C07042	Alkaloids and derivatives	Morphinans		28801.6	42833.2	21655.7	30105	15909.9	37139.8	71372.8	29934.2	23029.7	34390.7	25278.5	15077.1	21036	33722.8	27761.5	27375.1	32432.5	82125.5	46892.6	32409.7	15456	43876.1	13443.9	35201.7	56475.2	51361.8	55252.2	56511.2
M344T380_2	344.206	379.595	Hydroxybutorphanol	[M+H]+						29393.6	23300.5	23108.8	29362.9	22989.8	24765.9	31025.1	24757	13543	31338	29876.5	29022	16380.1	32517.6	25750.8	5446.29	6910.61	29647.9	25642.3	33025.3	8691.78	27476	26030.5	28099.8	31598.9	31418.7	31629.7	31174.2
M336T168_2	336.179	168.231	Hydroxychloroquine	[M+H]+	HMDB0015549	C07043	Organoheterocyclic compounds	Quinolines and derivatives	Aminoquinolines and derivatives	297430	222029	231683	240286	173367	169835	171682	158411	179494	165317	242276	186522	175894	260872	224117	153389	164606	173520	225978	195136	175984	203987	205390	137456	190416	192520	193185	193183
M219T213	219.122	212.817	Hydroxysebacic acid	[M+H]+	HMDB0000350		Organic acids and derivatives	Hydroxy acids and derivatives	Medium-chain hydroxy acids and derivatives	65641	59573.8	50647.4	40499.8	43479.8	113662	69418.2	62336.6	58416	70069.2	49516.5	89685.3	45941	52523.3	63636.4	43143.1	36404.1	73236.5	50404.3	35344.2	46347.7	73538.9	78549.5	37296.5	78808.4	79299.3	77921.7	79297.7
M137T161	137.046	161.437	Hypoxanthine	[M+H]+	HMDB0000157	C00262	Organoheterocyclic compounds	Imidazopyrimidines	Purines and purine derivatives	3.37289e+07	3.22652e+07	2.84213e+07	3.01694e+07	2.78927e+07	3.3781e+07	3.07589e+07	2.80292e+07	2.78906e+07	2.492e+07	3.09924e+07	2.40122e+07	3.13413e+07	3.26639e+07	2.49692e+07	2.66725e+07	3.56981e+07	3.54683e+07	3.25963e+07	3.80266e+07	2.62102e+07	3.04634e+07	3.56734e+07	3.06693e+07	3.82999e+07	3.80294e+07	3.80316e+07	3.83008e+07
M367T304	367.256	303.557	Ibutilide	[M+H-H2O]+	HMDB0014453	C07753	Benzenoids	Benzene and substituted derivatives	Phenylbutylamines	6017.96	8791.5	8264.86	5932.14	14277.9	11839.9	10893.4	8176.17	11144.4	6394.28	8840.28	11147.9	21263.5	3987.13	5404.65	7691.8	8879.87	5495.91	13156.8	7641.86	11521.3	4781.63	7801.73	9567.16	26743.7	14110.7	14339.9	14312.9
M699T147	699.224	146.743	Icariin	[M+Na]+		C17555	Phenylpropanoids and polyketides	Flavonoids	Flavonoid glycosides	17143.3	22095.9	22232.6	20868.8	23995.6	27264	12625.6	25581.3	18324.8	20850.7	19649.3	15899.5	15148	26484.4	23205.5	16627.1	16166.9	11992.7	21541.8	22024.2	18059.6	24675.9	19389.1	22224.4	17005	13945.8	13918.7	14599.6
M497T293_1	497.193	292.916	Icariside ii	[M+H-H2O]+			Phenylpropanoids and polyketides	Flavonoids	Flavonoid glycosides	31705.4	29049.3	32291.7	31993.1	35653.3	33122.6	45552.4	42023.1	26690.6	30638.4	53089.8	31193.7	39201.9	36944.6	33412.8	40438.5	51823.3	51594.6	40107.4	39891.5	31950.4	37203.7	35303.5	29154.9	65012.9	69639.1	70159.4	67183
M501T345	501.269	345.045	Ikarugamycin	[M+Na]+						206606	38337.4	135353	721677	398281	535567	314461	471346	193748	839171	419787	218463	644978	565025	360256	402545	491799	358426	277499	154595	413819	348121	523474	366509	550964	491990	489303	551034
M225T446	225.122	445.76	Ile-Ala	(M+Na)+						243963	170937	214105	263962	269679	255100	237714	204008	253402	199809	271744	188812	253793	208602	231147	237672	209319	216232	224049	234984	190390	173176	215805	181173	290817	291962	284919	291973
M359T353	359.238	352.696	Ile-Ala-Arg	(M+H)+						17713.7	22147.1	8789.03	31069.9	23959.6	21781	53122.6	102645	4029.8	64804.3	33931.3	62266.9	31060.2	25270.8	12067.2	32420.4	26954.1	184821	43927.1	90628.4	58051.3	93669.6	97508.1	112614	47136.9	53033.3	47230.7	49715.8
M288T329	288.202	329.352	Ile-Arg	[M+H]+			Organic acids and derivatives	Carboxylic acids and derivatives	Amino acids, peptides, and analogues	36789.8	76326.9	61876.3	157528	41875.6	72543.7	124541	254322	42330.2	165494	41250.7	133405	38882	108811	67066.3	58216.7	63299.4	522351	212911	127258	135653	207395	98478.4	225945	147440	147440	145441	147332
M416T516	416.295	515.785	Ile-Arg-Lys	[M+H]+			Organic acids and derivatives	Carboxylic acids and derivatives	Amino acids, peptides, and analogues	7934.12	15335.8	7412.17	12139.2	14813.4	15227.2	9639.23	31894.5	2983.04	23049.2	9485.18	14251.7	6194.7	17212.4	12863.8	5632.78	20270.4	69003.5	23589.4	28507.4	10275.8	26098.2	21060.5	44508.2	22587.8	29591.7	33616.9	31796.2
M402T390	402.242	389.938	Ile-Asn-Arg	[M+H]+			Organic acids and derivatives	Carboxylic acids and derivatives	Amino acids, peptides, and analogues	61130.6	43718.3	54911.2	58219.6	45195.3	45471.8	49930.2	28938.6	47795	9965.68	43835.2	41255.2	53743.8	54221	53677.9	64180.1	58215.7	58918.2	49649.1	22461	10601.1	13492.7	11874.7	53210.8	26652.1	33560.3	33609.6	25458
M261T354	261.143	354.027	Ile-Glu	[M+H]+			Organic acids and derivatives	Carboxylic acids and derivatives	Amino acids, peptides, and analogues	156341	101740	138720	201670	103528	116368	217567	243317	46910.4	149547	133577	239298	47286	208249	145486	99689.3	132643	240468	248071	213589	237294	232046	247821	230384	170931	202554	202461	202350
M417T400	417.242	400.338	Ile-Glu-Arg	[M+H]+			Organic acids and derivatives	Carboxylic acids and derivatives	Amino acids, peptides, and analogues	25245.2	16911.2	7158.91	38989.2	33549.7	21005.9	25384.2	27192.6	29267.5	18168.1	5301.19	11904	12663.1	42857.4	17447.9	32826.6	36852.6	49927.1	17010.1	42021.3	17895.6	34337.3	33983.4	46605.1	28732.5	22273.9	22571.7	22097.3
M245T271_2	245.185	271.356	Ile-Ile	(M+H)+						6500.09	8220.08	10397.3	11037.5	11551.2	10300.7	9956.66	8502.07	8765.84	11564.9	9047.96	14254.7	8383.98	13152.7	17870.8	9303.78	10286	11127.4	6431.19	9062.9	9680.89	10022.8	8992.49	11492.7	9439.74	12581.8	9566.26	9807.75
M373T296	373.279	295.983	Ile-Ile-Lys	[M+H]+			Organic acids and derivatives	Carboxylic acids and derivatives	Amino acids, peptides, and analogues	59438.4	54305.8	46553.7	64775.3	57886.7	27325.2	40295.4	118960	7758.86	68588.9	29069.7	61411.3	23688.9	51227.4	23006.5	17363.6	98473	192116	57094.3	92877	45497.7	60544.9	77509.8	155269	78505.7	82035.6	70477.4	80482
M401T285	401.285	284.839	Ile-Leu-Arg	[M+H]+			Organic acids and derivatives	Carboxylic acids and derivatives	Amino acids, peptides, and analogues	12884	19193.9	11551.7	51894.2	21902.6	14275.5	27351.5	59444.1	13106.4	38463.3	3338.57	64146	7741.72	15614.1	5735.21	14932.2	27488.4	333896	75899.3	55226	59040.1	36918.1	92541.7	218682	79752.8	63070.1	79679.4	79622.9
M187T479	187.144	478.938	Ile-Leu-Lys	[M+2H]2+			Organic acids and derivatives	Carboxylic acids and derivatives	Amino acids, peptides, and analogues	220646	171627	200064	262782	226720	183272	204649	179299	236307	148663	221493	190459	225495	212517	231200	204697	239391	277915	192238	208233	203435	135409	217342	170643	317836	322636	320837	320035
M261T324	261.154	324.167	Ile-Phe	(M+H-H2O)+						10550.4	22697.2	10831.8	28633.9	23021.4	14328.7	22183.6	24223.3	22618.7	23282	16425.1	21626.2	21435.6	28400.3	20714.9	21561.1	23899.3	26959.1	30479.5	25128.6	9549.07	27439.5	23626.8	22954.7	23805.1	23409.6	24006.3	23550.4
M435T404	435.281	404.175	Ile-Phe-Arg	[M+H]+			Organic acids and derivatives	Carboxylic acids and derivatives	Amino acids, peptides, and analogues	51682.6	37147.2	37899.5	38551.8	6579.34	16104.9	33905.8	39208.8	35172	33829	9266.74	36623.3	16901.1	48070.9	43345.6	16045.4	52037.3	74127.5	51656.6	55310	38431.4	43053.6	47498.3	36684.3	45865.8	45878.7	38089.9	45887.1
M407T307	407.251	307.045	Ile-Phe-Lys	[M+H]+			Organic acids and derivatives	Carboxylic acids and derivatives	Amino acids, peptides, and analogues	16600.6	13884.2	14662.2	20492.9	17511.6	15153.7	12099	16632	17641.3	8137.26	22124.5	11349.2	15434.8	21136.7	15055.8	16729.7	18890.5	24446.7	11677.2	9913.15	19432.5	10141.6	18108.4	12192.6	23036.2	23006.3	22986.1	20285
M260T281	260.159	280.873	Ile-Ser	(M+CH3CN+H)+						30726.7	81276.7	72451.8	101761	35140.7	45253.6	144340	121366	26705.3	51841.6	44191.5	104263	22694.4	62354.6	37739.1	25042.7	41648	384762	134992	205211	54483.7	92110.6	146653	155542	157034	121615	121847	121668
M174T71	174.111	71.0905	Ile-Ser-Lys	[M+2H]2+			Organic acids and derivatives	Carboxylic acids and derivatives	Amino acids, peptides, and analogues	104961	95277.4	75163.6	69069.7	73748.5	88995.3	75219.6	81260.6	65085.5	150744	84246.2	41771.2	79057.9	86784.1	68064.9	80696	72043.8	93848.7	73601.1	62290.7	108949	87176.4	84027.7	59807	100296	102336	104273	95625.4
M317T302	317.18	301.693	Ile-Trp	M+						21101.2	14541.8	20283.1	34506.5	13055.3	20207.7	30318.4	35353.5	34961.9	30691.9	27852.6	30956.1	32456.3	53530.9	11416.5	37185.9	49917.5	83517.1	36548	49209.5	22199.4	90807	44236.5	54980.3	54286.3	54262.7	52746.6	52750.1
M446T244	446.273	244.349	Ile-Trp-Lys	[M+H]+			Organic acids and derivatives	Carboxylic acids and derivatives	Amino acids, peptides, and analogues	145471	154914	102876	128000	119510	106187	124234	88563.1	106724	96723.5	159435	134219	102901	157965	132671	122813	144046	114028	125684	129440	105933	110178	117994	153960	147399	135659	139402	135746
M359T72_2	359.277	71.678	Ile-Val-Lys	[M+H]+			Organic acids and derivatives	Carboxylic acids and derivatives	Amino acids, peptides, and analogues	107862	54341	53623.1	62992.1	52355.3	64453.4	55259.4	61536.4	51840.9	53266.6	63822.6	32016	51944.6	59582.6	39981.9	74290.1	109533	65319.9	64262.4	39507.2	53386.5	43200.6	53680.6	86635.9	67890.2	66980.5	65834.4	66805.7
M306T386	306.153	386.249	Imazamox	[M+H]+		C18598	Organic acids and derivatives	Carboxylic acids and derivatives	Amino acids, peptides, and analogues	111213	137709	141007	132163	149976	163444	153127	126181	154619	86020.6	176989	175025	157322	72850.9	142279	152813	133130	72915.5	106044	113892	158405	83702.7	115301	113979	133490	136326	134569	133482
M220T54	220.059	54.116	Imazapyr	[M+H-C3H6]+		C18864	Organic acids and derivatives	Carboxylic acids and derivatives	Amino acids, peptides, and analogues	65038.7	124196	41890	67100.7	49211	43889.9	41297.7	34165.8	102768	81235.7	39752.3	29733.4	27699.9	36372.8	20352.3	46197.5	34818.9	19601.1	23161.5	22912.5	33390	27239.6	29138.7	19632.9	32391.1	32418.4	28778	32403.3
M312T409	312.143	408.649	Imazaquin	[M+H]+		C05076	Organoheterocyclic compounds	Quinolines and derivatives	Quinoline carboxylic acids	21776.4	72551.4	51634.6	75305.4	84372.7	77308.4	68884.1	56055.7	83889.3	38843.5	84345.1	80324.4	68174.6	26922	66207.8	52951.5	52530.9	20073.9	42197.3	31311.6	61323.9	21063.3	52478.6	48724.4	61740.8	61901.1	67151.9	63434.2
M248T120	248.113	119.93	Imazethapyr	[M+H-C3H6]+		C18865	Organic acids and derivatives	Carboxylic acids and derivatives	Amino acids, peptides, and analogues	1.89714e+06	1.52511e+06	1.83512e+06	1.88624e+06	1.52893e+06	1.798e+06	1.75305e+06	1.94904e+06	1.83292e+06	2.15067e+06	1.92017e+06	1.53465e+06	1.79196e+06	1.7755e+06	1.40251e+06	1.6368e+06	1.92952e+06	2.28968e+06	2.19539e+06	1.28474e+06	1.84303e+06	2.06091e+06	1.87058e+06	1.32409e+06	2.02153e+06	1.97667e+06	2.0215e+06	2.01063e+06
M465T439_2	465.291	439.082	Indinavir	[M+H-C9H11NO]+	HMDB0014369	C07051	Organic acids and derivatives	Carboxylic acids and derivatives	Amino acids, peptides, and analogues	16365	9538.84	11544.5	10762.5	7391.95	10636.6	13066.5	14627.6	11372.6	11509.5	6121.28	3306.95	10710.2	18821.2	12819.1	18886.8	16258.5	28652.5	18134.2	15208.4	7009.32	10057.2	11639.2	7570.1	21250.3	19349.9	18388.4	15782.5
M118T131	118.064	130.739	Indole	[M+H]+	HMDB0000738	C00463	Organoheterocyclic compounds	Indoles and derivatives	Indoles	47210.8	50095.3	40828.2	25375.7	41000.8	33776.2	34553.4	30178.4	48522.6	43640.4	41950.4	21361.5	23041.7	30099.3	23112.8	27638.1	27717.3	27082.4	21239.1	33320.5	54030.4	21823	22259.4	27794	35540.8	34783.7	35543.1	35229.5
M162T328	162.054	327.605	Indole-2-carboxylic acid	(M+H)+						35823.7	31382.1	33571.3	58840.2	270625	41982.8	50609.2	38637.4	14300	55349.6	51676.5	28508.3	127724	25321.2	37994.2	50070.8	110097	87422.6	32561.9	44437	70394.7	37004.6	34754.9	34970.6	60066.7	60489.6	60355.6	90085.1
M175T130	175.086	130.096	Indole-3-acetamide	[M+H]+	HMDB0029739	C02693	Organoheterocyclic compounds	Indoles and derivatives	Indoles	169174	115878	95226.6	51288.9	76195.9	84251.8	83449.3	76239.5	113838	100640	92374.1	65090.3	63464.1	70618.5	61023.3	72778.2	55575.7	70412.9	100031	66732	62339.1	52248.5	104077	40290.6	72694.6	72274.8	73404.4	73405.2
M157T131	157.075	130.746	Indole-3-acetonitrile	[M+H]+	HMDB0006524	C02938	Organoheterocyclic compounds	Indoles and derivatives	Indoles	45776.2	45516.6	34201.9	22031.8	40526.8	35400.7	33196.6	30060.2	46919	31272.8	45680	24701.1	28345	33591.6	18836.7	24202.2	21873.3	21596.4	18077.6	29722.6	21641.7	14364.9	24214.9	26855.1	36584.1	33212.7	29755.2	35515
M289T298	289.175	298.192	Indole-3-acetyl-l-isoleucine	[M+H]+			Organic acids and derivatives	Carboxylic acids and derivatives	Amino acids, peptides, and analogues	33300.6	37706.5	21097.5	48076.1	48790.6	45277.7	45373.4	37300.9	43322.7	22261.8	27149.9	40982.9	40654.1	62962.1	43696.1	36311.3	49468.8	82656.7	82128.7	59139.6	33300.3	54231.9	31648.4	23250.9	65342.8	66630.2	56149.9	62928
M148T39	148.074	39.483	Indole-3-carbinol	[M+H]+	HMDB0005785		Organoheterocyclic compounds	Indoles and derivatives	Indoles	140331	36038.9	33940	65951.3	112846	71068.8	89299.3	138268	142334	143832	113626	75820.5	90985.6	113431	72503	133197	54903.9	82629.5	103907	62254	173435	61429	78627.6	64831.5	103334	103860	103317	110180
M118T204	118.064	204.222	Indole-3-carboxylic acid	[M+H-CO2]+	HMDB0003320	C19837	Organoheterocyclic compounds	Indoles and derivatives	Indolecarboxylic acids and derivatives	14818.1	19505.8	14224.1	10244.4	14053.9	13815.3	6506.24	17263	13523.2	17295.1	12854.8	27461.4	12439.2	13209.9	21401.4	11293.3	9862.47	21285.8	7170.89	27331.1	10556.5	14493.7	10519.6	8690.77	19230.1	19083.2	16662	19222.9
M206T64	206.117	64.128	Indolelactic acid	[M+H]+	HMDB0000671	C02043	Organoheterocyclic compounds	Indoles and derivatives	Indolyl carboxylic acids and derivatives	360733	372968	303306	277969	232891	582596	579169	719942	813239	332754	498376	175543	403564	498525	125762	184831	217303	617579	687678	324108	361684	647708	388247	491647	484250	437120	484261	475807
M331T181	331.171	181.114	Ingenol	[M+H-H2O]+		C09112	Lipids and lipid-like molecules	Prenol lipids	Diterpenoids	202937	144584	192892	239729	159123	186131	273969	155820	146011	168513	181349	251162	144325	251344	187869	253433	254030	154485	238297	202093	152906	194571	206078	149531	352034	353906	352839	358116
M334T465	334.16	464.687	Ipconazole	[M+H]+		C18471	Lipids and lipid-like molecules	Prenol lipids	Monoterpenoids	17425.5	16493.8	15265.3	19719.9	6950.88	16845.9	17806.9	14314.4	9305.07	9516.53	13668.2	7399.5	17835.1	17709.5	16167.9	14927.6	27237.6	30990.1	40964	15732.1	16450.6	21734.3	21022.3	12727.2	23266.5	26192.8	23274.4	23263.7
M332T273	332.219	272.906	Ipratropium	[M]+		C07052				21930	23000.5	23878.9	26453	22665.6	24904.2	46246.8	22542.1	23419.5	19610.6	23659.3	44571.7	22633.7	26734.9	37427.7	23128.2	22010	41576.1	29836.6	31552.6	22102.4	27085.6	23653.3	21629.4	45720.3	44695.9	43839	43859.6
M203T48	203.14	48.3225	Iprovalicarb	[M+H-C9H10]+		C18866	Benzenoids	Benzene and substituted derivatives	Toluenes	29382.9	31152.8	27014.3	39177.8	24068.4	34313.4	33138.3	37146.5	32654	36842.5	24692.7	22673.6	15422.8	37675.5	21534.6	26634.9	27359.7	31623.3	43888	25304	34549.9	43523.4	34355.4	37757.3	34460	37188	37197.2	36621.2
M653T88	653.333	88.139	Isohernandezine	[M+H]+						86352.1	65226.8	67858.6	112739	49104.9	65254.1	52615.9	70575.5	71514	36180.7	71430.1	139012	62347.3	114124	160139	45592.1	57624.5	29455.2	107004	111439	98827	65575.4	90518	37646	57196.1	72685.4	72696.6	72666
M429T333	429.22	332.638	Isomajdine	[M+H]+						33249	31917.1	32558.9	42072	38684.1	15837.2	37237.5	26362.5	26287.7	21493.4	21602.5	40580.4	40437.4	24465.6	34131.2	23155.2	21375.1	31568.9	30970.4	21678.5	38154.7	33846.2	33175	40787.6	25216	32196	32203.5	32205.3
M137T90	137.095	90.227	Isoprocarb	[M+H-C2H3NO]+	HMDB0031797	C18418	Benzenoids	Benzene and substituted derivatives	Cumenes	472844	265456	456664	671776	286255	358517	480760	521582	216730	419240	452982	374106	418703	650896	379477	325315	338017	667049	724800	144540	566222	339437	483948	341707	463534	562759	563585	560302
M292T446	292.155	445.618	Isopropalin	[M+H-H2O]+		C19063	Benzenoids	Benzene and substituted derivatives	Aniline and substituted anilines	44196.6	11919.1	40261.2	71766.9	20078.3	33603.1	9435.47	19439.2	54137.5	65353.3	9368.89	82974.7	17800.9	39715	49493.3	14095.4	33864	42173.7	78306	38610.6	28172.7	85916.5	34407.3	99293.8	44272	58493.1	58584.3	58499.1
M354T407	354.19	406.541	Isopropylcocaine	[M+Na]+			Benzenoids	Benzene and substituted derivatives	Benzoic acids and derivatives	106579	438738	301696	528133	566630	496340	418271	289768	491089	215538	494308	454866	413583	111775	413513	355748	340948	112487	247368	351807	437971	121092	402594	271256	365573	365591	358323	363264
M207T204_2	207.148	204.125	Isoproturon	[M+H]+		C11005	Benzenoids	Benzene and substituted derivatives	N-phenylureas	49458.4	53221.5	54361.5	47650.1	45154.8	50731.3	47878.7	43684.1	42065.1	43898.2	46128	43214.9	55275.8	54248.4	51648.9	41308.1	40532.7	59418.6	65038.9	41995.8	47745.1	70364.1	40189.8	25895.8	61739.8	59742.6	64677.2	59825.7
M180T255_2	180.101	255.2	Isosafrole	[M+NH4]+		C10472				268476	253592	252300	261944	178564	213165	298569	249939	177565	250285	239864	261144	195055	290886	289815	229103	201305	347648	293109	162139	268589	233928	252709	147086	312010	314786	325310	311982
M194T260	194.127	259.906	Isouron	[M+H-H2O]+		C18432				13045.1	9391.69	5028.39	10901.5	5700.59	5777.96	11481.7	8148.4	10998	10216.9	14244.7	11718.4	9234.93	11691.5	7042.24	7806.71	9302.77	6990.97	9595.43	9241.25	10996	10162.1	11288.4	6230.33	13816.9	13185.8	12982.2	13470.6
M250T227	250.092	226.805	Isoxadifen-ethyl	[M+H-C2H6O]+			Benzenoids	Benzene and substituted derivatives	Diphenylmethanes	277070	303005	298695	263190	275172	349104	228404	290913	262645	368065	262922	253259	298792	280259	273922	308120	263121	248390	292163	258649	286691	324343	269614	236914	262637	264976	269142	262657
M302T291	302.194	291.096	Isoxsuprine	[M+H]+			Benzenoids	Benzene and substituted derivatives	Phenylpropanes	11690.1	32552.7	24203.2	49288.9	45825.8	57806.5	31368.7	50835.4	43237.9	32029.6	63247.4	39873.4	26166.8	49846.5	42295.1	34403.4	74951.4	10588	51515.1	32442.4	50965.4	26948.2	56176.6	34866.7	44062.9	54547.7	54729.7	52670.4
M697T170	697.373	170.167	Izenamide c	[M+Na]+			Organic acids and derivatives	Peptidomimetics	Depsipeptides	13503.2	8702.59	10800.5	14034.9	9193.35	8492.6	14417.5	9011	7359.69	7712.04	9998.56	4957.79	8772.99	12633.5	9414.46	15092.9	14619.5	21839.4	14446	12171	8157.11	7221.82	11928	9118.19	14626.3	14585.2	14561.1	19660.3
M352T336	352.151	335.912	Jacobine	[M+H]+		C10339				58081.7	55679.2	58155.1	66073.9	56787.1	54269	55865.2	53911.7	55016.4	51493.4	19619.1	56797.1	54684.2	60454.3	56292.7	51007.3	59165.6	68044.4	63814.9	16350.1	55016.3	46762.4	60788.3	53081.1	62162.6	62414.9	58261.4	64874.3
M298T396	298.137	395.998	Janex 1	[M+H]+			Organoheterocyclic compounds	Diazanaphthalenes	Benzodiazines	72074.8	124340	80898.2	69919.4	159155	72391.1	65337.5	117946	136846	77380.9	132850	116855	62745.4	69265.8	97461.9	70707.1	59765	102540	60585.2	68752.1	101725	91566.9	80277.3	78260.1	97711.2	97807.3	109623	97721.4
M151T97	151.111	96.729	Jasmine lactone	(M+H-H2O)+						345696	220660	284084	311266	237864	344509	314981	253639	163287	418107	341787	75253.2	286121	321738	108939	176437	124359	230686	166710	83442.7	124825	250845	139867	257452	258443	254492	286260	296348
M426T204	426.282	204.425	Jervine	[M+H]+		C10811	Lipids and lipid-like molecules	Steroids and steroid derivatives	Steroidal alkaloids	26778	29336.2	58923.1	87245.1	62627.7	25488.2	118218	22562.2	59174.6	20762.7	27589.7	30292.1	22522.2	29145.6	66296.5	62973.6	43991.8	35032.7	34770.3	23068.6	19298.3	26293.8	28214.4	20452.2	45417.4	45399.1	45419.4	40711.5
M895T267	895.384	267.206	K-strophanthoside	[M+Na]+		C08881	Lipids and lipid-like molecules	Steroids and steroid derivatives	Steroid lactones	12581.3	6663.68	9014.9	11187.7	9790.75	8636.91	10213.7	17974	7922.56	6923.31	13386.6	9261.95	9771.55	10248.1	11266.7	10263.6	12097.7	12964.2	12826.4	9552.29	18958.1	6480.83	8082.14	7295.79	17838.9	18726.1	14286.6	18731
M378T324	378.261	323.734	Karakoline	[M+H]+		C08693	Lipids and lipid-like molecules	Prenol lipids	Diterpenoids	8832.91	24479	13783.8	19616.3	36773.2	29270.6	22901.1	15526.8	22988.8	15053.8	24300.9	29891.2	12881.2	11374.4	25247.6	13259.7	24831.2	12429.3	21222.7	16304.3	23012.1	10170.5	19697.5	15675.3	17868.7	17659.8	17663.6	17869.7
M131T180	131.069	179.791	Ketoleucine	[M+H]+	HMDB0000695	C00233	Organic acids and derivatives	Keto acids and derivatives	Short-chain keto acids and derivatives	47643	31263.8	38054.8	39106.8	18174	53896.2	47841.6	43938.3	25423.7	49752	40621.6	53883.8	33319.7	52044.3	40196.8	45711.5	57364.9	79431	49240.1	42055.2	49181.4	57473.4	73645.4	33832.2	81819.9	86883.2	86890.5	86326.5
M330T175	330.168	174.946	Kukoline	[M+H]+		C09643				118986	109978	120397	162208	118074	117138	196951	106219	111260	109527	125670	150621	93229.5	171643	189467	110055	169061	306269	181399	118596	121482	138780	163809	94216.7	288270	288230	300815	288273
M190T247	190.049	246.912	Kynurenic acid	[M+H]+	HMDB0000715	C01717	Organoheterocyclic compounds	Quinolines and derivatives	Quinoline carboxylic acids	137090	160709	301998	785963	111574	539980	330140	346141	82319.9	444344	99590.2	195417	667390	360128	403576	450341	406148	558726	582503	442114	222818	766420	498199	386832	538235	554997	543405	538340
M221T194	221.163	193.602	L-(-)-fucose, permethyl-	[M+H]+						42282.3	39785.7	23788.9	49051.4	27444.4	21789.3	49342.8	24762.6	34188.8	36578.5	37769.3	36141.9	36262.5	44342.1	55612.5	35541.4	36542.8	54940.1	15904.2	35740.3	40595.3	37740.6	46927.7	27263.5	53518.8	54175.2	53498.7	54171.5
M285T255	285.054	254.547	L-Abrine	(M-2H+3Na)+		C02983				1.68965e+06	1.40348e+06	932371	1.38599e+06	919847	1.02889e+06	954191	879150	917650	773116	968999	946218	966817	1.26411e+06	1.20698e+06	987788	1.3836e+06	1.30842e+06	1.63381e+06	1.02087e+06	938124	1.05048e+06	1.27516e+06	894048	1.47612e+06	1.47614e+06	1.47069e+06	1.46542e+06
M203T251	203.138	250.923	L-alanyl-l-norleucine	[M+H]+			Organic acids and derivatives	Carboxylic acids and derivatives	Amino acids, peptides, and analogues	45921.3	78148.9	49611.6	78225	57644.9	56268.9	82283.4	121347	45137.2	107517	46540.6	132485	45147.9	116986	62547.9	45854.8	55417.8	278368	163309	150448	60385.2	142927	102620	227364	123546	118403	99085.6	123551
M175T585	175.118	585.19	L-Arginine	(M+H)+	HMDB0000517	C00062	Organic acids and derivatives	Carboxylic acids and derivatives	"Amino acids, peptides, and analogues"	89892.2	267785	64918.6	94144.9	70143.9	112902	184080	110949	225091	319931	191857	78382	116033	205477	111714	67117.7	154383	475678	210724	112468	231463	119191	114571	51697.1	371821	404863	199457	401315
M189T84	189.123	84.32	L-arginine, methyl ester	[M+H]+			Organic acids and derivatives	Carboxylic acids and derivatives	Amino acids, peptides, and analogues	85382.5	77610.2	89673.3	97405.3	94806.6	81977	99786.4	57044.9	74968.6	39605.1	93533.9	73479.3	76515.9	65483.6	61963.7	38328.2	98256	40357.8	75215.7	62007.7	85245.6	86507.1	108955	70225	51906.7	81604	81274.8	81328.7
M435T186	435.196	185.935	L-arginine, n2-[2-(2,2-diphenylethoxy)acetyl]-	[M+Na]+			Benzenoids	Benzene and substituted derivatives	Diphenylmethanes	45896.3	38164.5	39027.2	45178	43369.3	29910.2	48210.3	22931.2	17355.3	26053.6	33024.6	56037.9	27126.5	42380.3	37331	48157.5	61658.3	59790.3	47819.5	47982.9	21413	15809.4	31946	28160.4	43071.8	36635.4	41480.7	43281
M134T398	134.044	397.85	L-aspartic acid	[M+H]+	HMDB0062186	C00049	Organic acids and derivatives	Carboxylic acids and derivatives	Amino acids, peptides, and analogues	13247.7	32084.5	12245.6	17812.1	13853.2	35567.1	33221.5	42530.1	13181.4	64335.4	12946.6	23916.9	7893.39	28279.6	8347.88	12699.6	18510	40312.6	62335.6	35144	22721.1	84664.3	25828	47891.2	40750.9	41224	40909.3	42451
M162T295_2	162.112	294.846	L-carnitine	[M+H]+	HMDB0062496	C00318	Organic nitrogen compounds	Organonitrogen compounds	Quaternary ammonium salts	707315	864253	1.04713e+06	642895	797707	726423	1.11487e+06	592009	1.01432e+06	379531	681144	675436	647375	888837	959735	860129	535922	690278	526753	704499	631242	564908	657133	542833	1.03989e+06	999786	991942	991659
M210T363	210.112	362.541	L-carnosine	[M+H-NH3]+	HMDB0000033	C00386	Organic acids and derivatives	Peptidomimetics	Hybrid peptides	306700	404484	379039	542198	417908	417408	356288	318723	413715	277318	476098	417923	436245	270170	433549	391697	440910	179864	371354	310875	365490	271914	385090	249333	394916	399530	398551	398030
M176T337	176.091	336.985	L-glutamic acid, dimethyl ester	[M+H]+			Organic acids and derivatives	Carboxylic acids and derivatives	Amino acids, peptides, and analogues	18491.9	17740.9	19840.5	46182.9	29469.9	19691.7	25180.5	20228	18864.2	22787.3	22851.5	20771.8	25297.3	22615.7	20492.6	18913.8	21453.2	29443.6	25572	36168.1	18903.4	51459.8	26951.5	25408.5	25373.5	26207.5	26207.8	25846.1
M842T488_2	842.419	487.945	L-glutamic acid, l-methionyl-l-alanylglycyl-l-prolyl-l-histidyl-l-prolyl-l-valyl-l-isoleucyl-l-valyl-l-isoleucyl-l-threonylglycyl-l-prolyl-l-histidyl-l-.alpha.-glutamyl-	[M+2H]2+						2658.29	4069.61	4906.15	4477.57	5920.83	9157.23	10673.3	15549.4	2988.01	13905.7	3260.43	12458.2	4880.1	3474.39	14711.3	5447.61	7013.72	4587.6	2982.32	5475.87	22461.2	7506.52	8991.29	18661.1	10462.3	10405.7	13143	10459.7
M129T75	129.065	74.787	L-Glutamine	(M+H-H2O)+	HMDB0000641	C00064	Organic acids and derivatives	Carboxylic acids and derivatives	"Amino acids, peptides, and analogues"	82213.2	75655.9	66297.2	83473.3	66983.5	105918	105687	125554	85356.7	137564	76474.8	53380.7	93990.8	111527	60513.7	62880.3	69861.7	127991	127425	93581.7	96483.2	175346	110640	134252	97652.9	115041	115128	115064
M276T391	276.143	390.587	L-glutarylcarnitine	[M+H]+	HMDB0013130		Lipids and lipid-like molecules	Fatty Acyls	Fatty acid esters	273209	150867	190806	215770	159345	92129.2	194285	65286.5	204342	109454	103368	167329	115056	98674.9	178197	113711	104833	119379	133922	143666	155299	109600	91802.9	105372	157503	158320	155368	158318
M144T295	144.101	295.344	L-homoarginine	[M+H-CH3ON]+	HMDB0000670	C01924	Organic acids and derivatives	Carboxylic acids and derivatives	Amino acids, peptides, and analogues	252957	263426	213915	185823	159964	241042	254982	184666	140545	254604	194814	264568	229319	147650	163966	197555	192900	261110	173262	222020	281719	187093	193766	121005	277751	281071	278888	276827
M269T333	269.087	332.958	L-homocystine	[M+H]+	HMDB0000575	C01817	Organic acids and derivatives	Carboxylic acids and derivatives	Amino acids, peptides, and analogues	18035	22371	30074.1	25627.1	22743.9	17294.5	15015.9	15859.8	21041.2	15797.3	21747.5	22170.1	15538.8	21271.2	15430.6	15857	55654.1	27555.8	21086.9	13574.4	20959.2	21598.8	24051.5	22960.2	21215.6	20350.4	19301.8	18255.5
M191T240	191.117	239.982	L-hydroxyarginine	[M+H]+	HMDB0004224	C05933	Organic acids and derivatives	Carboxylic acids and derivatives	Amino acids, peptides, and analogues	87677.1	59218.7	74186.8	100210	52349.6	67887.2	151625	92545.1	86942.8	45495	113900	56939.5	70072.8	106391	44788.3	40113	61843.6	114072	107539	41207.4	63553.4	79995.1	84538.1	53814.9	86881	89505.3	86885.5	86877.6
M132T332	132.101	332.042	L-Leucine	(M+H)+	HMDB0000687	C00123	Organic acids and derivatives	Carboxylic acids and derivatives	"Amino acids, peptides, and analogues"	76807.6	273376	48774.3	52413.7	13420	28760.5	114625	32067.5	84281.4	59463.5	38977.7	44361.9	43849.4	57240.6	24376	25942.2	49408.1	589376	67268.3	285911	55114.4	54635.9	45570.7	277724	45720.2	42511.1	42519.3	43055.7
M229T187	229.133	186.916	L-leucyl-l-proline	[M+H]+	HMDB0011175		Organic acids and derivatives	Carboxylic acids and derivatives	Amino acids, peptides, and analogues	64322.9	90717.1	55703.2	94754.5	36724.3	70592.1	75097	59617.3	52492.7	74690.9	68922.8	67008.3	58308.1	93850.6	99464.8	52587	61626.8	118092	100355	43671.7	72428.4	110832	86625.8	58825.7	101490	105239	99924.9	99917.4
M129T431	129.101	430.866	L-Lysine	(M+H-H2O)+	HMDB0000182	C00047	Organic acids and derivatives	Carboxylic acids and derivatives	"Amino acids, peptides, and analogues"	12080.8	13066.4	10537.3	12045.2	12236	13313.7	12573.3	16008	12097.9	14054.1	10113.7	17544.5	9500.16	11927.2	13624.4	10613.8	14001.9	25454.3	17656.8	18466	13746.1	19298.2	15352.9	29114.4	16505.1	19819.7	15633.8	15417.2
M150T277_2	150.058	276.649	L-methionine	[M+H]+	HMDB0000696	C00073	Organic acids and derivatives	Carboxylic acids and derivatives	Amino acids, peptides, and analogues	201053	340662	207495	140988	196490	314034	356886	297844	251282	314822	264246	304136	187336	310340	283515	182258	245454	408765	239805	441003	255100	265909	286718	258309	386899	377593	377276	377313
M214T127	214.154	127.024	L-n5-(1-imino-3-pentenyl)ornithine	[M+H]+			Organic acids and derivatives	Carboxylic acids and derivatives	Amino acids, peptides, and analogues	18442.2	13092.3	22281.5	18956.1	34016.7	27910.5	39075.9	31203.9	20489.5	27825.7	17637.4	12771.3	19603.1	17203.6	18208.8	14043.6	23171	22833.6	31020.5	21601.2	27431	30497.9	16128.3	40790.9	24417.1	22082	23763.9	24419
M189T514	189.134	514.128	L-ng-monomethylarginine	[M+H]+	HMDB0029416		Organic acids and derivatives	Carboxylic acids and derivatives	Amino acids, peptides, and analogues	122044	77922.8	86123.8	59055.4	99216.4	89247.8	68843.7	79117.6	45737.1	65398.4	81598.5	62141.3	50610.5	92813.9	50482.2	68348.7	68443.4	116777	55105.5	126096	69786.5	73146.8	74146.9	47751.5	129071	125540	125577	138644
M118T263	118.085	263.277	L-norvaline	[M+H]+	HMDB0013716	C01826	Organic acids and derivatives	Carboxylic acids and derivatives	Amino acids, peptides, and analogues	76557	179331	118725	27321.2	60268.1	144710	98250.9	71556.6	106486	132037	259971	145764	49351.2	85632	303840	197966	196390	234458	108351	218014	77928.9	55680.4	122718	148539	181234	181202	167667	181267
M400T200	400.341	200.407	L-palmitoylcarnitine	[M+H]+	HMDB0000222	C02990	Lipids and lipid-like molecules	Fatty Acyls	Fatty acid esters	7459.74	37185.7	99370.3	7838.34	45370.2	51044.5	5857.53	47646	5727.53	58653.2	106611	8114.68	59748	5644.64	52909.6	40052.2	93857.7	5907.18	72131.7	4748.58	3578.99	4827.22	6791.05	84279.6	27847.4	75267	33168.7	62093
M166T273	166.085	273.391	L-Phenylalanine	(M+H)+	HMDB0000159	C00079	Organic acids and derivatives	Carboxylic acids and derivatives	"Amino acids, peptides, and analogues"	342442	554110	348193	239300	324433	579581	646045	462103	432507	597622	559249	473398	328690	575204	434919	346803	365453	712443	396881	586693	452589	391168	439730	423353	514278	514019	514605	284527
M130T520_2	130.086	519.789	L-pipecolic acid	[M+H]+	HMDB0000716	C00408	Organic acids and derivatives	Carboxylic acids and derivatives	Amino acids, peptides, and analogues	839257	888896	840495	798597	539641	935580	893046	788130	885227	1.01497e+06	1.03877e+06	997402	692558	896976	828406	781380	678878	1.34685e+06	554164	1.19302e+06	773641	557803	835660	656688	1.67462e+06	1.75843e+06	1.69915e+06	1.90192e+06
M218T273	218.138	272.51	L-propionylcarnitine	[M+H]+	HMDB0062514		Lipids and lipid-like molecules	Fatty Acyls	Fatty acid esters	29006.9	39409.9	44456	41531.7	39944.2	29537.5	55145.6	46150	34928.5	40482.8	47383.3	48146.9	26925.7	32811.5	25171.6	32068.6	30375.5	35306.7	50568.1	55440.6	39308	40652.1	40227.6	29772.5	45075.2	42941.1	44921.2	42918.3
M259T397	259.128	396.862	L-saccharopine	[M+H-H2O]+	HMDB0062698	C00449	Organic acids and derivatives	Carboxylic acids and derivatives	Amino acids, peptides, and analogues	76294.9	135871	87158.1	201374	91727.9	128181	181410	123975	96474.1	177343	117524	172026	106508	315508	133069	114664	97882.3	359667	339192	152836	121466	493034	158975	287109	214889	214888	213956	213966
M175T390_2	175.071	390.283	L-thiocitrulline	[M+H-NH3]+			Organic acids and derivatives	Carboxylic acids and derivatives	Amino acids, peptides, and analogues	199765	394883	339675	42644.1	179034	414963	268079	82383.6	480804	247272	335925	308827	169436	76925.1	184830	234364	192043	87878	40191.3	199675	105997	66173.8	123965	75462.5	261534	263937	262493	255978
M204T75	204.112	75.01	L-tryptophanamide	[M+H]+		C00977	Organoheterocyclic compounds	Indoles and derivatives	Tryptamines and derivatives	154932	55769.2	103150	165987	171024	95463	164801	99914.2	46208.2	145230	98744	75819	128646	176376	88743.3	140023	175689	165441	138512	34980.9	199730	151222	179987	46444.3	110599	135778	110770	111028
M181T307	181.096	306.808	L-tyrosinamide	[M+H]+			Organic acids and derivatives	Carboxylic acids and derivatives	Amino acids, peptides, and analogues	74901.3	88277.2	91245.5	52483.1	63056.7	68448.1	61868.7	48912.2	50185.5	38683.4	54259.4	64489.7	51198.7	48236.5	51271.8	41518.1	42934.6	48564.8	36569.1	27290.2	60702	36177.8	60890.9	38178	64036.8	69724.4	65178.9	64057.2
M496T404	496.213	403.792	L-tyrosine, n-(2-benzoylphenyl)-o-[2-(methyl-2-pyridinylamino)ethyl]-	[M+H]+		C15626	Organic acids and derivatives	Carboxylic acids and derivatives	Amino acids, peptides, and analogues	37489.9	35969.7	72412.1	62512.4	37352.5	31552	26296.2	18688	36384.9	25053.3	53496.7	37185.6	64663.3	46843.4	28908.7	46779.9	24413.8	51679.8	38877.4	31464.2	70675.5	32240.5	31500	40208.7	31532.9	36315.1	40104.2	37685.8
M443T307	443.233	306.509	L-valinamide, n-(4-methoxy-1,4-dioxobutyl)-l-alanyl-l-alanyl-l-prolyl-n-(4-methyl-2-oxo-2h-1-benzopyran-7-yl)-	[M+H-C8H11NO4]+			Organic acids and derivatives	Carboxylic acids and derivatives	Amino acids, peptides, and analogues	37663.9	23724.4	28826.6	47079.7	19129.1	29441	22996.3	32234.6	24962.1	26228.6	29875.4	20868	24614	23704.7	17370.1	30922.4	25801.9	24297.2	23467.1	12525.3	18551	28982.3	29741.3	17647.6	25097.1	25121.2	27318.3	26037.4
M329T367	329.179	367.064	Labetalol	[M+H]+	HMDB0014736	C07063	Benzenoids	Benzene and substituted derivatives	Benzoic acids and derivatives	29164.4	38757.6	25940.8	32709.3	169684	8577.18	35167.6	31071.2	32026.5	23951.9	77825.2	13996.6	30719.5	51857.1	42822	29594.4	29079.1	30773.4	30557.5	29122.3	36167.2	22885.4	18527.3	26519	37074.3	27743.3	38885.3	38581
M360T257	360.147	256.882	Lactulose	[M+NH4]+	HMDB0000740	C07064	Lipids and lipid-like molecules	Fatty Acyls	Fatty acyl glycosides	19495.7	21198.3	26307.8	28007.8	21438.5	28391.3	14808.7	25694	22596.4	23522.5	17003	26459.1	23095.5	30753.7	24034.5	24027.4	21724.4	38591.2	28011.1	15897.5	16713.5	21833.6	21778.8	21177.2	31603.8	31246	32171.6	31244.7
M535T59	535.268	58.885	Lappaconitine	[M+H-CH6O2]+		C08694	Lipids and lipid-like molecules	Prenol lipids	Diterpenoids	282396	93839.7	102302	368556	94624.6	131851	116590	132152	87382.2	144598	223534	117098	105851	155159	31830.5	110277	147219	273834	326769	126269	142845	265090	196816	477535	193441	234083	192809	193453
M613T305	613.355	304.913	Lasalocid	[M+Na]+			Lipids and lipid-like molecules	Prenol lipids	Terpene glycosides	16583	18399.8	16208.2	21176.5	16136.4	14828.6	17724.5	20471.5	14591	18776.3	17293.6	15993.9	7366.18	20588.5	18812.8	16487.2	20543.1	25083.6	24319.7	21637.9	18853.1	13908.7	25812.3	17500	21253	22528.4	22570.8	21498.3
M428T498	428.211	497.882	Lasiocarpine n-oxide	[M+H]+						187580	84234.2	159120	219567	108598	325799	143698	117526	137302	423615	86469.3	464441	61896.1	143029	132421	71770.2	153291	147784	1.29196e+06	239668	98079.4	220942	121023	828779	309085	316392	312101	310302
M404T170	404.208	169.948	Latrunculin a	[M+H-H2O]+		C16901				68966.7	62592.6	68844.4	80950	110721	132583	94205.7	76548.6	104333	88046.9	79334	63145.7	69250.8	71807	49527.5	78692.5	34822.3	119969	90505.5	67835.9	91443.1	75844.5	73575.3	69429.2	101625	75706.9	85742.8	75803.9
M378T209	378.173	209.268	Latrunculin b	[M+H-H2O]+		C19904				62848.8	207331	83942.9	57209.3	40220.1	90314.8	88969.5	103503	36957.6	108158	42181.1	78453.5	136329	58253.7	152467	104059	54305	30521.4	57326	82068.1	71596.4	47517.6	126793	113689	55117.2	38870	57407.5	51487.2
M541T208_2	541.338	207.547	Leptomycin b	[M+H]+			Lipids and lipid-like molecules	Fatty Acyls	Fatty acids and conjugates	2.99239e+06	3.22373e+06	3.04157e+06	3.10808e+06	2.66606e+06	2.43493e+06	2.29487e+06	1.97194e+06	3.76583e+06	2.63228e+06	3.41438e+06	3.15558e+06	152981	2.97386e+06	3.56673e+06	354000	2.61849e+06	1.2347e+06	2.05623e+06	3.3149e+06	423465	2.08036e+06	2.72558e+06	2.20861e+06	1.42964e+06	1.43914e+06	1.43874e+06	1.42959e+06
M167T558	167.117	557.598	Leu-Ala	(M+H-2H2O)+						520310	447206	397985	764227	505332	451602	491384	529793	365809	436368	578432	425181	451667	630851	432793	489108	454086	1.5615e+06	634324	581936	450550	447231	556386	392575	1.59725e+06	1.63096e+06	1.59644e+06	1.65738e+06
M331T407	331.221	406.861	Leu-Ala-Lys	[M+H]+			Organic acids and derivatives	Carboxylic acids and derivatives	Amino acids, peptides, and analogues	30726.3	35727.9	28682.8	89171.9	58351.8	16567.8	15735.9	37452.2	42789.6	39378.2	45905.6	16229.9	20142.2	101431	43182.3	48182.6	105658	108288	117573	71227	21367.6	117943	75671.2	71523.3	57326.6	57314.2	57931	60748.5
M288T223	288.154	223.363	Leu-Asp	(M+CH3CN+H)+						14759.4	12848.7	12024.5	14015.3	11496.9	16755.6	16644.8	18180.1	31853.9	9919.4	36467.2	14567.6	11511.3	16637.9	16061.5	16330.8	28841.4	31864.9	19373.3	16548.5	15724.9	15645.4	6268.46	20466.6	23306.6	23311.1	19744.7	22608.9
M302T195	302.206	194.619	Leu-Gly-Leu	[M+H]+			Organic acids and derivatives	Carboxylic acids and derivatives	Amino acids, peptides, and analogues	72114.8	41044.3	53512.8	99601.4	67287.8	65879	79168.6	151232	29582.6	47381.1	39736.9	70792.9	43791.6	74669.3	63210.9	42224.5	116252	347513	134482	181432	77488.1	114581	153960	199796	154282	154296	152200	144046
M317T347	317.206	346.537	Leu-Gly-Lys	[M+H]+			Organic acids and derivatives	Carboxylic acids and derivatives	Amino acids, peptides, and analogues	58455.3	33846	20251	67254	19526.2	24550.9	22751.7	47473.8	15889.7	37106.3	26031.9	45570.1	58362.7	63878.1	47892.5	20180.1	39573.7	44780.2	55046.5	44786	41450.7	32480.7	58498.2	49302.9	28208.7	32683.9	30300.2	32906.6
M359T146	359.057	145.537	Leu-Ile	(M-2H+3K)+						9644.87	10673.6	8166.36	5043	15619.1	8613.05	34112.3	5526.33	28311.8	6071.12	4505.15	6677.24	8045.46	4457.89	5814.43	4169.81	43099.5	52357.1	55935.7	10882.6	5447.41	3261.94	9430.3	8223.87	51578.8	51582	51230.9	50467.2
M388T519	388.289	519.104	Leu-Lys-Lys	[M+H]+			Organic acids and derivatives	Carboxylic acids and derivatives	Amino acids, peptides, and analogues	10422.4	4586.24	4612.14	10396.7	11090.7	10986.8	7967.41	21262.4	2621.89	13125	5918.61	10020.5	3666.91	15245.6	9300.68	1682.91	7172.84	55671.6	13512.5	16514.4	11232.7	14705.1	21515.9	35186.3	16923.8	22233.4	23590.4	23582.2
M263T176	263.14	175.768	Leu-Met	[M+H]+			Organic acids and derivatives	Carboxylic acids and derivatives	Amino acids, peptides, and analogues	47013.2	63065.8	49090	62863.7	38805	56493.8	87403.2	84745.4	43086.1	74430.5	42216.5	190374	35870.6	53942	46518.8	40985.2	43443.4	140896	90941.4	82063.9	50175.6	72928.9	63078	93437.8	105229	103245	104335	146566
M279T57	279.169	56.7285	Leu-Phe	[M+H]+			Organic acids and derivatives	Carboxylic acids and derivatives	Amino acids, peptides, and analogues	184330	233643	142379	251782	253983	303112	180700	243967	149041	160088	141214	448584	128478	196211	611546	156820	167429	284761	231011	554240	177802	307393	186176	224568	231791	190381	231291	231263
M389T340	389.247	339.605	Leu-Thr-Arg	[M+H]+			Organic acids and derivatives	Carboxylic acids and derivatives	Amino acids, peptides, and analogues	12011.9	27334.9	10113.6	11443	30119.1	27854.9	32444.6	35655.7	17168.4	23784.3	13146.7	45356.1	25143.2	23825.5	22228	25688.7	20596.9	63081.1	15528.5	31515	8899.58	50372.6	25895.1	93777.2	27744	23422.6	24903.6	26000.7
M361T417	361.246	417.177	Leu-Thr-Lys	[M+H]+			Organic acids and derivatives	Carboxylic acids and derivatives	Amino acids, peptides, and analogues	9874.63	11092.4	13679.5	64056.3	12967.6	6597.12	10676.4	58576	7484.7	5676.11	8001.97	10741.5	6398.85	63691.8	13156.5	10054.5	15489.5	74177.6	12372.4	16779.5	12215.5	54228.4	12197.9	53449	33561.8	21859.7	18114.8	22208.1
M318T172	318.181	171.823	Leu-Trp	[M+H]+			Organic acids and derivatives	Carboxylic acids and derivatives	Amino acids, peptides, and analogues	62124.9	75361.8	55312.8	69727.2	56407.1	64757.7	67113.5	61946.4	113390	67190	51459.6	59693	43781.2	53012.8	58079	55005	63534.8	155061	90849.1	46107.9	53258.9	68906.2	81526.4	78740.5	65940.4	65442.7	70734.7	69406.6
M231T186	231.17	185.925	Leu-Val	[M+H]+			Organic acids and derivatives	Carboxylic acids and derivatives	Amino acids, peptides, and analogues	297243	434413	276252	694475	305539	485414	765257	1.24363e+06	210422	524649	240216	691039	204727	742792	380054	254358	540509	3.26523e+06	1.35985e+06	1.1086e+06	359553	1.31479e+06	939816	1.74371e+06	1.10135e+06	1.12216e+06	1.10178e+06	1.10128e+06
M359T323_2	359.263	323.224	Leu-Val-Lys	[M+H]+			Organic acids and derivatives	Carboxylic acids and derivatives	Amino acids, peptides, and analogues	45722	28810.8	24950.4	50772	37857.6	39646.1	53647.3	118534	9060.17	40573.2	17776.3	73783.4	20368.1	39503.6	22999.3	18127.4	44627.1	161587	49516.8	80554.1	59610.3	63619	66322.8	117421	60403.9	58142	53968.7	60332.8
M132T255	132.102	255.276	Leucine	[M+H]+	HMDB0000687	C00123	Organic acids and derivatives	Carboxylic acids and derivatives	Amino acids, peptides, and analogues	592698	1.23586e+06	725590	452107	647813	1.05619e+06	1.15125e+06	798524	918555	1.10159e+06	914405	1.0248e+06	627883	1.13349e+06	1.03383e+06	1.07002e+06	744311	1.38703e+06	756197	1.42322e+06	847283	884774	961454	759981	1.2668e+06	1.28673e+06	1.28666e+06	1.2813e+06
M245T172	245.185	171.92	Leucylleucine	[M+H]+	HMDB0028933	C11332	Organic acids and derivatives	Carboxylic acids and derivatives	Amino acids, peptides, and analogues	210397	326688	241374	484583	260476	315290	552100	1.09718e+06	182059	427585	174083	485430	156328	533406	249813	207327	342338	2.10632e+06	948252	648529	284072	975292	639992	1.35958e+06	768081	779748	768012	779634
M626T487	626.297	486.583	Leukotriene c4	[M+H]+	HMDB0001198	C02166	Organic acids and derivatives	Carboxylic acids and derivatives	Amino acids, peptides, and analogues	11316.9	14306.5	13990.2	16484.5	12120.2	15426	15818.3	15677.6	12856.5	13462.9	14883	10160.2	13917.9	14696.7	14537.7	14501.8	4258.03	20604.4	14495.7	17956.3	13769.5	16251	17226.8	14346.7	20083.6	20085.2	19435.5	19862.5
M493T244	493.278	244.407	Leukotriene d4 methyl ester	[M+H-H2O]+			Organic acids and derivatives	Carboxylic acids and derivatives	Amino acids, peptides, and analogues	40148.3	48294.5	57274.1	185476	58961.9	47424.8	33230.1	54553.5	40035.1	84714.2	37230.9	89315.5	31763.7	41713	47241.7	45626.2	47868.4	42438.2	659725	205788	38597	118265	77899.5	157168	84161.4	83296.5	84167.6	81749.2
M409T219	409.302	218.773	Leupeptin	[M+H-H2O]+	HMDB0001190	C01591	Organic acids and derivatives	Carboxylic acids and derivatives	Amino acids, peptides, and analogues	78748.2	81384.4	72713.5	96064.9	50633.1	78498.7	76883.7	5157.75	54953.6	62436.8	64878.7	40323.9	67020.8	83575.3	86880.9	70660.8	80708.8	95087.8	97176.4	80250.3	71974.7	80544	34517.9	68118.6	99666.4	99668.9	100163	100938
M427T199	427.311	199.465	Leupeptin hemisulfate salt	[M+H]+	HMDB0001190	C01591	Organic acids and derivatives	Carboxylic acids and derivatives	Amino acids, peptides, and analogues	8604.1	12619.2	47179.6	55640.4	68654.9	39248	70021.6	35242.5	85149.1	33829	19760	14131.3	15470.8	68177.6	46874.6	21377.6	15517.6	67626.1	58240.6	55386.3	28299.7	10023.3	63475.9	13072.6	45852.3	32944	34276.8	41171.5
M362T365	362.158	364.818	Levofloxacin	[M+H]+	HMDB0001929	C07660	Organoheterocyclic compounds	Quinolines and derivatives	Quinoline carboxylic acids	114130	141821	150193	141951	178933	158353	135987	133220	152253	114768	166456	149134	155743	66433.3	148961	156621	144921	53885	129982	118348	137774	84776.2	117017	115393	127919	120172	127957	127934
M714T450	714.24	450.284	Lewis b tetrasaccharide	[M+K]+			Organic oxygen compounds	Organooxygen compounds	Carbohydrates and carbohydrate conjugates	33268.6	12671.8	35362.3	56091.5	29224.2	16687.2	8864.13	11096.7	74952.5	6611.61	33449.2	18213.1	19430.6	39515.2	35027.8	13813	36971.9	9185.34	43166.7	23150.9	13556.4	36155.5	27352.2	18852.6	23229.8	20708	20718.7	21306.1
M429T424	429.196	423.867	Lincomycin	[M+Na]+		C06812	Organic acids and derivatives	Carboxylic acids and derivatives	Amino acids, peptides, and analogues	50650.6	45225.9	54418.2	58693.7	50136	50939.4	49587.3	46288.1	33120.7	56366.2	50647.5	60250.2	53910	57906.5	58092.5	50820.9	54578.1	56363.3	58437	48349.9	43740.1	56948.5	49592.7	45342.6	58691.3	59171	58250.1	59172.3
M173T193	173.107	193.463	Linderane	[M+H-C3H4O3]+		C09495	Organoheterocyclic compounds	Dioxanes	1,4-dioxanes	13597.9	29770.4	15311.4	18368.3	10800.5	8489.77	21838.8	18907.5	9106.47	16794.8	11884.8	20439.6	8487.12	24046.6	26742.5	13515.6	16479.9	21782.4	18320	5654.22	26335.7	19049.2	18789	13112.9	20084	21471.9	22017.2	22002.2
M279T130	279.231	130.113	Linolenic acid	[M+H]+	HMDB0001388	C06427	Lipids and lipid-like molecules	Fatty Acyls	Lineolic acids and derivatives	1.44221e+06	1.5853e+06	1.15369e+06	1.35659e+06	1.46033e+06	1.33036e+06	1.21397e+06	1.4015e+06	1.63913e+06	927186	1.63922e+06	795830	1.16399e+06	1.14481e+06	1.34593e+06	1.35642e+06	1.23259e+06	992800	1.69029e+06	985135	1.27575e+06	753977	1.16903e+06	1.23245e+06	1.49244e+06	1.39756e+06	1.47125e+06	1.49175e+06
M320T209	320.257	208.923	Linoleoylglycine	[M+H-H2O]+			Organic acids and derivatives	Carboxylic acids and derivatives	Amino acids, peptides, and analogues	77753.4	137644	121447	100464	61629.8	87830.9	85182.8	63026.7	119589	64244.8	117193	117068	60149.5	90954.8	121938	61952.9	108952	136273	105872	87339.5	64831.6	74543.7	135696	43716.9	114760	114926	114944	133351
M406T300	406.233	300.329	Lisinopril	[M+H]+			Organic acids and derivatives	Carboxylic acids and derivatives	Amino acids, peptides, and analogues	116333	91235.6	90213.2	124549	95346.3	108821	110293	99439.7	93980.8	123501	78745.7	88386.9	99504.6	175042	140887	145530	141777	132746	170284	111724	108968	98578.8	110855	80083.9	134452	134419	134402	144187
M434T289	434.323	289.293	Lithocholylglycine	[M+H]+	HMDB0000698	C15557	Lipids and lipid-like molecules	Steroids and steroid derivatives	Bile acids, alcohols and derivatives	32047.2	27649.7	30523.5	36110.3	30165.5	27925.5	29045.6	26089.9	33433.9	23199	32828.2	24601.9	28406.4	33551.6	33871.8	25782.2	35463.7	32557.1	34071.3	27419.8	24637.3	26569.7	38448.5	21899.4	36942	37465.2	36968.8	37462.7
M746T475	746.211	474.983	Lnnt	[M+K]+			Organic oxygen compounds	Organooxygen compounds	Carbohydrates and carbohydrate conjugates	4895.72	4853.7	7194.22	5766.93	7025.72	12704.9	6037.65	6176.17	12140.7	6460.91	7578.09	14893.5	7649.93	6539.31	5053.1	9339.72	5689.45	5414.38	7673.14	10273.1	9039.28	11478.5	12200.1	11749.3	4784.83	5076.81	4184.8	5077.85
M730T476	730.234	475.667	Lnt	[M+Na]+	HMDB0006566		Organic oxygen compounds	Organooxygen compounds	Carbohydrates and carbohydrate conjugates	24071.3	37711.4	39984.2	42851.9	44756.3	47844.8	37079.8	29024.2	44278	51895.8	30063.5	80851.3	28771	26224.9	35423.1	36927	34718.7	21182.1	32612.8	48460	52935.5	57860	61557	61588.5	23155.2	23525.5	23524.9	22356.9
M322T380	322.2	379.937	Lobelanidine	[M+H-H2O]+		C10156	Organic nitrogen compounds	Organonitrogen compounds	Amines	92397.3	259881	247108	267510	675934	618851	243763	224118	620976	192566	637081	572087	207916	86597.2	262981	274187	228086	71570.7	214674	205145	253912	111455	204743	189828	217881	231913	229457	239617
M419T373	419.176	373.253	Lofepramine	[M+H]+			Organoheterocyclic compounds	Benzazepines	Dibenzazepines	35127.8	51531	31955.5	41573.3	33926.7	50710.8	44643	22614.3	22357	78270.3	46899	60347.8	20806.6	44627.4	34709.7	27912.3	32541.9	50119.5	56557.4	42730.8	42566.4	48117.5	62661.2	106421	42902.9	51736.7	51490.9	51838.4
M477T140	477.24	140.184	Loperamide	[M+H]+	HMDB0004999	C07080	Benzenoids	Benzene and substituted derivatives	Diphenylmethanes	149384	137355	149388	132395	113634	137149	64610.7	107037	94893.6	99698	129444	176788	136682	134593	138214	129496	120027	65436.5	153260	192078	100042	99904.1	76299.3	88199.2	65194.5	56656.7	45909.9	59771.9
M447T426	447.255	425.551	Lopinavir	[M+H-C9H14N2O2]+	HMDB0015539	C12871	Organic acids and derivatives	Carboxylic acids and derivatives	Amino acids, peptides, and analogues	12912.5	7654.92	7839.24	26294	4671.9	8343.53	4803.9	10416.8	4999.21	12877	7625.68	6705.18	4508.8	20187.3	11020.5	10712	8796.66	29515.4	17689	14647.8	6682.88	23163.4	29059	30263.7	18146.1	21408.8	20429.4	21042.1
M427T239	427.263	239.31	Lovatatin	[M+Na]+	HMDB0014372	C07074	Organoheterocyclic compounds	Lactones	Delta valerolactones	32147.2	36565.3	38136.5	39912.5	35561.3	31374.4	45950.9	32870.1	37178.3	32151.4	32568	30172.2	38933.4	31076.2	33640.1	41937.8	49792.5	63897.8	42539.4	44514.6	33706	34976.1	40663.8	27202.9	41049.9	41592.7	41147.4	41050.9
M520T184_2	520.335	184.233	Lpc 18:2	[M+H]+			Lipids and lipid-like molecules	Glycerophospholipids	Glycerophosphocholines	23044.5	21490.1	26863	29868.4	24450.9	30441.4	31266.6	31838.7	26994.5	18709.4	19927.6	18374.2	27488.9	25702	12005.5	60006.6	41148.9	118652	24105.6	30627.8	27966.1	10533	80475	24121.6	44591	38676	38688.1	41555.9
M324T243_1	324.195	243.037	Lsd	[M+H]+	HMDB0000802	C00715	Alkaloids and derivatives	Ergoline and derivatives	Lysergic acids and derivatives	212716	231786	222985	283249	188104	216090	222549	204368	214260	197662	219910	222102	203691	277954	273393	206484	261440	251750	285006	201583	214319	253217	253831	197661	281430	281430	279778	272331
M243T55_2	243.086	55.123	Lumichrome	[M+H]+		C01727	Organoheterocyclic compounds	Pteridines and derivatives	Alloxazines and isoalloxazines	24208.3	111863	37054.8	65626.1	26734	34918.4	63853.5	49544.8	21646.8	5788.28	30759.7	69761.7	36569.1	95572.5	21444.5	39450.1	102420	41531.7	53626.6	31474.9	30780	73792.4	33902.4	37604.7	48945.4	57573.3	46310.5	46682.6
M465T309	465.173	308.828	Lusitanicoside	[M+Na]+		C10474	Organic oxygen compounds	Organooxygen compounds	Carbohydrates and carbohydrate conjugates	6982.12	6526.82	11726.8	19609.4	11535	11718.4	11240	13241.5	10306.4	11558.2	12798.4	10251.5	10172.4	42135.6	13415.7	13602.9	18758.8	16203.9	28034.1	11255.2	14679.8	42902.3	14005.2	16433.9	19396.6	23488.2	23498.8	23476.6
M471T585	471.102	585.356	Luteolin 7-glucoside	[M+Na]+	HMDB0035588	C03951	Phenylpropanoids and polyketides	Flavonoids	Flavonoid glycosides	6757.87	8947.75	10534	7365.31	5213.57	7855.42	10588.5	5753.96	6501.18	6715.05	6839.28	6541.45	7363.24	7343.71	7061.18	6041.28	6301.62	7283.25	8200.45	9762.08	7241.18	6858.13	7871.59	20289.4	13773.9	9480.76	9449.03	9468.23
M300T169	300.194	169.477	Lycopsamine	[M+H]+		C10347				23876	34828.5	51088.9	41736.5	30855.4	23712.6	35855.5	18553.5	44277.7	34396.8	27726.3	29646.3	44014.3	22418.2	25427	48984.2	30256.4	47818.4	48385.3	35298.8	31865.5	62970.1	23319.3	31246.4	40958.5	41095.1	45789.4	41326.7
M288T85	288.143	85.376	Lycorine	[M+H]+		C08532	Alkaloids and derivatives	Amaryllidaceae alkaloids	Lycorine-type amaryllidaceae alkaloids	578945	425740	594679	738739	549842	546849	641814	501817	419898	552060	702844	412711	686863	905246	524921	735478	592517	537344	533948	223953	608296	461554	629467	387718	635178	682167	609581	607676
M230T275_1	230.15	274.699	Lys-Arg-Arg	[M+2H]2+			Organic acids and derivatives	Carboxylic acids and derivatives	Amino acids, peptides, and analogues	76789.1	60318.5	67598.3	65627.4	67018.6	32784.9	99733.5	46840.5	74448.4	125913	195095	128898	119155	129711	79242.5	108496	77139.1	52597.4	65838.4	132660	66516.9	90988.2	59644.4	126073	81308.1	74563.6	80269.1	74900.8
M291T352	291.154	352.341	Lys-Cys	(M+CH3CN+H)+						59567.8	18063.3	61235.8	81741.7	24639.7	18409.4	21368.4	28834.7	20766.5	38191.6	25516.5	14887.7	61506.7	93773.6	20955.9	31353.6	110524	75893.4	79209.9	66296.2	31716.3	98061	37926.5	38354.6	48311.5	56089	50156.6	48383.4
M275T400	275.159	400.034	Lys-Gln	[M+H]+			Organic acids and derivatives	Carboxylic acids and derivatives	Amino acids, peptides, and analogues	101347	100550	95399.1	110587	150592	111572	112397	124809	84185.7	118564	135230	129121	103630	120615	185834	84530.6	118291	146761	124254	108254	108070	112788	122498	95793.4	175371	151094	170317	176362
M216T60_1	216.122	59.522	Lys-Gln-Arg	[M+2H]2+			Organic acids and derivatives	Carboxylic acids and derivatives	Amino acids, peptides, and analogues	146018	309574	157028	82918.4	102999	123510	181998	77336.1	193595	126381	134247	57647.5	98870.8	294915	81912.5	93836.1	91223	219685	82373.5	153652	83593.1	98466.3	111997	89356.2	91724.7	97638.1	96346.9	99701.8
M404T355	404.259	355.047	Lys-Glu-Lys	[M+H]+			Organic acids and derivatives	Carboxylic acids and derivatives	Amino acids, peptides, and analogues	3502.2	8704.76	7490.87	9690.25	14575.1	27970.4	12866.8	8634.73	10081.8	9305.87	13307.2	11389	8697.91	6191.81	6124.31	6711.16	9879.95	4237.48	3826.35	8652.43	10028.9	6603.76	8673.91	4745.11	8758.42	9929.07	10122.4	10128.7
M260T367	260.196	366.699	Lys-Ile	[M+H]+			Organic acids and derivatives	Carboxylic acids and derivatives	Amino acids, peptides, and analogues	89531.3	98974.8	85449.8	58512	88000.7	86432.6	85044	159196	41354	176498	82708.2	82518.4	45253.5	195051	102546	69574	137037	291455	200989	235901	82254.7	286833	177686	249840	217975	217794	161264	217945
M260T381	260.185	381.449	Lys-Leu	[M+H]+			Organic acids and derivatives	Carboxylic acids and derivatives	Amino acids, peptides, and analogues	11306.1	36332.8	29824.9	32629.4	46825.9	39814.2	38543.5	21155	32030.9	26488	38263.1	41581.4	36983.7	15092.3	36696.2	36029.3	26080.5	6348.41	27390.8	13003.5	35717.5	16502	16977.2	17512.6	23277.2	19374.4	24568.7	24594
M216T326_2	216.158	326.111	Lys-Lys-Arg	[M+2H]2+			Organic acids and derivatives	Carboxylic acids and derivatives	Amino acids, peptides, and analogues	26385.4	30999	10492.5	23273.9	39023.7	24393.7	24210.1	6237.89	24105.2	30171.4	11814	25603.2	21833.8	21378.3	24814.1	12326.7	16299	25115.9	33918.5	20331.1	28036.2	21582.7	18766.8	17719.9	19838.5	20179.1	15423.9	16052.8
M406T349	406.256	349.381	Lys-Met-Lys	[M+H]+			Organic acids and derivatives	Carboxylic acids and derivatives	Amino acids, peptides, and analogues	56347.4	51566.7	46862.5	60932.3	54305.5	62443.9	64900.6	48173.9	62677.9	35825.2	60180.1	63630.8	53630.5	49227.9	53606	41450.5	55220.4	44124.2	57103.1	50327.2	48175.3	34827.4	55479	43693.2	58117.3	53551.8	53511.8	54817.5
M294T351	294.179	350.991	Lys-Phe	[M+H]+			Organic acids and derivatives	Carboxylic acids and derivatives	Amino acids, peptides, and analogues	29713.4	21025.9	24412.2	25970.4	33077	28458.1	13101	26186.5	18322.9	33378.9	26339	16156.8	26514.2	31115.7	16133.1	11741.5	35189.4	43723.2	22785.7	38838.7	13574.5	48342.9	33243	62537.1	26982.6	26147.6	27222.9	23679.3
M203T354	203.138	353.764	Lys-Phe-Lys	[M+2H-NH3]2+			Organic acids and derivatives	Carboxylic acids and derivatives	Amino acids, peptides, and analogues	162583	126346	121909	76738.6	114972	132683	174073	144283	191246	182838	157558	213115	139320	265474	126852	104289	133144	210273	252570	155969	120199	110390	113209	106869	173154	226516	215353	226606
M244T469	244.165	468.971	Lys-Pro	[M+H]+			Organic acids and derivatives	Carboxylic acids and derivatives	Amino acids, peptides, and analogues	298131	383702	287059	208574	227428	342822	255198	295484	71959.6	416120	300813	527463	172422	374278	514845	165748	416767	433017	215703	423882	312328	267242	587397	569393	500224	500285	499990	394804
M372T540	372.284	540.343	Lys-Pro-Lys	[M+H]+			Organic acids and derivatives	Carboxylic acids and derivatives	Amino acids, peptides, and analogues	5704.43	5870.58	2732.28	5764.58	5777.59	2266.29	6117.65	1694.06	3379.3	499.387	5165.25	4264.81	5938.93	5688.27	2370.81	3321.4	5722.28	5415.44	5839.52	1194.08	6571.07	5647.7	2540.86	5895.47	3627.49	4710.49	4707.24	4581.27
M294T323	294.17	323.317	Lys-Ser	(M+CH3COO+2H)+						28657.9	19992.6	23412.9	23493	29825.1	21419.3	34556.3	33941.7	19836.1	22836.4	12745.9	19577.9	29882.4	27017.2	29041	22448.6	22704.8	53451.6	22790.7	24046.6	21620.2	20114.3	23419.4	28965.5	21940.2	23611.4	21512.6	21521.1
M390T350	390.262	350.469	Lys-Ser-Arg	[M+H]+			Organic acids and derivatives	Carboxylic acids and derivatives	Amino acids, peptides, and analogues	83134.8	71373.1	39938.6	52938.1	45002.1	42521.9	41730.9	78955.6	47343.8	31871.2	47086.4	76877.5	76577	96704.5	46113	43031.4	51518.1	111449	102351	38795.7	37408.5	42723	54881.9	73622.6	47125	45247.4	45881.4	45260.3
M332T513	332.182	513.189	Lys-Trp	M+						16673.6	7030.16	4055.44	18562	12277.5	13951.2	14330.6	16326.2	12295.1	5211.71	14685.9	10525.2	11874.1	19045.9	16023.2	13420	5660.64	23565.8	16341.6	16609.2	15802.3	15651	15619.1	13759.1	19628.6	19726.4	14888.2	19747.5
M231T368	231.169	368.303	Lys-Trp-Lys	[M+2H]2+			Organic acids and derivatives	Carboxylic acids and derivatives	Amino acids, peptides, and analogues	687417	386064	455606	530624	457790	558429	334927	203365	544029	302019	401035	464263	477128	284330	626512	355652	306822	328383	306823	330628	374480	204275	406721	321740	445309	446949	437343	446953
M246T372	246.18	371.945	Lys-Val	[M+H]+			Organic acids and derivatives	Carboxylic acids and derivatives	Amino acids, peptides, and analogues	24030.1	28929	24580.1	50723.4	23249.1	22950.7	61734.3	106009	17346.3	62330	24310.1	90121.6	17517.8	46038.2	38411.7	21107	30357.6	178988	89633.2	59282.9	72962	101848	56944.8	110941	65103.5	65955.2	66350.3	67213.8
M130T265	130.085	265.066	Lysine	[M+H-NH3]+	HMDB0000182	C00047	Organic acids and derivatives	Carboxylic acids and derivatives	Amino acids, peptides, and analogues	410880	489235	409169	340289	212377	417130	563888	356283	117688	184569	302695	103685	500277	183420	282014	371571	414433	488707	138389	166168	123566	158016	117156	126818	376644	404694	376541	376606
M110T77	110.023	77.4995	M-guaiacol	[M+H-CH3]+	HMDB0135619		Benzenoids	Phenols	Methoxyphenols	52740.1	77768.3	46644.3	33074	46441	57886.2	79869.5	77983.6	62256.3	19489.9	70922.8	25199.7	61701.6	38528.4	46709.2	54445.7	65552.3	80116.1	16262.4	39087.3	71089.7	61261.2	32008.1	79096.9	67309.8	68905.8	67309.6	69788.6
M846T499	846.305	498.765	Maltopentaose	(M+NH4)+	HMDB0012254		Organic oxygen compounds	Organooxygen compounds	Carbohydrates and carbohydrate conjugates	22128.9	34617.2	37277.9	21350.6	19171	37788.3	29748.5	46424	25453.8	47054.7	20309.8	51264.1	18481.8	21951	29354.5	20754.3	33301.2	38354	29884.2	35946	28611.7	34419.1	35859.7	34039.9	48401	45559.1	45551.8	45755.3
M360T379	360.148	379.322	Maltose	[M+NH4]+	HMDB0000163	C00208	Lipids and lipid-like molecules	Fatty Acyls	Fatty acyl glycosides	462197	435428	721785	186277	450011	1.02889e+06	927147	992679	227585	456253	291793	438179	275694	391302	706631	543796	347793	299917	1.56951e+06	401146	568556	357834	379930	870596	529917	517205	503949	511019
M689T483	689.208	483.178	Maltotetraose	[M+Na]+	HMDB0001296	C02052	Organic oxygen compounds	Organooxygen compounds	Carbohydrates and carbohydrate conjugates	31499.3	147672	102801	48876.8	34351.7	66549.1	52056.4	51544.9	68334.1	51514	65366.1	55378	28927.1	19934.7	30576.5	31315.4	29004.6	13670.3	61951.5	34960.5	63403	66846.9	35405.1	79774	35095.1	34966	32290	27422.5
M933T490	933.314	489.695	Man3 a	[M+Na]+			Organic oxygen compounds	Organooxygen compounds	Carbohydrates and carbohydrate conjugates	9067.39	22490.7	12661.1	14230.7	11252.2	17029.6	11059.9	14553	11872	12056	12419.9	17507.7	7293.37	18775.9	14760.5	12449.3	9549.48	14357.6	9668.86	13502.3	12055	21254.8	27677.1	34779.8	11669.4	12801.1	12188.6	9192.16
M399T382	399.245	381.795	Manoalide	[M+H-H2O]+		C17156	Lipids and lipid-like molecules	Prenol lipids	Terpene lactones	10895.8	19205.5	18981.5	29002.1	18442.3	21388.8	25669.7	3083.55	20024.2	25836.2	22525.2	25264.3	23873	12734.5	24682.8	28508.4	11513	12769.6	28782.6	27971.5	27075.9	32505.2	18157.3	27790.8	26079	26122.2	26219.7	6525.15
M551T61	551.263	61.223	Manumycin a	[M+H]+		C12111	Organic oxygen compounds	Organooxygen compounds	Carbonyl compounds	29997.4	60417.8	39588.2	77929.5	39356.6	42646.6	32899.3	41478	24260.1	35078.9	63390.1	34045.5	34703.7	31677	30749.2	30387.3	28497.9	42340.5	74723.7	24892.7	31583.3	19639.7	42232.7	43369.7	38940.9	41039	39163.5	38940.9
M278T250	278.185	249.761	Maprotiline	[M+H]+	HMDB0015069	C07107				11552.8	22143.3	18408.1	19265.8	27025	39404.2	20816.5	27169.1	23278.4	33890.4	28429.9	32787	14297.8	18030.3	20946.2	24695.8	18257.8	21275.2	24835.3	22744.9	27621.3	28498.4	18924	20345	24379.6	24389.5	27762.1	24276.4
M514T212_2	514.325	212.153	Maraviroc	[M+H]+						28132.4	26782.3	30210.4	32325.8	40556.3	16203.1	32830.5	16397.1	27177.5	20890.7	27268.9	30525.8	26181.6	32545.3	36374.7	27935.4	31506.5	38144.1	36946.1	28003.1	26302.1	35038	33254.7	29243.4	40850.5	41450.3	41291.7	41450.8
M439T348_2	439.314	347.604	Medicagenic acid	[M+H-CH4O3]+			Lipids and lipid-like molecules	Prenol lipids	Triterpenoids	85263.1	24055.8	76190.4	93473.1	64863	99861.1	83178.6	100422	41395.7	71947.6	39572.3	36537.4	83065.2	170981	52837.2	40761.4	77511.7	99971.6	119695	123542	110577	91461.2	96087.7	62312.5	78521.4	100302	74860.3	74408.4
M522T439	522.201	439.143	Melezitose	[M+NH4]+	HMDB0011730	C08243	Organic oxygen compounds	Organooxygen compounds	Carbohydrates and carbohydrate conjugates	106073	81593.1	72126.9	146815	118363	325704	177704	204991	74371	103186	69445	97744.8	57792.3	67271.6	102830	54247.2	79090.9	62559.4	146096	113139	82642.2	75257.3	86973.6	133665	159452	159263	190915	173991
M365T379	365.104	379.325	Melibiose	[M+Na]+	HMDB0000048	C05402	Organic oxygen compounds	Organooxygen compounds	Carbohydrates and carbohydrate conjugates	118457	179444	125236	47968.2	120009	204294	238357	479928	61576.7	298230	107296	171621	148093	141059	52889	86438.7	86996.6	49972.1	146611	98004.3	166918	127160	113805	499682	170041	180528	147520	148659
M248T323	248.163	323.21	Meperidine	[M+H]+	HMDB0014597	C07128	Organoheterocyclic compounds	Piperidines	Phenylpiperidines	61538.8	60001.7	63739.2	71345	64232.1	62378.5	59841.3	66832.6	60154.3	60142	68696.9	68273.2	63713.5	70578.5	75065.8	55989.3	58254.3	65694	65006.8	47054.4	66084.5	50317.1	73056.9	42358.3	58498.5	55425.7	55027	55990.2
M212T336	212.139	335.672	Mescaline	[M+H]+		C06546	Benzenoids	Benzene and substituted derivatives	Phenethylamines	260064	290290	226705	244508	49006.1	250755	28271.1	173698	53402.3	39297	49238.2	43486.6	58827.8	243893	291018	77989.3	202144	191577	148194	88674.2	121430	205700	250927	106143	158307	159507	158318	160745
M567T156	567.293	155.991	Mesoporphyrin ix	[M+H]+			Organoheterocyclic compounds	Tetrapyrroles and derivatives	Porphyrins	94967.4	62573.8	91866.4	552782	71030.3	129064	84370.2	119132	53211.6	118954	61036.4	60148.6	57908.7	320168	87289.5	55731.6	196764	242180	178786	138787	91752.6	463567	574620	182383	235440	234872	222425	235407
M420T331	420.207	331.2	Met-Asn-Arg	[M+H]+			Organic acids and derivatives	Carboxylic acids and derivatives	Amino acids, peptides, and analogues	48279	52743.2	44035.4	58772.7	58004.7	32326.2	24999.8	82045.6	37922.4	50745.7	69002.8	30767.1	20006.8	54306.3	54088.8	29692.6	25121.9	56105.3	59091.7	52036.8	28946.2	11156.3	54972.3	52215.3	54437.9	53182	48050.9	54442.2
M204T131	204.101	131.013	Met-Glu-Lys	[M+2H]2+			Organic acids and derivatives	Carboxylic acids and derivatives	Amino acids, peptides, and analogues	199921	200386	131906	45023.9	167336	280445	170754	92771.9	173745	55380.1	122753	107771	92017.4	54511.8	52489.5	43357.7	36070.1	58165.1	123249	156158	45270.5	152297	200317	43689.2	134327	134316	132384	131375
M319T444	319.176	443.521	Met-Lys	(M+CH3CN+H)+						20829.4	13580.9	17757.3	20779.3	16818.1	18734.4	19585.6	19349.2	21172	6941.44	13625.8	13384.6	14148.9	20318.6	18401.5	14645.5	18459.5	22711.9	19103	18050.7	7565.33	8722.49	17871.9	5644.22	23208.2	23040.4	22783	23208.9
M437T36_1	437.192	36.0675	Met-Met-Arg	[M+H]+			Organic acids and derivatives	Carboxylic acids and derivatives	Amino acids, peptides, and analogues	48134.7	34261.2	33309	22814.3	38679.4	41256.5	31089.9	27354.3	49446.1	19068.8	53258.5	240817	24845	29350.8	148162	49869.3	46583.2	11913.5	54821.2	208493	48356.4	32258.9	49653.5	35601	46268.3	39247.9	42510.9	44383.4
M464T283	464.245	282.881	Met-Trp-Lys	[M+H]+			Organic acids and derivatives	Carboxylic acids and derivatives	Amino acids, peptides, and analogues	19663.3	18510.3	18548.7	8250.17	20587.9	18489.6	19357.3	31326.9	15524	24467.2	16031.5	23469.7	18675.9	39685	23668.5	19850.1	19692.7	9562.55	12590.7	17659	38093.7	17735.6	23772.5	25903.5	29661.6	29650.7	30546.1	30056.7
M469T487	469.237	487.177	Met-Tyr-Arg	[M+H]+			Organic acids and derivatives	Carboxylic acids and derivatives	Amino acids, peptides, and analogues	42525.7	14313.2	36070	35603.3	16375	28550	14296.4	14230.9	39396.3	11940.9	13975.2	14215.2	27247.3	30524.6	26336.6	14849.2	17461.3	22125.1	14386.6	22276.7	15693	4210.94	17013.7	13912	26614.6	26593.4	26571.5	35499.9
M507T393	507.129	393.282	Metaflumizone	[M+H]+		C18523				5904.98	9627.65	12270.9	12860.9	10452	16120.5	10496.7	19723.3	9102.55	35069.7	8134.74	32887.9	11027.3	13907.2	7170.91	11660.2	20739	18452.9	28433.4	24088.7	15822.2	40813.2	26518.9	56485.4	22313.6	21320.7	21141.5	21141.7
M402T300	402.193	300.174	Methanesulfonamide, n-[4-[[1-[2-(6-methyl-2-pyridinyl)ethyl]-4-piperidinyl]carbonyl]phenyl]-	[M+H]+		C13776	Organic oxygen compounds	Organooxygen compounds	Carbonyl compounds	34683.3	109086	69807.8	82971.1	130545	105007	146926	77360.7	102560	58106.3	138928	113795	120693	57215.3	99468.6	87837.6	96159	56578.1	64277	58070.6	138020	26706.1	75044.7	83462	133339	128048	133330	133028
M396T357	396.21	357.404	Methanone, (1-heptyl-5-phenyl-1h-pyrrol-3-yl)-1-naphthalenyl-	[M+H]+			Benzenoids	Naphthalenes	Naphthalenecarboxylic acids and derivatives	44072.8	24656.3	42285	46035.9	13661.9	45950.7	44321.9	42708.7	22890.2	30748.8	26301.2	46593.6	31691.1	37349.4	54093	17618.8	32988.8	41049.7	46508.7	46615.8	46312.4	33675	13500.8	22529.5	39390.9	30708.4	33505.1	30502.5
M382T389	382.22	388.739	Methanone, (1-hexyl-5-phenyl-1h-pyrrol-3-yl)-1-naphthalenyl-	[M+H]+			Benzenoids	Naphthalenes	Naphthalenecarboxylic acids and derivatives	30032	55928.8	23982.3	51221.4	70985.6	71964.7	52702.6	32214.3	54764.9	22982	73370.6	57534.8	42900	30148.7	46504	38208.3	38585.8	29988.2	33899.6	34053.2	56937.7	33189.9	21519.2	26919.7	44808.6	44801.3	42726.7	44291
M384T343	384.214	342.795	Methanone, (1-pentyl-1h-indol-3-yl)(4-propyl-1-naphthalenyl)-	[M+H]+			Organoheterocyclic compounds	Indoles and derivatives	Naphthoylindoles	49130.6	91861	53065.6	84684.7	61118.9	56981.2	41021.9	79112.6	66615.6	49820.5	62127.8	56564.5	151970	45078	61310.7	49509.6	44589.5	50076.9	57595.2	42118.6	64384.3	46540.8	53052.3	49241.2	68260	69276	67086	72768.6
M350T354	350.23	354.244	Methanone, (1-pentyl-1h-indol-3-yl)tricyclo[3.3.1.13,7]dec-1-yl-	[M+H]+			Organoheterocyclic compounds	Indoles and derivatives	N-alkylindoles	18933.7	43620.2	51701.9	60341.6	56053.4	50583.2	42214.7	107648	62318.8	9800.08	59481.6	43523.2	38777.3	17174.2	40334.5	44150.1	31649.3	12034.5	32511.3	35963.6	42134.1	11638.5	28811.5	32440.4	41746.7	43378.8	36485.1	43165.8
M354T386	354.165	386.207	Methanone, [1-(4-hydroxypentyl)-1h-indol-3-yl](4-methyl-1-naphthalenyl)-	[M+H-H2O]+			Organoheterocyclic compounds	Indoles and derivatives	Naphthoylindoles	104692	78814	100161	103232	83111.4	69643.9	84977.1	140866	73607.1	81700.6	48002.5	20103.8	92431.9	97310.3	32017.1	79069	99523.5	102390	99035.9	98054.8	22297.9	92025.8	99840.1	79941.4	44446.1	111662	113206	113298
M368T198	368.256	198.04	Methanone, [1-(5-fluoropentyl)-1h-indol-3-yl]tricyclo[3.3.1.1(3,7)]dec-1-yl-	[M+H]+			Organoheterocyclic compounds	Indoles and derivatives	N-alkylindoles	47222.6	68181.6	58288.9	77334.3	61530.6	57870	84028	47822	63660.3	36412.7	68511.8	72722	44791.6	55687.3	52381.3	51211.4	66900	75906.1	75159.3	45616.1	48787.9	46005.8	59476.4	53674.3	94598.8	99661.5	98484.5	90844.4
M346T215	346.211	215.407	Methanone, [1-(5-fluoropentyl)-6-hydroxy-1h-indol-3-yl](2,2,3,3-tetramethylcyclopropyl)-	[M+H]+			Organoheterocyclic compounds	Indoles and derivatives	N-alkylindoles	79265.9	96699	27896.4	101809	74931	76159.6	41927.4	56295.5	114254	65990.3	25090.3	76052.4	72973.2	31817.4	86602.5	73064	52443.5	57323.8	58024.7	47936.7	77838.9	42083.4	36221.8	43934.1	93221.2	99013.8	90688.5	90676.2
M384T221	384.282	221.127	Methanone, [1-(cyclohexylmethyl)-7-methoxy-1h-indol-3-yl](3,4-dimethyl-1-piperazinyl)-	[M+H]+			Organoheterocyclic compounds	Indoles and derivatives	Indolecarboxylic acids and derivatives	30571.8	31388.5	23508.5	22588.7	11687.6	28363	26963.8	15159.4	35732.1	20761.3	22612.2	35275.2	28283.3	15057	20409.8	20313.1	17874.1	12791.8	26072.6	19031.4	25718.1	19361.9	25274.9	20735.2	27292	27275.7	27160.9	29861.4
M256T295	256.189	295.081	Methanone, [1-[(1-methyl-2-piperidinyl)methyl]-1h-indol-3-yl](2,2,3,3-tetramethylcyclopropyl)-	[M+H-C6H11N]+			Organoheterocyclic compounds	Indoles and derivatives	N-alkylindoles	274672	204501	235870	257029	212945	250351	351335	288667	211039	305574	235084	197512	243576	289806	196850	234428	250559	348331	345635	300869	200093	318987	227511	212917	297081	301192	297076	297081
M262T171	262.124	170.796	Methapyrilene	[M+H]+		C11114	Organic nitrogen compounds	Organonitrogen compounds	Amines	87071.5	87785.7	83536.5	58869.5	83008.1	109868	93500.7	78502.9	109627	78740	83873.4	83187.4	90094	101734	103868	84137.8	92690.8	82685.2	41985.7	42092	80241.9	193029	124780	62937.9	68756	83898.9	83968.7	83885
M251T190	251.128	189.563	Methaqualone	[M+H]+	HMDB0240285	C07560	Organoheterocyclic compounds	Diazanaphthalenes	Benzodiazines	54562.4	51906.3	23997.5	71875.6	41768.6	44766.3	25025.6	27777.5	41716.8	42517.3	39516.7	38822.5	41538	38160.5	45681.8	39301	44893.3	51585.9	36985.7	40558	39480.8	42341.9	39450	42127.1	32814.3	51388.5	51217.6	51289.2
M166T362	166.052	362.49	Methionine sulfoxide	[M+H]+		C02989	Organic acids and derivatives	Carboxylic acids and derivatives	Amino acids, peptides, and analogues	87730.5	145161	82943.1	74461	93350.6	127253	121281	124973	79474.9	138975	89477.2	108552	93645.3	158523	104272	67907.4	109243	152860	125615	176978	106909	132285	122034	123236	141761	141795	135621	140463
M272T186	272.163	185.886	Methoprotryne	[M+H]+		C19104	Organoheterocyclic compounds	Triazines	1,3,5-triazines	56554.6	80696.8	61715.4	89112.8	52169.3	57562.7	57724.6	66344.7	58718.2	58477.9	63034.3	87718.6	73801.8	77840.5	110167	59562	97517.5	77304.3	100571	45949.5	57468.9	88752.7	64704.8	50359.3	87335	80198	81421.2	80177.9
M1095T502	1095.37	502.464	Methyl (4s,5z,6s)-5-ethylidene-4-[2-[[(2r,3s,4r,5r,6r)-3-[2-[(2s,3z,4s)-3-ethylidene-5-methoxycarbonyl-2-[(2s,3r,4s,5s,6r)-3,4,5-trihydroxy-6-(hydroxymethyl)oxan-2-yl]oxy-4h-pyran-4-yl]acetyl]oxy-4,5-dihydroxy-6-[2-(4-hydroxyphenyl)ethoxy]oxan-2-yl]methoxy]-2-oxoethyl]-6-[(2s,3r,4s,5s,6r)-3,4,5-trihydroxy-6-(hydroxymethyl)oxan-2-yl]oxy-4h-pyran-3-carboxylate	[M+Na]+						3152.9	5354.51	4509.62	5030.66	4089.67	5363.64	6737.38	4241.65	3846.25	7870.73	5534.75	5051.32	3335.7	5029.78	5946.55	6199.85	4736.2	5457.69	16529.9	5844.97	4943.7	9366.18	5989.87	5472.92	7669.2	7372.05	8309.8	9362.38
M143T176	143.08	175.649	Methyl 5(s),6(r)-7-trihydroxyheptanoate	[M+H-CH6O2]+			Lipids and lipid-like molecules	Fatty Acyls	Fatty alcohols	25249	6971.28	20493.1	39004	21004.9	40810.8	28044.1	51152	17178.7	33779.1	26760.7	30721.5	19633.8	34915.7	27341	2001.47	18736.3	27298	56256.3	59330.7	31234.8	60945.9	1000.55	44341.1	22645.1	22572.4	17701.7	18765.6
M207T204_1	207.122	204.14	Methyl jasmonate	[M+H-H2O]+	HMDB0036583	C11512	Lipids and lipid-like molecules	Fatty Acyls	Lineolic acids and derivatives	29885.6	44771.9	21571.8	43371.8	25249.4	36747.9	33847.4	15877.2	12989.4	40657.9	42649.2	30620.6	15387.7	26809.3	23616.7	22944.4	25262.2	37878.3	28656.7	22193.9	25499.3	38083.6	44549.9	12903	45865.6	43996.3	44817.2	45423.6
M297T326	297.143	325.865	Methylergonovine	[M+H-C2H5N]+	HMDB0014497		Alkaloids and derivatives	Ergoline and derivatives	Lysergic acids and derivatives	113695	135324	168545	166364	125177	108265	122532	126315	97387	117202	114552	75156.7	129221	136714	114806	126047	117037	119511	127216	140611	122605	120266	101658	129853	115059	86564.8	117679	106591
M683T203_2	683.375	202.736	Methyllycaconitine	[M+H]+		C08699	Lipids and lipid-like molecules	Prenol lipids	Diterpenoids	17263	17525	21763.9	21571.9	21060.9	23276.4	31536.5	18895.6	19701.2	13151.1	22277.1	22530.8	18220.1	21728.4	19502.8	21260.2	22614	28001.7	26519.5	29536.7	25610.3	20244	23288.4	27569.6	32066.8	32429.2	38599.3	32436.8
M234T432	234.143	432.239	Methylphenidate	[M+H]+	HMDB0014566	C07196	Organic nitrogen compounds	Organonitrogen compounds	Amines	19692.9	9269.04	21779.6	20652.9	7454.66	22788.8	21916.5	33338.2	19926	17940.2	21113.7	25464.2	19803.8	11981.7	3362.88	18258.2	9238.33	102719	32057.6	18820.4	20483.2	26719.3	21343	46520.2	27440.4	27105.2	28182.8	28683.9
M268T281	268.189	280.695	Metoprolol	[M+H]+	HMDB0001932	C07202	Benzenoids	Phenols	Tyrosols and derivatives	37328.1	61269	46587.7	58669	69115.7	68000.2	70196.5	45571.1	66280.5	30360	62667.2	64788	59867.7	15688.5	56828.8	47258.9	47467.1	21467	40151.4	40652.2	55722	16132.2	45095.8	32602.1	74474.7	74671.3	74669.8	73627.5
M128T56	128.07	55.865	Metronidazole	[M+H-C2H4O]+	HMDB0015052	C07203	Organoheterocyclic compounds	Azoles	Imidazoles	83492.8	64643.8	53922.9	69973.8	181022	61055.6	135804	72627.7	78455.1	157182	76510.4	42533.5	82503.6	87125.7	27990.2	80237.3	86315.7	97497.6	106173	68473.3	135711	59191.7	84084.2	36348.8	114923	126523	114561	126926
M227T254	227.138	253.957	Metyrapone	[M+H]+	HMDB0015146	C07205	Organic oxygen compounds	Organooxygen compounds	Carbonyl compounds	219302	301652	229481	237871	181810	204310	369183	200124	204547	188084	347794	228197	180268	234227	260589	209449	216280	239210	248633	199877	221271	203427	242076	153174	254592	255699	255707	252015
M202T87_2	202.143	87.4875	Mexiletine	[M+Na]+	HMDB0014523	C07220				70263.4	3628.57	3636.66	4908.76	7162.2	31279.9	8802.64	8291.51	58216	71083.6	15111.2	48450.9	64709.3	55026.9	7538.13	5793.75	73200.8	6421.74	81736.3	33733.4	29410.5	6326.12	17910.4	3240.66	39027.5	25253.1	24443.7	23874.8
M496T295	496.284	295.279	Mibefradil	[M+H]+		C07222				13952.5	29892.5	8467.49	43563.2	11526.5	25767.3	38628.1	45656.4	10645.8	27063.8	25643.4	31029.7	27890.4	44759.7	40378.9	25654	45199.1	35957.3	49678.8	29888.6	16078.8	29551.5	36453.5	41418.3	45842.7	45911.5	45897.1	36537.1
M498T360	498.277	359.554	Microcystin lr	[M+2H]2+		C05371	Organic acids and derivatives	Peptidomimetics	Hybrid peptides	127218	115328	126450	139683	129933	146381	116189	105309	118547	119579	127921	115470	114406	104245	164793	135905	150938	232921	152987	125442	117301	121073	121251	109632	128334	128471	123554	112993
M208T87	208.132	86.883	Miglitol	[M+H]+	HMDB0014634	C07708				8.01018e+06	5.10366e+06	2.67303e+06	3.9524e+06	7.80145e+06	4.15215e+06	7.44819e+06	4.3596e+06	1.53898e+07	3.088e+06	7.33083e+06	2.13697e+06	4.7652e+06	4.22262e+06	1.66332e+06	2.71368e+06	1.20637e+06	7.24762e+06	3.13438e+06	2.60636e+06	4.02136e+06	7.98188e+06	3.56298e+06	3.81664e+06	7.07612e+06	7.08201e+06	7.07269e+06	4.33574e+06
M230T116	230.138	115.798	Milnacipran	[M+H-NH3]+	HMDB0015602		Benzenoids	Benzene and substituted derivatives	Phenylacetamides	604094	463563	640659	1.01676e+06	999359	455793	843642	435502	932186	255376	584803	511253	501729	536158	440078	607126	471071	584825	791640	292487	511481	365476	523712	603797	759919	710476	760633	710295
M212T195_2	212.105	194.881	Milrinone	[M+H]+	HMDB0014380	C07224	Organoheterocyclic compounds	Pyridines and derivatives	Bipyridines and oligopyridines	36251.4	75682.4	62509.3	33535.7	22450.7	30404.6	24438.3	28136.5	40959.3	34760.3	46736.3	23099.5	22553.7	59932.9	34767.6	21413	22166.4	29167.1	35346.3	26258.7	28202.5	38403.5	53245.2	20493	29514.2	34151.9	34160.7	33257.7
M351T213	351.263	212.567	Misoprostol (free acid)	[M+H-H2O]+			Lipids and lipid-like molecules	Fatty Acyls	Eicosanoids	42547.8	34285.7	28465.4	25497.5	20710.2	41792	46010.5	47507.5	56321.3	48979	19888.7	18944.8	27216.4	22478.5	38789.4	27935.7	21478.8	30640.2	43172.8	34205	52318.7	28519.6	48617.2	32064.2	37510	31872.2	31142.5	32709.7
M985T496	985.48	495.987	Molassamide	[M+Na]+			Organic acids and derivatives	Peptidomimetics	Depsipeptides	1852.06	1742.25	1905.82	2418.66	1990.87	3321.31	2867.3	4719.95	1252.31	5192.16	2044.02	2102.46	2205.17	3566.54	3304.38	2076.05	2477.54	4261.77	2495.82	3491.21	3954.86	4989.19	3106.25	5416.73	3711.52	3396.84	3395.96	3485.18
M243T209	243.133	208.684	Molsidomine	[M+H]+			Organoheterocyclic compounds	Oxazinanes	Morpholines	53478.1	80798.1	82754.1	67156.9	42435	47902	58196.8	62471.2	27879	58974.2	39969.9	45117.6	33561.7	70622.3	57559.2	52613.8	39287.7	112158	171945	80609.2	40147.8	62671.4	59746.8	64770.4	70851.6	74126.6	75371	76927.6
M172T340	172.143	339.665	Moroxydine	[M+H]+			Organic nitrogen compounds	Organonitrogen compounds	Guanidines	25776.3	36060.9	18441.5	3379.65	13817.4	8726.93	13913.4	15486.6	39878.1	22475.7	21055.1	23862.1	13713.1	16037	18714.2	14789.2	7910.95	7950.34	2904.85	13236.5	16740.3	5665.39	6290.03	9665.9	12892.8	11914.5	12646.4	12889.9
M622T256	622.36	256.207	Moxidectin	[M+H-H2O]+			Phenylpropanoids and polyketides	Macrolides and analogues	Milbemycins	20296.5	29122.8	22955.5	15410.9	37582.3	16691.7	18456.6	20424	16940.2	18273.1	17948.4	23389.3	17600.5	16228	20573.8	50743.4	53960.5	19197.8	20567.6	17923	16465.2	13586.2	19481.5	22788.4	39836.2	45428.2	39977.1	39899.3
M321T289_1	321.142	289.148	Mycophenolic acid	[M+H]+	HMDB0015159	C20380	Organoheterocyclic compounds	Isocoumarans	Isobenzofuranones	37180.6	28522.9	22358.2	40132.7	29114.7	37238.2	42396.2	34591	28562.2	27822.3	30602.3	25505.4	37793.5	33324.1	24093	27705	38928	46128.2	80643.5	37821	33503.1	24552.6	41455.1	27369.1	54517.3	55090.6	54526.8	56531.2
M402T335	402.26	334.955	Myriocin	[M+H]+		C19914	Lipids and lipid-like molecules	Fatty Acyls	Fatty acids and conjugates	16408.4	17541.5	17019.7	20590.6	18054.4	17194.2	17656	12282.6	19146.4	13110.7	19484.4	12908.6	17107.9	16752.2	14138.1	23172.8	18178.7	27577.2	23658.9	19389.9	14942.1	21802.6	23220.5	20197	15486.4	15489.2	14942.1	15063.7
M394T198	394.271	197.63	Myristoyl-l-carnitine	[M+Na]+	HMDB0005066		Lipids and lipid-like molecules	Fatty Acyls	Fatty acid esters	25135.4	29459.1	25063.1	26518.8	18261.9	23388.8	29773.2	19272.2	24426.1	19472.3	23809.6	24573.2	21015.6	25724.1	33056.2	15791.5	21435.7	32670.8	32869	26133.5	12641.9	30034.6	27717.3	11210	36659.6	35959.4	35518.9	34640.8
M256T289	256.132	289.289	N-.alpha.-(tert-butoxycarbonyl)-l-histidine	[M+H]+			Organic acids and derivatives	Carboxylic acids and derivatives	Amino acids, peptides, and analogues	266342	286675	221417	328299	222427	286997	309841	210758	260964	188708	304751	295685	304006	189084	308831	219906	207740	194048	264888	204404	253050	177249	256624	164088	323301	334559	323305	326316
M254T381	254.138	380.569	N-.alpha.-(tert-butoxycarbonyl)-l-leucine	[M+Na]+			Organic acids and derivatives	Carboxylic acids and derivatives	Amino acids, peptides, and analogues	228213	133897	262906	133515	141931	140202	119252	229465	135963	100622	196632	343296	145977	60813	124962	138845	135669	85436.1	118366	139426	274779	77220	113334	94725.9	127304	136367	137796	138776
M247T304	247.164	303.641	N-.alpha.-(tert-butoxycarbonyl)-l-lysine	[M+H]+			Organic acids and derivatives	Carboxylic acids and derivatives	Amino acids, peptides, and analogues	26954.1	21030.1	23760.8	22723.4	26679.5	28397	20418.8	19153.1	31080	19466.7	22851.9	24201.5	27029.3	14624.2	27066	20573.4	22575.5	14483.1	20690.9	16480.2	21877.5	11714.3	20179.5	15365.9	26716.9	26915.7	26844.6	26915.7
M238T399	238.106	399.06	N-.alpha.-(tert-butoxycarbonyl)-l-proline	[M+Na]+			Organic acids and derivatives	Carboxylic acids and derivatives	Amino acids, peptides, and analogues	41239.1	103914	67443.9	106015	133949	117418	114876	68503.5	124667	49164.5	123238	109046	99192.8	30805.1	86441	78606.1	76323	37964.6	61598.1	58585.8	94578	29409	66778.5	64475.9	86948	90352.4	90343.3	90353.9
M175T378	175.107	377.739	N-.alpha.-acetyl-l-ornithine	[M+H]+	HMDB0003357	C00437	Organic acids and derivatives	Carboxylic acids and derivatives	Amino acids, peptides, and analogues	83044.9	43971.5	51873.4	51376.7	101553	52305.6	42047.4	33744.7	17946.6	51781.4	27328.4	54348.1	40448.5	49031.9	41741.8	51991	36757.8	43320.7	39025.5	67714.7	37075	36323.8	54717.6	22511	54259.6	56561.6	51105.4	52384.9
M464T185	464.284	184.647	N-(.alpha.-linolenoyl)tyrosine	[M+Na]+			Organic acids and derivatives	Carboxylic acids and derivatives	Amino acids, peptides, and analogues	34413.2	40558.8	33865.7	15368.5	34861.8	42131.8	33378.9	38147	28680.5	30440.8	36024.5	19341.2	37393.8	26531.9	29872.4	22034.1	40282.9	63256.7	26377.3	49917.6	27978.4	31582.5	13348	29746.4	39414.7	56555.9	56744.5	56666.6
M102T51	102.054	50.962	N-(.beta.-ketocaproyl)-dl-homoserine lactone	[M+H-C6H8O2]+		C11839	Organic acids and derivatives	Carboxylic acids and derivatives	Amino acids, peptides, and analogues	31820.6	28468.8	28192.5	18225.2	47132.1	9256.61	22239.5	23012.4	28216.9	30787.3	30493.8	14005.9	16105.1	20878.6	10653.9	16986.6	19262.7	16221.2	19808.2	13966.5	19864.4	23068.6	22272.9	26459.7	20785.1	20077.9	19785.9	22274.7
M250T201	250.089	200.639	N-(1,1-dimethyl-2-hydroxyethyl)-3-amino-2-hydroxypropanesulfonic acid	[M+Na]+			Organic acids and derivatives	Organic sulfonic acids and derivatives	Organosulfonic acids and derivatives	47790.4	47517.7	40699	39710.2	26803.5	42413.1	43234.9	4411.09	49698.8	53290.2	44628.3	54046.3	43056.2	55011.4	54904.4	68276.1	79951.7	53983.9	89300.2	16341.1	46100.6	45013.7	46502.9	76082.1	66003.7	68708.6	76026.4	66215.9
M396T190	396.286	189.864	N-(4-hydroxyphenyl)arachidonoyl amide	[M+H]+			Benzenoids	Benzene and substituted derivatives	Anilides	46059.4	37883.5	29541.4	32379.9	26965.8	26011.1	35067.3	26251.9	31286.1	22091.3	36191.3	32199.3	23890.2	47285.5	37407.4	29538.1	43840.6	34851.2	36186.5	32588.5	28783.7	23266	32033.4	33072.4	47550.2	49020.9	42907	46662.8
M177T235	177.086	235.261	N-(4-morpholin-4-ylphenyl)-2-nitrobenzenesulfonamide	[M+H-C6H5SO4N]+			Organoheterocyclic compounds	Oxazinanes	Morpholines	11179.9	12539.9	20741.4	21681.7	9868.56	21235.6	19259.1	6061.45	17881.7	8546.07	20334.3	19925.1	7728.29	26304.7	7393.42	21940.9	8850.34	4971.28	16070.9	11131.7	21894.1	22260.2	11506.5	12919.6	22456.6	16402.8	22514.5	22455.4
M251T387	251.137	386.971	N-(omega)-Hydroxyarginine	(M+CH3COO+2H)+	HMDB0004224	C05933	Organic acids and derivatives	Carboxylic acids and derivatives	"Amino acids, peptides, and analogues"	47949	154435	37029.5	107271	146589	63803.1	49034.2	45116.7	53763.6	52736.8	117122	133711	23961.7	45399.9	41829.4	46452.4	148561	106924	44496.3	31396.9	105482	41206.9	55029.8	108957	78438	73649.6	81740.6	66792.3
M620T404	620.262	403.678	N-[(2s)-2-[[(1z)-1-methyl-3-oxo-3-[4-(trifluoromethyl)phenyl]-1-propen-1-yl]amino]-3-[4-[2-(5-methyl-2-phenyl-4-oxazolyl)ethoxy]phenyl]propyl]propanamide	[M+H]+			Organoheterocyclic compounds	Azoles	Oxazoles	33226.9	26901	27269.7	36758.4	24266.5	30604.5	29277.2	32996.3	21884.7	31006.5	22494.9	28068.1	26312	36551.7	30853.3	11650.8	43863.9	34461.7	41288.8	9328.74	19626.9	37877.8	19212.4	29810.2	35655.2	37397.2	36115	35641.7
M426T498	426.197	498.159	N-[(3s,5s,7s)-adamantan-1-yl]-1-(4-fluorobenzyl)-1h-indazole-3-carboxamide	[M+Na]+			Organoheterocyclic compounds	Benzopyrazoles	Indazoles	32350.6	31465	31343.6	35625.2	30320.4	34495.9	32669.6	34454.1	22934.8	10917.5	33438.6	34824.5	32052.3	30965.7	39933.2	24945.6	45932.5	44907.8	55992.4	35768.6	33771.6	36780.3	34066.9	33999.8	47887	47881.2	48442.3	49619.7
M298T128	298.214	127.555	N-3-oxododecanoyl-l-homoserine lactone	[M+H]+		C21201	Organic acids and derivatives	Carboxylic acids and derivatives	Amino acids, peptides, and analogues	30274.2	177090	132233	38699.2	67114.7	54192.4	140053	57116.3	105683	60010.4	132341	82642.8	132536	122145	114970	157617	60096.7	155989	29321.9	138817	46822.2	153497	156174	134372	72318.5	124387	125765	110500
M334T244_2	334.236	244.474	N-3-oxohexadec-11z-enoyl-l-homoserine lactone	[M+H-H2O]+			Organic acids and derivatives	Carboxylic acids and derivatives	Amino acids, peptides, and analogues	115186	159398	150867	156130	130870	101208	153345	127737	135853	114698	151946	110743	113502	160162	176476	132131	108190	167232	185650	138557	147551	135936	101877	92934.8	134487	134374	160775	134304
M324T110	324.215	109.54	N-3-oxotetradec-7z-enoyl-l-homoserine lactone	[M+H]+			Organic acids and derivatives	Carboxylic acids and derivatives	Amino acids, peptides, and analogues	107127	95590.3	87642.7	80438.2	65813.3	105790	82004.3	112738	84151.5	100070	64114.4	62961.3	98827.5	96095.2	65986.9	92139.4	99520.2	94468.5	102581	77751.8	99199.6	88445	95266.6	82472.4	78737.8	91088.3	90937.8	88059.1
M224T131	224.128	131.289	N-acetyl-d-galactosaminitol	[M+H]+			Organic oxygen compounds	Organooxygen compounds	Carbohydrates and carbohydrate conjugates	2.92172e+07	2.03793e+07	1.46268e+07	8.2059e+06	2.14608e+07	1.31434e+07	2.17676e+07	2.67672e+07	3.71847e+07	7.07811e+06	1.46299e+07	8.02203e+06	1.18841e+07	1.46008e+07	5.67326e+06	5.15434e+06	1.41439e+07	1.51426e+07	1.9938e+07	6.38504e+06	1.27974e+07	2.68575e+07	9.89295e+06	1.05177e+07	2.06421e+07	2.04394e+07	2.06683e+07	1.51122e+07
M204T243	204.086	242.852	N-acetyl-d-glucosamine	[M+H-H2O]+	HMDB0000215	C00140	Organic oxygen compounds	Organooxygen compounds	Carbohydrates and carbohydrate conjugates	698592	1.21995e+06	1.30345e+06	547076	589987	1.01526e+06	1.27568e+06	713393	896294	1.66424e+06	889991	2.57657e+06	708294	1.03469e+06	923889	1.51037e+06	927353	1.15012e+06	1.08188e+06	3.37156e+06	1.26838e+06	1.61934e+06	2.53264e+06	1.2371e+06	1.43576e+06	1.43656e+06	1.43668e+06	1.68345e+06
M160T286	160.096	285.72	N-acetyl-dl-valine	[M+H]+	HMDB0011757		Organic acids and derivatives	Carboxylic acids and derivatives	Amino acids, peptides, and analogues	31974.4	67086	56635.9	70223.2	31890.8	37117.2	49958.3	41057.4	34590.4	34730	42251.9	40473.4	32453.6	79180.5	33661.2	29792.3	31292.2	61982.1	45800.3	43867.7	38758.6	45930	43286.7	36212.2	69184.5	69011.4	69138.1	79186.4
M190T378	190.07	377.807	N-acetyl-l-glutamate	[M+H]+	HMDB0001138	C00624	Organic acids and derivatives	Carboxylic acids and derivatives	Amino acids, peptides, and analogues	90666.2	49537.5	52103.6	45012.4	105396	60721.7	45283.4	38020.6	39800.9	54837.1	36468.3	57813.6	40241.7	34508.9	37922.9	36097.4	57037.8	57158.8	44035.1	63757.5	31917.8	51532.1	58681.3	46240.5	59420.3	59388.2	58805.4	55413.6
M192T269	192.086	269.291	N-acetyl-l-methionine	[M+H]+	HMDB0011745	C02712	Organic acids and derivatives	Carboxylic acids and derivatives	Amino acids, peptides, and analogues	36836.8	20177.3	19511.3	10006.5	17276.5	14524.4	9849.66	16258.8	14979.9	25444.5	18204.7	20871.6	15871.8	26310.9	21668	29753.7	16901.8	26366	24527.5	35733.1	40794.7	21637.3	16882.8	26802.4	18002.1	16600.5	16161.6	26923.2
M368T379	368.215	379.002	N-acetyl-s-farnesyl-l-cysteine	[M+H]+			Lipids and lipid-like molecules	Prenol lipids	Sesquiterpenoids	16011.8	32928.1	36693.4	30556.1	35667.8	27210.8	38270.6	21848.5	38240.3	28993.3	39864.8	35632.4	34468.8	38080.2	34482.9	35231.6	27588.3	48293.7	27136	38259.5	36950.3	20089	41296.6	33950.8	53774.6	56319.2	52106.9	51988
M145T302_2	145.133	302.022	N-acetylcadaverine	[M+H]+	HMDB0002284		Organic acids and derivatives	Carboxylic acids and derivatives	Carboxylic acid derivatives	151613	109813	109591	247933	122694	121477	165429	340345	115323	140363	132507	124549	148382	226215	134413	151897	177718	162665	121246	273179	148603	176160	198056	142254	174622	177108	177106	176414
M344T38	344.315	37.913	N-acetyldihydrosphingosine	[M+H]+			Lipids and lipid-like molecules	Sphingolipids	Ceramides	191704	55621.7	88880.2	64996.3	263314	61391.3	64004.5	93346.9	249565	48458.7	169074	58803.2	88287.1	210561	75086	35420.9	101593	48352.7	55024.6	75920.8	54530.4	53255.9	361413	125958	136964	131440	132784	133652
M465T244	465.168	243.839	N-acetylglucosamine	[2M+Na]+	HMDB0000215	C00140	Organic oxygen compounds	Organooxygen compounds	Carbohydrates and carbohydrate conjugates	12013.8	59858	51275.5	29875.2	27136.7	18940.3	14053.2	16982.6	32258.8	63935.3	26523.1	103717	10823.3	18313.6	27453.1	17980.3	11853.4	26807.4	28270.5	59584.6	13466.3	27900.3	31504.7	28311.3	21718.4	21653.1	23492.3	23477.9
M154T141	154.097	140.842	N-acetylhistamine	[M+H]+	HMDB0013253	C05135	Organic acids and derivatives	Carboxylic acids and derivatives	Carboxylic acid derivatives	922804	1.02035e+06	606187	896222	1.47973e+06	696289	1.11661e+06	1.98582e+06	621542	3.40465e+06	717701	1.53496e+06	551634	7.1811e+06	1.24753e+06	629056	495187	1.97812e+06	1.52057e+06	2.24724e+06	3.91999e+06	3.06254e+06	915872	3.41309e+06	1.81347e+06	1.94648e+06	1.81272e+06	1.84781e+06
M198T309	198.086	309.458	N-acetylhistidine	[M+H]+	HMDB0014748	C02997	Organic acids and derivatives	Carboxylic acids and derivatives	Amino acids, peptides, and analogues	28187.9	22314.6	22902.6	20197	24438.6	22734.5	20223.4	10897.4	14065.9	16713.1	42214.2	10359.7	17110.2	25824.9	25042.1	19623.5	20679.6	19325.9	14686.6	21382.5	43902.4	15566.3	9521.6	18237.3	32701.1	31775.8	34872.5	34630.8
M204T397	204.086	397.375	N-Acetylmannosamine	(M+H-H2O)+	HMDB0001129	C00645	Organic oxygen compounds	Organooxygen compounds	Carbohydrates and carbohydrate conjugates	28319	67441.8	70887.8	111191	51397.9	49421.6	72928.9	85372.8	46799.4	73145.2	73970.9	101819	73100.1	93377.3	100036	83264.7	67493.7	87081.9	89379.3	80557.1	75660.9	130729	112350	93426.3	85850.2	89454.7	88022.5	84549.8
M131T326	131.117	326.464	N-acetylputrescine	[M+H]+	HMDB0002064	C02714	Organic acids and derivatives	Carboximidic acids and derivatives	Carboximidic acids	107278	165769	76877.1	51483.8	72878.8	132976	82249	85885.2	95960.7	124039	104786	102668	79172.6	45082.1	96681.1	58669	37698.5	48931	43221.1	81641.2	141609	51486.6	48612.2	126742	80202.3	84548.4	80041.4	80040.6
M189T329_2	189.123	328.712	N-alpha-acetyl-l-lysine	[M+H]+		C12989	Organic acids and derivatives	Carboxylic acids and derivatives	Amino acids, peptides, and analogues	883906	203594	1.03346e+06	139829	81471.4	53156.4	94483.3	807842	115609	425044	86420.4	82537.6	72889.6	565889	244302	947150	899251	836497	1.03051e+06	505768	63790.1	529346	227598	450839	493361	476144	479540	476119
M406T308	406.292	307.988	N-arachidonoyl-3-hydroxy-.gamma.-aminobutyric acid	[M+H]+			Organic acids and derivatives	Carboxylic acids and derivatives	Amino acids, peptides, and analogues	10927.8	20056.1	10130	12687.3	14519.8	6400.13	6941.1	7298.23	11808.1	7540.91	27834.3	8824.81	11252.9	10790.3	9357.97	12653.9	14738	16576.4	11219.4	11081.1	12737.3	9779.61	14878.6	9281.63	20114.5	20582.9	18352.6	20573.3
M376T208	376.282	207.639	N-arachidonoyl-l-alanine	[M+H]+			Organic acids and derivatives	Carboxylic acids and derivatives	Amino acids, peptides, and analogues	46296.4	56611.4	60196	57097.4	69911.6	44218.1	57930.2	35125.1	49107.6	41471.2	43501.6	47482.7	49787.5	62311.6	49880.2	39237.1	55993.8	52522.3	69021.7	47346.7	38214.7	36783.9	75971.4	31982.2	83280	72754.3	72586	75033.3
M440T177	440.311	177.198	N-arachidonoyldopamine	[M+H]+			Benzenoids	Phenols	Benzenediols	9248.88	10371.5	14803	22565.8	29686.5	25095.7	30095.7	7059.57	42670.6	13082.4	12770.5	19817.7	26938.3	28776.7	23357.4	18533.6	31240	28761.9	31312.5	21854.1	16677.8	18653.9	28546.8	14732	40684.4	40048.8	39677.7	38895.7
M205T478	205.154	478.044	N-benzyl-n-methylpiperidin-3-amine	[M+H]+			Benzenoids	Benzene and substituted derivatives	Phenylmethylamines	248239	238238	191840	247352	204529	210829	203098	159120	221044	154977	280917	182975	213733	219171	251598	187689	243546	224147	202414	196273	185616	149954	234816	166979	330425	319947	302593	325200
M236T363	236.112	362.785	N-Carboxyethyl-.gamma.-aminobutyric acid	(M+CH3COO+2H)+						210501	166644	221133	347125	207695	226417	214247	229408	213845	653841	231258	232721	232131	332000	282416	237394	322693	327243	397824	348806	261525	459924	289885	656671	307727	307713	307637	336847
M720T99	720.431	98.721	N-demethylerythromycin	[M+H]+			Organic oxygen compounds	Organooxygen compounds	Carbohydrates and carbohydrate conjugates	20144.1	17540.9	22067.2	10242	16920.6	18275.2	17018.4	6873.12	18621.8	20965.9	16640.8	13965.9	16794.4	22561.4	15981.4	14603.5	17856.8	23041.9	20975.7	14721.8	18063.2	25466.4	19370.2	2819.3	19952.2	20187.8	21105.9	19238
M233T356	233.149	355.502	N-desbutylbupivacaine	[M+H]+	HMDB0060725		Organic acids and derivatives	Carboxylic acids and derivatives	Amino acids, peptides, and analogues	84198	87424.9	100572	89955.4	82909.9	80307.2	114511	79714.1	75442.5	69515.9	74673.4	97219.7	78551.8	77398.6	81853.2	76378.9	131232	84722.1	126552	83217.8	102827	118980	69890.3	73636.2	95816.9	90569.8	90906.6	98105.3
M301T514	301.167	513.615	N-desmethylclomipramine	[M+H]+	HMDB0060947		Organoheterocyclic compounds	Benzazepines	Dibenzazepines	29629.6	20802.3	30268.9	32268.5	32329.5	17777.8	14033.7	16240.8	22263.6	14427.4	22654.7	19299.4	28992.7	14725.8	22219.5	17496	20705	25789.6	15471	26707.7	10907.4	15297.8	17711.1	21418	24171.9	28695.5	26573.4	28525.2
M250T297	250.179	297.33	N-desmethyltramadol	[M+H]+	HMDB0061007		Benzenoids	Phenol ethers	Anisoles	71103.9	56601.2	60646.4	56901.6	102058	53496.6	65497.3	55099.3	46065.1	52160.7	70477.3	56924.6	63708.3	95366	64964	71885.4	74108.3	62311	113997	51090.1	99717.7	54484.5	58591.6	27461.6	64647.9	68854.7	67737	68870.2
M144T82	144.065	82.183	N-ethylmaleimide	[M+H+H2O]+		C02441	Organoheterocyclic compounds	Pyrrolidines	Pyrrolidones	349240	324038	302992	294771	265871	240797	274295	277811	289776	290565	285919	110045	193426	343203	153676	215657	175170	254168	236392	166121	306667	366343	338898	288040	248808	245951	248708	237601
M219T346_2	219.076	346.495	N-Formylmethionine	(M+CH3CN+H)+	HMDB0001015	C03145	Organic acids and derivatives	Carboxylic acids and derivatives	"Amino acids, peptides, and analogues"	57186.6	4017.58	12487.2	4337.42	40064.8	5904.18	50234.6	64550.5	83908.1	6643.38	4844.54	52534	51424.9	6892.17	6055.63	57840.6	5954.77	10405.4	8874.89	56197.8	55533.5	4126.48	54844.1	51973.3	13035.5	19583.9	29975.8	30007.3
M162T57_2	162.054	57.409	N-methyl-l-glutamic acid	[M+H]+	HMDB0062660	C01046	Organic acids and derivatives	Carboxylic acids and derivatives	Amino acids, peptides, and analogues	4.908e+06	299762	653634	111820	3.96972e+06	972972	1.2182e+06	1.31998e+06	5.76912e+06	2.35771e+06	4.1667e+06	1.51387e+06	391773	2.02924e+06	1.78157e+06	6.79738e+06	4.89165e+06	1.52914e+06	1.37882e+06	1.74936e+06	3.65701e+06	701538	2.64461e+06	702657	2.43797e+06	2.42704e+06	2.41543e+06	2.45555e+06
M108T243	108.08	242.977	N-methylaniline	[M+H]+		C02299	Organic nitrogen compounds	Organonitrogen compounds	Amines	28621.5	43004	30206.4	29764.2	21233.7	24477.1	30485.2	38889	16080.5	38944.9	34337.7	33789.4	21265.8	45880.3	26805.6	31720.3	21530.1	26104	23220.2	19673.9	46983.3	29119.9	35367	18425.5	33858.6	33861.5	32709.6	33577.7
M162T171	162.127	170.549	N-methylephedrine	[M+H-H2O]+			Benzenoids	Benzene and substituted derivatives	Phenylpropanes	63819.7	102617	60784.7	82441.8	36398.4	55422.7	78285.4	64804.7	38765.4	76592	66334.2	69052.5	49847.8	110382	82748.8	35018.6	36287.5	64423.8	82417.6	33559	75161.8	75977.7	71919.5	27208.3	75828.3	75608	76459.6	76841.9
M513T34	512.5	33.913	N-myristoylsphinganine	[M+H]+	HMDB0011759		Lipids and lipid-like molecules	Sphingolipids	Ceramides	226413	254545	214762	274211	246595	247034	247735	204687	268724	242049	251803	196471	229151	244911	165301	187498	191155	198352	263428	214165	272100	251786	295744	252810	228452	237985	232536	228304
M101T378	101.059	377.572	N-nitrosopyrrolidine	[M+H]+	HMDB0031642	C19285				325866	469198	422863	326662	395253	389307	468300	414848	385833	475965	350337	329295	353330	314135	444763	381063	421505	450238	459774	469586	355197	322698	385172	580165	441797	490590	441919	441426
M210T152	210.124	152.305	N-octanoyl-l-homoserine lactone	[M+H-H2O]+		C21199	Organic acids and derivatives	Carboxylic acids and derivatives	Amino acids, peptides, and analogues	154746	209169	127541	166680	103494	161214	141992	196406	113696	209690	178281	184845	130561	174365	237398	98630	123111	137762	125517	92824.8	64660.2	183636	271866	67628.8	180007	199638	190410	199396
M390T57	390.356	56.647	N-octanoylsphingosine	[M+H-2H2O]+			Lipids and lipid-like molecules	Sphingolipids	Ceramides	118264	121720	118206	90552.5	162400	133294	119754	101797	120779	123042	115620	73091.8	108345	118448	79499.1	110841	121946	96070.8	112849	102611	167519	101268	156882	120848	154068	150008	148221	153995
M730T165	729.585	165.432	N-oleoyl-d-erythro-sphingosylphosphorylcholine	[M+H]+	HMDB0012101		Lipids and lipid-like molecules	Sphingolipids	Phosphosphingolipids	4830.27	2047.37	1829.04	2558.06	2618.71	1909	1716.12	2225.46	1074.22	7898.56	4545.29	4675.62	2741.99	6790.05	3710.43	1976.48	6896.62	18810.4	17966.7	5049.62	3992.2	23191.2	6245.59	4167.74	9607.2	12261.9	6066.75	10194.9
M390T226	390.263	225.54	N-oleoyltaurine	[M+H]+			Lipids and lipid-like molecules	Fatty Acyls	Fatty amides	42223.9	46866	41719.1	40913.4	30817.5	42172.5	50178.4	32655.8	32338.1	9269.91	42301.9	40694.1	39766.5	45640.8	22769.4	36051.4	42176.5	34581.7	39212.6	39921.2	28009.6	29690.3	34409.2	34243.8	53024.7	54459.1	53764.1	55184.6
M256T35	256.263	35.2215	N-palmitoyl-d-sphingosine	[M+H-C18H34O2]+	HMDB0004949		Lipids and lipid-like molecules	Sphingolipids	Ceramides	1.29248e+06	1.07246e+06	1.09358e+06	2.31221e+06	1.16163e+06	1.16174e+06	2.73821e+06	2.66444e+06	1.35285e+06	1.29825e+06	2.44053e+06	2.37906e+06	2.42228e+06	2.48482e+06	1.98053e+06	2.21539e+06	1.20075e+06	2.3283e+06	913616	1.03091e+06	1.14176e+06	3.14101e+06	1.20512e+06	1.17303e+06	2.04509e+06	2.06641e+06	2.05863e+06	2.0263e+06
M319T391	319.164	390.855	N-phenylacetyl-l-prolylglycine ethyl ester	[M+H]+			Organic acids and derivatives	Carboxylic acids and derivatives	Amino acids, peptides, and analogues	134752	262754	184295	229172	308477	285281	252694	180243	279420	148783	284879	259152	232051	120379	241289	192481	187065	121858	124842	160460	224650	76816.5	153955	179403	221935	225349	220364	219542
M569T597	568.563	596.828	N-stearoylsphinganine	[M+H]+	HMDB0011761		Lipids and lipid-like molecules	Sphingolipids	Ceramides	3076.5	3428.93	3728.1	4443.51	4171.66	3401.93	3661.44	4296.97	3336.85	3326.18	2973.89	4109.57	3076.05	3040.82	3155.55	3654.72	3071.16	3390.61	3736.86	3509.17	3037.09	2877.28	4265.56	3609.97	3493.18	3492.94	3491.88	3801.1
M244T237	244.078	237.476	N-trifluoroacetyl-l-phenylalanine methyl ester	[M+H-CH4O]+			Organic acids and derivatives	Carboxylic acids and derivatives	Amino acids, peptides, and analogues	103549	320735	453160	45914.8	94782.5	121276	84934.4	95645.5	158892	328355	132570	362249	88874.5	94100.8	83445.6	125888	68244.7	47300	63670	265723	96357.4	120254	181133	170733	58097.7	53092.5	53172.4	54465.3
M180T88	180.065	88.271	N-tris(hydroxymethyl)methylglycine	[M+H]+			Organic acids and derivatives	Carboxylic acids and derivatives	Amino acids, peptides, and analogues	151559	48692.5	142660	270364	138606	195444	82506.2	234786	107795	171063	94132.5	98985.8	145586	181616	63299.6	78683	147623	38735.1	117537	61209.7	43826.2	143013	186373	1.42087e+06	187368	186084	193053	186071
M238T284	238.154	284.091	N,n-diethyl-3,4-dimethoxybenzamide	[M+H]+			Benzenoids	Benzene and substituted derivatives	Methoxybenzenes	5888.21	63482.9	96586.3	29943.2	24310.4	67317.6	53170.1	50005.1	52430.2	136655	45173.3	134629	42821.8	41848	43005.4	56611	49584.6	41042.1	35344.6	66266.5	42341.3	43277.5	57146.3	45038.6	70937.5	70948.5	70940.4	63944.5
M146T226_2	146.117	225.99	N,n-dimethyl-l-valine	[M+H]+			Organic acids and derivatives	Carboxylic acids and derivatives	Amino acids, peptides, and analogues	26872.8	17347	17947.2	19780.1	24523.3	19160.7	22292.7	19812.8	14567.5	114802	82115.1	21635.9	20447.6	22463.6	25293	17992.6	18971.7	19268	14358	15009.8	21439.9	11121	23228.1	7056.45	63353.3	53019.5	66658.1	39946.7
M122T212	122.096	211.783	N,n-dimethylaniline	[M+H]+	HMDB0001020	C02846	Organic nitrogen compounds	Organonitrogen compounds	Amines	36575.1	34972.1	21573.9	53632.7	15568.6	14506.9	74528	33705	15260.1	27661.1	29039.9	26467.8	14046.1	31580.1	25418.5	21408.5	13302.5	21175.7	24942.5	115976	41087.9	21239.7	22487.6	9004.22	26622.6	27502.1	26872.4	26629.9
M328T64	328.319	63.6265	N,n-dimethylsphingosine	[M+H]+	HMDB0013645		Organic nitrogen compounds	Organonitrogen compounds	Amines	157251	86808	206433	104697	95969.9	92135.8	117537	77161.5	172464	167540	147735	197814	63175.4	256109	274826	426926	298539	98279.6	215829	159443	153273	219293	130387	147762	204833	201416	202808	201406
M189T175	189.137	175.095	N,n,n-trimethyllysine	[M+H]+	HMDB0001325	C03793	Organic acids and derivatives	Carboxylic acids and derivatives	Amino acids, peptides, and analogues	33320.4	18837.1	18600	15568.3	13090.9	16043.8	31303.5	9771.23	18609.6	16516.6	15082.8	17411.1	10839.3	43389	15808.3	9018.76	8787.05	37017.6	28911.7	10385.7	29781.2	18965.8	16374.7	14811.2	21941.6	19262.9	22683	23541.4
M204T296	204.086	295.661	N,n'-diacetylchitobiose	[M+H-C8H15NO6]+	HMDB0003556	C01674	Organic oxygen compounds	Organooxygen compounds	Carbohydrates and carbohydrate conjugates	1.92968e+06	273900	1.52716e+06	120738	149917	181043	510848	666175	222167	2.55377e+06	252558	750616	1.47037e+06	1.46473e+06	1.05608e+06	3.18973e+06	3.26955e+06	2.54445e+06	2.30589e+06	3.69031e+06	2.43455e+06	2.02389e+06	1.98626e+06	1.77307e+06	1.91634e+06	1.92353e+06	1.9203e+06	1.90823e+06
M249T387	249.144	386.89	N.alpha.-Acetyl-L-lysine	(M+CH3COO+2H)+						17228.4	9437.55	83342.4	46199.1	37776.1	44119.4	51819.7	29408	25480.1	26234.2	52862.3	11901.3	43944.6	57342.7	64263.8	39315.4	30364.7	43121.4	82579.1	49985.9	55139.7	29069.9	47291	37701.1	34453.3	34555.9	34882.4	39300.5
M144T184	144.101	184.335	N.alpha.-methyl-l-lysine	[M+H-NH3]+			Organic acids and derivatives	Carboxylic acids and derivatives	Amino acids, peptides, and analogues	26995.5	166357	113843	36829.3	134277	204608	126815	158764	176906	142261	157051	113992	27586.2	120407	144653	131144	36167.7	57883.2	39067.5	145045	140124	132155	113055	113335	57093.4	54453.3	54448.5	55092.9
M144T273	144.101	273.425	N.epsilon.-methyl-l-lysine	[M+H-NH3]+	HMDB0002038	C02728	Organic acids and derivatives	Carboxylic acids and derivatives	Amino acids, peptides, and analogues	432370	321092	286987	313892	196695	503568	604226	272761	324921	273835	395481	330549	283166	306359	259871	254943	351975	320684	292965	246823	500872	215567	247985	170555	496446	525719	525700	497245
M188T412	188.175	411.757	N1-Acetylspermidine	(M+H)+						313509	569703	123946	151714	128071	161287	208659	182871	580327	279069	251079	158346	231131	96945.1	52181.9	167133	244156	131350	179752	145422	150572	116705	108420	276675	13091.4	4968.57	6819.79	12274.8
M244T201_2	244.226	201.125	N1-Acetylspermine	M+	HMDB0001186	C02567	Organic acids and derivatives	Carboxylic acids and derivatives	Carboxylic acid derivatives	2333.46	1512.56	1944.77	5740.24	3968.49	2899.98	2106.45	5122.02	4055.69	1396.91	2378.73	2884.77	5021.07	2099.72	4073.94	4804.78	2406.77	4453.87	3163.56	2462.56	4266.22	3172.41	2749.07	1420.48	3042.27	3101.3	3220.51	2783.37
M251T184	251.022	183.961	N2-Acetyl-L-ornithine	(M-H+2K)+	HMDB0003357	C00437	Organic acids and derivatives	Carboxylic acids and derivatives	"Amino acids, peptides, and analogues"	3872.02	3674.08	3718.97	3268.57	3096.77	4755.29	2753.44	9189.78	3175.07	725.167	3911.72	5081.07	2992.45	10029.9	3434.97	3486.79	2647.59	2987.61	9017.47	9048.99	3999.69	4662.4	4141.01	9706.41	2596.67	2697.03	2667.3	2640.96
M338T326	338.144	326.286	N2-isobutyryl-2'-deoxyguanosine	[M+H]+			Nucleosides, nucleotides, and analogues	Purine nucleosides	Purine 2'-deoxyribonucleosides	36169.3	30243.4	50231.4	30907.2	23037.7	44622.7	29011.1	23418.6	16998.1	26370.9	25828.1	13525.6	46285.5	42923.9	34796.3	31926.2	33640.4	26403.7	32013.9	32520.8	40072.7	33298.1	40137.7	28795.5	54450.5	57579.1	45155.5	57666.2
M200T358	200.138	358.185	N5-(1-imino-3-butenyl)-l-ornithine	[M+H]+			Organic acids and derivatives	Carboxylic acids and derivatives	Amino acids, peptides, and analogues	16287.8	13387.3	12522.2	23673.8	32375.5	9832.27	10960.5	6323.36	19960.3	18199.5	29053	14390.8	11332	13232.5	18658.9	28354.2	33718.2	26746.7	37732.2	13414.4	11123.2	16412.8	31387.2	12386.1	12436.2	12399.5	13188.5	14130.2
M202T280	202.142	279.712	N5-(1-iminobutyl)-l-ornithine	[M+H]+			Organic acids and derivatives	Carboxylic acids and derivatives	Amino acids, peptides, and analogues	37833.1	23538.9	47711.3	38081	68401	45709.3	28790.4	41219.6	29197.7	36600.1	22997.4	69851.5	46118.5	29880.3	30579	36568.5	27820.7	25357.1	20506.8	28160.9	38752.2	25855.5	34544.7	27136.3	51775.7	57860.1	55700.7	44917.5
M188T173	188.127	172.707	N6-(1-iminoethyl)-l-lysine	[M+H]+			Organic acids and derivatives	Carboxylic acids and derivatives	Amino acids, peptides, and analogues	69616.6	32532.1	71487.5	107924	64100.8	79339.3	80987.3	84778.9	51250.6	45545.6	66882.4	48146.3	74340	74092.9	85037.8	76969.5	100778	102353	100239	88973	93594.2	92195.3	80599	67486.8	95848.6	98216.1	95858.8	95856.4
M161T307	161.128	307.293	N6-methyl-l-lysine	[M+H]+	HMDB0002038	C02728	Organic acids and derivatives	Carboxylic acids and derivatives	"Amino acids, peptides, and analogues"	19502.2	17493.2	17067.1	17921	16452.5	15923.3	16643.5	21968	18004.6	19830.8	18633.8	18913.1	16345.9	20299.8	24620.4	17290.3	21457.7	19172.8	18678.5	21391.6	21751.1	22060.4	17837.7	15991.9	22855.4	20347	20324.5	20317.8
M150T112	150.076	112.308	N6-methyladenine	[M+H]+	HMDB0002099	C08434	Organoheterocyclic compounds	Imidazopyrimidines	Purines and purine derivatives	250002	234796	155292	349280	382384	225696	148312	214505	137550	89032	176365	92939.1	189239	358737	127383	131379	193969	148568	407425	181519	121945	406977	153592	347361	249860	253045	255206	255231
M189T525	189.159	525.1	N6,N6,N6-Trimethyl-L-lysine	[M+H]+	HMDB0001325	C03793	Organic acids and derivatives	Carboxylic acids and derivatives	Amino acids, peptides, and analogues	532316	494340	563171	498058	392476	406693	469957	241983	495702	587239	486204	622995	411228	395660	647155	454720	449667	588582	384199	727672	526542	324860	587271	591724	875064	880961	891873	891847
[truncated: 1,142 more rows]
